# Supplementary material for: Investigating the Protein Signature of Adamantinomatous Craniopharyngioma Pediatric Brain Tumor Tissue: Towards the Comprehension of Its Aggressive Behavior
Source: Dis Markers. 2019 May 2;2019:3609789. doi: 10.1155/2019/3609789 (PMC6525946; doi:10.1155/2019/3609789)
Supplement: Supplementary Materials — The supplementary data file encloses the top-down identification data from Proteome Discoverer software elaboration and manual identifications (S1 and S2, respectively), the Proteome Discoverer software multireport data file of bottom-up identifications (S3), the input gene list for pathway classification analysis, the PANTHER pathway classification results and their relative gene component lists (S4, S5, and S6, respectively), and the PANTHER and REACTOME pathway overrepresentation analysis results (S7 and S8, respectively). Supplementary Table S1 reports the distribution of the identified protein elements within the AC samples analysed. [file 3609789.f1.xlsx]

## Sheet: S1_top down data ProtDisc
AC SAMPLE								AC1	AC7					AC3		AC4		AC5		AC6
Sequence	Protein Group Accessions	# PSMs	# Proteins	# Protein Groups	MH+ [Da]	q-Value	PEP	A2	G2	XCorr A2	XCorr G2	B2	XCorr B2	C2	XCorr C2	D2	XCorr D2	E2	XCorr E2	F2	XCorr F2	# Missed Cleavages
QTERGTESNKTAAVAPISVPAPVAAAATAAAITATAATITTTMVAAAPVAVAAAAAPAAAAAPSPATAAATAAAVSPAAAGQIPAAASVASAAAVAPSAAAAAAVQVAPAAPA	Q4VCS5	1	1	1	9811.2	0.001	0.0436					High	3.49631									0
VSANIRELTLQNMKMANKCCSPSDQVVHMGWVNEKLQGADSSQTFRPKFLALKGPSFYVFSTPPVSTFDWVRAERTYHLCEVLFK	Q9NY99	1	1	1	9708.93	0.003	0.01808	High		0.245763												0
LQFLSTSKSKASFFLSHDQRFFLKTQGRREVQALLAHLPRYVQHLQRHPHSLLARLLGVHSLRVDRGKKTYFIVMQSVFYP	Q5T9C9	1	1	1	9559.26	0.006	0.3597							High	0.248333							0
FDEMTQTMDKGFPQRVVKHFPGISIRVDAAFQYKGFFFFSRGSKQFEYDIKTKNITRIMRTNTWFQCKEPKNSSFGFDI	Q9H306	1	1	1	9414.66	0.008	0.1417													High	0.247	0
VEFMPFLITLKQFLKGIPKQNCIVLYGPPDTGKSHFGMSLIKFIQGVVISYVNSTSHFWLSPLADAKMALLDDATPGCW	Q82007	1	1	1	8769.62	0.006	0.08112	High		0.479478												0
TIPKEQRTRVAHFLEKQGFKQQALTVSTDPEHRFELALQLGELKIAYQLAVEAESEQKWKQLAELAISKCQFGLA	P35606	1	1	1	8564.63	0.003	0.03546	High		2.19792												0
RGFLVLTMCVSAVLGSQRIGLHGSGGLCTLVLSFIAGTKWSQEKMKVQKIITTVWDIFQPLLFGLVGAEVSVSSLESNIV	Q4ZJI4	1	1	1	8562.62	0.005	0.05739	High		3.94676												0
MQIFVKTLTGKTITLEVEPSDTIENVKAKIQDKEGIPPDQQRLIFAGKQLEDGRTLSDYNIQKESTLHLVLRLRGG	P0CG48	5	4	1	8560.62	0	0.0009468	High		6.5266		High	6.58438			High	7.55371					0
HLLLDKLILLVIRPPVIAGQIVNLGQASFEAMASIINRLHKNLEGNHDQHGRNSLLASYIHYVFRLPNTYPNSSSPG	Q96N67	1	1	1	8550.63	0.006	0.4078							High	0.247167							0
KLFPSIISITWPLLFFEYEGNFIQKFQRELSTKWVLNTVSTGAHVLLGKILQNHMLDLRISNSKLFWRALAM	Q14397	1	1	1	8447.58	0.006	0.1025	High		3.64812												0
MQIFVKTLTGKTITLEVEPSDTIENVKAKIQDKEGIPPDQQRLIFAGKQLEDGRTLSDYNIQKESTLHLVLRLR	P0CG48	3	4	1	8446.54	0	0.001109	High		6.15937		High	4.06446									0
MQIFVKTLTGKTITLEVEPSDTIENVKAKIQDKEGIPPDQQRLIFAGKQLEDGRTLSDYNIQKESTLHLVLRL	P0CG48	1	4	1	8290.51	0	0.01891					High	6.14014									0
TSGSTTTTRRSCSKTVTKTVIGPDGHKEVTKEVVTSEDGSDCPEAMDLGTLSGIGTLDGFRHRHPDEAAF	P02671	1	1	1	7376.59	0	0.1559							High	5.14688							0
TLSELHCDKLHVDPENFRLLGNVLVCVLAHHFGKEFTPPVQAAYQKVVAGVANALAHKYH	P68871	1	1	1	6644.4	0.003	0.1026					High	4.85053									0
YAGPFSQHNYRQGYATQTMGPWHLGKLEIDFGECPGTTVTIQEDCDHRGPSLRTTTASG	Q2YHF2	1	1	1	6483.03	0.004	0.05889													High	1.87498	0
ERIAGEASRLAHYNKRSTITSREIQTAVRLLLPGELAKHAVSEGTKAVTKYTSSK	Q99877;P58876;Q5QNW6	2	9	3	6023.3	0	0.2019							High	7.08643							0
FSNLQIRETSLDTKSVSEGHLKRNIVVKTVEMRDGEVIKESKQEHKDVM	P14136	11	1	1	5667.94	0	0.004527	High	High	6.94265	5.50924	High	6.84548									0
SNLQIRETSLDTKSVSEGHLKRNIVVKTVEMRDGEVIKESKQEHKDVM	P14136	6	1	1	5520.88	0	0.001158	High		7.79843												0
EKVLQQEAEIDSIHQLVVGATENIKEGNEDIREAIKNNAGFRVWILFF	Q9P2W9	1	1	1	5510.84	0.009	0.1149	High		3.15636												0
SSLNLRETNLDSLPLVDTHSKRTLLIKTVETRDGQVINETSQHHDDLE	P08670	8	1	1	5467.8	0	0.001189	High		6.42378		High	6.09474									0
FSNLQIRETSLDTKSVSEGHLKRNIVVKTVEMRDGEVIKESKQEHKD	P14136	2	1	1	5437.84	0	0.006276					High	5.30943									0
GSYMEVEDNRSQVETDDLILKPGVVHVIDVDRGEEKKGKDQSGEVLSSV	P55087	1	1	1	5385.7	0.007	0.2209									High	4.92235					0
QIRETSLDTKSVSEGHLKRNIVVKTVEMRDGEVIKESKQEHKDVM	P14136	75	1	1	5206.72	0	0.001572	High	High	8.12326	7.06168	High	8.18005			High	5.71055					0
GSYMEVEDNRSQVETDDLILKPGVVHVIDVDRGEEKKGKDQSGEVLS	P55087	1	1	1	5199.58	0	0.0687											High	6.03608			0
NLRETNLDSLPLVDTHSKRTLLIKTVETRDGQVINETSQHHDDLE	P08670	2	1	1	5180.67	0	0.005186													High	5.50392	0
KGVVKAEKSKKKKEEEEDEEDEEDEEEEEDEEDEDEEEDDDD	P09429	1	1	1	5060.04	0	1.42e-05													High	6.02226	0
QIRETSLDTKSVSEGHLKRNIVVKTVEMRDGEVIKESKQEHKD	P14136	22	1	1	4976.62	0	1.98e-05					High	9.70786									0
RETNLDSLPLVDTHSKRTLLIKTVETRDGQVINETSQHHDDLE	P08670	5	1	1	4953.53	0	2.555e-05					High	6.35081							High	7.05654	0
FESFGDLSTPDAVMGNPKVKAHGKKVLGAFSDGLAHLDNLKGTFATL	P68871	1	1	1	4901.55	0.008	0.1415													High	3.72897	0
YQFVREPEDEEEEEEEEEEDEDEDLEELEVLERKPAAGLS	Q9NQC3	1	1	1	4811.12	0	6.411e-06									High	7.62873					0
LEAIPMSIPPEVKFNKPFVFLMIEQNTKSPLFMGKVVNPTQK	P01009	2	1	1	4787.58	0	0.07286		High		3.03854											0
FESFGDLSTPDAVMGNPKVKAHGKKVLGAFSDGLAHLDNLKGTFA	P68871	4	1	1	4687.4	0	0.0001027					High	5.29883							High	5.70554	0
EAIPMSIPPEVKFNKPFVFLMIEQNTKSPLFMGKVVNPTQK	P01009	16	1	1	4674.47	0	2.735e-05		High		4.07921											0
SKPDEPGKAGETPSEEKKGEGDAATEQAAPQAPASSEEKAGSAETES	P17677	1	1	1	4671.14	0	0.000183	High		7.17822												0
SALVETRTIVRFNRPFLMIIVPTDTQNIFFMSKVTNPKQA	P01011	7	1	1	4623.52	0	1.075e-12		High		6.84102	High	7.08294			High	6.65557			High	5.62485	0
FESFGDLSTPDAVMGNPKVKAHGKKVLGAFSDGLAHLDNLKGTF	P68871	1	1	1	4616.36	0	9.245e-07													High	5.626	0
SKPDEPGKAGETPSEEKKGEGDAATEQAAPQAPASSEEKAGSAETE	P17677	1	1	1	4584.1	0.003	0.02194	High		4.37849												0
RNDEELNKLLGKVTIAQGGVLPNIQAVLLPKKTESHHKAKGK	P0C0S8	1	3	1	4572.61	0	0.1562							High	7.16125							0
NLDSLPLVDTHSKRTLLIKTVETRDGQVINETSQHHDDLE	P08670	2	1	1	4567.34	0.002	0.01135													High	4.49352	0
VHLTPEEKSAVTALWGKVNVDEVGGEALGRLLVVYPWTQRF	P68871	5	1	1	4564.43	0	2.108e-11					High	6.95106			High	5.6272			High	6.04832	0
SEAGKKGPGRPTGSKKKNEPEDEEEEEEEEDEDEEEEDED	P26583	1	1	1	4563.9	0.004	0.05086													High	3.34995	0
AEKSKKKKEEEEDEEDEEDEEEEEDEEDEDEEEDDDD	P09429	1	1	1	4548.71	0	5.584e-08													High	4.02134	0
IPMSIPPEVKFNKPFVFLMIEQNTKSPLFMGKVVNPTQK	P01009	1	1	1	4474.42	0	2.164e-05		High		5.98591											0
LVETRTIVRFNRPFLMIIVPTDTQNIFFMSKVTNPKQA	P01011	7	1	1	4465.44	0	4.662e-09	High	High	7.23933	7.55017					High	7.01504					0
FLSFPTTKTYFPHFDLSHGSAQVKGHGKKVADALTNAVAHV	P69905	3	1	1	4424.3	0	1.831e-05							High	8.15796					High	7.36694	0
RSYVSSGEMMVGGLAPGRRLGPGTRLSLARMPPPLPTRVDF	P14136	1	1	1	4382.32	0	0.02851									High	4.47775					0
VETRTIVRFNRPFLMIIVPTDTQNIFFMSKVTNPKQA	P01011	23	1	1	4352.35	0	5.041e-07	High	High	7.12112	7.57105	High	7.29992	High	5.46347	High	6.85091	High	6.77186	High	7.65775	0
DSLPLVDTHSKRTLLIKTVETRDGQVINETSQHHDDLE	P08670	3	1	1	4340.22	0	0.0005053													High	4.69726	0
VIRDAVTYTEHAKRKTVTAMDVVYALKRQGRTLYGFGG	P62805	1	1	1	4271.3	0.004	0.3268							High	4.86556							0
MSIPPEVKFNKPFVFLMIEQNTKSPLFMGKVVNPTQK	P01009	27	1	1	4264.28	0	2.092e-06		High		6.69336					High	3.91718					0
ETRTIVRFNRPFLMIIVPTDTQNIFFMSKVTNPKQA	P01011	1	1	1	4253.27	0	3.579e-08													High	6.75137	0
SLPLVDTHSKRTLLIKTVETRDGQVINETSQHHDDLE	P08670	5	1	1	4225.19	0	0.02515					High	3.88136			High	3.86232					0
SIPPEVKFNKPFVFLMIEQNTKSPLFMGKVVNPTQK	P01009	19	1	1	4133.24	0	2.597e-07		High		6.11017	High	3.14503			High	2.86828			High	8.4403	0
TRTIVRFNRPFLMIIVPTDTQNIFFMSKVTNPKQA	P01011	1	1	1	4124.22	0	1.874e-06	High		6.5551												0
RSYVSSGEMMVGGLAPGRRLGPGTRLSLARMPPPLPTRV	P14136	2	1	1	4120.22	0	7.419e-07					High	5.34666									0
KGPGRPTGSKKKNEPEDEEEEEEEEDEDEEEEDED	P26583	1	1	1	4091.67	0	1.819e-09													High	5.35935	0
DIKPQLELIEDEEKLKETEPVEAYVIQKEREVTK	P46821	3	1	1	4069.15	0	6.017e-08	High		8.54086		High	7.71978									0
IPPEVKFNKPFVFLMIEQNTKSPLFMGKVVNPTQK	P01009	20	1	1	4046.2	0	0.0001156	High	High	6.75682	6.33173	High	4.75731	High	4.52035	High	6.27139			High	6.45229	0
SVSEGHLKRNIVVKTVEMRDGEVIKESKQEHKDVM	P14136	115	1	1	4035.12	0	0.0002611	High	High	7.51403	6.98262	High	7.11228			High	7.61414	High	4.49704			0
AAEAAAAPAESAAPAAGEEPSKEEGEPKKTEAPAAPAAQETK	P80723	1	1	1	4029.97	0.003	0.02299													High	3.26956	0
RTIVRFNRPFLMIIVPTDTQNIFFMSKVTNPKQA	P01011	6	1	1	4023.18	0	1.993e-14	High	High	7.44335	6.46705	High	7.8748	High	6.36836	High	7.3115					0
VPLPSPVQDSENLSGESGTFYEGTDDKVRRDLATDLS	P11137	1	1	1	3994.91	0	0.003434									High	4.45753					0
VAFQDVAQNPANMSKYQSNPKVMNLISKLSAKFGGQA	P50502	2	2	1	3982.04	0	0.004533					High	3.50952							High	3.23735	0
PPEVKFNKPFVFLMIEQNTKSPLFMGKVVNPTQK	P01009	1	1	1	3933.1	0	4.639e-07													High	6.3776	0
LVDTHSKRTLLIKTVETRDGQVINETSQHHDDLE	P08670	1	1	1	3928.03	0.006	0.384							High	4.59739							0
SVSEGHLKRNIVVKTVEMRDGEVIKESKQEHKDV	P14136	8	1	1	3904.08	0	0.0001066	High		3.95244		High	5.71561									0
VCVLAHHFGKEFTPPVQAAYQKVVAGVANALAHKYH	P68871	6	1	1	3901.03	0	5.015e-07							High	6.20469					High	8.33298	0
KTTTTPGRKPRGRPKKLEKEEEEGISQESSEEEQ	P17096	1	1	1	3898.98	0	0.2558							High	1.30717							0
TSREIQTAVRLLLPGELAKHAVSEGTKAVTKYTSSK	Q99877;P58876;Q5QNW6	4	10	3	3870.16	0	0.01702							High	8.43598							0
RSYVSSGEMMVGGLAPGRRLGPGTRLSLARMPPPLPT	P14136	9	1	1	3865.08	0	0.01184	High		5.13439		High	5.54961			High	5.26465					0
RGPPRQRQPREDGNEEDKENQGDETQGQQPPQR	P67809	1	1	1	3856.82	0	0.001086													High	2.14925	0
LVTLAAHLPAEFTPAVHASLDKFLASVSTVLTSKYR	P69905	10	1	1	3854.12	0	9.67e-13	High		6.59938		High	6.60604			High	6.21265			High	8.33569	0
VGPEADKYRLTYAYFAGGDAGDAFDGFDFGDDPSDK	P02679	1	1	1	3849.69	0	0.02198											High	5.69328			0
VDTHSKRTLLIKTVETRDGQVINETSQHHDDLE	P08670	13	1	1	3814.94	0	9.951e-08					High	7.04648	High	5.01879	High	3.93476			High	6.5013	0
SVSEGHLKRNIVVKTVEMRDGEVIKESKQEHKD	P14136	53	1	1	3805.02	0	3.277e-12	High		3.29445		High	8.47463					High	3.3871			0
EGHLKRNIVVKTVEMRDGEVIKESKQEHKDVM	P14136	65	1	1	3761.98	0	5.911e-06	High		8.50113		High	5.50861			High	8.50256	High	4.92776			0
KTDAPQPDVKEEEEEKEEEKDKGDEEEEGEEK	P27824	1	1	1	3761.67	0	3.097e-06													High	4.30135	0
GLKRTPMGIVLDALEQQEEGINRLTDYISKVKE	O75915	1	1	1	3744.01	0	0.2582							High	5.90489							0
VTLAAHLPAEFTPAVHASLDKFLASVSTVLTSKYR	P69905	3	1	1	3741.02	0	2.526e-05					High	6.23067							High	6.83991	0
VSETESRGSESGIFTNTKESSSHHPGIAEFPSRGK	P02671	1	1	1	3732.79	0.008	0.1988													High	3.09787	0
SVSEGHLKRNIVVKTVEMRDGEVIKESKQEHK	P14136	3	1	1	3689.99	0	0.007992					High	4.49565									0
GEKKDDVQAAEAEANKKDEAPVADGVEKKGEGTTTA	P17677	1	1	1	3686.79	0	0.003936	High		3.40066												0
SEAREDMAALEKDYEEVGVDSVEGEGEEEGEEY	P68363	1	2	1	3679.53	0	1.131e-09													High	6.91111	0
FDKSKLKKTETQEKNPLPSKETIEQEKQAGES	P62328	3	1	1	3675.92	0	0.1216	High		4.08272				High	4.88516							0
FSNLQIRETSLDTKSVSEGHLKRNIVVKTVEM	P14136	1	1	1	3658.96	0	4.516e-09					High	5.59879									0
RRPENPKPQDGKETKAADPPAENSSAPEAEQGGAE	P67809	1	1	1	3658.75	0	0.005109													High	3.70736	0
SETESRGSESGIFTNTKESSSHHPGIAEFPSRGK	P02671	2	1	1	3633.72	0	0.0845							High	5.30782							0
TTPGRKPRGRPKKLEKEEEEGISQESSEEEQ	P17096	1	1	1	3568.79	0.006	0.4465							High	2.47538							0
LAAHLPAEFTPAVHASLDKFLASVSTVLTSKYR	P69905	8	1	1	3540.9	0	1.954e-20					High	6.43221	High	4.82464	High	6.96439			High	7.05235	0
EGHLKRNIVVKTVEMRDGEVIKESKQEHKD	P14136	9	1	1	3531.89	0	8.065e-07					High	6.86589									0
SNLQIRETSLDTKSVSEGHLKRNIVVKTVEM	P14136	2	1	1	3511.89	0	3.599e-11					High	8.65604									0
HSKRTLLIKTVETRDGQVINETSQHHDDLE	P08670	2	1	1	3499.79	0	0.2065							High	5.71888							0
VLSPADKTNVKAAWGKVGAHAGEYGAEALERMF	P69905	38	1	1	3473.77	0	1.164e-06	High	High	3.90364	3.39797	High	7.0581	High	5.74156	High	8.31516	High	3.98588	High	7.29156	0
TVATPLNQVANPNSAIFGGARPREEVVQKEQE	Q15056	3	1	1	3449.79	0	0.01926									High	2.92264	High	4.64865			0
VKKDEGEGAAGAGDHKDPSLGAGEAASKESEPKQS	Q02952	1	1	1	3437.61	0	0.0003876											High	5.43872			0
GHRPLDKKREEAPSLRPAPPPISGGGYRARPA	P02675	1	1	1	3433.88	0.004	0.3054							High	4.80005							0
AAHLPAEFTPAVHASLDKFLASVSTVLTSKYR	P69905	38	1	1	3427.83	0	8.36147e-13	High		8.65376		High	8.37091	High	6.58371	High	7.98461	High	7.67306	High	7.19162	0
KQPPVSPGTALVGSQKEPSEVPTPKRPRGRPK	P17096	1	1	1	3405.91	0.004	0.325							High	4.17244							0
SETGAGKHVPRAVFVDLEPTVIDEVRTGTYR	P68363	1	3	1	3399.76	0.004	0.06573													High	3.00428	0
GKKGKADAGKEGNNPAENGDAKTDQAQKAEGAGDA	P05204	2	1	1	3398.63	0	0.04917											High	4.20217			0
VHLTPEEKSAVTALWGKVNVDEVGGEALGRLL	P68871	2	1	1	3387.84	0	3.215e-06					High	5.82845							High	4.57579	0
KGKADAGKEGNNPAENGDAKTDQAQKAEGAGDAK	P05204	8	1	1	3341.6	0	0.0001107	High		5.26091						High	4.05766			High	3.44193	0
FDKSKLKKTETQEKNPLPSKETIEQEKQ	P62328	1	1	1	3331.78	0	0.09435							High	5.8072							0
KEDLRPSAPQQEGEASKEKEEVAEEAQSGGD	O76070	1	1	1	3328.54	0	0.01032											High	7.38526			0
VLSPADKTNVKAAWGKVGAHAGEYGAEALERM	P69905	24	1	1	3326.69	0	0.001823					High	6.89092	High	7.32476	High	5.27768			High	6.51249	0
KRNIVVKTVEMRDGEVIKESKQEHKDVM	P14136	6	1	1	3325.79	0	0.0006894	High		6.15388						High	6.89927					0
MGNPKVKAHGKKVLGAFSDGLAHLDNLKGTFA	P68871	1	1	1	3321.8	0	0.008559							High	8.28998							0
SKLKKTETQEKNPLPSKETIEQEKQAGES	P62328	17	1	1	3285.73	0	0.0003293	High		3.57313		High	3.90563	High	8.72925	High	5.75052	High	7.72426	High	3.58212	0
VHLTPEEKSAVTALWGKVNVDEVGGEALGRL	P68871	1	1	1	3274.75	0	0.03209							High	6.77078							0
SGEMMVGGLAPGRRLGPGTRLSLARMPPPLPT	P14136	1	1	1	3272.74	0.001	0.03637					High	3.49202									0
GSYMEVEDNRSQVETDDLILKPGVVHVID	P55087	5	1	1	3257.61	0	6.485e-12	High	High	4.24354	4.53454	High	6.01743			High	5.40113	High	4.86943			0
TETKPSVTEKEVPSKEEPSPVKAEVAEKQA	P46821	1	1	1	3252.7	0	4.03e-06	High		8.50242												0
KGKADAGKEGNNPAENGDAKTDQAQKAEGAGDA	P05204	2	1	1	3213.51	0	0.005224													High	3.87672	0
AAAPAESAAPAAGEEPSKEEGEPKKTEAPAAPAA	P80723	1	1	1	3201.56	0	0.07272											High	2.51429			0
RNIVVKTVEMRDGEVIKESKQEHKDVM	P14136	152	1	1	3197.68	0	6.782e-05	High	High	8.07618	7.83257	High	8.088			High	8.53278	High	6.70016			0
AKLKKTETQEKNTLPTKETIEQEKRSE	P63313	2	1	1	3187.72	0	0.01138							High	5.69983							0
SGVSLAALKKALAAAGYDVEKNNSRIKLGLK	P16403;P16402;P10412	1	3	3	3185.84	0	5.833e-05													High	3.55755	0
KESSETPDQFMTADETRNLQNVDMKIGV	P16070	3	1	1	3183.5	0	1.071e-12	High	High	5.61809	5.15703	High	6.30196									0
RVAPEEHPVLLTEAPLNPKANREKMTQI	P60709	1	2	1	3181.71	0	0.1256							High	6.11738							0
RTLLIKTVETRDGQVINETSQHHDDLE	P08670	8	1	1	3147.6	0	1.842e-17	High		5.10246		High	4.73808			High	5.27032			High	7.6145	0
SEQENPDSSEPVVEDERLHHDTDDVTY	Q12797	1	1	1	3142.34	0	0.002794													High	4.27678	0
AEVAPVKDMAQLPETEIAPAKDVAPSTVKE	P27816	1	1	1	3134.63	0	1.302e-07					High	5.52976									0
RSYVSSGEMMVGGLAPGRRLGPGTRLSLAR	P14136	1	1	1	3131.67	0	6.989e-08					High	6.27522									0
IIDGVPVEITEKETREERIITGPEIKY	Q15063	1	1	1	3127.69	0	0.000556													High	3.61799	0
KRNIVVKTVEMRDGEVIKESKQEHKD	P14136	1	1	1	3095.67	0	2.921e-09					High	5.67873									0
VEAPKLKVQHKFVEEIIEETKVEDEK	P07197	1	1	1	3094.67	0	0.02764											High	5.5033			0
WGKVNVDEVGGEALGRLLVVYPWTQRF	P68871	1	1	1	3088.64	0	0.0001071													High	3.37896	0
RMQNDTAENETTEKEEKSESRQERY	Q05682	1	1	1	3088.39	0.002	0.01361													High	2.73622	0
GKADAGKEGNNPAENGDAKTDQAQKAEGAGDA	P05204	1	1	1	3085.41	0	4.422e-05											High	7.88645			0
AKVAVLGASGGIGQPLSLLLKNSPLVSRLTL	P40926	1	1	1	3072.85	0	0.1531							High	5.98887							0
LKKTETQEKNPLPSKETIEQEKQAGES	P62328	1	1	1	3070.6	0.006	0.1116													High	2.24014	0
SKLKKTETQEKNPLPSKETIEQEKQAG	P62328	4	1	1	3069.65	0	0.02762							High	8.59281							0
RNIVVKTVEMRDGEVIKESKQEHKDV	P14136	15	1	1	3066.63	0	2.074e-05	High		5.73816		High	6.46186			High	8.41582					0
AIGGGLSSVGGGSSTIKYTTTSSSSRKSYKH	P02538	1	2	1	3061.56	0.006	0.3602							High	2.70416							0
LQREATNPPVIQEEKPKKKKKAQEDL	P30101	1	1	1	3045.71	0	0.1659							High	3.84003							0
NIVVKTVEMRDGEVIKESKQEHKDVM	P14136	11	1	1	3041.58	0	0.0003804	High	High	4.95588	4.11452	High	4.47895			High	6.32726					0
GHRPLDKKREEAPSLRPAPPPISGGGYR	P02675	4	1	1	3038.64	0	0.06303							High	4.9818			High	3.83384			0
GSRTPVPSTVQANTFEFADAEEDDEVKV	Q00587	1	1	1	3038.43	0	1.647e-08					High	4.46264									0
SKLKKTETQEKNPLPSKETIEQEKQA	P62328	1	1	1	3012.62	0	0.2423							High	4.25492							0
QPREDGNEEDKENQGDETQGQQPPQR	P67809	1	1	1	3009.33	0.004	0.1032													High	3.26456	0
APEPHVEEDDDDELDSKLNYKPPPQK	P52566	2	1	1	3005.42	0	3.844e-12													High	8.91989	0
TLLIKTVETRDGQVINETSQHHDDLE	P08670	14	1	1	2991.51	0	5.27e-07	High		4.66771		High	5.65421	High	5.19552	High	6.15061	High	4.75729	High	6.07027	0
LKKTETQEKNTLPTKETIEQEKRSE	P63313	2	1	1	2988.59	0	0.05543							High	3.93409							0
VRLLLPGELAKHAVSEGTKAVTKYTSSK	P58876;Q99877;Q5QNW6	3	12	3	2983.71	0	0.04333							High	7.93017							0
RETNLDSLPLVDTHSKRTLLIKTVET	P08670	2	1	1	2979.65	0	0.2709							High	3.54727					High	3.29232	0
SEQENPDSSEPVVEDERLHHDTDDVT	Q12797	1	1	1	2979.28	0.002	0.0101													High	2.12363	0
VPIAQVKDVYVVTDQIPVFVTMFQKN	Q14956	1	1	1	2978.6	0.003	0.02475	High		3.47715												0
RSYVSSGEMMVGGLAPGRRLGPGTRLSLA	P14136	6	1	1	2975.57	0	7.832e-05	High		4.80459		High	6.30002			High	6.60039					0
KAAATKKPAPEKKPAEKKPTTEEKKPAA	P36578	2	1	1	2973.71	0	0.1673							High	3.21598							0
AKLKKTETQEKNTLPTKETIEQEKR	P63313	1	1	1	2971.65	0	0.1801							High	4.28672							0
VRLLLPGELAKHAVSEGTKAVTKYTSAK	O60814	2	3	1	2967.7	0	0.03459							High	7.41967							0
RNIVVKTVEMRDGEVIKESKQEHKD	P14136	59	1	1	2967.57	0	7.207e-16	High		6.90576		High	8.68074			High	6.62173					0
ECPIAEENLARGLLDLGHAGRLGISCTR	O60318	1	1	1	2964.5	0.006	0.09484	High		2.96565												0
ISWYDNEFGYSNRVVDLMAHMASKE	P04406	1	1	1	2962.35	0	3.668e-11													High	3.7951	0
KKTETQEKNPLPSKETIEQEKQAGES	P62328	4	1	1	2957.51	0	5.182e-07	High		5.45125				High	3.04882			High	4.60982			0
SSDFNSDTHSSTFDAGAGIALNDHFVKL	P04406	1	1	1	2953.38	0.006	0.3969							High	3.7923							0
MEVEDNRSQVETDDLILKPGVVHVID	P55087	2	1	1	2950.5	0.004	0.2082									High	2.6544	High	2.99593			0
KTETQEKNTLPTKETIEQEKRSEIS	P63313	1	1	1	2947.53	0	0.001392	High		5.31138												0
SKLKKTETQEKNPLPSKETIEQEKQ	P62328	8	1	1	2941.59	0	0.02055					High	2.47269	High	8.01129					High	4.52683	0
IVVKTVEMRDGEVIKESKQEHKDVM	P14136	5	1	1	2927.53	0	0.002918	High		4.60693						High	5.18209					0
RMQNDTAENETTEKEEKSESRQER	Q05682	1	1	1	2925.33	0	0.0002325													High	3.83312	0
KVVDYSQFQESDDADEDYGRDSGPPT	Q9H1E3	1	1	1	2920.24	0.006	0.3948							High	2.2815							0
EAPAEGEAAEPGSPTAAEGEAASAASSTSSPK	P29966	1	1	1	2915.32	0	0.004229													High	3.53396	0
NIVVKTVEMRDGEVIKESKQEHKDV	P14136	2	1	1	2910.54	0	0.0001071					High	3.79656			High	4.9566					0
RSYVSSGEMMVGGLAPGRRLGPGTRLSL	P14136	3	1	1	2904.54	0	3.605e-05					High	5.15794			High	4.86978					0
AIHAKRVTIMPKDIQLARRIRGERA	Q6NXT2	1	4	1	2899.71	0	0.2736							High	1.9004							0
AQGPAASAEEPKPVEAPAANSDQTVTVKE	P80723	5	1	1	2892.43	0	2.637e-16		High		5.24603			High	6.93056			High	7.6843	High	9.50074	0
LLIKTVETRDGQVINETSQHHDDLE	P08670	4	1	1	2890.46	0	2.349e-11	High		6.14516		High	7.21945			High	4.2911			High	3.4178	0
RLLLPGELAKHAVSEGTKAVTKYTSSK	P58876;Q99877;Q5QNW6	2	12	3	2884.63	0	0.04394							High	7.14731							0
KKTETQEKNTLPTKETIEQEKRSE	P63313	1	1	1	2875.5	0	0.155							High	4.00039							0
GNPEQTPVLKPEEEAPAPEVGASKPEGI	P04004	1	1	1	2870.44	0	4.35203e-05							High	7.01937							0
ETKPKESARQDEGKEEEPEADQEHA	P17677	2	1	1	2867.3	0	0.03512					High	2.76928			High	2.95097					0
YTSHVQEEQIEVEETIEAAKAEEAK	P07196	1	1	1	2861.37	0	0.0001919											High	6.06146			0
RNIVVKTVEMRDGEVIKESKQEHK	P14136	25	1	1	2852.56	0	3.341e-06	High		7.1274		High	7.7532			High	7.06931					0
AAATKKPAPEKKPAEKKPTTEEKKPAA	P36578	2	1	1	2845.62	0	0.264							High	2.1076							0
SVGRDEREDITHTYKYPEGSSEER	P21980	1	1	1	2840.32	0	1.673e-08													High	5.48465	0
KTETQEKNPLPSKETIEQEKQAGES	P62328	24	1	1	2829.42	0	5.468e-10	High	High	6.7465	3.73951	High	5.46119	High	5.40531	High	5.13347	High	5.96537	High	6.63398	0
KAEGAQNQGQKGEGAQNQGKKTEGAQGK	Q9P2E9	1	1	1	2827.42	0	7.353e-05													High	2.97143	0
AESADAALQGDPALQDAGDSSRKEYFI	P04921	1	1	1	2825.32	0.004	0.07985													High	1.98267	0
SVSEGHLKRNIVVKTVEMRDGEVIK	P14136	12	1	1	2823.56	0	1.051e-06	High		4.89249		High	5.24335			High	5.33983					0
SYVSSGEMMVGGLAPGRRLGPGTRLSLA	P14136	1	1	1	2819.47	0.001	0.06881					High	2.40166									0
VVKTVEMRDGEVIKESKQEHKDVM	P14136	3	1	1	2814.45	0	0.0004875	High		3.92947						High	4.24135					0
SKLKKTETQEKNPLPSKETIEQEK	P62328	3	1	1	2813.53	0	0.02918							High	6.61782					High	3.91778	0
NIVVKTVEMRDGEVIKESKQEHKD	P14136	5	1	1	2811.47	0	1.382e-12	High		3.89402		High	7.02539									0
GDVDVSLPKVESDLKGPEVDIEGPEGK	Q09666	1	1	1	2808.42	0	6.351e-11													High	4.69998	0
RTIVEEVQDGKVISSREQVHQTTR	Q04695	1	1	1	2795.48	0	0.07016							High	5.34907							0
RSYVSSGEMMVGGLAPGRRLGPGTRLS	P14136	4	1	1	2791.45	0	3.895e-06	High		6.6875		High	6.31381			High	6.69015					0
RLKTDNAGDQHGGGGGGGGGAGAAGGGGGGENY	P14866	1	1	1	2786.23	0	2.694e-06													High	3.68829	0
REDGNEEDKENQGDETQGQQPPQR	P67809	1	1	1	2784.21	0	0.0002103													High	3.60787	0
LIKTVETRDGQVINETSQHHDDLE	P08670	35	1	1	2777.38	0	1.157e-09	High	High	7.22409	5.54484	High	7.81534	High	6.0708	High	8.39796	High	7.47652	High	7.37396	0
SGVSLAALKKALAAAGYDVEKNNSRIK	P16403;P16402;P10412	3	3	3	2774.57	0	0.001086							High	7.31735							0
MQNDTAENETTEKEEKSESRQER	Q05682	2	1	1	2769.23	0	3.861e-12													High	5.74414	0
SPSLDVTVPEAELNLETPEISVGGKGK	Q09666	1	1	1	2766.44	0	1.17e-08													High	4.7423	0
PKRKAEGDAKGDKAKVKDEPQRRSA	P05204	1	1	1	2765.52	0	0.0002161	High		3.04935												0
TNVKAAWGKVGAHAGEYGAEALERMF	P69905	1	1	1	2763.36	0	4.41e-08													High	5.53033	0
DAHKSEVAHRFKDLGEENFKALVL	P02768	6	1	1	2753.44	0	1.999e-06		High		3.0416	High	4.28156	High	4.79963	High	3.5549			High	4.87373	0
ADIDVSGPSVDTDAPDLDIEGPEGKLK	Q09666	1	1	1	2753.34	0	1.018e-12													High	4.76368	0
HLVYESDQNKDGKLTKEEIVDKY	O43852	1	1	1	2751.39	0	4.945e-06													High	3.73355	0
KTETQEKNTLPTKETIEQEKRSE	P63313	3	1	1	2747.41	0	0.05949	High		4.53134				High	5.68536							0
TVVQPSVGAAAGPVVPPCPGRIRHFKV	P02765	3	1	1	2739.53	0	7.513e-05							High	4.49764	High	5.87644					0
TKPKESARQDEGKEEEPEADQEHA	P17677	2	1	1	2738.26	0	0.004961	High		2.27301		High	2.34697									0
QIRETSLDTKSVSEGHLKRNIVVK	P14136	3	1	1	2737.53	0	1.292e-09	High		3.84345		High	4.75296									0
NAESNAELKGLDVDSLVIEHIQVNK	P18621	1	1	1	2735.41	0.004	0.04857													High	2.79976	0
LKKTETQEKNPLPSKETIEQEKQ	P62328	2	1	1	2726.46	0	0.04714							High	6.94651							0
VNGDASPAAAESGAKEELQANGSAPAADK	P29966	1	1	1	2726.3	0	4.453e-12													High	3.9612	0
AQDVQQSTDADTEGHSPKAQPGSTDR	Q4ZHG4	1	1	1	2726.23	0	2.775e-07													High	2.80111	0
RNIVVKTVEMRDGEVIKESKQEH	P14136	2	1	1	2724.45	0	2.139e-06									High	7.5691					0
HAKRVTIMPKDIQLARRIRGERA	Q6NXT2	5	5	1	2715.58	0	0.1685							High	4.22264							0
VKTVEMRDGEVIKESKQEHKDVM	P14136	2	1	1	2715.38	0	0.02497		High		2.50788											0
SSLNLRETNLDSLPLVDTHSKRTL	P08670	4	1	1	2709.46	0	1.335e-06	High		5.04335						High	5.9729					0
RSYVSSGEMMVGGLAPGRRLGPGTRL	P14136	1	1	1	2704.41	0	7.03e-06					High	4.14436									0
TETQEKNPLPSKETIEQEKQAGES	P62328	6	1	1	2701.33	0	8.511e-11	High	High	3.37048	2.5894					High	3.79789	High	7.05734	High	7.67664	0
IVVKTVEMRDGEVIKESKQEHKD	P14136	5	1	1	2697.43	0	2.75e-09					High	6.27608									0
NIVVKTVEMRDGEVIKESKQEHK	P14136	2	1	1	2696.45	0	0.01137					High	2.04643			High	2.68209					0
PKRKAEGDAKGDKAKVKDEPQRRS	P05204	3	1	1	2694.48	0	0.000406	High		4.051												0
SAAPAAGEEPSKEEGEPKKTEAPAAPAA	P80723	1	1	1	2691.32	0	0.05519											High	2.86973			0
KGPVREGDVLTLLESEREARRLR	P62857	1	1	1	2679.5	0	0.1156							High	3.59996							0
KATEMVEVGADDDEGGAERGEAGDLR	Q6NZI2	1	1	1	2677.21	0	6.834e-09													High	4.74483	0
DAHTKEIDLVNRDPKHLNDDVVK	Q03135	1	1	1	2671.38	0	1.526e-07													High	4.5276	0
AQGGVLPNIQAVLLPKKTESHHKAK	P0C0S8	1	7	1	2664.53	0	0.01908							High	4.28803							0
IKTVETRDGQVINETSQHHDDLE	P08670	41	1	1	2664.29	0	7.323e-08	High	High	8.69825	2.09067	High	6.99638	High	6.94948	High	8.52697	High	5.27941	High	6.61706	0
FESFGDLSTPDAVMGNPKVKAHGKK	P68871	1	1	1	2660.35	0	0.2056							High	4.54406							0
ISSGKSDDEVDDPAVELKQFGVAPF	P12111	1	1	1	2650.28	0.002	0.01395													High	4.3278	0
SKPDEPGKAGETPSEEKKGEGDAATE	P17677	2	1	1	2644.23	0	0.01223					High	2.7115					High	2.66324			0
SLVEPKEDEKGDDVDDPENQNSAL	Q02952	1	1	1	2643.21	0.004	0.04828													High	3.61383	0
SYVSSGEMMVGGLAPGRRLGPGTRLS	P14136	2	1	1	2635.35	0	0.0002838	High		2.06196		High	1.91664									0
LTELEPAPHAGLLALPKDDIPGLPR	Q9NP70	1	1	1	2633.47	0.006	0.3472							High	3.353							0
GKKPDIDITGPKVDINAPDVEVQGK	Q09666	1	1	1	2633.43	0.004	0.07955													High	2.79763	0
AIGGGLSSVGGGSSTIKYTTTSSSSRKS	P02538	1	2	1	2633.34	0	0.1267							High	3.04103							0
KREEAPSLRPAPPPISGGGYRARPA	P02675	1	1	1	2630.43	0	0.1799							High	3.56512							0
VKQADSGSSEEKQLYNKYPDAVAT	P10451	1	1	1	2628.28	0	0.1634							High	4.25848							0
FLSFPTTKTYFPHFDLSHGSAQV	P69905	1	1	1	2627.3	0.008	0.1706													High	2.80328	0
DIKPQLELIEDEEKLKETEPVE	P46821	4	1	1	2624.36	0	9.066e-14	High		5.54367		High	6.16093			High	5.35737	High	4.54526			0
RLKTDNAGDQHGGGGGGGGGAGAAGGGGGGEN	P14866	1	1	1	2623.16	0	4.566e-07													High	3.38505	0
SEEGETEEDDQDSSHSSVTTVKAR	Q5JTV8	1	1	1	2623.13	0	5.997e-09													High	3.35818	0
TNVKAAWGKVGAHAGEYGAEALERM	P69905	1	1	1	2616.31	0	2.208e-07													High	6.25968	0
TDDRKEGMTAFVEKRKANFKDQ	P30084	1	1	1	2614.3	0	0.1842							High	4.52659							0
KKTETQEKNPLPSKETIEQEKQ	P62328	2	1	1	2613.38	0	0.01612							High	7.02235							0
KTETQEKNPLPSKETIEQEKQAG	P62328	5	1	1	2613.34	0	2.091e-08	High		4.58451		High	5.40578	High	4.44142			High	4.13081	High	4.70186	0
MQNDTAENETTEKEEKSESRQE	Q05682	1	1	1	2613.13	0	0.003561													High	2.56961	0
PKRKAEGDAKGDKAKVKDEPQRR	P05204	29	1	1	2607.44	0	5.113e-07	High		5.15316		High	3.03953			High	3.45702					0
AYRGVGDDQLGEESEERDDHLLP	P20645	1	1	1	2600.19	0	0.07034							High	3.59974							0
LKKTETQEKNPLPSKETIEQEK	P62328	1	1	1	2598.4	0	0.05019							High	4.49443							0
AVVVKKIETRDGKLVSESSDVLPK	P05787	4	1	1	2597.49	0	0.04321	High		6.52034				High	7.22824							0
GDVDVSLPKVEGDLKGPEVDIKGPK	Q09666	1	1	1	2591.4	0	3.348e-06													High	3.71751	0
RSYVSSGEMMVGGLAPGRRLGPGTR	P14136	6	1	1	2591.33	0	5.763e-07	High		5.99758		High	6.34992			High	6.54075					0
SVSSSSYRRMFGGPGTASRPSSSRS	P08670	2	1	1	2591.24	0	0.00135					High	3.24359	High	3.56927							0
VVKTVEMRDGEVIKESKQEHKD	P14136	5	1	1	2584.34	0	2.513e-07	High		3.97933		High	4.55748									0
VGAHAGEYGAEALERMFLSFPTTK	P69905	1	1	1	2582.27	0	7.821e-09													High	7.36019	0
ADLDVSGPKVDIDVPDVNIEGPEGK	Q09666	1	1	1	2578.29	0	2.301e-06													High	5.1826	0
DSHSLTTNIMEILRGDFSSANNR	P02671	1	1	1	2578.23	0.003	0.01897													High	3.47802	0
YDNEFGYSNRVVDLMAHMASKE	P04406	3	1	1	2576.15	0	1.56e-13		High		3.47353					High	4.26743			High	5.1572	0
VSSGEMMVGGLAPGRRLGPGTRLSLA	P14136	2	1	1	2569.37	0	0.06697					High	1.43225			High	1.73025					0
HKSEVAHRFKDLGEENFKALVL	P02768	1	1	1	2567.38	0.003	0.04073													High	3.02689	0
MQKEITALAPSTMKIKIIAPPER	P63267;P60709	1	6	2	2566.44	0	5.04e-09													High	5.228	0
AESADAALQGDPALQDAGDSSRKEY	P04921	1	1	1	2565.18	0	6.446e-07													High	4.9257	0
ADLDVSGPKVDVDVPDVNIEGPDAK	Q09666	2	1	1	2564.28	0	7.432e-05													High	4.51212	0
LVTLAAHLPAEFTPAVHASLDKFL	P69905	1	1	1	2561.42	0	0.008746													High	2.83481	0
KTETQEKNPLPSKETIEQEKQA	P62328	2	1	1	2556.32	0	0.0008809					High	5.18589	High	6.25051							0
RAAEDDEDDDVDTKKQKTDEDD	P06454	7	1	1	2553.08	0	0.0003459	High		3.25984		High	3.43236			High	3.76456	High	4.9178	High	3.32213	0
RSTITSREIQTAVRLLLPGELAK	Q99877;P58876;Q5QNW6;O60814	1	13	4	2552.49	0.003	0.02117													High	2.88776	0
ADIDVSGPKVDVEVPDVSLEGPEGK	Q09666	1	1	1	2551.28	0	2.184e-05													High	4.05202	0
KTVETRDGQVINETSQHHDDLE	P08670	16	1	1	2551.21	0	9.225e-10	High		8.19081		High	5.51444	High	4.06528	High	7.4095			High	5.74599	0
EGHLKRNIVVKTVEMRDGEVIK	P14136	2	1	1	2550.42	0	0.02221	High		3.30225						High	3.83387					0
SYVSSGEMMVGGLAPGRRLGPGTRL	P14136	1	1	1	2548.31	0	0.0001108					High	2.00987									0
SATEPGPPGYSVSPAVPGRSPGLPIR	Q14CZ8	1	1	1	2546.35	0	0.05191											High	2.09182			0
AIGGGLSSVGGGSSTIKYTTTSSSSRK	P02538	2	2	1	2546.31	0	0.1158							High	5.41561							0
DAHKSEVAHRFKDLGEENFKAL	P02768	2	1	1	2541.29	0	0.2355							High	4.99687							0
ADVDVSGPKVDVEVPDVSLEGPEGK	Q09666	1	1	1	2537.27	0	0.001852													High	3.83511	0
RTKVMDVHDGKVVSTHEQVLRT	P02533	1	1	1	2535.35	0	0.04978							High	5.67741							0
ATGGGLSSVGGGSSTIKYTTTSSSSRK	P04259	1	1	1	2534.27	0.004	0.3357							High	1.82357							0
SGVSLAALKKALAAAGYDVEKNNSR	P16403;P16402;P10412	3	3	3	2533.38	0	1.24e-14							High	6.54378					High	7.94908	0
KTETQEKNTLPTKETIEQEKR	P63313	1	1	1	2531.34	0	0.04733							High	4.67639							0
GESLGIKHEEAPGHRPTTNPNASK	P21291	4	1	1	2527.27	0	3.323e-08													High	4.7681	0
FYMVGPIEEAVAKADKLAEEHSS	P06576	2	1	1	2521.23	0	0.005588							High	2.67776					High	3.29062	0
GLGVGFGSGGGSSSSVKFVSTTSSSRK	P13647	2	1	1	2520.28	0	0.1772							High	4.27306							0
KAEGGGGGGRPGAPAAGDGKTEQKGGDK	Q00839	1	1	1	2510.24	0	1.547e-11													High	4.23374	0
KRVTIMPKDIQLARRIRGERA	Q6NXT2	1	5	1	2507.48	0	0.1364							High	3.22458							0
SVSSSSYRRMFGGPGTASRPSSSR	P08670	9	1	1	2504.21	0	0.0001974	High		5.49045		High	3.88441	High	4.42703	High	4.03392					0
LMIEQNTKSPLFMGKVVNPTQK	P01009	3	1	1	2503.35	0	1.617e-05		High		3.14165									High	2.79616	0
AYRGVGDDQLGEESEERDDHLL	P20645	1	1	1	2503.14	0.006	0.3902							High	3.11596							0
VSSGEMMVGGLAPGRRLGPGTRLSL	P14136	1	1	1	2498.33	0	0.01186					High	1.53508									0
SSLNLRETNLDSLPLVDTHSKR	P08670	3	1	1	2495.33	0	2.773e-07	High		6.01471						High	2.34836					0
FSNLQIRETSLDTKSVSEGHLK	P14136	5	1	1	2489.3	0	5.456e-12	High		6.50168		High	6.64237			High	6.47449					0
TVEMRDGEVIKESKQEHKDVM	P14136	46	1	1	2488.22	0	2.115e-07	High	High	6.33098	4.07539	High	6.21544			High	5.79232	High	5.02555			0
KTETQEKNPLPSKETIEQEKQ	P62328	11	1	1	2485.28	0	5.745e-08	High		5.14827		High	6.51285	High	5.46988					High	5.63419	0
VKTVEMRDGEVIKESKQEHKD	P14136	5	1	1	2485.27	0	6.495e-06					High	3.39568									0
TETQEKNPLPSKETIEQEKQAG	P62328	1	1	1	2485.25	0.008	0.1988													High	3.04039	0
KDYEEVGVDSVEGEGEEEGEEY	P68363	1	2	1	2477	0	1.717e-07									High	5.77724					0
TLVTRTQGTKIASDGLKGRVFEV	P61247	1	1	1	2476.39	0	0.2341							High	4.09603							0
IGGGLSSVGGGSSTIKYTTTSSSSRK	P02538	1	2	1	2475.28	0	0.09303							High	3.27897							0
TQEKNPLPSKETIEQEKQAGES	P62328	2	1	1	2471.23	0	0.001074	High		3.39331								High	6.06282			0
PKRKAEGDAKGDKAKVKDEPQR	P05204	15	1	1	2451.35	0	3.121e-08	High		5.43349		High	3.09394			High	3.86885					0
TNPPVIQEEKPKKKKKAQEDL	P30101	1	1	1	2448.38	0.008	0.1597													High	1.36393	0
LVTLAAHLPAEFTPAVHASLDKF	P69905	2	1	1	2448.33	0	1.888e-15							High	3.49046					High	5.27675	0
AGKHVPRAVFVDLEPTVIDEVR	P68363	3	3	1	2447.34	0	2.068e-08	High		3.54555		High	3.67359			High	3.45061					0
SQFQESDDADEDYGRDSGPPTK	Q9H1E3	1	1	1	2444.01	0	1.073e-05													High	4.33142	0
EKPKEVAENQQNQSSDPEEEK	O43491	1	1	1	2443.13	0	0.006344													High	2.30001	0
SYVSSGEMMVGGLAPGRRLGPGTR	P14136	2	1	1	2435.23	0	9.472e-08					High	3.92788			High	3.76775					0
PRKIEEIKDFLLTARRKDAK	P63173	1	1	1	2427.42	0	0.0181							High	4.84869							0
SSAPKRHNKTDQTQETQKPNQ	Q9NRM1	1	1	1	2423.2	0.008	0.2368									High	2.47516					0
TVETRDGQVINETSQHHDDLE	P08670	16	1	1	2423.12	0	3.179e-16	High		5.79248		High	5.71847	High	6.12886	High	6.41143	High	2.36454	High	6.56742	0
IKTVETRDGQVINETSQHHDD	P08670	2	1	1	2422.16	0	1.735e-08					High	4.72797									0
LIKTVETRDGQVINETSQHHD	P08670	1	1	1	2420.22	0	7.735e-11					High	5.70007									0
MPKFSMPGFKAEGPEVDVNLPK	Q09666	1	1	1	2418.22	0	1.21e-14													High	5.62988	0
AIGGGLSSVGGGSSTIKYTTTSSSSR	P02538	1	2	1	2418.21	0	0.0531							High	6.39582							0
VEGGDAGNREDQINRLIRRMN	P18124	1	1	1	2413.22	0.004	0.06503													High	2.4351	0
DNEFGYSNRVVDLMAHMASKE	P04406	1	1	1	2413.1	0.004	0.09387													High	2.03468	0
KPAPEKKPAEKKPTTEEKKPAA	P36578	4	1	1	2403.36	0	0.002776	High		3.02714				High	1.80276							0
AAEDDEDDDVDTKKQKTDEDD	P06454	1	1	1	2396.98	0	1.4e-08													High	2.52458	0
GLGVGFGSGGGSSSSVKFVSTTSSSR	P13647	1	1	1	2392.17	0	0.07488							High	4.96609							0
SYVTTSTRTYSLGSALRPSTSR	P08670	7	1	1	2391.23	0	1.604e-06	High		4.54893		High	3.67505	High	4.25644	High	5.03391					0
MIEQNTKSPLFMGKVVNPTQK	P01009	1	1	1	2390.26	0	4.273e-06		High		3.28107											0
VEMRDGEVIKESKQEHKDVM	P14136	11	1	1	2387.17	0	2.499e-06	High	High	5.41662	1.96703	High	3.46565			High	5.59581					0
KTVEMRDGEVIKESKQEHKD	P14136	2	1	1	2386.21	0	0.0009534	High		2.53331		High	2.90966									0
VSSGEMMVGGLAPGRRLGPGTRLS	P14136	1	1	1	2385.25	0.003	0.1167					High	1.36466									0
SGEMMVGGLAPGRRLGPGTRLSLA	P14136	2	1	1	2383.27	0	0.04167					High	2.86778			High	3.06508					0
RKAEGDAKGDKAKVKDEPQRR	P05204	1	1	1	2382.29	0.005	0.04309	High		2.70469												0
TLLIKTVETRDGQVINETSQH	P08670	1	1	1	2382.27	0	3.994e-11													High	4.12796	0
LKQAWFIENEEQEYVQTVK	P04083	1	1	1	2382.2	0	4.312e-20					High	7.55666									0
RVTIMPKDIQLARRIRGERA	Q6NXT2	1	5	1	2379.39	0.006	0.3848							High	2.43302							0
TKVMDVHDGKVVSTHEQVLRT	P02533	2	1	1	2379.25	0	0.06337							High	5.59565							0
SGVSLAALKKALAAAGYDVEKNNS	P16403;P16402;P10412	1	3	3	2377.27	0	0.005344													High	3.30018	0
AIVEALNGKEVAAQVKAPLVLKD	Q99497	1	1	1	2376.39	0	0.003969													High	1.2911	0
KTETQEKNTLPTKETIEQEK	P63313	2	1	1	2375.24	0	3.359e-07							High	4.80864					High	5.859	0
YMVGPIEEAVAKADKLAEEHSS	P06576	1	1	1	2374.16	0.006	0.4065							High	3.17252							0
QEKNPLPSKETIEQEKQAGES	P62328	3	1	1	2370.19	0	0.1077											High	4.50231			0
NDKSEEEQSSSSVKKDETNVK	P07910	1	1	1	2368.11	0.002	0.0146													High	1.72159	0
ASASGSGAQVGGPISSGSSASSVTVTR	P02545	1	1	1	2365.17	0	5.347e-10													High	6.07492	0
GGGLSSVGGGSSTIKYTTTSSSSRK	P02538;P04259	1	3	2	2362.19	0	0.08647							High	3.6927							0
FSNLQIRETSLDTKSVSEGHL	P14136	2	1	1	2361.2	0	2.577e-05	High		3.88472		High	4.46636									0
KTETQEKNPLPSKETIEQEK	P62328	12	1	1	2357.23	0	3.98e-09	High		6.30439		High	6.66233	High	5.54426					High	6.68798	0
TETQEKNPLPSKETIEQEKQ	P62328	3	1	1	2357.19	0	3.338e-13					High	3.83413							High	5.76947	0
TVEMRDGEVIKESKQEHKDV	P14136	13	1	1	2357.18	0	1.11e-06	High		1.57623		High	5.19416			High	5.56391					0
MQNDTAENETTEKEEKSESR	Q05682	1	1	1	2356.03	0	3.011e-06													High	2.01564	0
SVSEGHLKRNIVVKTVEMRDG	P14136	1	1	1	2354.26	0	0.0004374									High	4.58182					0
TDVDVSLPKVEGDLKGPEIDVK	Q09666	1	1	1	2353.25	0.003	0.0349													High	2.90026	0
DLFVGSQATDFGEALVRHDEF	O43852	1	1	1	2353.11	0.003	0.01751													High	2.63187	0
AAQLAIRVTNPNARLRSEENE	P62910	1	1	1	2352.25	0	0.001891													High	2.04573	0
HQGVMVGMGQKDSYVGDEAQSK	P63267;P60709	2	6	2	2351.08	0	9.295e-15													High	7.09429	0
YVSSGEMMVGGLAPGRRLGPGTR	P14136	1	1	1	2348.2	0.001	0.06552					High	1.59956									0
SVSSSSYRRMFGGPGTASRPSSS	P08670	3	1	1	2348.11	0	0.1009	High		3.75323		High	3.8312	High	4.35507							0
SDMALVKDMELPTEKEVALVK	P27816	1	1	1	2346.22	0	4.265e-05									High	4.38227					0
FTSKGLFRAAVPSGASTGIYEAL	P06733	1	1	1	2343.24	0	0.2445							High	2.70547							0
SNLQIRETSLDTKSVSEGHLK	P14136	5	1	1	2342.23	0	1.357e-07	High		4.925		High	4.76217			High	4.58799					0
ETSLDTKSVSEGHLKRNIVVK	P14136	2	1	1	2340.29	0	1.01e-05					High	2.67214									0
SSLNLRETNLDSLPLVDTHSK	P08670	3	1	1	2339.22	0	1.806e-10	High		6.14005		High	6.18067									0
RNIVVKTVEMRDGEVIKESK	P14136	9	1	1	2330.29	0	4.183e-06					High	6.66443			High	7.16672					0
IGGLAMACHDSFLKAVPSQKRT	P31949	1	1	1	2330.21	0	0.1684							High	3.00329							0
VQHKFVEEIIEETKVEDEK	P07197	1	1	1	2329.19	0	0.0003581											High	6.57616			0
VKKIETRDGKLVSESSDVLPK	P05787	2	1	1	2328.32	0	0.08121							High	5.89833							0
KESSETPDQFMTADETRNLQ	P16070	3	1	1	2327.05	0	1.081e-06		High		2.3309	High	3.89801			High	3.81745					0
AVGVIKAVDKKAAGAGKVTKSAQK	P68104	1	2	1	2325.4	0.006	0.3591							High	2.15598							0
DVGTDEEEETAKESTAEKDEL	P14625	1	1	1	2325.02	0	2.433e-09													High	2.85939	0
VETRDGQVINETSQHHDDLE	P08670	6	1	1	2322.06	0	0.0006528	High		5.6689		High	4.44679	High	4.36462	High	5.49569			High	5.22128	0
IKGDVPSVGLEGPDVDLQGPEAK	Q09666	1	1	1	2320.21	0	8.318e-09													High	6.66378	0
SLKELQEMDKDDESLIKYK	P52566	1	1	1	2312.17	0	3.198e-11													High	6.92973	0
RKATGPPVSELITKAVAASKER	P16401	1	1	1	2309.33	0	0.005887							High	7.03818							0
RTIVEEVQDGKVISSREQVH	Q04695	1	1	1	2309.23	0	0.09301							High	6.12748							0
IKTVETRDGQVINETSQHHD	P08670	5	1	1	2307.14	0	0.0001548	High		5.32249		High	5.31332									0
KGAGDGSDEEVDGKADGAEAKPAE	P35579	1	1	1	2303.03	0	1.944e-13													High	5.34168	0
QIRETSLDTKSVSEGHLKRN	P14136	1	1	1	2298.22	0	0.0002452	High		4.25046												0
AEPPKAPEQEQAAPGPAAGGEAPK	P80723	2	1	1	2298.14	0	2.117e-07											High	4.76789	High	4.95866	0
SVSEGHLKRNIVVKTVEMRD	P14136	2	1	1	2297.24	0	2.216e-06	High		3.0972		High	2.91549									0
RKASGPPVSELITKAVAASKER	P16403;P16402;P10412	4	3	3	2295.32	0	0.0001066					High	7.23382	High	8.09246					High	7.91275	0
PKRKAEGDAKGDKAKVKDEPQ	P05204	1	1	1	2295.25	0	0.1741											High	2.8703			0
GDVDVSAPKLEGELKGPELDVK	Q09666	1	1	1	2295.21	0.004	0.09279													High	3.19469	0
VDADRLDLEELSKDEASEME	O15061	2	1	1	2294.04	0	0.0001122	High		2.34401		High	3.51918									0
MDVHDGKVVSTHEQVLRTKN	P02533	1	1	1	2293.17	0	0.2202							High	3.08095							0
EEVSGNVSPGTRREYHTEKL	P02671	1	1	1	2288.13	0.006	0.401							High	1.49657							0
EMRDGEVIKESKQEHKDVM	P14136	38	1	1	2288.11	0	2.757e-05	High	High	6.76142	5.73557	High	6.38966			High	6.78151	High	5.65185			0
KLYDIDVAKVNTLIRPDGEK	P62750	1	1	1	2287.27	0	1.605e-06													High	4.92548	0
NPAENGDAKTDQAQKAEGAGDAK	P05204	1	1	1	2286.06	0.003	0.03795	High		2.50319												0
ESARQDEGKEEEPEADQEHA	P17677	1	1	1	2283.97	0	0.02756					High	2.71435									0
PKRKVSSAEGAAKEEPKRRSA	P05114	1	1	1	2282.27	0.006	0.08132	High		2.61493												0
TKVMDVHDGKVVSTHEQVLR	P02533	2	1	1	2278.2	0	0.1303							High	4.11076							0
RSYVSSGEMMVGGLAPGRRLGP	P14136	1	1	1	2277.16	0	5.761e-15					High	5.12528									0
AKNLQEAEEWYKSKYADLS	P41219	1	1	1	2273.1	0	0.009304									High	3.65945					0
TAVVVGTITDDVRVQEVPKLK	Q07020	1	1	1	2267.3	0	3.235e-06													High	3.41902	0
TFESRAQLGGPEAAKSDETAAK	P04792	2	1	1	2264.12	0	0.006							High	7.54834							0
SVSSSSYRRMFGGPGTASRPSS	P08670	1	1	1	2261.08	0	0.004159					High	3.48237									0
TVEMRDGEVIKESKQEHKD	P14136	41	1	1	2258.11	0	1.24e-08	High		3.34075		High	5.25227			High	4.29866	High	2.78			0
GIKEEIKEPENINAALQETE	Q9NQC3	1	1	1	2255.13	0.004	0.182											High	3.70581			0
IEGGDGHLFEDEEIKRLLQG	Q15063	1	1	1	2255.13	0.002	0.01627													High	2.20501	0
SYKMADEAGSEADHEGTHSTK	P02671	1	1	1	2250.97	0	2.269e-05													High	2.33496	0
RAAEEEDEADPKRQKTENGA	P20962	1	1	1	2244.05	0.004	0.07064													High	1.76729	0
ESDQNKDGKLTKEEIVDKY	O43852	1	1	1	2239.12	0	9.232e-05													High	3.30485	0
KREEAPSLRPAPPPISGGGYR	P02675	6	1	1	2235.21	0	6.343e-05							High	3.38864			High	3.96583	High	4.20479	0
GGGLSSVGGGSSTIKYTTTSSSSR	P02538;P04259	1	3	2	2234.09	0	0.02586							High	3.63427							0
TETQEKNPLPSKETIEQEK	P62328	6	1	1	2229.13	0	2.451e-08					High	3.61262	High	3.00141					High	6.1349	0
KAEGDAKGDKAKVKDEPQRR	P05204	3	1	1	2226.2	0	0.02274	High		2.35732						High	1.9888					0
HASLDKFLASVSTVLTSKYR	P69905	1	1	1	2223.21	0	4.541e-08													High	5.58347	0
ETRDGQVINETSQHHDDLE	P08670	3	1	1	2223	0	3.793e-05									High	2.34913			High	4.18425	0
VDIDVPDVNIEGPEGKLKGPK	Q09666	1	1	1	2219.19	0	1.637e-07													High	4.70399	0
SNLQIRETSLDTKSVSEGHL	P14136	1	1	1	2214.13	0	3.683e-07					High	3.79091									0
VDVDVPDVNIEGPDAKLKGPK	Q09666	1	1	1	2205.18	0	4.099e-08													High	4.41972	0
VSKEREEKVKETQEDKLE	O43491	2	1	1	2204.15	0	0.000795									High	3.25218	High	4.7196			0
RNIVVKTVEMRDGEVIKES	P14136	2	1	1	2202.2	0	0.0006291					High	5.17319			High	5.43588					0
SGEMMVGGLAPGRRLGPGTRLS	P14136	1	1	1	2199.15	0	0.0543									High	2.78347					0
SSSQSEESDLGEGGKKRESEA	Q9UKG1	1	1	1	2197	0.003	0.01881													High	1.55036	0
RETNLDSLPLVDTHSKRTL	P08670	4	1	1	2195.19	0	2.546e-08	High		3.25202		High	3.60534			High	3.14341			High	4.12218	0
AQLPETEIAPAKDVAPSTVKE	P27816	1	1	1	2194.16	0	0.01152					High	2.37459									0
GFGSGGGSSSSVKFVSTTSSSRK	P13647	1	1	1	2194.08	0.004	0.314							High	1.9443							0
KTVETRDGQVINETSQHHD	P08670	1	1	1	2194.05	0	4.463e-05	High		3.98404												0
VSSGEMMVGGLAPGRRLGPGTR	P14136	5	1	1	2185.14	0	1.237e-07	High		1.60818		High	4.47301			High	1.65801					0
QIRETSLDTKSVSEGHLKR	P14136	2	1	1	2184.17	0	1.041e-08	High		5.24523												0
ISSKEPRQQLVEVIGQLEE	O15061	1	1	1	2182.16	0.008	0.211					High	2.81262									0
EITALAPSTMKIKIIAPPER	P63267;P60709	1	6	2	2179.25	0	0.00154													High	3.27677	0
AARGEEKDKETKNAANASASK	P46821	4	1	1	2176.1	0	0.0001463	High		4.01264		High	3.38372			High	3.36607					0
EEVSGNVSPGTRREYHTEK	P02671	2	1	1	2175.05	0	0.002632													High	1.74395	0
NIVVKTVEMRDGEVIKESK	P14136	1	1	1	2174.18	0	3.388e-05									High	4.53797					0
ERIAGEASRLAHYNKRSTI	Q99877;P58876;Q5QNW6;O60814	1	13	4	2172.16	0	0.1773							High	2.39984							0
PAENGDAKTDQAQKAEGAGDAK	P05204	1	1	1	2172.02	0	0.04124									High	2.27402					0
KGEGDAATEQAAPQAPASSEEK	P17677	1	1	1	2172.01	0	5.302e-11					High	4.60037									0
ILKDKDSPETEENPAPEPR	Q14CZ8	1	1	1	2165.08	0	0.0003732											High	5.32372			0
WISKQEYDESGPSIVHRK	P60709	1	7	1	2159.09	0	0.2645							High	3.07132							0
MRDGEVIKESKQEHKDVM	P14136	22	1	1	2159.06	0	4.536e-06	High	High	6.44875	4.06871					High	8.01841	High	4.885			0
EMRDGEVIKESKQEHKDV	P14136	6	1	1	2157.06	0	0.0001192	High		4.03098						High	5.26029	High	3.53969			0
VEMRDGEVIKESKQEHKD	P14136	13	1	1	2157.06	0	2.187e-13	High		3.24449		High	5.93847									0
AGFAGDDAPRAVFPSIVGRPR	P63267;P60709	2	9	2	2156.14	0.003	0.01977							High	2.45805					High	2.15415	0
TAAKGEAAAERPGEAAVASSPSK	P29966	1	1	1	2156.11	0	0.006482													High	3.04095	0
SARQDEGKEEEPEADQEHA	P17677	4	1	1	2154.92	0	3.941e-09	High		3.42928		High	3.90221			High	3.45533	High	3.89447			0
KATGPPVSELITKAVAASKER	P16401	2	1	1	2153.23	0	0.002827							High	8.02319					High	7.6229	0
PTFKFEDPKFEVIEKPQA	P18859	2	1	1	2150.12	0	0.03812							High	5.3905			High	4.49577			0
VMDVHDGKVVSTHEQVLRT	P02533	1	1	1	2150.1	0	0.08227							High	4.23292							0
VDRGEEKKGKDQSGEVLSSV	P55087	2	1	1	2147.09	0	0.0774									High	3.65926	High	3.62989			0
TVEMRDGEVIKESKQEHK	P14136	14	1	1	2143.09	0	0.003858					High	3.103			High	3.51489					0
KASGPPVSELITKAVAASKER	P16403;P16402;P10412	12	3	3	2139.22	0	1.19655e-23	High		8.5542		High	9.06968	High	8.47604	High	8.28034			High	8.12122	0
FESFGDLSTPDAVMGNPKVK	P68871	1	1	1	2139.05	0	5.276e-07													High	5.45457	0
FGSGGGSSSSVKFVSTTSSSRK	P13647	1	1	1	2137.06	0	0.1035							High	3.10371							0
TFESRAQLGGPEAAKSDETAA	P04792	1	1	1	2136.02	0	0.04578							High	5.68199							0
AAHLPAEFTPAVHASLDKFL	P69905	3	1	1	2135.13	0	0.0001817							High	3.21165			High	3.62423	High	4.64234	0
LAAHLPAEFTPAVHASLDKF	P69905	1	1	1	2135.13	0	0.004124							High	6.08379							0
TRGGSTSYGTGSETESPRNPS	P02671	1	1	1	2127.96	0	0.02341											High	2.77906			0
GKKKEELLKQLDDLKVEL	P42766	1	1	1	2126.25	0	0.001683													High	5.21286	0
TIMPKDIQLARRIRGERA	Q6NXT2	1	5	1	2124.22	0.006	0.3448							High	1.55856							0
PKRKVSSAEGAAKEEPKRR	P05114	4	1	1	2124.2	0	2.531e-07	High		6.45442												0
TKVMDVHDGKVVSTHEQVL	P02533	1	1	1	2122.1	0.004	0.2993							High	3.52435							0
EIDLVNRDPKHLNDDVVK	Q03135	3	1	1	2119.11	0	5.628e-05													High	3.36565	0
VEVGADDDEGGAERGEAGDLR	Q6NZI2	1	1	1	2116.94	0	1.353e-09													High	4.01208	0
VLISSGKSDDEVDDPAVELK	P12111	1	1	1	2116.07	0	6.895e-16													High	6.31508	0
RNIVVKTVEMRDGEVIKE	P14136	3	1	1	2115.16	0	2.487e-05	High		6.10134		High	5.85041									0
KRNIVVKTVEMRDGEVIK	P14136	1	1	1	2114.22	0	9.597e-05									High	5.6386					0
PRKIEEIKDFLLTARRK	P63173	1	1	1	2113.26	0	0.03229							High	5.04818							0
IIDGVPVEITEKETREER	Q15063	1	1	1	2113.12	0	0.0004103													High	2.30743	0
KNPLPSKETIEQEKQAGES	P62328	5	1	1	2113.08	0	1.208e-07	High	High	5.79407	2.51393	High	3.9726			High	5.39475	High	5.34371			0
KVDTTPNQGKKVEGAPTQGR	Q9P2E9	1	1	1	2111.13	0	0.00399													High	2.65152	0
KSIKKTPKKVKKPATAAGTK	P16402	2	1	1	2110.34	0.003	0.009663	High		3.27805												0
NTLPTKETIEQEKRSEIS	P63313	2	1	1	2103.1	0	0.0007267													High	3.39801	0
HKFVEEIIEETKVEDEK	P07197	1	1	1	2102.06	0	0.002532											High	5.39456			0
TETQEKNPLPSKETIEQE	P62328	1	1	1	2101.03	0.004	0.06682													High	3.04095	0
SVRKESKEETPEVTKVNH	P46821	3	1	1	2097.1	0	0.1116	High		3.46571		High	3.2057					High	4.72477			0
RETNLDSLPLVDTHSKRT	P08670	1	1	1	2082.1	0	5.668e-07					High	3.19194									0
QESDDADEDYGRDSGPPTK	Q9H1E3	1	1	1	2081.86	0	2.403e-05													High	2.51858	0
VGPIEEAVAKADKLAEEHSS	P06576	3	1	1	2080.06	0	0.115							High	5.17067					High	4.67404	0
KREEAPSLRPAPPPISGGGY	P02675	1	1	1	2079.1	0	9.778e-05													High	3.49651	0
KHHEEEIVHHKKEIER	Q9UII2	1	1	1	2078.09	0.003	0.03806													High	1.66772	0
ISWYDNEFGYSNRVVDL	P04406	1	1	1	2076.97	0	0.1845							High	2.73105							0
AGGDAGDAFDGFDFGDDPSDK	P02679	1	1	1	2075.8	0	9.793e-12													High	3.81266	0
KAEGDAKGDKAKVKDEPQR	P05204	1	1	1	2070.1	0	0.0001927	High		3.18813												0
KAEGAQNQGKKVEGAQNQGK	Q9P2E9	1	1	1	2070.07	0	9.693e-14													High	5.04974	0
VLLPKKTSATVGPKAPSGGKK	P16104	2	1	1	2064.25	0	0.1021							High	3.61466							0
FSMPGFKAEGPEVDVNLPK	Q09666	1	1	1	2062.03	0	8.667e-07													High	3.49837	0
LIAQDNETEKPIDSETKM	P43003	1	1	1	2062.01	0	0.000826											High	3.97541			0
IVVKTVEMRDGEVIKESK	P14136	1	1	1	2060.15	0	0.0006262									High	3.03676					0
EMRDGEVIKESKQEHKD	P14136	34	1	1	2057.99	0	1.476e-08	High		5.21516		High	5.45936			High	5.30951	High	5.45155			0
KTRVKLPSGSKKVISSANR	P62917	2	1	1	2056.24	0	0.1218							High	3.25177							0
IKTVETRDGQVINETSQH	P08670	1	1	1	2055.06	0	0.0007033													High	3.72523	0
DQDGGRKLTPQGQRDLDR	P39019	1	1	1	2055.04	0	0.002118													High	2.35014	0
APEPHVEEDDDDELDSKL	P52566	1	1	1	2052.89	0	2.984e-20													High	7.45708	0
RMPPPLPTRVDFSLAGALN	P14136	2	1	1	2052.11	0	2.517e-07					High	3.1379									0
NLRETNLDSLPLVDTHSK	P08670	1	1	1	2052.08	0	6.408e-11					High	4.68759									0
MDVHDGKVVSTHEQVLRT	P02533	1	1	1	2051.04	0	0.0989							High	5.93731							0
FSMPGFKGEGPEVDVNLPK	Q09666	1	1	1	2048.02	0	2.191e-06													High	3.75646	0
VAKPDLTAALKEIRTQYE	P14136	1	1	1	2046.13	0	0.05345									High	3.10512					0
KAEGAQNQGKKAEGAQNQGK	Q9P2E9	3	1	1	2042.04	0	1.515e-07					High	1.48512			High	2.48686			High	4.75822	0
VEMRDGEVIKESKQEHK	P14136	2	1	1	2042.04	0	0.003406					High	4.01935			High	2.99545					0
KAEGTPNQGKKAEGAQNQGK	Q9P2E9	1	1	1	2041.05	0	1.029e-10													High	4.42845	0
ETNLDSLPLVDTHSKRTL	P08670	1	1	1	2039.08	0	0.003919									High	3.03847					0
KPAPEKKPAEKKPTTEEK	P36578	1	1	1	2036.14	0	4.914e-05													High	1.93898	0
FSMPGFKGEGPDVDVNLPK	Q09666	1	1	1	2034	0	1.116e-05													High	3.27215	0
SLPQKSHGRTQDENPVVH	P02686	1	1	1	2029.03	0.004	0.1873											High	2.19519			0
QIRETSLDTKSVSEGHLK	P14136	21	1	1	2028.08	0	2.315e-13	High	High	4.58241	3.35755	High	5.94569			High	4.22497	High	4.77808			0
MRDGEVIKESKQEHKDV	P14136	1	1	1	2028.02	0	0.0009391									High	3.64709					0
RDGEVIKESKQEHKDVM	P14136	61	1	1	2028.02	0	4.967e-10	High	High	5.61116	5.15244	High	5.74689			High	5.6415	High	5.73274	High	3.57628	0
RETDPSPEERDKKPQES	Q9H4G0	1	1	1	2027.96	0	3.227e-05													High	2.42425	0
SVSEGHLKRNIVVKTVEM	P14136	1	1	1	2026.11	0	2.282e-07					High	5.0221									0
LGLTAPPGSKEAEVQAKQQA	O75368	2	1	1	2023.09	0	2.263e-05							High	2.01201					High	3.55345	0
AAHLPAEFTPAVHASLDKF	P69905	3	1	1	2022.05	0	0.0897							High	4.98207			High	4.45107	High	4.21804	0
SLKELQEMDKDDESLIK	P52566	1	1	1	2021.01	0	7.874e-05													High	3.27592	0
AKKPAGAAKKPKKATGAATPK	P10412	12	1	1	2020.24	0	2.1e-06	High		7.00409		High	4.66935									0
PEPAKSAPAPKKGSKKAVTK	O60814	7	5	1	2020.19	0	3.355e-05	High		6.3909		High	4.4737			High	4.74023					0
PFLDIQKRFGLNIDRW	O43920	1	1	1	2018.1	0	0.05469							High	4.55542							0
SLDKFLASVSTVLTSKYR	P69905	2	1	1	2015.12	0	2.548e-10													High	7.15072	0
TVEMRDGEVIKESKQEH	P14136	9	1	1	2014.99	0	2.891e-05					High	3.06567			High	4.07177					0
ISMPGFKGEGPEVDVNLPK	Q09666	1	1	1	2014.04	0	1.437e-05													High	2.64431	0
VEGGDAGNREDQINRLIR	P18124	1	1	1	2012.03	0.002	0.01396													High	1.21426	0
ASGPPVSELITKAVAASKER	P16403;P16402;P10412	3	3	3	2011.12	0	0.09505					High	2.33734	High	2.42772					High	2.41544	0
RKASGPPVSELITKAVAASK	P16403;P16402;P10412	1	3	3	2010.18	0	0.06896							High	5.69684							0
RSYVSSGEMMVGGLAPGRR	P14136	1	1	1	2010	0	2.442e-15					High	7.16913									0
FGSGGGSSSSVKFVSTTSSSR	P13647	1	1	1	2008.96	0	0.0497							High	3.16923							0
SSVPGVRLLQDSVDFSLAD	P08670	2	1	1	2005.02	0	2.947e-06	High		3.04599		High	2.55082									0
SGEMMVGGLAPGRRLGPGTR	P14136	3	1	1	1999.04	0	8.735e-06					High	3.68159			High	2.72699					0
NQGGYGGSSSSSSYGSGRRF	P09651	2	1	1	1997.87	0.003	0.08773	High		2.12158						High	2.21535					0
RQDEGKEEEPEADQEHA	P17677	1	1	1	1996.85	0	2.852e-07					High	4.06022									0
AKHAVSEGTKAVTKYTSSK	P58876;Q99877;Q5QNW6	3	12	3	1993.08	0	0.05429							High	4.69448							0
GKVGAHAGEYGAEALERMF	P69905	3	1	1	1992.97	0	0.0003864									High	4.148	High	5.46077	High	3.26677	0
RDGQVINETSQHHDDLE	P08670	10	1	1	1992.91	0	1.34e-05	High	High	5.12568	4.05919	High	6.42806	High	6.35191	High	5.98779	High	5.65511	High	5.34439	0
SAKPTKPAASDLPVPAEGVR	Q05682	1	1	1	1991.1	0	5.784e-06													High	4.53266	0
TLPTKETIEQEKRSEIS	P63313	1	1	1	1989.06	0.002	0.006878	High		2.06413												0
VLISSGKSDDEVDDPAVEL	P12111	1	1	1	1987.98	0	0.005883													High	3.22452	0
SAINEVVTREYTINIHK	P62899	1	1	1	1987.06	0	1.449e-07													High	3.48906	0
RNIVVKTVEMRDGEVIK	P14136	11	1	1	1986.12	0	3.596e-07	High		4.97446		High	5.13737			High	5.08398					0
NPLPSKETIEQEKQAGES	P62328	6	1	1	1984.99	0	1.433e-05	High	High	3.76325	2.43656	High	4.20876			High	4.85248	High	4.53544	High	4.78157	0
RETNLDSLPLVDTHSKR	P08670	2	1	1	1981.05	0	0.125							High	3.62743					High	3.49908	0
LPPEMEVALTEDQVPALK	P27816	1	1	1	1980.04	0	0.002755									High	3.01242					0
VGSQATDFGEALVRHDEF	O43852	1	1	1	1977.93	0	0.1525							High	2.34901							0
DDEVDVDGTVEEDLGKSR	P14625	1	1	1	1977.9	0	0.0008734													High	3.09375	0
ISKQEYDESGPSIVHRK	P60709	2	7	1	1973.01	0	0.0899							High	4.81873							0
KESSETPDQFMTADETR	P16070	1	1	1	1971.86	0	1.066e-10					High	4.29373									0
KGKADAGKEGNNPAENGDAK	P05204	1	1	1	1970.95	0	0.002089													High	2.97708	0
VDLEPTVIDEVRTGTYR	P68363	1	3	1	1963.02	0	0.001156													High	3.3179	0
VDRGEEKKGKDQSGEVLS	P55087	1	1	1	1961	0	0.1407											High	2.10958			0
FLSFPTTKTYFPHFDL	P69905	1	1	1	1960.99	0	0.0001737													High	2.2358	0
IAQDNETEKPIDSETKM	P43003	2	1	1	1948.92	0	0.0461		High		2.73469							High	3.54812			0
EMRDGEVIKESKQEHK	P14136	18	1	1	1942.97	0	0.001001	High		2.86173		High	3.72508			High	3.58127					0
KQAWFIENEEQEYVQ	P04083	1	1	1	1940.91	0	1.098e-06					High	4.64692									0
SGPPVSELITKAVAASKER	P16403;P16402;P10412	2	3	3	1940.08	0	0.001128							High	1.44648					High	1.57758	0
AYQKVVAGVANALAHKYH	P68871	1	2	1	1940.05	0	0.05298							High	5.22803							0
APEPHVEEDDDDELDSK	P52566	1	1	1	1939.81	0	4.991e-21													High	5.51882	0
VPPVQVSPLIKLGRYSAL	P56385	3	1	1	1937.16	0	0.08187							High	2.90263			High	2.58968	High	1.86653	0
VDIDVPDVNIEGPDAKLK	Q09666	1	1	1	1937.02	0.007	0.1171													High	2.55114	0
ISTGGGETEETLKKLLQE	Q15063	1	1	1	1933.01	0.004	0.0477													High	1.68298	0
SDGAPASDSKPGSSEAAPSSK	P80723	1	1	1	1932.89	0	5.379e-10													High	2.4642	0
MRDGEVIKESKQEHKD	P14136	50	1	1	1928.95	0	1.079e-08	High		4.51465		High	6.4807			High	4.65923	High	3.91431			0
VSETESRGSESGIFTNTK	P02671	1	1	1	1928.93	0	0.007106											High	4.18936			0
SARLSAKPAPPKPEPKPR	Q15651	1	1	1	1927.12	0.003	0.02407	High		3.52399												0
ASPKPAGLKESSDKVSRVA	P46821	1	1	1	1927.06	0.005	0.06202	High		2.32604												0
FSNLQIRETSLDTKSVS	P14136	2	1	1	1925	0	0.02574	High		2.33293						High	3.07807					0
VDVDVPDVNIEGPDAKLK	Q09666	1	1	1	1923.01	0.004	0.08617													High	2.46578	0
KHAVSEGTKAVTKYTSSK	P58876;Q99877;Q5QNW6	3	12	3	1922.04	0	0.237							High	2.50913							0
ASLGSLEGEAEAEASSPKGK	Q09666	1	1	1	1917.94	0.003	0.02999													High	1.63026	0
AVGVIKAVDKKAAGAGKVTK	P68104	1	2	1	1911.18	0	0.1805							High	2.75822							0
KAASGEAKPKAKKAGAAKAK	P10412;P16401	2	2	2	1911.16	0.003	0.01347	High		2.37669												0
SKPLAASPKPAGLKESSDK	P46821	1	1	1	1911.06	0	1.752e-05					High	2.77839									0
MPKDIQLARRIRGERA	Q6NXT2	1	5	1	1910.09	0.006	0.4211							High	1.13166							0
KHAVSEGTKAVTKYTSAK	O60814	1	3	1	1906.04	0.006	0.3867							High	1.87249							0
VGGGSSTIKYTTTSSSSRK	P02538;P04259	1	3	2	1903.98	0	0.1688							High	2.3486							0
ISSGKSDDEVDDPAVELK	P12111	1	1	1	1903.92	0	1.225e-16													High	5.5822	0
KTEAAATTRKPESNAVTK	P27816	1	1	1	1903.03	0	0.0003508					High	2.23711									0
NTLPTKETIEQEKRSE	P63313	2	1	1	1902.98	0	3.105e-06													High	3.54737	0
DQEIIEVDPDTKEMLK	P08708	1	1	1	1902.94	0	0.002508													High	3.03226	0
TDVKPKAAKEKTVKKET	P46821	3	1	1	1901.11	0	0.05778	High		3.48945		High	2.14328			High	2.34004					0
IRETSLDTKSVSEGHLK	P14136	9	1	1	1900.02	0	3.864e-09	High		5.91148		High	5.1818			High	5.34573	High	5.75792			0
SARLSAKPAPPKPEPKPK	P05204	2	1	1	1899.12	0	0.0005541	High		3.61225												0
GDAKGDKAKVKDEPQRR	P05204;O00479	2	2	2	1898.02	0	0.0772	High		1.68914						High	1.8433					0
VESDLKGPEVDIEGPEGK	Q09666	1	1	1	1897.94	0	7.249e-08													High	4.27318	0
VGGIKEDTEEHHLRDY	P09651;P22626	1	3	2	1897.91	0	0.003937													High	2.25066	0
RDGEVIKESKQEHKDV	P14136	40	1	1	1896.98	0	5.056e-05					High	4.53177			High	4.58372	High	3.16531			0
SRGPQGVEDGDRPQPSSK	Q96EY8	1	1	1	1896.92	0.002	0.01234													High	2.32872	0
DEEASGFIHEDHLREL	P24844	1	1	1	1896.87	0	0.0005715													High	3.12887	0
MQNDTAENETTEKEEK	Q05682	1	1	1	1896.82	0.003	0.02544													High	1.90482	0
SVSEGHLKRNIVVKTVE	P14136	1	1	1	1895.07	0	0.003445									High	3.52426					0
SPAPKPSDLRPGDVSSKR	Q05682	1	1	1	1894.01	0	9.85e-09													High	3.07313	0
LPTKETIEQEKRSEIS	P63313	2	1	1	1888.01	0	9.923e-05	High		4.03117												0
TEETEEREESTTGFDK	Q9Y2W1	1	1	1	1887.82	0	0.000775													High	3.13529	0
AEDGATPSPSNETPKKKK	P29966	1	1	1	1884.97	0	0.008213													High	1.89537	0
DEEATGTIQEDYLREL	P19105	1	2	1	1881.87	0	9.119e-06													High	4.4088	0
AGDDAPRAVFPSIVGRPR	P63267;P60709	2	9	2	1881.01	0	0.0003888													High	3.68622	0
HLVYESDQNKDGKLTK	O43852	1	1	1	1874.96	0	0.003039													High	2.62349	0
MADEAGSEADHEGTHSTK	P02671	2	1	1	1872.77	0	6.113e-05											High	4.10657			0
DGEVIKESKQEHKDVM	P14136	13	1	1	1871.92	0	0.03142	High	High	4.31108	2.25966	High	4.33789			High	4.31276	High	4.86089			0
PLPSKETIEQEKQAGES	P62328	1	1	1	1870.95	0	0.06136											High	2.31684			0
YQKVVAGVANALAHKYH	P68871	6	2	1	1869.01	0	1.628e-12							High	4.89798	High	4.6629	High	4.44741	High	5.32143	0
KASGPPVSELITKAVAASK	P16403;P16402;P10412	2	3	3	1854.07	0	2.405e-14							High	6.41899					High	6.61801	0
RSYVSSGEMMVGGLAPGR	P14136	1	1	1	1853.9	0.001	0.03504					High	2.68696									0
SRKESYSVYVYKVLK	P58876;Q5QNW6;O60814;Q99877	1	9	4	1849.02	0	5.356e-08													High	7.01736	0
DLDADDINSRVEMKPK	P29972	1	1	1	1845.9	0	0.001378													High	3.32558	0
GKVGAHAGEYGAEALERM	P69905	5	1	1	1845.89	0	1.93e-05							High	6.01163			High	6.51716	High	2.79722	0
SGAQASSTPLSPTRITRL	P02545	1	1	1	1843.01	0	0.00536													High	2.69827	0
HEEAPGHRPTTNPNASK	P21291	1	1	1	1842.89	0	2.293e-07													High	4.38831	0
AGFKETRASERAEMME	P14136	1	1	1	1842.85	0	0.002646									High	3.79022					0
QDEGKEEEPEADQEHA	P17677	1	1	1	1840.75	0	6.422e-08					High	3.42078									0
DGQVINETSQHHDDLE	P08670	7	1	1	1836.8	0	3.996e-07	High		2.67506		High	4.24901			High	2.32192			High	3.90326	0
TYFPHFDLSHGSAQVK	P69905	2	1	1	1833.89	0	0.005013													High	2.41346	0
KKEVDATSPAPSTSSTVK	Q16666	1	1	1	1832.97	0.003	0.02545													High	2.07539	0
LVRYTKKVPQVSTPTL	P02768	1	1	1	1830.09	0.004	0.2793							High	2.79648							0
SETESRGSESGIFTNTK	P02671	1	1	1	1829.86	0	1.061e-13													High	4.71835	0
LGLTAPPGSKEAEVQAKQ	O75368	1	1	1	1823.99	0.008	0.1697													High	2.40795	0
ESSSHHPGIAEFPSRGK	P02671	1	1	1	1822.89	0	0.0003472													High	2.39486	0
KPAGAAKKPKKATGAATPK	P10412	15	1	1	1821.1	0	0.001526	High		3.94022		High	2.81111									0
STGGGETEETLKKLLQE	Q15063	1	1	1	1819.93	0	0.001026													High	1.49678	0
KPAGAAKKPKKVAGAATPK	P16402	2	1	1	1819.13	0	0.004219	High		3.616												0
IAQDNETEKPIDSETK	P43003	1	1	1	1817.88	0.004	0.1407		High		1.45759											0
AAKPKVVKPKKAAPKKK	P16403	1	1	1	1817.23	0	0.1353											High	3.39521			0
EEVSGNVSPGTRREYH	P02671	1	1	1	1816.86	0.003	0.02163													High	1.43051	0
EMRDGEVIKESKQEH	P14136	3	1	1	1814.87	0	1.079e-05					High	3.82064			High	4.29573					0
MRDGEVIKESKQEHK	P14136	17	1	1	1813.93	0	0.0006181					High	3.04001			High	4.13984					0
SRSGGGGGGGLGSGGSIRSSY	P35527	1	1	1	1812.86	0	1.231e-07		High		4.07064											0
DKDSPETEENPAPEPR	Q14CZ8	2	1	1	1810.81	0	0.001896		High		2.1333							High	3.8525			0
RRMFGGPGTASRPSSSR	P08670	3	1	1	1806.91	0	9.41e-05	High		4.56442												0
KFEDPKFEVIEKPQA	P18859	1	1	1	1804.95	0	0.116							High	3.66913							0
KTVETRDGQVINETSQ	P08670	1	1	1	1804.9	0.003	0.03483	High		2.20574												0
VLLPKKTESHHKAKGK	P0C0S8	29	6	1	1801.08	0	0.07006							High	2.96552	High	2.68485	High	3.70929			0
MPGFKGEGPDVDVNLPK	Q09666	1	1	1	1799.9	0	3.146e-06													High	3.25524	0
WGKVNVDEVGGEALGRL	P68871	2	1	1	1798.95	0	0.02223							High	5.33331					High	4.22982	0
RDGEVIKESKQEHKD	P14136	46	1	1	1797.91	0	1.285e-11	High	High	6.02577	4.04014	High	6.7593			High	5.44024	High	5.36001			0
KPATSARKEVKLPGKGK	Q5SSJ5	1	1	1	1795.09	0	0.001806	High		2.9085												0
EEYGKIDTIEIITDR	P22626	1	1	1	1794.91	0	9.787e-08													High	3.60255	0
HAVSEGTKAVTKYTSSK	P58876;Q99877;Q5QNW6	2	12	3	1793.94	0	0.1018							High	4.95832					High	4.23645	0
EAWPSTDKTKREEVD	Q99217	1	1	1	1790.86	0	0.003557									High	1.82096					0
TLPTKETIEQEKRSE	P63313	3	1	1	1788.94	0	0.002346	High		2.15768		High	2.06088					High	1.83056			0
RETSLDTKSVSEGHLK	P14136	3	1	1	1786.93	0	1.383e-14	High		4.62536		High	4.87771			High	4.72439					0
GAVAEDGDELRTEPEAK	P27695	1	1	1	1786.85	0.003	0.02013													High	1.98925	0
GEAAAERPGEAAVASSPSK	P29966	1	1	1	1784.88	0	2.521e-14													High	4.97653	0
GADFLVTEVENGGSLGSK	P14618	1	1	1	1779.87	0	0.002215													High	3.123	0
GLDVDSLVIEHIQVNK	P18621	1	1	1	1778.96	0.002	0.01079													High	2.18909	0
SNLQIRETSLDTKSVS	P14136	2	1	1	1777.93	0	4.424e-05	High		6.29732						High	5.63041					0
ISSGKSDDEVDDPAVEL	P12111	1	1	1	1775.82	0	2.223e-05													High	2.80257	0
LPSKETIEQEKQAGES	P62328	1	1	1	1773.89	0	0.00193											High	4.07551			0
IRETSLDTKSVSEGHL	P14136	3	1	1	1771.92	0	9.645e-06									High	5.24327	High	4.42927			0
NPLPSKETIEQEKQAG	P62328	1	1	1	1768.92	0.002	0.01333													High	3.43685	0
ISMPDIDLNLKGPKVK	Q09666	1	1	1	1768	0	0.0001197													High	2.57727	0
GGPGTASRPSSSRSYVTT	P08670	2	1	1	1767.87	0	0.005104	High		2.86651						High	3.03845					0
PPPLPTRVDFSLAGALN	P14136	1	1	1	1764.97	0.001	0.03317					High	3.54838									0
QDNETEKPIDSETKM	P43003	2	1	1	1764.8	0	0.03384		High		3.72989							High	3.89948			0
EAGGAFGKREQAEEER	Q9UII2	1	1	1	1763.84	0	0.003384													High	2.05704	0
GDAKTDQAQKAEGAGDAK	P05204	2	1	1	1760.84	0.003	0.02406	High		4.04855												0
HVQESLQDEGAEPTGY	P15311	1	1	1	1759.79	0	6.968e-08													High	3.18166	0
ASPKPAGLKESSDKVSR	P46821	4	1	1	1756.96	0	5.184e-05	High		2.87175		High	2.33901			High	2.64772					0
GEVIKESKQEHKDVM	P14136	29	1	1	1756.89	0	0.003614	High	High	5.10558	2.22937	High	4.92705			High	4.301	High	5.37257			0
KAEDGATPSPSNETPKK	P29966	1	1	1	1756.88	0	0.01035											High	3.49279			0
PSKGPLQSVQVFGRKK	P62249	1	1	1	1756.03	0	0.1755							High	4.7942							0
KPAEKKPTTEEKKPAA	P36578	1	1	1	1752.99	0	3.402e-05													High	3.18751	0
EGHLKRNIVVKTVEM	P14136	1	1	1	1752.98	0	4.809e-05					High	4.18049									0
TFSNLQIRETSLDTK	P14136	3	1	1	1752.92	0	1.329e-05	High		1.87534		High	2.80423			High	2.74095					0
RDGQVINETSQHHDD	P08670	1	1	1	1750.78	0	1.431e-06													High	3.52916	0
AVVGVVAGGGRIDKPILK	P62917	2	1	1	1749.07	0	0.0004269													High	3.18874	0
SVRKESKEETPEVTK	P46821	1	1	1	1746.93	0	0.04582									High	3.30708					0
MADEAGSEADHEGTHST	P02671	1	1	1	1744.68	0	0.03305											High	3.42963			0
KGKADAGKDGNNPAKNR	O00479	1	1	1	1740.91	0.003	0.008704	High		2.24047												0
DGEVIKESKQEHKDV	P14136	3	1	1	1740.88	0	1.198e-06					High	3.93435			High	3.3678					0
IFIKPSVEPSAGHDEL	Q9HCN8	1	1	1	1738.9	0.006	0.3579							High	2.34802							0
FSNLQIRETSLDTKS	P14136	1	1	1	1738.9	0	0.001441					High	3.28277									0
SPAPKPSDLRPGDVSSK	Q05682	2	1	1	1737.92	0	2.585e-05													High	3.23277	0
RMFGGPGTASRPSSSRS	P08670	3	1	1	1737.85	0	7.929e-06	High		3.72831		High	4.02778									0
FLSFPTTKTYFPHF	P69905	4	1	1	1732.87	0	0.02982							High	2.59352	High	2.04905	High	2.41296	High	2.3802	0
ASLGSLEGEAEAEASSPK	Q09666	1	1	1	1732.83	0	4.434e-13													High	3.89204	0
DMRQTVAVGVIKAVDK	P68104	2	2	1	1729.97	0	5.645e-16							High	5.18183					High	5.80561	0
KTETQEKNPLPSKET	P62328	2	1	1	1729.9	0	0.003058					High	3.16089							High	3.18646	0
EDYVQSMDVAAFNKI	P24534	1	1	1	1729.81	0	1.252e-05													High	4.04903	0
GEKLNGTDPEDVIRNA	P19105;P24844	1	3	2	1727.86	0	1.795e-07													High	5.43477	0
KVVVSPTKKVAVATPAK	P19338	1	1	1	1723.09	0	0.01231							High	4.1321							0
NDYFVVHMKQKGKK	P60903	1	1	1	1721.92	0.006	0.4032							High	1.97192							0
GQVINETSQHHDDLE	P08670	5	1	1	1721.77	0	0.01348					High	2.09552			High	2.47972	High	1.9499	High	2.43785	0
VDIDTPDIDIHGPEGK	Q09666	1	1	1	1720.84	0	1.402e-09													High	4.81672	0
IVVKTVEMRDGEVIK	P14136	1	1	1	1715.97	0.007	0.1778									High	2.10249					0
DASTLQSQKAEGTGDAK	O00479	2	1	1	1706.83	0	0.004147	High		2.98188						High	3.2833					0
DAKTDQAQKAEGAGDAK	P05204	1	1	1	1703.82	0.003	0.1352									High	1.75343					0
LLPKKTESHHKAKGK	P0C0S8	5	6	1	1702.01	0	0.08974							High	1.16316			High	2.06736			0
EVIKESKQEHKDVM	P14136	9	1	1	1699.87	0	5.21e-05	High		2.27105		High	2.72131			High	3.90661	High	3.09479			0
MDAEVPDVNIEGPDAK	Q09666	1	1	1	1699.79	0	0.0002915													High	2.51853	0
GMGQKDSYVGDEAQSK	P63267;P60709	1	6	2	1699.76	0	0.0005527													High	3.01282	0
VDIDVPDVNIEGPEGK	Q09666	1	1	1	1695.85	0	4.814e-05													High	3.70839	0
VLLPKKTESHKAKSK	Q16777	1	1	1	1694.03	0	0.002241									High	2.29929					0
IDVDAPDIDIHGPDAK	Q09666	1	1	1	1690.83	0	0.0005627													High	4.27179	0
LPTKETIEQEKRSE	P63313	6	1	1	1687.89	0	0.002035	High		3.54362		High	1.81151					High	3.45929			0
IEGGDGHLFEDEEIK	Q15063	2	1	1	1687.79	0	0.000176													High	2.7531	0
MRDGEVIKESKQEH	P14136	2	1	1	1685.83	0	8.826e-06									High	4.38606					0
RDGEVIKESKQEHK	P14136	15	1	1	1682.88	0	6.342e-09	High	High	3.78654	2.31748	High	4.63658			High	3.61295					0
NAHSSKDEVQNAVQR	P12111	2	1	1	1682.83	0	4.175e-08													High	3.07543	0
VEGDLKGPEVDLKGPK	Q09666	2	1	1	1680.92	0	1.002e-06													High	3.64585	0
VDVEVPDVSLEGPEGK	Q09666	1	1	1	1668.84	0	9.54e-06													High	3.45363	0
VDIEGPDVNIEGPEGK	Q09666	1	1	1	1667.81	0	5.071e-07													High	4.81934	0
QVINETSQHHDDLE	P08670	5	1	1	1664.76	0	0.02081	High		2.69265		High	3.18475			High	2.48876	High	3.20238			0
RIVDGKVVSETNDTK	P05783	1	1	1	1660.89	0.004	0.08085													High	2.22624	0
RETSLDTKSVSEGHL	P14136	1	1	1	1658.84	0	0.001257											High	3.49759			0
VEAPAANSDQTVTVKE	P80723	1	1	1	1658.83	0	1.865e-05											High	4.04845			0
VGENADSQIKLSIKR	P07305	1	1	1	1657.93	0	5.856e-05													High	2.18283	0
TENSTSAPAAKPKRAK	P07305	1	1	1	1656.91	0.001	0.03978					High	1.82908									0
DDYVPKLYEQLSGK	P30086	1	1	1	1654.84	0	0.06527											High	3.02921			0
DAAAAKEEAPKAEPEK	P80723	1	1	1	1654.83	0	0.0007033													High	3.92973	0
FSNLQIRETSLDTK	P14136	4	1	1	1651.86	0	0.0001128	High	High	3.71211	3.28752	High	3.51767			High	3.36414					0
RMFGGPGTASRPSSSR	P08670	7	1	1	1650.82	0	8.713e-08	High		5.09024		High	5.35901			High	5.25083					0
QIRETSLDTKSVSEG	P14136	2	1	1	1649.84	0	0.0009729		High		3.14455	High	4.28672									0
GEGGEFSVDRPIIDR	Q8NC51	1	1	1	1646.82	0	0.007026													High	2.81043	0
DGEVIKESKQEHKD	P14136	8	1	1	1641.81	0	3.617e-12					High	4.85434			High	2.11917	High	3.83639			0
VDTNAPDLSLEGPEGK	Q09666	1	1	1	1641.8	0	2.522e-05													High	3.25444	0
KNPLPSKETIEQEK	P62328	1	1	1	1640.89	0	5.313e-10					High	4.13508									0
NPLPSKETIEQEKQ	P62328	2	1	1	1640.86	0	5.961e-06					High	2.73004							High	3.6096	0
RSYVSSGEMMVGGLAP	P14136	1	1	1	1640.78	0	0.008619					High	3.35964									0
LSALEEYTKKLNTQ	P02647	2	1	1	1637.88	0.004	0.07862							High	1.99733					High	2.57743	0
VGVEVPDVNIEGPEGK	Q09666	1	1	1	1637.84	0	3.195e-05													High	2.81211	0
RDGQVINETSQHHD	P08670	3	1	1	1635.75	0	0.0007007									High	2.05253			High	3.09744	0
RDQKLSELDDRADA	Q15836	1	3	1	1631.8	0	0.05024											High	3.91895			0
ETSLDTKSVSEGHLK	P14136	4	1	1	1630.83	0	7.242e-05					High	3.39931			High	3.69415					0
AEDGATPSPSNETPKK	P29966	2	1	1	1628.78	0	0.01633											High	3.09462	High	2.50953	0
GEVIKESKQEHKDV	P14136	13	1	1	1625.85	0	4.755e-07					High	4.28029			High	3.90121	High	3.47141			0
EQIVPKPEEEVAQK	P18621	1	1	1	1623.87	0.004	0.08047													High	1.79916	0
GEPAAAAAPEAGASPVEK	P29966	1	1	1	1622.81	0	1.88e-07													High	4.76714	0
PEPAKSAPAPKKGSKK	O60814	13	5	1	1620.95	0	0.01206					High	3.04969			High	3.73684	High	3.7945			0
TVEMRDGEVIKESK	P14136	3	1	1	1620.83	0	6.512e-05					High	1.93246			High	1.50124					0
SSVPGVRLLQDSVDF	P08670	1	1	1	1618.84	0.003	0.01939													High	2.72354	0
NELRVAPEEHPTLL	P63267	1	4	1	1617.86	0.004	0.0633													High	2.60461	0
VLLPKKTESHHKAK	P0C0S8	2	7	1	1615.97	0.003	0.03688							High	1.69678					High	1.37431	0
LSAKPAPPKPEPKPR	Q15651	3	1	1	1612.96	0	0.008914							High	2.09644					High	2.38252	0
GKVNVDEVGGEALGRL	P68871	1	1	1	1612.87	0	7.323e-10													High	4.27168	0
GKYKEETIEKMQE	P61254	1	1	1	1612.79	0.004	0.07612													High	2.51533	0
VDINAPDVEVQGKVK	Q09666	1	1	1	1610.88	0.004	0.04926													High	2.25132	0
IENEEQEYVQTVK	P04083	1	1	1	1608.78	0	7.667e-09													High	3.82994	0
PDPAKSAPAPKKGSKK	Q5QNW6	5	3	1	1606.93	0	0.003199	High		2.43036		High	1.78705			High	3.19765	High	3.65195			0
TEKLVTSKGDKELR	P02671	1	1	1	1603.9	0	0.0003561									High	3.6058					0
EEPAAAGSGAASPSAAEK	P29966	2	1	1	1600.75	0	7.891e-17					High	4.32313							High	4.53765	0
GFKAEGPEVDVNLPK	Q09666	1	1	1	1599.85	0	3.29e-11													High	5.39031	0
LLPKKTESHKAKSK	Q16777	1	1	1	1594.96	0.004	0.2232											High	1.40661			0
DGQVINETSQHHDD	P08670	1	1	1	1594.68	0.002	0.01542													High	1.82291	0
SNLQIRETSLDTKS	P14136	2	1	1	1591.83	0	3.992e-11					High	5.4709			High	5.24083					0
ASTLQSQKAEGTGDAK	O00479	1	1	1	1591.8	0.003	0.1651									High	1.11938					0
KAAKPSVPKVPKGRK	Q92522	1	1	1	1591.02	0.003	0.009696	High		2.36763												0
VSEGTKAVTKYTSSK	P58876;Q99877;Q5QNW6	4	12	3	1585.84	0	0.108							High	2.67804			High	2.95887	High	2.23617	0
GFKGEGPEVDVNLPK	Q09666	1	1	1	1585.82	0	2.95e-06													High	5.7748	0
LSFPTTKTYFPHF	P69905	2	1	1	1585.8	0.003	0.02102							High	2.06997					High	2.3131	0
LSAKPAPPKPEPKPK	P05204	6	1	1	1584.95	0	0.0004965									High	3.36337			High	3.66079	0
HTEKLVTSKGDKEL	P02671	1	1	1	1584.86	0	0.003363											High	4.25135			0
APPTRGPPPSYGGSSR	P38159	1	1	1	1583.8	0.003	0.02203													High	1.93321	0
AGFKETRASERAEM	P14136	1	1	1	1582.77	0	0.06247									High	1.98556					0
RGFSANSARLPGVSR	P02538;P04259	1	3	2	1574.85	0	0.1488							High	4.85022							0
GGSTSYGTGSETESPR	P02671	1	1	1	1572.68	0	4.111e-06													High	4.69435	0
GFKGEGPDVDVNLPK	Q09666	1	1	1	1571.81	0	5.324e-08													High	5.60136	0
KSTGGKAPRKQLATK	Q6NXT2	2	5	1	1570.94	0.003	0.1663	High		2.19658						High	2.32296					0
GDVDVSLPKVEGDLK	Q09666	1	1	1	1570.83	0	0.003719													High	2.84314	0
VIKESKQEHKDVM	P14136	10	1	1	1570.83	0	0.0006565	High		2.89694						High	2.82163					0
EVIKESKQEHKDV	P14136	2	1	1	1568.83	0	6.397e-05					High	2.47437			High	3.51026					0
SVSEGHLKRNIVVK	P14136	5	1	1	1565.91	0	0.003878					High	1.79511			High	1.92154					0
RRMFGGPGTASRPSS	P08670	1	1	1	1563.79	0	3.742e-05					High	2.60479									0
DVNVGDIDIEGPEGK	Q09666	1	1	1	1556.75	0	5.969e-06													High	3.50109	0
QDEVKLPAKLSISK	Q6NZI2	1	1	1	1555.91	0	3.851e-05													High	3.43388	0
RDGEVIKESKQEH	P14136	10	1	1	1554.79	0	6.843e-14	High	High	2.23619	3.59213	High	5.78584			High	4.83995	High	5.22146			0
LNETGDEPFQYKN	P15104	1	1	1	1554.71	0	0.007047											High	5.1369			0
YNELRVAPEEHPV	P60709	1	3	1	1552.78	0	0.1183							High	3.1614							0
GVVHVIDVDRGEEK	P55087	1	1	1	1551.81	0	0.01848											High	1.45515			0
KAPKSPAKAKAVKPK	P10412	1	1	1	1549	0.003	0.01713	High		2.57173												0
SETQDPEEVSVTVK	Q00610	1	1	1	1547.75	0.008	0.1863													High	1.55663	0
SDMIVAAIQAEKNR	P07305	1	1	1	1545.81	0.002	0.01206													High	2.68927	0
ESRAELTSDKDMY	P34741	1	1	1	1544.69	0.004	0.08229													High	1.95099	0
DGKLTKEEIVDKY	O43852	1	1	1	1537.81	0	1.195e-11													High	4.7625	0
VINETSQHHDDLE	P08670	6	1	1	1536.69	0	0.005903	High		1.77268		High	2.29515			High	1.91988	High	1.94898	High	1.55149	0
ADSGEGDFLAEGGGVR	P02671	7	1	1	1536.69	0	1.423e-13	High	High	5.19855	5.25404	High	4.93173	High	5.13978	High	4.98869	High	4.84032	High	5.25813	0
KPKAAKPKTAKPKAA	P10412	1	1	1	1534.98	0.003	0.009286	High		2.92433												0
NTLPTKETIEQEK	P63313	1	1	1	1530.8	0	9.992e-05													High	3.4612	0
VGAHAGEYGAEALER	P69905	2	1	1	1529.74	0	1.316e-12													High	6.23276	0
MDSPDINIEGPDVK	Q09666	1	1	1	1529.72	0	0.005817													High	1.49945	0
LEKETKEEGKPLQ	P07197	1	1	1	1528.83	0.004	0.2012											High	3.10643			0
GAYKAIPVAQDLNAP	P10451	1	1	1	1527.82	0.004	0.276							High	2.75276							0
GEVIKESKQEHKD	P14136	10	1	1	1526.78	0	2.046e-06	High	High	1.79129	2.31572	High	3.42871			High	4.79984	High	3.63925			0
TPKKVKKPATAAGTK	P16402	1	1	1	1525.95	0.003	0.01137	High		2.76753												0
PEPTKSAPAPKKGSK	P58876	3	1	1	1522.86	0	0.004226	High		3.94551						High	2.2597	High	3.54345			0
IRETSLDTKSVSEG	P14136	3	1	1	1521.78	0	0.05786	High		3.70269						High	3.79677	High	3.7956			0
AAKPKKAPKSPAKAK	P10412	1	1	1	1520.96	0	0.00422	High		4.27896												0
KAAKPKKAPKSPAKA	P10412	1	1	1	1520.96	0.004	0.1975											High	2.83256			0
LLPKKTESHHKAK	P0C0S8	1	7	1	1516.9	0.008	0.1591													High	1.14586	0
RNIVVKTVEMRDG	P14136	1	1	1	1516.83	0	0.0001704									High	3.68549					0
AQLGGPEAAKSDETAA	P04792	1	1	1	1515.73	0	2.664e-06													High	3.45519	0
EPDQLLATLEKQE	Q9UPN7	2	1	1	1513.78	0.004	0.1047					High	1.5537							High	1.37181	0
NPLPSKETIEQEK	P62328	5	1	1	1512.8	0	0.0001484					High	3.02505			High	3.27946			High	3.66453	0
TAKPKAAKPKKAAAK	P10412	2	1	1	1508.96	0	0.002987	High		3.70573												0
PEPSKSAPAPKKGSK	Q99877	1	2	1	1508.84	0	0.06679									High	2.43185					0
SNLQIRETSLDTK	P14136	5	1	1	1504.8	0	1.629e-08	High		3.58468		High	4.48834			High	3.62612	High	3.58192			0
NELRVAPEEHPVL	P60709	1	3	1	1502.8	0	0.000146													High	3.35927	0
TSLDTKSVSEGHLK	P14136	1	1	1	1501.78	0	0.0001993									High	2.94082					0
MELERPGGNEITR	P02671	2	1	1	1501.75	0	0.0002898													High	2.76612	0
AEDGATPSPSNETPK	P29966	2	1	1	1500.69	0	1.865e-05											High	2.07348	High	3.44104	0
SAKPAPPKPEPKPR	Q15651	1	1	1	1499.87	0	1.562e-05													High	3.21711	0
KTETQEKNPLPSK	P62328	1	1	1	1499.81	0.003	0.01935													High	2.23148	0
HSSKDEVQNAVQR	P12111	1	1	1	1497.75	0.008	0.1614													High	2.16961	0
TYSLGSALRPSTSR	P08670	1	1	1	1495.79	0	0.0009132													High	2.11871	0
VHLTPEEKSAVTAL	P68871	2	1	1	1494.82	0.004	0.05248							High	2.94047					High	3.40886	0
MFGGPGTASRPSSSR	P08670	3	1	1	1494.71	0	0.005127	High		1.98985		High	2.10351			High	1.96568					0
PEPAKSAPAPKKGSK	O60814	7	5	1	1492.85	0	1.006e-06	High		3.12147		High	3.92575			High	3.50021	High	3.01224			0
SEGTKAVTKYTSSK	P58876;Q99877;Q5QNW6	1	12	3	1486.78	0	0.006833											High	3.10211			0
VESEIKVPDVELK	Q09666	1	1	1	1484.82	0	1.674e-05													High	3.76431	0
RKASGPPVSELITK	P16403;P16402;P10412	1	3	3	1482.87	0	5.968e-05													High	4.58945	0
DNIQGITKPAIRR	P62805	1	1	1	1481.86	0	0.007798													High	3.38067	0
DGQVINETSQHHD	P08670	1	1	1	1479.65	0.008	0.1988													High	1.87572	0
PDPAKSAPAPKKGSK	Q5QNW6	2	3	1	1478.83	0	0.002884	High		3.59081						High	2.9726					0
SETAPAAPAAPAPAEK	P10412	1	1	1	1478.75	0	5.898e-07													High	4.51018	0
LPTRVDFSLAGALN	P14136	1	1	1	1473.81	0.004	0.1283					High	2.36323									0
ALTNGIYPHKLVF	Q02878	2	1	1	1472.83	0	0.1493							High	2.71355					High	2.10064	0
GGYKEPAAPVSIQR	Q14847	1	1	1	1472.79	0.002	0.01663													High	2.93208	0
SAKPAPPKPEPKPK	P05204	3	1	1	1471.86	0	0.0008118	High		4.31728						High	4.9286			High	3.65245	0
KPTSAKPSSTTPRL	P27816	1	1	1	1470.83	0	4.201e-05					High	2.40972									0
DEILPTTPISEQK	P23396	1	1	1	1470.77	0.003	0.03445													High	3.46387	0
EVIKESKQEHKD	P14136	3	1	1	1469.76	0	9.447e-06					High	2.49458					High	2.4293			0
TEAPLNPKANREK	P63267;P60709	4	10	2	1467.79	0	0.003137													High	2.13363	0
VDVPDVNIEGPDAK	Q09666	1	1	1	1467.73	0	0.007871													High	1.42845	0
DSGEGDFLAEGGGVR	P02671	3	1	1	1465.66	0	3.145e-07		High		5.64338									High	4.82168	0
IRETSLDTKSVSE	P14136	4	1	1	1464.76	0	0.0815	High		3.54653		High	3.20673			High	3.61889	High	3.88458			0
VGGLAPGRRLGPGTR	P14136	3	1	1	1463.86	0	0.03839					High	3.25914			High	2.13676					0
QIRETSLDTKSVS	P14136	3	1	1	1463.77	0	8.22e-05	High		4.07596		High	3.66328			High	3.91781					0
STITSREIQTAVR	Q99877;P58876;Q5QNW6;O60814	1	13	4	1461.81	0	2.753e-06													High	3.57952	0
RIKEDEDDKTVL	P14625	1	2	1	1460.76	0	0.001791													High	3.56131	0
RNIVVKTVEMRD	P14136	3	1	1	1459.81	0	0.0004327	High		3.34299		High	3.78507			High	4.06795					0
STSYGTGSETESPR	P02671	1	1	1	1458.64	0	9.514e-05													High	2.99806	0
SETGAGKHVPRAVF	P68363	1	5	1	1455.77	0	5.338e-05													High	2.88951	0
APGRRLGPGTRLSL	P14136	1	1	1	1450.86	0	0.01873									High	2.53372					0
FGGPGTASRPSSSRS	P08670	1	1	1	1450.71	0	0.002237	High		2.63458												0
SDVELDDLGKDEL	Q15084	1	1	1	1447.68	0	3.001e-07													High	4.98579	0
KVNVDEVGGEALGR	P68871	1	1	1	1442.76	0	2.302e-09													High	5.62132	0
KAGGTKPKKPVGAAK	P16403	1	1	1	1437.89	0	0.02045					High	2.8627									0
SYVTTSTRTYSLG	P08670	1	1	1	1435.71	0	3.033e-09					High	3.68449									0
SSVEIENPETSDQ	P02724	1	1	1	1434.63	0	0.0002042													High	3.59249	0
AAHLPAEFTPAVHA	P69905	1	1	1	1431.74	0	7.391e-06													High	3.79221	0
SDDEVDDPAVELK	P12111	1	1	1	1431.65	0	9.489e-05													High	3.99727	0
LPSKETIEQEKQ	P62328	2	1	1	1429.76	0	5.241e-06					High	3.28676							High	3.96863	0
LASVSTVLTSKYR	P69905	5	1	1	1424.82	0	0.0003078							High	2.71784	High	2.27566			High	2.82697	0
EMRDGEVIKESK	P14136	1	1	1	1420.71	0	7.505e-05									High	4.14307					0
VEVGADDDEGGAER	Q6NZI2	1	1	1	1418.61	0	6.164e-11													High	3.27142	0
NLQIRETSLDTK	P14136	6	1	1	1417.77	0	0.0002371	High	High	2.84765	2.12818	High	4.06757			High	4.39401					0
RDGEVIKESKQE	P14136	2	1	1	1417.73	0	0.007925					High	2.43956			High	2.35368					0
ASPKPAGLKESSDK	P46821	2	1	1	1414.76	0	0.0001917					High	2.42239			High	2.30002					0
VEGDLKGPEIDIK	Q09666	1	1	1	1412.76	0.004	0.05378													High	2.03252	0
KTEAPAAPAAQETK	P80723	1	1	1	1412.74	0.004	0.07034													High	2.16707	0
GEVIKESKQEHK	P14136	3	1	1	1411.76	0	0.03298	High		2.45119						High	3.21885	High	3.45121			0
NDYFVVHMKQK	P60903	1	1	1	1408.7	0.004	0.07196													High	1.92219	0
SEQKDQEPTTDM	P11137	1	1	1	1408.6	0	0.1606											High	2.20019			0
SPGGVYATRSSAVR	P08670	1	1	1	1407.73	0.006	0.06837	High		2.01734												0
DQEIIEVDPDTK	P08708	1	1	1	1401.68	0	2.196e-05													High	3.207	0
SLDTKSVSEGHLK	P14136	3	1	1	1400.74	0	3.805e-06					High	2.80387			High	2.72707					0
FRDGDILGKYVD	P61604	1	1	1	1397.71	0	0.06141							High	2.94791							0
NADEFEDMVAEK	P27635	1	1	1	1397.59	0	4.055e-08													High	3.69154	0
NELRVAPEEHPT	P63267	1	4	1	1391.69	0	0.0001302													High	3.07485	0
NELRVAPEEHPV	P60709	1	3	1	1389.71	0	0.0004045													High	3.61477	0
ETPAATEAPSSTPK	P80723	1	1	1	1386.68	0	0.0006362													High	2.59336	0
KTSATVGPKAPSGGK	P16104	1	1	1	1385.78	0	0.006842													High	2.7196	0
NLRETNLDSLPL	P08670	1	1	1	1384.74	0.008	0.1877													High	2.53055	0
VDLEPTVIDEVR	P68363	4	3	1	1384.73	0	9.501e-13					High	3.99987			High	3.66518	High	3.63283	High	2.91645	0
NPLPSKETIEQE	P62328	1	1	1	1384.7	0	0.00636													High	2.38297	0
ASPVEKEAPAEGEA	P29966	2	1	1	1384.66	0	0.0002277									High	3.03067	High	3.67819			0
RASPSKPASAPASR	P27816	1	1	1	1382.75	0	3.21e-05					High	3.03654									0
SNLQIRETSLDT	P14136	2	1	1	1376.7	0	4.312e-09					High	4.16845			High	3.46191					0
TETQEKNPLPSK	P62328	1	1	1	1371.72	0	0.003145													High	2.94992	0
ELERPGGNEITR	P02671	1	1	1	1370.7	0	1.715e-06													High	3.23388	0
GGLAPGRRLGPGTR	P14136	1	1	1	1364.79	0	0.03454									High	1.90623					0
FGGPGTASRPSSSR	P08670	5	1	1	1363.67	0	0.004241	High		2.68155						High	2.74217			High	2.5514	0
GAYKAIPVAQDLN	P10451	1	1	1	1359.73	0	0.0234							High	2.2723							0
PAANSDQTVTVKE	P80723	1	1	1	1359.68	0	0.0008648											High	4.25603			0
SGEGDFLAEGGGVR	P02671	1	1	1	1350.63	0	2.397e-06		High		4.92943											0
APGRRLGPGTRLS	P14136	1	1	1	1337.78	0	0.02085									High	3.75338					0
IRETSLDTKSVS	P14136	1	1	1	1335.71	0	0.05336									High	2.74472					0
QTVAVGVIKAVDK	P68104	3	2	1	1327.8	0	6.137e-08					High	3.47671							High	4.33411	0
DNIQGITKPAIR	P62805	2	1	1	1325.75	0	0.0003433													High	3.42106	0
PDMAEIEKFDK	P62328	1	1	1	1322.63	0	3.738e-06													High	4.70555	0
ISTGGGETEETLK	Q15063	1	1	1	1321.65	0	0.0002033													High	3.10224	0
GEDLTRHHDEL	Q96D15	1	1	1	1321.61	0.002	0.01213													High	2.16103	0
LPTKETIEQEK	P63313	2	1	1	1315.71	0	4.148e-10	High		2.80484		High	3.28246									0
VLSPADKTNVKAA	P69905	3	1	1	1313.74	0	0.0007189	High		1.49944		High	1.27284			High	1.17363					0
LDTKSVSEGHLK	P14136	1	1	1	1313.7	0	0.0001014									High	3.27582					0
IIDGVPVEITEK	Q15063	1	1	1	1312.74	0	0.0004215													High	1.87233	0
ASVSTVLTSKYR	P69905	2	1	1	1311.73	0	0.007273													High	2.07198	0
LVVYPWTQRF	P68871	6	5	1	1308.71	0	2.101e-09	High		2.76986		High	3.35423	High	3.23541	High	2.95304			High	2.95354	0
SETGAGKHVPRAV	P68363	1	5	1	1308.7	0.004	0.05571													High	2.00011	0
GLAPGRRLGPGTR	P14136	4	1	1	1307.77	0	0.0002059	High		2.05311		High	2.43775			High	2.16374					0
LQIRETSLDTK	P14136	4	1	1	1303.72	0	1.839e-07	High		3.16882		High	3.43284			High	3.0244					0
GGPGTASRPSSSRS	P08670	1	1	1	1303.64	0	0.004651					High	2.13102									0
HAGEYGAEALER	P69905	1	1	1	1302.61	0	1.202e-07													High	3.4815	0
LPSKETIEQEK	P62328	2	1	1	1301.7	0	1.81e-06					High	2.56718							High	2.24083	0
RLGPGTRLSLAR	P14136	1	1	1	1296.79	0.001	0.03624					High	3.0556									0
DLEPTVIDEVR	P68363	1	3	1	1285.67	0	0.0005637													High	2.23084	0
DEVVQIFDKEG	P30085	1	1	1	1278.62	0	9.725e-05													High	2.90634	0
TEKPIDSETKM	P43003	2	1	1	1278.62	0	0.02418		High		3.58362							High	4.35648			0
KDPNAPKRPPSA	P26583;P09429	1	3	2	1277.7	0.008	0.1589													High	1.07824	0
QIRETSLDTKS	P14136	1	1	1	1277.67	0	3.495e-06					High	2.6228									0
TVEMRDGEVIK	P14136	1	1	1	1276.66	0.003	0.08868									High	1.29959					0
SDMIVAAIQAEK	P07305	1	1	1	1275.66	0	3.842e-08													High	3.70394	0
VEGEIAEEAAEK	O95810	1	1	1	1274.62	0	9.675e-10													High	4.32338	0
LFERLTLKHD	P02792	1	1	1	1271.71	0	0.005322													High	2.5986	0
GEDLTKNHDEL	Q15293	2	1	1	1270.59	0	0.008531													High	2.24468	0
GKKPDIDITGPK	Q09666	1	1	1	1268.72	0	1.127e-05													High	3.79212	0
LASVSTVLTSKY	P69905	1	1	1	1268.71	0	0.07045							High	2.68278							0
AEGPEVDVNLPK	Q09666	1	1	1	1267.66	0	2.621e-07													High	3.77238	0
GEGDFLAEGGGVR	P02671	1	1	1	1263.6	0	0.0001272		High		3.3394											0
SSLNLRETNLD	P08670	1	1	1	1261.64	0	0.005447									High	2.92229					0
SLVSKGTLVQTK	P16403;P16402;P10412;P16401	1	5	4	1260.75	0.003	0.02442													High	2.21191	0
PSDLRPGDVSSK	Q05682	1	1	1	1257.64	0.004	0.06319													High	2.47824	0
GKEESLDSDLY	P02775	1	1	1	1255.57	0.003	0.02855													High	2.68736	0
KIPVRHLYTK	Q00839	1	1	1	1254.77	0.006	0.107	High		0.847689												0
GEGPEVDVNLPK	Q09666	1	1	1	1253.64	0	0.0002576													High	3.29372	0
YPEGSSEEREA	P21980	1	1	1	1253.53	0	0.0005044													High	1.8072	0
GRTQDENPVVH	P02686	1	1	1	1251.61	0	0.003214											High	3.77473			0
APGRRLGPGTRL	P14136	1	1	1	1250.74	0.007	0.2173									High	2.18926					0
LERPGGNEITR	P02671	1	1	1	1241.66	0	4.189e-05													High	3.77549	0
GEGPDVDVNLPK	Q09666	1	1	1	1239.62	0	0.0001474													High	3.48093	0
KEAPAPPKAEAK	P62750	1	1	1	1236.7	0	2.771e-05													High	4.7675	0
EEVSGNVSPGTR	P02671	1	1	1	1231.59	0	0.0002148													High	2.98293	0
DGQVINETSQH	P08670	1	1	1	1227.56	0	0.0005053													High	3.05189	0
GGPGTASRPSSSR	P08670	2	1	1	1216.6	0	0.0006813	High		2.08536										High	2.19517	0
NVDEVGGEALGR	P68871	1	1	1	1215.6	0	0.0002367													High	3.9232	0
TEAPLNPKANR	P63267;P60709	1	10	2	1210.65	0.003	0.03291													High	1.32744	0
VHLTPEEKSAV	P68871	1	1	1	1209.65	0	0.005854													High	3.35863	0
SETGAGKHVPRA	P68363	2	5	1	1209.63	0	0.006707					High	2.53236							High	2.45544	0
STGGGETEETLK	Q15063	1	1	1	1208.57	0	0.0002184													High	1.81837	0
FGGPGTASRPSSS	P08670	3	1	1	1207.57	0	0.0009175	High		2.44599		High	2.2417							High	2.5025	0
ETLKHEKPPQ	P30273	1	1	1	1206.65	0.004	0.06476													High	1.42258	0
EGDFLAEGGGVR	P02671	1	1	1	1206.58	0	9.446e-05		High		4.2552											0
GKDQSGEVLSSV	P55087	1	1	1	1205.6	0	0.138											High	2.62932			0
TNEKVELQEL	P08670	1	2	1	1202.63	0	0.0001694													High	2.3496	0
VKSPELQAEAK	P02652	1	1	1	1199.66	0	2.912e-05													High	3.52426	0
DSYVGDEAQSK	P63267;P60709	1	6	2	1198.53	0	6.355e-05													High	2.81151	0
VVYPWTQRF	P68871	3	5	1	1195.63	0	0.001166					High	2.22106	High	2.1186	High	1.4693					0
QIRETSLDTK	P14136	8	1	1	1190.64	0	1.259e-07	High	High	1.67918	1.45804	High	3.06105			High	1.83413					0
DLPTSVRSSVE	Q5CZC0	1	1	1	1189.61	0.004	0.1417					High	1.89733									0
VHHEPQLSDK	O43852	1	1	1	1189.6	0	1.054e-06													High	3.5149	0
RNIVVKTVEM	P14136	1	1	1	1188.68	0	0.01169					High	2.54351									0
PSKETIEQEK	P62328	4	1	1	1188.61	0	2.872e-07					High	2.84256	High	2.02171					High	2.40193	0
KPAPPKPEPKP	P05204;Q15651	2	2	2	1185.7	0.003	0.1166					High	3.22516							High	2.42309	0
VEMRDGEVIK	P14136	1	1	1	1175.61	0.003	0.1119									High	2.49296					0
SLNLRETNLD	P08670	1	1	1	1174.61	0	0.02658									High	2.06764					0
VLSPADKTNVK	P69905	2	1	1	1171.67	0.003	0.03455													High	1.33165	0
GRRLGPGTRLS	P14136	6	1	1	1169.69	0	0.004711	High		2.50085		High	2.5018			High	2.68711					0
GTGASGSFKLNK	P16403;P16402;P10412;P16401	3	5	4	1166.62	0	2.21e-06					High	2.02609							High	3.25478	0
FERLTLKHD	P02792	3	1	1	1158.63	0	0.001157											High	3.86956	High	3.85579	0
MPEMNIKAPK	Q09666	1	1	1	1158.6	0.008	0.143													High	1.37843	0
IRETSLDTKS	P14136	5	1	1	1149.61	0	0.001941	High		3.94988		High	3.55883			High	3.69984	High	3.35293			0
PPPLPTRVDF	P14136	1	1	1	1138.63	0	0.01267									High	1.28147					0
APGRRLGPGTR	P14136	4	1	1	1137.66	0	2.397e-05	High		2.7032		High	2.77849			High	2.7718					0
SGPPVSELITK	P16403;P16402;P10412	1	3	3	1127.63	0.004	0.09512													High	2.71998	0
FGGPGTASRPSS	P08670	1	1	1	1120.54	0	2.161e-05	High		2.37126												0
MRYVASYLL	P05387	1	1	1	1115.59	0	0.2601							High	1.78203							0
RMVVKITDF	P25092	1	1	1	1108.62	0.004	0.2087		High		0.361255											0
DESGPSIVHR	P60709	1	7	1	1096.54	0.002	0.01326													High	1.73017	0
GEYGAEALER	P69905	1	1	1	1094.51	0	0.0001089													High	3.07326	0
PEPAKSAPAPK	O60814	5	5	1	1092.6	0	9.902e-05	High		4.53137		High	4.123			High	4.38489	High	4.18328	High	4.19507	0
APPKPEPKPK	P05204	1	1	1	1088.65	0.004	0.06401													High	1.36281	0
GASGSFVVVQK	Q5SSJ5	1	1	1	1078.59	0	0.0002314													High	3.19386	0
MFLSFPTTK	P69905	1	1	1	1071.56	0	0.001123													High	2.84192	0
IRETSLDTK	P14136	5	1	1	1062.58	0	0.01957					High	3.58776			High	3.67276					0
GPPVSELITK	P16403;P16402;P10412;P16401	1	4	4	1040.6	0.003	0.02082													High	3.18521	0
DFLAEGGGVR	P02671	1	1	1	1020.51	0.004	0.1236		High		2.83873											0
VSKPDLTAAL	P08670	1	1	1	1014.58	0	0.005593													High	2.30639	0
LTEAPLNPK	P63267;P60709	1	11	2	982.559	0.004	0.1902											High	2.48277			0
AGFAGDDAPR	P63267;P60709	1	10	2	976.449	0	6.559e-05													High	2.29343	0
GEVDVDVPK	Q09666	1	1	1	957.491	0.003	0.01828													High	2.95767	0
FVQMMTAK	P0DP23	2	1	1	955.474	0	0.002616											High	2.65275	High	2.64727	0
RETSLDTK	P14136	1	1	1	949.496	0.003	0.1479									High	2.0043					0
GDMDVSVPK	Q09666	1	1	1	947.451	0	0.001622													High	2.86174	0
PDMAEIEK	P62328	1	1	1	932.441	0	0.0003496													High	3.23449	0
GDVDVSLPK	Q09666	1	1	1	929.494	0.003	0.02924													High	3.07597	0
SSVPGVRLL	P08670	2	1	1	927.561	0	0.004179					High	2.41922							High	2.25466	0
ADIDVSGPK	Q09666	2	1	1	901.464	0	0.000198													High	2.23848	0
VDIINAKQ	P60174	1	1	1	900.516	0	0.001707													High	2.81433	0
VQMMTAK	P0DP23	1	1	1	808.406	0	0.007175													High	1.5929	0
TNPAKKP	P20896	1	1	1	755.442	0.003	0.08157									High	0.371					0

## Sheet: S2_top down data manual id
Name	Ion Type	Ion Number	Theoretical Mass	Observed Mass	Mass Difference (Da)	Mass Difference (ppm)
B2	B	2	226.095	226.095	-0.000626467	-2.77081
B4	B	4	394.185	394.185	-0.000496467	-1.25948
B5	B	5	522.28	522.28	-0.000456467	-0.873989
B6	B	6	609.312	609.312	-0.000486467	-0.798387
B7	B	7	680.349	680.349	-0.000596467	-0.876707		[M+H]+
B8	B	8	777.402	777.401	-0.00135647	-1.74487		1092.61
B9	B	9	848.439	848.438	-0.00146647	-1.72843
B10	B	10	945.492	945.492	-0.000226467	-0.239523
Y2	Y	2	243.158	243.158	-0.000561467	-2.30906
Y4	Y	4	411.248	411.248	-0.000431467	-1.04916
Y5	Y	5	482.285	482.285	-0.000541467	-1.12271
Y6	Y	6	569.317	569.317	-0.000571467	-1.00378
Y7	Y	7	697.412	697.412	-0.000531467	-0.762056
Y8	Y	8	768.449	768.45	0.000358533	0.466567
Y9	Y	9	865.502	865.501	-0.00140147	-1.61925
Y10	Y	10	994.545	994.543	-0.00199147	-2.00239
Name	Ion Type	Ion Number	Theoretical Mass	Observed Mass	Mass Difference (Da)	Mass Difference (ppm)
B3	B	3	327.179	327.179	-0.000686467	-2.09814
B3	B	3	327.179	327.179	-0.000686467	-2.09814
B3	B	3	327.179	327.179	-0.000686467	-2.09814
B4	B	4	456.222	456.222	-0.000276467	-0.605992
B4	B	4	456.222	456.222	-0.000276467	-0.605992
B7	B	7	753.391	753.39	-0.00112647	-1.4952		[M+H]+
B8	B	8	866.475	866.474	-0.00118647	-1.3693		1384.73
B9	B	9	981.502	981.502	-0.000126467	-0.12885
Y4	Y	4	517.25	517.25	0.000108533	0.209827
Y4	Y	4	517.25	517.25	0.000108533	0.209827
Y5	Y	5	630.334	630.334	4.85331e-05	0.0769959
Y5	Y	5	630.334	630.334	4.85331e-05	0.0769959
Y6	Y	6	729.402	729.404	0.00163853	2.24641
Y7	Y	7	830.45	830.453	0.00295853	3.56257
Y8	Y	8	927.503	927.503	0.000198533	0.214051
Y8	Y	8	927.503	927.503	0.000198533	0.214051
Y9	Y	9	1056.55	1056.54	-0.000391467	-0.370516
Y9	Y	9	1056.55	1056.54	-0.000391467	-0.370516
Y10	Y	10	1169.63	1169.63	-0.000451467	-0.385991
Y10	Y	10	1169.63	1169.63	0.000548533	0.46898
Name	Ion Type	Ion Number	Theoretical Mass	Observed Mass	Mass Difference (Da)	Mass Difference (ppm)
B2	B	2	158.069	158.069	-0.000416467	-2.63471
B3	B	3	286.164	286.165	0.000623533	2.17894
B4	B	4	383.217	383.217	-0.000136467	-0.356109
B5	B	5	454.254	454.255	0.000753533	1.65884
B6	B	6	551.307	551.307	-6.46688e-06	-0.0117301		[M+H]+
B8	B	8	776.454	776.455	0.000273533	0.352285		1471.86
B10	B	10	1002.55	1002.55	0.000923533	0.921184
B13	B	13	1324.75	1324.75	0.00144353	1.08966
Y2	Y	2	243.158	243.159	0.000438533	1.80349
Y3	Y	3	371.253	371.254	0.000478533	1.28897
Y4	Y	4	468.306	468.307	0.000718533	1.53432
Y6	Y	6	694.401	694.403	0.00136853	1.97081
Y7	Y	7	822.496	822.498	0.00140853	1.71251
Y8	Y	8	919.549	919.55	0.000648533	0.705273
Y9	Y	9	1016.6	1016.6	0.000888533	0.874023
Y10	Y	10	1087.64	1087.64	-0.000221467	-0.203622
Y11	Y	11	1184.69	1184.69	0.00101853	0.859745
Y12	Y	12	1312.79	1312.79	0.00105853	0.806325
Y13	Y	13	1383.82	1383.83	0.00194853	1.40808
Name	Ion Type	Ion Number	Theoretical Mass	Observed Mass	Mass Difference (Da)	Mass Difference (ppm)
B2	B	2	234.1	234.101	0.000283533	1.21116
B3	B	3	348.143	348.144	0.000353533	1.01548
B4	B	4	461.227	461.228	0.000293533	0.636417
B5	B	5	589.286	589.286	-0.000286467	-0.486125
B9	B	9	1088.56	1088.56	-0.00172647	-1.58601
B11	B	11	1288.68	1288.68	-0.00181647	-1.40956		[M+H]+
B12	B	12	1403.7	1403.7	0.000243533	0.173493		1651.86
Y2	Y	2	247.153	247.153	-0.000481467	-1.94805
Y5	Y	5	562.296	562.296	-0.000511467	-0.909604
Y6	Y	6	663.344	663.344	-0.000191467	-0.288639
Y7	Y	7	792.387	792.386	-0.000781467	-0.986219
Y8	Y	8	948.488	948.488	0.000108533	0.114428
Y9	Y	9	1061.57	1061.57	4.85331e-05	0.0457182
Y10	Y	10	1189.63	1189.63	0.000468533	0.393848
Y11	Y	11	1302.71	1302.71	0.000408533	0.313601
Y12	Y	12	1416.76	1416.76	-0.000521467	-0.368071
Y13	Y	13	1503.79	1503.79	-0.000551467	-0.366718
Name	Ion Type	Ion Number	Theoretical Mass	Observed Mass	Mass Difference (Da)	Mass Difference (ppm)
B5	B	5	586.307	586.307	-0.000746467	-1.27317
B6	B	6	699.392	699.392	0.000193533	0.276716
B7	B	7	814.418	814.419	0.000253533	0.311306
B10	B	10	1130.59	1130.59	-0.00141647	-1.25285
B11	B	11	1229.66	1229.66	-0.00282647	-2.29857		[M+H]+
B15	B	15	1639.82	1639.82	-0.000816467	-0.497901		1900.01
Y4	Y	4	453.27	453.269	-0.00123147	-2.71685
Y6	Y	6	669.345	669.345	0.000148533	0.221908
Y8	Y	8	855.445	855.443	-0.00229147	-2.67868
Y9	Y	9	983.54	983.54	-0.000251467	-0.255675
Y11	Y	11	1199.61	1199.61	-0.000871467	-0.726456
Y12	Y	12	1312.7	1312.7	-0.000931467	-0.709582
Name	Ion Type	Ion Number	Theoretical Mass	Observed Mass	Mass Difference (Da)	Mass Difference (ppm)
B2	B	2	211.096	211.097	0.00103353	4.89604
B3	B	3	324.18	324.18	-2.64669e-05	-0.0816426
B8	B	8	866.45	866.449	-0.00104647	-1.20776
B9	B	9	979.534	979.534	-0.000106467	-0.108691
B10	B	10	1108.58	1108.58	-0.000696467	-0.628253
B12	B	12	1365.68	1365.68	-0.000866467	-0.634459		[M+H]+
B14	B	14	1621.83	1621.83	0.00259353	1.59914		1984.99
B15	B	15	1692.87	1692.87	-0.000516467	-0.305084
B16	B	16	1749.89	1749.89	-0.000976467	-0.558016
B17	B	17	1878.93	1878.93	-0.000566467	-0.301483
Y7	Y	7	747.34	747.339	-0.00116147	-1.55413
Y8	Y	8	875.398	875.398	-0.000741467	-0.847005
Y9	Y	9	1004.44	1004.44	-0.00133147	-1.32558
Y14	Y	14	1562.74	1562.74	-0.00365147	-2.33658
Y15	Y	15	1659.8	1659.79	-0.00141147	-0.850386
Y16	Y	16	1772.88	1772.87	-0.00447147	-2.52215
Name	Ion Type	Ion Number	Theoretical Mass	Observed Mass	Mass Difference (Da)	Mass Difference (ppm)
B2	B	2	200.116	200.116	-0.000366467	-1.83127
B2	B	2	200.116	200.116	-0.000366467	-1.83127
B6	B	6	731.327	731.326	-0.00149647	-2.04623
B8	B	8	917.391	917.393	0.00145353	1.58442		[M+H]+
B14	B	14	1601.81	1601.81	0.00144353	0.90119		2357.23
B18	B	18	2124.06	2124.06	0.000403533	0.189982
B19	B	19	2239.09	2239.09	-0.000536467	-0.239591
B19	B	19	2239.09	2239.1	0.0134635	6.01295
B19	B	19	2239.09	2239.1	0.0134635	6.01295
Y4	Y	4	497.26	497.26	-6.14669e-05	-0.123611
Y8	Y	8	969.488	969.487	-0.00122147	-1.25991
Y8	Y	8	969.488	969.487	-0.00122147	-1.25991
Y8	Y	8	969.488	969.487	-0.00122147	-1.25991
Y9	Y	9	1098.53	1098.53	0.00218853	1.99224
Y10	Y	10	1226.63	1226.62	-0.000771467	-0.628934
Y10	Y	10	1226.63	1226.62	-0.000771467	-0.628934
Y10	Y	10	1226.63	1226.62	-0.000771467	-0.628934
Y11	Y	11	1339.71	1339.71	-0.00183147	-1.36706
Y11	Y	11	1339.71	1339.71	0.000168533	0.125798
Y11	Y	11	1339.71	1339.71	0.000168533	0.125798
Y12	Y	12	1438.78	1438.77	-0.00424147	-2.94796
Y12	Y	12	1438.78	1438.78	-0.00224147	-1.5579
Y12	Y	12	1438.78	1438.78	-0.00224147	-1.5579
Y14	Y	14	1624.84	1624.84	0.00170853	1.05151
Y14	Y	14	1624.84	1624.84	0.00170853	1.05151
Y14	Y	14	1624.84	1624.84	0.00170853	1.05151
Y15	Y	15	1739.87	1739.86	-0.00523147	-3.00682
Y15	Y	15	1739.87	1739.87	0.00176853	1.01647
Y15	Y	15	1739.87	1739.87	0.00176853	1.01647
Y17	Y	17	2027.01	2027.01	-0.00183147	-0.903531
Y17	Y	17	2027.01	2027.01	-0.00183147	-0.903531
Y17	Y	17	2027.01	2027.01	0.00116853	0.576481
Y18	Y	18	2156.05	2156.04	-0.00942147	-4.36977
Y18	Y	18	2156.05	2156.05	-0.00142147	-0.659291
Y18	Y	18	2156.05	2156.05	-0.00142147	-0.659291
Y19	Y	19	2255.12	2255.12	0.00116853	0.518169
Y19	Y	19	2255.12	2255.12	0.00116853	0.518169
Name	Ion Type	Ion Number	Theoretical Mass	Observed Mass	Mass Difference (Da)	Mass Difference (ppm)
B2	B	2	200.116	200.116	-0.000366467	-1.83127
B2	B	2	200.116	200.116	-0.000366467	-1.83127
B8	B	8	917.391	917.392	0.000453533	0.494373
B9	B	9	1016.46	1016.46	4.35331e-05	0.0428282
B10	B	10	1129.54	1129.54	0.000983533	0.870735		[M+H]+
B12	B	12	1386.68	1386.68	-0.000566467	-0.408505		2488.23
B14	B	14	1601.81	1601.81	-0.000556467	-0.347399
B16	B	16	1858.91	1858.91	0.00527353	2.8369
B18	B	18	2124.06	2124.07	0.00640353	3.01476
B19	B	19	2239.09	2239.09	-0.00253647	-1.13281
B19	B	19	2239.09	2239.09	0.000463533	0.207019
B20	B	20	2338.16	2338.15	-0.00394647	-1.68785
B20	B	20	2338.16	2338.16	-0.00194647	-0.832479
Y7	Y	7	885.401	885.4	-0.00172147	-1.94428
Y10	Y	10	1229.57	1229.57	-0.00130147	-1.05847
Y11	Y	11	1357.67	1357.67	-0.000261467	-0.192586
Y11	Y	11	1357.67	1357.67	0.000738533	0.543973
Y12	Y	12	1470.75	1470.75	0.000678533	0.461352
Y12	Y	12	1470.75	1470.75	0.000678533	0.461352
Y13	Y	13	1569.82	1569.82	-0.00173147	-1.10297
Y13	Y	13	1569.82	1569.82	0.00226853	1.44509
Y15	Y	15	1755.88	1755.88	-0.000781467	-0.445056
Y15	Y	15	1755.88	1755.88	0.000218533	0.124458
Y18	Y	18	2158.05	2158.05	-0.000321467	-0.148962
Y18	Y	18	2158.05	2158.05	0.000678533	0.314419
Y19	Y	19	2287.09	2287.09	-0.00291147	-1.273
Y19	Y	19	2287.09	2287.09	-0.00191147	-0.835762
Y20	Y	20	2386.16	2386.16	-0.00632147	-2.64922
Y20	Y	20	2386.16	2386.16	-0.00232147	-0.972887
Name	Ion Type	Ion Number	Theoretical Mass	Observed Mass	Mass Difference (Da)	Mass Difference (ppm)
B6	B	6	716.334	716.333	-0.00135647	-1.89362
B8	B	8	958.472	958.47	-0.00224647	-2.3438
B10	B	10	1168.61	1168.61	-0.00106647	-0.912595
B13	B	13	1480.79	1480.78	-0.00381647	-2.57732
B20	B	20	2338.2	2338.2	-0.00186647	-0.798249		[M+H]+
B21	B	21	2466.26	2466.26	0.00355353	1.44086		2613.34
B22	B	22	2537.3	2537.3	0.00744353	2.93365
Y7	Y	7	788.366	788.366	-0.000711467	-0.902457
Y8	Y	8	901.45	901.451	0.000228533	0.253517
Y13	Y	13	1443.72	1443.72	-0.000791467	-0.548213
Y14	Y	14	1556.8	1556.8	0.000148533	0.095409
Y15	Y	15	1653.86	1653.86	0.000388533	0.234925
Y16	Y	16	1767.9	1767.9	-0.000541467	-0.306277
Y22	Y	22	2484.23	2484.24	0.00137853	0.554913
Name	Ion Type	Ion Number	Theoretical Mass	Observed Mass	Mass Difference (Da)	Mass Difference (ppm)
B13	B	13	1520.75	1520.74	-0.00666647	-4.38368
B13	B	13	1520.75	1520.75	0.000333533	0.219322
B14	B	14	1633.83	1633.83	-0.00272647	-1.66876
B14	B	14	1633.83	1633.83	0.00127353	0.779476
B15	B	15	1690.85	1690.85	-0.00318647	-1.88453
B16	B	16	1819.9	1819.89	-0.00477647	-2.62458
B16	B	16	1819.9	1819.9	0.00122353	0.672309
B17	B	17	1948.94	1948.94	0.00263353	1.35126
B18	B	18	2062.98	2062.99	0.00770353	3.73417
B19	B	19	2210.05	2210.05	0.000293533	0.132817
B19	B	19	2210.05	2210.05	0.00229353	1.03777		[M+H]+
B20	B	20	2338.15	2338.14	-0.00466647	-1.9958		2753.44
B20	B	20	2338.15	2338.14	-0.00166647	-0.71273
B21	B	21	2409.18	2409.18	-0.00177647	-0.737373
B21	B	21	2409.18	2409.18	0.00122353	0.507862
B22	B	22	2522.27	2522.27	0.000163533	0.0648358
B22	B	22	2522.27	2522.27	0.00416353	1.65071
B23	B	23	2621.33	2621.34	0.000753533	0.287462
B23	B	23	2621.33	2621.34	0.00375353	1.43192
Y7	Y	7	803.491	803.491	0.000218533	0.27198
Y8	Y	8	932.533	932.532	-0.00137147	-1.47069
Y8	Y	8	932.533	932.533	-0.000371467	-0.398342
Y20	Y	20	2301.21	2301.21	0.00104853	0.455644
Y20	Y	20	2301.21	2301.21	0.00304853	1.32475
Y21	Y	21	2429.31	2429.31	0.00408853	1.683
Y21	Y	21	2429.31	2429.31	0.00708853	2.91792
Y22	Y	22	2566.37	2566.36	-0.000821467	-0.32009
Y22	Y	22	2566.37	2566.38	0.0111785	4.35578
Y23	Y	23	2637.4	2637.4	-0.000931467	-0.353176
Y23	Y	23	2637.4	2637.42	0.0200685	7.6092
Name	Ion Type	Ion Number	Theoretical Mass	Observed Mass	Mass Difference (Da)	Mass Difference (ppm)
B6	B	6	666.268	666.268	-0.000586467	-0.880226
B7	B	7	795.311	795.312	0.000823533	1.03549
B12	B	12	1395.57	1395.57	-0.000766467	-0.549213
B13	B	13	1494.64	1494.64	-0.000176467	-0.118066
Y8	Y	8	834.46	834.46	-0.000201467	-0.241434
Y9	Y	9	962.555	962.554	-0.00116147	-1.20665		[M+H]+
Y10	Y	10	1075.64	1075.64	0.00177853	1.65347		3257.61
Y16	Y	16	1761.95	1761.95	0.00250853	1.42372
Y17	Y	17	1861.02	1861.02	-0.000901467	-0.484394
Y18	Y	18	1989.08	1989.08	-0.00248147	-1.24755
Y19	Y	19	2076.11	2076.11	0.000488533	0.235312
Y21	Y	21	2346.25	2346.26	0.00944853	4.02707
Y23	Y	23	2590.32	2590.33	0.00191853	0.740654
Y24	Y	24	2689.39	2689.39	0.000508533	0.189088
Y25	Y	25	2818.43	2818.43	-0.00108147	-0.383712
Y26	Y	26	2949.48	2949.47	-0.00357147	-1.21088
Y27	Y	27	3112.54	3112.54	0.00509853	1.63806
Name	Ion Type	Ion Number	Theoretical Mass	Observed Mass	Mass Difference (Da)	Mass Difference (ppm)
B10	B	10	1172.64	1172.64	0.000633533	0.540262
B12	B	12	1414.78	1414.78	-0.00125647	-0.888102
B13	B	13	1511.83	1511.83	0.00198353	1.31201
B14	B	14	1624.91	1624.91	-0.00107647	-0.662476
B20	B	20	2280.27	2280.27	0.00384353	1.68556		[M+H]+
B21	B	21	2409.31	2409.32	0.00725353	3.01062		3285.73
B22	B	22	2537.37	2537.37	-0.00432647	-1.7051
B23	B	23	2666.41	2666.42	0.00308353	1.15644
B26	B	26	2993.6	2993.6	-0.00656647	-2.1935
B28	B	28	3179.67	3179.66	-0.00461647	-1.45187
Y6	Y	6	618.297	618.296	-0.00157147	-2.5416
Y7	Y	7	747.34	747.339	-0.00116147	-1.55413
Y15	Y	15	1659.8	1659.79	-0.000411467	-0.247902
Y28	Y	28	3197.68	3197.69	0.00781853	2.44507
Name	Ion Type	Ion Number	Theoretical Mass	Observed Mass	Mass Difference (Da)	Mass Difference (ppm)
B11	B	11	1220.66	1220.66	-0.00282647	-2.31552
B12	B	12	1319.73	1319.73	0.00176353	1.33628
B12	B	12	1319.73	1319.74	0.00476353	3.60947
B13	B	13	1418.8	1418.8	-0.000646467	-0.455644
B13	B	13	1418.8	1418.8	0.000353533	0.249178
B17	B	17	1876.05	1876.05	-0.000286467	-0.152697
B17	B	17	1876.05	1876.05	-0.000286467	-0.152697		[M+H]+
B22	B	22	2464.29	2464.28	-0.00287647	-1.16726		4035.12
B23	B	23	2563.35	2563.36	0.00571353	2.22893
B24	B	24	2676.44	2676.44	-0.00134647	-0.503082
B24	B	24	2676.44	2676.45	0.00765353	2.8596
B26	B	26	2933.58	2933.58	0.00410353	1.39882
B28	B	28	3148.7	3148.71	0.00611353	1.9416
B28	B	28	3148.7	3148.71	0.00911353	2.89438
B30	B	30	3405.8	3405.8	0.000943533	0.277037
B32	B	32	3670.96	3670.97	0.00907353	2.47171
B32	B	32	3670.96	3670.97	0.0150735	4.10616
B33	B	33	3785.98	3785.98	-0.00786647	-2.07779
B33	B	33	3785.98	3785.98	-0.00786647	-2.07779
B34	B	34	3885.05	3885.05	-0.00627647	-1.61554
B34	B	34	3885.05	3885.05	-0.00227647	-0.585955
Y5	Y	5	628.3	628.301	0.000448533	0.713883
Y6	Y	6	757.343	757.341	-0.00214147	-2.82761
Y8	Y	8	1013.5	1013.5	0.000318533	0.314291
Y9	Y	9	1100.53	1100.53	-0.00171147	-1.55513
Y9	Y	9	1100.53	1100.53	0.000288533	0.262177
Y10	Y	10	1229.57	1229.57	-0.00130147	-1.05847
Y10	Y	10	1229.57	1229.57	0.00269853	2.19469
Y11	Y	11	1357.67	1357.66	-0.00426147	-3.13882
Y11	Y	11	1357.67	1357.67	0.00173853	1.28053
Y12	Y	12	1470.75	1470.75	-0.00232147	-1.57842
Y15	Y	15	1755.88	1755.88	0.000218533	0.124458
Y15	Y	15	1755.88	1755.88	0.00221853	1.26349
Y18	Y	18	2158.05	2158.05	-0.000321467	-0.148962
Y18	Y	18	2158.05	2158.05	0.00267853	1.24118
Y20	Y	20	2386.16	2386.15	-0.00732147	-3.0683
Y21	Y	21	2487.21	2487.21	-0.00300147	-1.20676
Y24	Y	24	2813.44	2813.44	-0.00178147	-0.633198
Y29	Y	29	3437.85	3437.85	-0.00190147	-0.553098
Y31	Y	31	3631.93	3631.93	0.00172853	0.475927
Y31	Y	31	3631.93	3631.94	0.00872853	2.40328
Y32	Y	32	3760.97	3760.96	-0.0158615	-4.21739
Y32	Y	32	3760.97	3760.97	0.00113853	0.302723
Y33	Y	33	3848	3848	-0.00189147	-0.491545
Y33	Y	33	3848	3848.01	0.00710853	1.84733
Y34	Y	34	3947.07	3947.08	0.00469853	1.19038

## Sheet: S3_bottom up data
Accession	Description	ΣCoverage	Σ# Proteins	Σ# Unique Peptides	Σ# Peptides	Σ# PSMs	A5: Area	B5: Area	C5: Area	D5: Area	E5: Area	F5: Area	G5: Area	Score A2	Coverage A2	# Peptides A2	# PSM A2	Score B2	Coverage B2	# Peptides B2	# PSM B2	Score C2	Coverage C2	# Peptides C2	# PSM C2	Score D2	Coverage D2	# Peptides D2	# PSM D2	Score E2	Coverage E2	# Peptides E2	# PSM E2	Score F2	Coverage F2	# Peptides F2	# PSM F2	Score G2	Coverage G2	# Peptides G2	# PSM G2	# AAs	MW [kDa]	calc. pI
Q04446	1,4-alpha-glucan-branching enzyme OS=Homo sapiens OX=9606 GN=GBE1 PE=1 SV=3 - [GLGB_HUMAN]	7.55	1	3	3	9	3.43052e+06	1.42751e+06	1.86855e+06	2.23561e+06	0	0	0	9.67714	7.55	3	3	6.13644	4.42	2	2		0			9.00826	7.55	3	4		0				0				0			702	80.4226	6.31592
P61604	10 kDa heat shock protein, mitochondrial OS=Homo sapiens OX=9606 GN=HSPE1 PE=1 SV=2 - [CH10_HUMAN]	45.1	1	4	4	20	2.82756e+07	2.38243e+07	6.03353e+07	1.81797e+07	4.26122e+07	1.78182e+07	9.42261e+06	10.5595	35.29	3	4	10.3819	35.29	3	4	10.1458	25.49	2	3	10.788	35.29	3	3	18.1142	45.1	4	6		0				0			102	10.9249	8.92432
Q15029	116 kDa U5 small nuclear ribonucleoprotein component OS=Homo sapiens OX=9606 GN=EFTUD2 PE=1 SV=1 - [U5S1_HUMAN]	6.38	1	3	4	4	0	0	6.57003e+06	5.46673e+06	0	0	0		0				0			8.82158	5.35	3	3		0				0				0							972	109.366	4.99561
Q9NRX4	14 kDa phosphohistidine phosphatase OS=Homo sapiens OX=9606 GN=PHPT1 PE=1 SV=1 - [PHP14_HUMAN]	52.8	1	5	5	30	1.21207e+07	1.17534e+07	0	6.10085e+06	4.69914e+06	1.85507e+06	1.78915e+06	25.1652	38.4	3	7	33.0875	52.8	4	9					24.216	52.8	5	7	15.8915	35.2	3	5	6.92785	26.4	2	2		0			125	13.8237	6.07471
P31946	14-3-3 protein beta/alpha OS=Homo sapiens OX=9606 GN=YWHAB PE=1 SV=3 - [1433B_HUMAN]	54.07	1	9	13	96	4.89584e+07	2.83605e+07	8.35554e+07	3.61454e+07	5.52779e+07	2.25724e+07	4.6861e+06	82.8738	50.41	12	21	61.2291	49.19	10	16	64.3995	41.46	10	15	54.6835	34.96	8	14	61.1295	47.56	9	15	48.4048	36.59	7	12	9.38226	17.89	3	3	246	28.0648	4.83057
P62258	14-3-3 protein epsilon OS=Homo sapiens OX=9606 GN=YWHAE PE=1 SV=1 - [1433E_HUMAN]	61.57	1	16	17	181	7.57521e+07	6.26184e+07	6.58794e+07	3.88491e+07	8.21956e+07	1.69267e+07	1.74367e+07	116.499	61.57	14	35	111.687	61.57	14	35	51.743	49.8	11	15	72.3496	61.57	12	22	112.853	61.57	15	31	67.0524	61.57	13	22	62.2374	61.57	13	21	255	29.1554	4.7417
Q04917	14-3-3 protein eta OS=Homo sapiens OX=9606 GN=YWHAH PE=1 SV=4 - [1433F_HUMAN]	46.75	1	9	10	30	2.53372e+07	1.19755e+07	5.04427e+07	1.91769e+07	4.29867e+07	7.92204e+06	3.85566e+06	13.1642	28.86	6	6	11.1903	21.54	4	4		0			13.6223	17.48	4	4	36.4952	46.75	10	11	11.7052	14.63	3	3		0			246	28.201	4.84326
P61981	14-3-3 protein gamma OS=Homo sapiens OX=9606 GN=YWHAG PE=1 SV=2 - [1433G_HUMAN]	46.96	1	6	9	36	3.02207e+07	1.47733e+07	5.15906e+07	3.01646e+07	5.0665e+07	1.05889e+07	2.91898e+06	28.7355	28.34	6	7	15.7638	20.65	4	5	31.8262	38.87	6	8		0			46.9706	29.55	5	10	11.719	20.65	4	4		0			247	28.2849	4.89404
P31947	14-3-3 protein sigma OS=Homo sapiens OX=9606 GN=SFN PE=1 SV=1 - [1433S_HUMAN]	58.87	1	13	14	112	4.97044e+07	1.423e+07	2.35105e+08	6.16448e+07	3.99532e+07	6.22687e+06	2.05958e+06	65.3233	42.74	9	21	32.979	42.74	9	12	140.481	58.87	14	43	109.218	42.74	10	33		0				0				0			248	27.7567	4.7417
P27348	14-3-3 protein theta OS=Homo sapiens OX=9606 GN=YWHAQ PE=1 SV=1 - [1433T_HUMAN]	47.35	1	9	11	61	3.87482e+07	1.89521e+07	6.0178e+07	2.59172e+07	4.16605e+07	1.04578e+07	3.1678e+06	39.8728	26.12	7	10	49.0842	42.45	10	12	49.0443	35.1	7	11	34.037	31.02	7	9	46.7988	38.78	9	11	17.3854	22.04	4	4	16.5622	22.04	4	4	245	27.7468	4.77979
P63104	14-3-3 protein zeta/delta OS=Homo sapiens OX=9606 GN=YWHAZ PE=1 SV=1 - [1433Z_HUMAN]	59.59	1	13	15	164	1.33225e+08	8.03031e+07	1.99551e+08	6.80146e+07	1.01433e+08	4.53502e+07	1.18187e+07	116.654	55.92	13	29	99.0924	56.73	14	27	87.7867	43.67	9	21	86.1676	53.06	12	23	126.866	56.73	13	32	85.1563	53.06	11	22	28.6943	38.78	7	10	245	27.7277	4.79248
Q9NQ66	1-phosphatidylinositol 4,5-bisphosphate phosphodiesterase beta-1 OS=Homo sapiens OX=9606 GN=PLCB1 PE=1 SV=1 - [PLCB1_HUMAN]	2.71	1	2	2	3	0	0	0	0	806901	0	0		0				0				0				0			10.0112	2.71	2	3		0				0			1216	138.48	6.22705
P51178	1-phosphatidylinositol 4,5-bisphosphate phosphodiesterase delta-1 OS=Homo sapiens OX=9606 GN=PLCD1 PE=1 SV=2 - [PLCD1_HUMAN]	30.29	1	14	14	32	6.60096e+06	5.47435e+06	9.3453e+06	3.4689e+06	5.92099e+06	0	941018	30.1974	15.74	6	6	42.5982	20.77	9	9	5.58571	2.78	2	2	25.813	14.55	6	6	30.1464	19.84	9	9		0				0			756	85.611	6.69775
P09543	2',3'-cyclic-nucleotide 3'-phosphodiesterase OS=Homo sapiens OX=9606 GN=CNP PE=1 SV=2 - [CN37_HUMAN]	33.49	1	17	17	51	3.54765e+06	7.91508e+06	7.48459e+06	3.78498e+06	1.7334e+08	0	1.54462e+06	10.6179	11.64	2	2	29.5795	18.05	4	6	14.1376	14.73	3	3	11.6875	14.73	3	3	138.317	33.49	17	37		0				0			421	47.5487	9.0708
Q16698	2,4-dienoyl-CoA reductase, mitochondrial OS=Homo sapiens OX=9606 GN=DECR1 PE=1 SV=1 - [DECR_HUMAN]	29.85	1	6	6	15	1.13487e+06	2.91222e+06	8.66734e+06	3.50516e+06	3.73158e+06	4.6358e+06	1.86237e+06		0			7.6731	10.75	2	2	11.9243	11.04	3	3	7.93527	13.13	3	3	14.5722	14.03	3	4	12.241	17.31	3	3		0			335	36.0448	9.27588
Q99460	26S proteasome non-ATPase regulatory subunit 1 OS=Homo sapiens OX=9606 GN=PSMD1 PE=1 SV=2 - [PSMD1_HUMAN]	12.49	1	6	6	11	3.8501e+06	3.10791e+06	1.20275e+07	4.61209e+06	1.98032e+06	584483	0	8.81092	5.67	2	2		0			14.8147	6.82	4	5	7.53356	5.46	2	2		0			6.33837	4.72	2	2		0			953	105.769	5.38916
O75832	26S proteasome non-ATPase regulatory subunit 10 OS=Homo sapiens OX=9606 GN=PSMD10 PE=1 SV=1 - [PSD10_HUMAN]	21.24	1	3	3	6	8.80832e+06	3.45033e+06	0	2.89263e+06	4.833e+06	2.46265e+06	0	3.78596	21.24	2	2	3.41392	21.24	2	2		0				0			6.67165	19.03	2	2		0				0			226	24.4124	6.1001
O00231	26S proteasome non-ATPase regulatory subunit 11 OS=Homo sapiens OX=9606 GN=PSMD11 PE=1 SV=3 - [PSD11_HUMAN]	27.01	1	9	9	17	2.68072e+06	1.17138e+06	1.19264e+07	2.50032e+06	0	0	0	15.7061	13.03	4	4	8.7978	8.77	3	3	16.8708	14.93	5	5	17.9464	14.93	5	5		0				0				0			422	47.434	6.48096
Q9UNM6	26S proteasome non-ATPase regulatory subunit 13 OS=Homo sapiens OX=9606 GN=PSMD13 PE=1 SV=2 - [PSD13_HUMAN]	19.68	1	5	5	6	1.75483e+06	2.16892e+06	9.07704e+06	0	0	0	0	5.89167	8.51	2	2		0			15.133	11.17	3	4		0				0											376	42.9181	5.80811
Q13200	26S proteasome non-ATPase regulatory subunit 2 OS=Homo sapiens OX=9606 GN=PSMD2 PE=1 SV=3 - [PSMD2_HUMAN]	17.95	1	13	13	21	3.422e+06	2.7214e+06	2.226e+07	1.88507e+06	1.39984e+06	3.12818e+06	0	6.24639	5.18	2	2		0			25.8595	16.74	10	10	12.4001	8.7	5	5	7.44008	4.96	2	2	5.18355	3.85	2	2		0			908	100.136	5.19873
O43242	26S proteasome non-ATPase regulatory subunit 3 OS=Homo sapiens OX=9606 GN=PSMD3 PE=1 SV=2 - [PSMD3_HUMAN]	15.54	1	6	6	8	1.93814e+06	0	6.79789e+06	2.84864e+06	0	0	0	11.4565	7.68	3	3		0			20.2375	12.73	5	5		0				0				0				0			534	60.9395	8.44092
P55036	26S proteasome non-ATPase regulatory subunit 4 OS=Homo sapiens OX=9606 GN=PSMD4 PE=1 SV=1 - [PSMD4_HUMAN]	15.38	1	3	3	3	8.15022e+06	0	7.98598e+06	0	0	0	0	7.25649	15.38	3	3		0				0				0				0				0				0			377	40.7112	4.79248
Q16401	26S proteasome non-ATPase regulatory subunit 5 OS=Homo sapiens OX=9606 GN=PSMD5 PE=1 SV=3 - [PSMD5_HUMAN]	12.3	2	4	4	4	2.76494e+06	0	4.73734e+06	0	0	0	0	8.56369	6.75	2	2		0			3.54983	5.56	2	2		0				0				0				0			504	56.1604	5.47803
Q15008	26S proteasome non-ATPase regulatory subunit 6 OS=Homo sapiens OX=9606 GN=PSMD6 PE=1 SV=1 - [PSMD6_HUMAN]	12.34	1	4	4	4	0	0	5.647e+06	1.26703e+06	0	0	0		0				0			10.7744	12.34	4	4		0				0				0				0			389	45.5023	5.61768
P51665	26S proteasome non-ATPase regulatory subunit 7 OS=Homo sapiens OX=9606 GN=PSMD7 PE=1 SV=2 - [PSMD7_HUMAN]	7.1	1	2	2	2	0	0	9816056	2.47571e+06	1.69428e+06	0	0		0								0			3.60004	7.1	2	2		0				0				0			324	37.0025	6.771
P62333	26S proteasome regulatory subunit 10B OS=Homo sapiens OX=9606 GN=PSMC6 PE=1 SV=1 - [PRS10_HUMAN]	29.31	1	7	7	11	2.91391e+06	0	4827603	2.95014e+06	0	0	0	13.7078	14.65	4	4		0			11.6451	14.4	3	3	11.9296	15.42	4	4		0				0				0			389	44.1451	7.48877
P62191	26S proteasome regulatory subunit 4 OS=Homo sapiens OX=9606 GN=PSMC1 PE=1 SV=1 - [PRS4_HUMAN]	9.77	1	3	3	5	897741	1.20549e+06	1.14174e+07	645844	0	0	0		0			8.46455	9.77	3	3	2.39331	6.36	2	2		0				0				0				0			440	49.1537	6.21436
P17980	26S proteasome regulatory subunit 6A OS=Homo sapiens OX=9606 GN=PSMC3 PE=1 SV=3 - [PRS6A_HUMAN]	29.61	1	8	8	17	3.58486e+06	1.17673e+06	1.05154e+07	1.50177e+06	1.29974e+06	1.42826e+06	0	34.0499	25.06	7	9		0			16.5009	10.48	3	4	15.4029	15.03	4	4		0				0				0			439	49.1725	5.23682
P43686	26S proteasome regulatory subunit 6B OS=Homo sapiens OX=9606 GN=PSMC4 PE=1 SV=2 - [PRS6B_HUMAN]	24.88	1	6	6	15	2.95146e+06	364051	5.20266e+06	1.73261e+06	0	0	0	19.8609	13.64	3	5		0			27.5921	15.31	3	6	15.2346	9.33	3	4		0				0				0			418	47.3365	5.21143
P35998	26S proteasome regulatory subunit 7 OS=Homo sapiens OX=9606 GN=PSMC2 PE=1 SV=3 - [PRS7_HUMAN]	10.16	1	2	2	3	1.61313e+06	709462	8.06236e+06	1.8554e+06	0	0	0		0				0			7.46834	10.16	2	3		0				0				0				0			433	48.6031	5.94775
P62195	26S proteasome regulatory subunit 8 OS=Homo sapiens OX=9606 GN=PSMC5 PE=1 SV=1 - [PRS8_HUMAN]	19.7	1	5	5	18	3.92802e+06	1.0356e+06	4.90668e+06	1.98532e+06	0	1.39838e+06	0	19.344	19.7	5	5	11.5193	7.88	2	3	9.7098	10.34	3	3	13.9524	15.02	4	4		0			8.78893	11.08	3	3		0			406	45.5971	7.54736
O43598	2'-deoxynucleoside 5'-phosphate N-hydrolase 1 OS=Homo sapiens OX=9606 GN=DNPH1 PE=1 SV=1 - [DNPH1_HUMAN]	16.09	1	2	2	4	7.30866e+06	7.11087e+06	1.09142e+07	8.10566e+06	8.68477e+06	0	3.14676e+06	4.99812	16.09	2	2	4.98194	16.09	2	2		0				0				0								0			174	19.0966	5.04639
P52758	2-iminobutanoate/2-iminopropanoate deaminase OS=Homo sapiens OX=9606 GN=RIDA PE=1 SV=1 - [RIDA_HUMAN]	33.58	1	3	3	5	3.60385e+06	3.0044e+06	0	0	7.95396e+06	0	3.62298e+06		0			7.68916	19.71	2	2						0			13.3527	33.58	3	3						0			137	14.4846	8.67529
Q02218	2-oxoglutarate dehydrogenase, mitochondrial OS=Homo sapiens OX=9606 GN=OGDH PE=1 SV=3 - [ODO1_HUMAN]	16.13	1	9	9	16	2.30682e+06	0	8.45405e+06	1.91372e+06	2.26981e+06	0	0	7.28182	3.52	2	2		0			28.7784	12.61	7	8	7.52917	2.74	2	3	8.71634	2.74	2	3		0				0			1023	115.861	6.85889
Q99714	3-hydroxyacyl-CoA dehydrogenase type-2 OS=Homo sapiens OX=9606 GN=HSD17B10 PE=1 SV=3 - [HCD2_HUMAN]	69.35	1	11	11	54	7.32346e+06	9.75384e+06	2.4863e+07	7.70077e+06	3.59245e+06	4.809e+06	0	34.7868	58.62	8	10	48.005	58.62	9	11	30.0877	51.34	8	9	43.5374	58.62	8	11	16.6828	27.59	4	4	40.2806	54.79	8	9		0			261	26.9061	7.78174
Q9BUT1	3-hydroxybutyrate dehydrogenase type 2 OS=Homo sapiens OX=9606 GN=BDH2 PE=1 SV=2 - [BDH2_HUMAN]	36.33	1	6	6	12	5.81424e+06	4.31535e+06	1.07339e+07	910795	3.79203e+06	5.19172e+06	1.52524e+06	13.7596	20.41	3	3	11.8511	13.47	2	3		0			7.49886	13.06	2	2	9.05179	11.02	2	2	7.08092	10.2	2	2		0			245	26.7067	7.6499
P42765	3-ketoacyl-CoA thiolase, mitochondrial OS=Homo sapiens OX=9606 GN=ACAA2 PE=1 SV=2 - [THIM_HUMAN]	45.09	1	10	10	20	4.71024e+06	1.45772e+06	9.24861e+06	2.58866e+06	4.51245e+06	0	0	25.8541	31.49	6	6	9.59409	11.84	2	2	24.7346	20.65	6	6	11.4438	17.13	3	3	12.519	14.86	3	3						0			397	41.8976	8.08936
P09110	3-ketoacyl-CoA thiolase, peroxisomal OS=Homo sapiens OX=9606 GN=ACAA1 PE=1 SV=2 - [THIK_HUMAN]	26.89	1	6	6	6	0	0	1.03116e+07	4.258e+06	3.62476e+06	0	0		0				0			17.2666	26.89	6	6		0				0				0				0			424	44.2639	8.44092
Q06136	3-ketodihydrosphingosine reductase OS=Homo sapiens OX=9606 GN=KDSR PE=1 SV=1 - [KDSR_HUMAN]	8.13	1	2	2	2	4.60209e+06	2.30042e+06	1.21238e+07	3.75939e+06	2.30805e+06	0	0		0				0			3.32154	8.13	2	2		0				0								0			332	36.1636	7.12256
P25325	3-mercaptopyruvate sulfurtransferase OS=Homo sapiens OX=9606 GN=MPST PE=1 SV=3 - [THTM_HUMAN]	26.26	1	5	5	7	3.11407e+06	1.7491e+06	5.98175e+06	1.58727e+06	1.21833e+06	598632	0	21.5249	26.26	5	5	9.79101	14.48	2	2		0				0				0				0							297	33.1576	6.59521
P46783	40S ribosomal protein S10 OS=Homo sapiens OX=9606 GN=RPS10 PE=1 SV=1 - [RS10_HUMAN]	24.24	1	3	3	7	6.51423e+06	3.50878e+06	1.62932e+07	5.72641e+06	2.95077e+06	1.58684e+06	0	7.70646	14.55	2	2		0			7.01481	14.55	2	2	10.2329	24.24	3	3		0				0							165	18.8859	10.1548
P62280	40S ribosomal protein S11 OS=Homo sapiens OX=9606 GN=RPS11 PE=1 SV=3 - [RS11_HUMAN]	31.65	1	4	4	4	4.79165e+06	0	6.20558e+06	1.56639e+06	0	1.18326e+06	0	11.8351	31.65	4	4		0				0				0								0				0			158	18.419	10.3013
P25398	40S ribosomal protein S12 OS=Homo sapiens OX=9606 GN=RPS12 PE=1 SV=3 - [RS12_HUMAN]	40.15	1	5	5	23	2.98997e+07	1.28691e+07	4.75453e+07	1.33844e+07	8.88164e+06	1.22051e+07	0	14.4368	40.15	4	5	7.84648	25	2	2	15.7043	31.82	3	4	11.5782	40.15	4	4	12.0934	31.82	3	4	13.6041	39.39	4	4					132	14.5055	7.21045
P62263	40S ribosomal protein S14 OS=Homo sapiens OX=9606 GN=RPS14 PE=1 SV=3 - [RS14_HUMAN]	32.45	1	5	5	15	1.53901e+07	4.94762e+06	2.49614e+07	5.47046e+06	5.15101e+06	4.98522e+06	0	15.4746	29.8	3	4	12.1818	21.19	2	4	14.9934	32.45	4	4		0			9.08884	29.8	3	3		0							151	16.2625	10.0522
P62244	40S ribosomal protein S15a OS=Homo sapiens OX=9606 GN=RPS15A PE=1 SV=2 - [RS15A_HUMAN]	32.31	1	4	4	9	1.10348e+07	1.08318e+07	8.21326e+07	5.7559e+06	0	9.31011e+06	0	10.2209	25.38	3	3		0			8.57935	17.69	2	2	8.21056	17.69	2	2		0			8.29546	17.69	2	2					130	14.83	10.1255
P62249	40S ribosomal protein S16 OS=Homo sapiens OX=9606 GN=RPS16 PE=1 SV=2 - [RS16_HUMAN]	38.36	1	5	5	10	8.25501e+06	0	1.35866e+07	2.10393e+06	4.78297e+06	4.80848e+06	0	12.1377	30.82	4	4		0			4.91429	15.07	2	2	5.24969	15.07	2	2	7.6437	15.75	2	2		0				0			146	16.435	10.2134
P08708	40S ribosomal protein S17 OS=Homo sapiens OX=9606 GN=RPS17 PE=1 SV=2 - [RS17_HUMAN]	51.85	1	5	5	11	8.57211e+06	2.84693e+06	5.04151e+06	2.24136e+06	1.56907e+06	0	0	15.5997	51.85	5	5	5.02459	35.56	2	2	8.16629	32.59	2	2		0			7.7966	32.59	2	2									135	15.5404	9.84717
P62269	40S ribosomal protein S18 OS=Homo sapiens OX=9606 GN=RPS18 PE=1 SV=3 - [RS18_HUMAN]	21.71	1	4	4	15	5.40695e+06	0	2.19858e+07	5.94103e+06	0	3.32724e+06	0	12.9844	13.82	3	4		0			18.4497	21.71	4	5	11.112	21.71	3	3		0			10.5109	7.89	2	3		0			152	17.7079	10.9897
P39019	40S ribosomal protein S19 OS=Homo sapiens OX=9606 GN=RPS19 PE=1 SV=2 - [RS19_HUMAN]	30.34	1	5	5	14	1.05152e+07	1.29998e+06	4.26967e+07	8.84128e+06	3.72424e+06	2.26782e+06	0	8.55873	10.34	2	2		0			17.7824	22.76	4	5	15.3715	24.14	3	4		0			10.776	16.55	3	3		0			145	16.0505	10.3159
P15880	40S ribosomal protein S2 OS=Homo sapiens OX=9606 GN=RPS2 PE=1 SV=2 - [RS2_HUMAN]	19.8	1	5	5	16	1.48972e+07	0	3.83571e+07	6.1563e+06	1.07975e+06	2.44683e+06	0	19.627	19.8	5	6		0			22.6744	19.8	5	7	10.2882	12.29	3	3		0				0				0			293	31.3046	10.2427
P60866	40S ribosomal protein S20 OS=Homo sapiens OX=9606 GN=RPS20 PE=1 SV=1 - [RS20_HUMAN]	19.33	1	2	2	5	1.88512e+07	4.73493e+06	0	8.19082e+06	6.41258e+06	6.78676e+06	0		0				0							8.96784	19.33	2	3	5.92918	19.33	2	2		0				0			119	13.3643	9.93506
P63220	40S ribosomal protein S21 OS=Homo sapiens OX=9606 GN=RPS21 PE=1 SV=1 - [RS21_HUMAN]	44.58	1	3	3	7	1.45869e+07	0	2.47443e+07	0	0	2.92149e+06	0	15.2004	44.58	3	4		0			10.3335	44.58	3	3		0								0				0			83	9.10557	8.49951
P62847	40S ribosomal protein S24 OS=Homo sapiens OX=9606 GN=RPS24 PE=1 SV=1 - [RS24_HUMAN]	19.55	1	2	2	2	5.02747e+06	0	1.80394e+07	2.87714e+06	0	0	0	6.59156	19.55	2	2						0				0				0											133	15.4134	10.7847
P62854	40S ribosomal protein S26 OS=Homo sapiens OX=9606 GN=RPS26 PE=1 SV=3 - [RS26_HUMAN]	20.87	1	2	2	5	5.69715e+06	0	1.51076e+07	1.75275e+06	2.09994e+06	0	0	10.8826	20.87	2	3						0			6.37151	20.87	2	2		0				0				0			115	13.0071	11.0044
P23396	40S ribosomal protein S3 OS=Homo sapiens OX=9606 GN=RPS3 PE=1 SV=2 - [RS3_HUMAN]	53.91	1	10	10	36	1.32391e+07	5.45629e+06	5.31987e+07	8828751	6.52141e+06	9.44487e+06	0	22.1428	32.1	6	6	14.2425	19.34	4	4	28.2112	30.45	6	9	23.5201	35.8	7	7	17.8672	25.93	5	5	18.3418	18.52	4	5		0			243	26.6714	9.65674
P61247	40S ribosomal protein S3a OS=Homo sapiens OX=9606 GN=RPS3A PE=1 SV=2 - [RS3A_HUMAN]	30.3	1	6	6	11	2.15091e+07	8.15847e+06	3.84445e+07	0	7.03934e+06	6.80097e+06	0	8.59997	25.38	5	5		0			13.5349	15.15	3	4		0			4.28699	10.23	2	2		0				0			264	29.9257	9.72998
P62701	40S ribosomal protein S4, X isoform OS=Homo sapiens OX=9606 GN=RPS4X PE=1 SV=2 - [RS4X_HUMAN]	32.7	1	9	9	24	9.09157e+06	2.66041e+06	1.77533e+07	2.77132e+06	4.18579e+06	3.06516e+06	0	21.2431	24.33	5	6	8.1585	9.89	2	2	22.8703	22.43	6	7	11.7362	16.35	3	3	10.8441	13.69	3	3	12.1014	15.21	3	3		0			263	29.5791	10.1548
P46782	40S ribosomal protein S5 OS=Homo sapiens OX=9606 GN=RPS5 PE=1 SV=4 - [RS5_HUMAN]	13.73	1	2	2	12	1.23241e+07	7.45926e+06	3.84141e+07	9.74798e+06	2.96622e+06	3.90752e+06	0	26.2313	13.73	2	5		0				0				0			8.20971	13.73	2	2	22.1552	13.73	2	5					204	22.8621	9.71533
P62753	40S ribosomal protein S6 OS=Homo sapiens OX=9606 GN=RPS6 PE=1 SV=1 - [RS6_HUMAN]	15.66	1	3	3	4	9.95569e+06	2.18869e+06	5.24067e+06	0	4.91614e+06	2.91366e+06	0		0				0				0				0			7.50573	10.84	2	2	5.91612	9.64	2	2		0			249	28.663	10.8433
P62081	40S ribosomal protein S7 OS=Homo sapiens OX=9606 GN=RPS7 PE=1 SV=1 - [RS7_HUMAN]	38.66	1	4	4	8	3.934e+06	1.32552e+06	2.61445e+06	1.55962e+06	0	1.31998e+06	0	11.3384	38.66	4	4		0				0			6.76994	17.53	2	2		0			2.19114	21.65	2	2		0			194	22.1133	10.0962
P62241	40S ribosomal protein S8 OS=Homo sapiens OX=9606 GN=RPS8 PE=1 SV=2 - [RS8_HUMAN]	26.92	1	4	4	10	6.79448e+06	0	1.57152e+07	1.94668e+06	4.85559e+06	0	0	16.7735	26.92	4	4		0			7.53145	13.46	2	2	13.3577	19.71	3	4		0				0				0			208	24.1902	10.3159
P46781	40S ribosomal protein S9 OS=Homo sapiens OX=9606 GN=RPS9 PE=1 SV=3 - [RS9_HUMAN]	10.31	1	2	2	2	6.31112e+06	3.2615e+06	2.29704e+07	4.08594e+06	4.92837e+06	3.63735e+06	0		0				0			5.31542	10.31	2	2		0				0				0							194	22.5776	10.6528
P08865	40S ribosomal protein SA OS=Homo sapiens OX=9606 GN=RPSA PE=1 SV=4 - [RSSA_HUMAN]	49.15	1	8	8	34	2.11879e+07	2.85561e+07	4.01374e+07	1.05045e+07	4.21819e+07	8.21647e+06	0	42.2369	45.76	7	10	12.8229	18.31	3	3	26.1281	36.61	6	7	27.0516	28.14	5	6	15.6304	19.32	3	3	21.2094	22.03	4	5		0			295	32.8334	4.86865
P80404	4-aminobutyrate aminotransferase, mitochondrial OS=Homo sapiens OX=9606 GN=ABAT PE=1 SV=3 - [GABT_HUMAN]	38.4	1	13	13	26	0	3.1127e+06	2.83397e+06	2.06044e+06	1.19036e+07	0	1.00448e+06		0			25.023	22.4	7	7		0			18.0076	14.8	5	5	49.404	28.4	9	12		0			6.40989	9.4	2	2	500	56.4026	7.95752
P08195	4F2 cell-surface antigen heavy chain OS=Homo sapiens OX=9606 GN=SLC3A2 PE=1 SV=3 - [4F2_HUMAN]	22.38	1	10	10	25	1.09419e+06	1.21298e+06	1.28748e+07	3.43953e+06	20820557	894480	3.5694e+06		0			10.3724	9.05	3	3	20.7713	13.65	6	6	17.4691	12.7	4	4	38.3574	20	8	9		0			10.7274	8.25	3	3	630	67.9517	5.0083
P49189	4-trimethylaminobutyraldehyde dehydrogenase OS=Homo sapiens OX=9606 GN=ALDH9A1 PE=1 SV=3 - [AL9A1_HUMAN]	44.74	1	18	18	69	1.77715e+07	1.36729e+07	8.63488e+06	9.75939e+06	1.5177e+07	4.58106e+06	4.07481e+06	45.8524	30.57	11	12	55.7185	38.46	14	15	19.7365	14.37	6	6	34.121	27.53	10	10	43.0345	32.79	13	13	21.3305	12.75	5	5	34.9504	21.86	8	8	494	53.767	5.87158
P21589	5'-nucleotidase OS=Homo sapiens OX=9606 GN=NT5E PE=1 SV=1 - [5NTD_HUMAN]	45.99	1	17	17	27	1.58011e+06	0	1.52898e+07	0	0	9.88752e+06	0	8.23647	12.2	3	3		0			22.592	17.94	6	7		0				0			57.3214	39.9	15	17		0			574	63.3275	7.03467
P10809	60 kDa heat shock protein, mitochondrial OS=Homo sapiens OX=9606 GN=HSPD1 PE=1 SV=2 - [CH60_HUMAN]	51.83	1	23	23	145	3.20906e+07	2.08575e+07	5.18961e+07	2.04857e+07	2.91409e+07	1.28144e+07	3.47119e+06	108.176	48.52	18	28	82.8608	43.28	16	24	82.1197	35.78	17	23	82.69	42.23	17	24	84.3643	32.81	15	22	56.7673	28.1	10	17	20.5819	16.06	7	7	573	61.0164	5.87158
P10155	60 kDa SS-A/Ro ribonucleoprotein OS=Homo sapiens OX=9606 GN=TROVE2 PE=1 SV=2 - [RO60_HUMAN]	11.52	1	5	5	10	4.31621e+06	2.76791e+06	7.92864e+06	1.67598e+06	0	0	0	18.2085	11.52	5	5	10.8201	7.06	3	3	6.55342	4.65	2	2		0				0				0				0			538	60.6312	8.03076
P05388	60S acidic ribosomal protein P0 OS=Homo sapiens OX=9606 GN=RPLP0 PE=1 SV=1 - [RLA0_HUMAN]	40.06	1	9	9	38	1.52196e+07	4.2138e+06	3.79584e+07	9.01432e+06	6.63689e+06	8.61156e+06	0	27.979	34.07	7	8	14.8217	23.97	4	4	28.8847	32.81	6	8	14.3827	20.19	4	4	18.4196	27.13	5	5	31.8412	33.12	7	9					317	34.2518	5.97314
P05386	60S acidic ribosomal protein P1 OS=Homo sapiens OX=9606 GN=RPLP1 PE=1 SV=1 - [RLA1_HUMAN]	51.75	1	2	2	4	3.93948e+07	1.61248e+07	3.46912e+07	1.13173e+07	7.00807e+06	1.22725e+07	1.6359e+06		0				0			8.47335	51.75	2	2		0			8.84876	51.75	2	2		0				0			114	11.5067	4.32275
P05387	60S acidic ribosomal protein P2 OS=Homo sapiens OX=9606 GN=RPLP2 PE=1 SV=1 - [RLA2_HUMAN]	73.91	1	6	6	41	5.90903e+07	1.94464e+07	1.17683e+08	1.29236e+07	7.63144e+06	3.13309e+07	2.97828e+06	41.9785	73.04	5	9	23.8807	73.04	5	6	47.3332	73.91	6	10	18.6383	62.61	4	4	13.9193	48.7	3	3	38.8884	73.04	5	9		0			115	11.6578	4.53857
P27635	60S ribosomal protein L10 OS=Homo sapiens OX=9606 GN=RPL10 PE=1 SV=4 - [RL10_HUMAN]	19.16	1	3	3	6	7.46056e+06	4.19664e+06	1.7763e+07	0	0	0	0	13.8659	19.16	3	3		0			9.99821	19.16	2	3		0				0											214	24.5879	10.0815
P62906	60S ribosomal protein L10a OS=Homo sapiens OX=9606 GN=RPL10A PE=1 SV=2 - [RL10A_HUMAN]	26.27	1	4	4	13	1.15635e+07	3.55769e+06	1.19768e+07	5.81231e+06	2.84275e+06	7.15157e+06	0	15.2272	26.27	4	5	7.33404	12.44	2	2	11.2379	12.44	2	3	6.27043	18.89	3	3		0				0				0			217	24.8155	9.93506
P62913	60S ribosomal protein L11 OS=Homo sapiens OX=9606 GN=RPL11 PE=1 SV=2 - [RL11_HUMAN]	12.92	1	2	2	8	1.78707e+07	5.64454e+06	3.84347e+07	9.9119e+06	6.89749e+06	8.49027e+06	0	7.3489	12.92	2	2	6.73405	12.92	2	2	6.54698	12.92	2	2	7.11569	12.92	2	2		0				0							178	20.2396	9.59814
P30050	60S ribosomal protein L12 OS=Homo sapiens OX=9606 GN=RPL12 PE=1 SV=1 - [RL12_HUMAN]	49.09	1	6	6	32	1.95727e+07	7.1159e+06	5.87048e+07	9.26137e+06	7.55988e+06	1.44119e+07	0	33.8735	49.09	5	7	16.6421	30.3	3	4	27.834	30.3	4	7	20.2038	49.09	5	5	14.4109	30.3	3	3	25.7243	30.3	3	6		0			165	17.8075	9.42236
P26373	60S ribosomal protein L13 OS=Homo sapiens OX=9606 GN=RPL13 PE=1 SV=4 - [RL13_HUMAN]	14.22	1	3	3	3	6.01474e+06	3.6393e+06	23631346	0	2.6633e+06	0	0	8.6455	14.22	3	3		0				0				0				0				0							211	24.2465	11.6489
P50914	60S ribosomal protein L14 OS=Homo sapiens OX=9606 GN=RPL14 PE=1 SV=4 - [RL14_HUMAN]	15.35	1	3	3	4	6.49642e+06	3.10075e+06	1.98789e+07	0	0	4.68986e+06	0	6.45334	10.23	2	2		0			5.95964	10.7	2	2		0				0				0				0			215	23.417	10.9312
P61313	60S ribosomal protein L15 OS=Homo sapiens OX=9606 GN=RPL15 PE=1 SV=2 - [RL15_HUMAN]	19.12	1	3	3	9	6.01502e+06	3.3849e+06	3.20218e+07	3.5641e+06	1.28977e+06	7.4141e+06	0	9.0318	19.12	3	4		0			9.55078	11.27	2	3		0			4.67347	14.71	2	2		0				0			204	24.1311	11.6196
P18621	60S ribosomal protein L17 OS=Homo sapiens OX=9606 GN=RPL17 PE=1 SV=3 - [RL17_HUMAN]	11.41	1	2	2	3	9.39719e+06	1.39684e+06	1.19141e+07	0	0	0	0	9.41951	11.41	2	3		0				0												0							184	21.3833	10.1694
Q07020	60S ribosomal protein L18 OS=Homo sapiens OX=9606 GN=RPL18 PE=1 SV=2 - [RL18_HUMAN]	18.09	1	3	3	3	0	182109	1.15252e+07	3.53169e+06	2.72679e+06	0	0		0				0			10.0255	18.09	3	3		0				0											188	21.6211	11.7222
Q02543	60S ribosomal protein L18a OS=Homo sapiens OX=9606 GN=RPL18A PE=1 SV=2 - [RL18A_HUMAN]	13.07	1	2	2	2	7.5728e+06	0	18332752	0	0	3.01649e+06	0	5.0677	13.07	2	2		0				0				0				0				0				0			176	20.7489	10.7114
P46778	60S ribosomal protein L21 OS=Homo sapiens OX=9606 GN=RPL21 PE=1 SV=2 - [RL21_HUMAN]	20.63	1	2	2	2	4.36419e+06	0	0	0	0	0	0	8.74833	20.63	2	2		0								0				0				0							160	18.5531	10.4917
P35268	60S ribosomal protein L22 OS=Homo sapiens OX=9606 GN=RPL22 PE=1 SV=2 - [RL22_HUMAN]	21.88	1	2	2	2	5.81032e+06	4.16879e+06	3.5992e+07	5.25855e+06	5.0052e+06	5843209	0	6.89529	21.88	2	2		0				0				0				0				0				0			128	14.7778	9.18799
P62750	60S ribosomal protein L23a OS=Homo sapiens OX=9606 GN=RPL23A PE=1 SV=1 - [RL23A_HUMAN]	16.03	1	2	2	4	1.82014e+07	4.34626e+06	6.12382e+06	4.42115e+06	1.27831e+07	0	0		0			3.70175	16.03	2	2		0			5.50943	16.03	2	2		0				0				0			156	17.6841	10.4478
P61254	60S ribosomal protein L26 OS=Homo sapiens OX=9606 GN=RPL26 PE=1 SV=1 - [RL26_HUMAN]	12.41	1	2	2	2	8.70997e+06	0	1.12534e+07	0	0	0	0		0				0			5.6801	12.41	2	2										0							145	17.2475	10.5503
P61353	60S ribosomal protein L27 OS=Homo sapiens OX=9606 GN=RPL27 PE=1 SV=2 - [RL27_HUMAN]	17.65	1	2	2	2	6.54908e+06	3.35318e+06	0	0	0	4.10499e+06	0	0	17.65	2	2		0				0												0							136	15.7877	10.5649
P46776	60S ribosomal protein L27a OS=Homo sapiens OX=9606 GN=RPL27A PE=1 SV=2 - [RL27A_HUMAN]	14.86	1	2	2	4	8.04378e+06	0	1.2204e+07	0	0	1.70727e+06	0	5.2032	14.86	2	2					5.84968	14.86	2	2		0								0							148	16.551	11.0044
P39023	60S ribosomal protein L3 OS=Homo sapiens OX=9606 GN=RPL3 PE=1 SV=2 - [RL3_HUMAN]	11.66	1	4	4	7	5.90831e+06	3.0701e+06	2.04699e+07	6.51284e+06	1.92394e+06	0	0	20.3646	11.66	4	5		0			6.16092	5.21	2	2		0				0				0				0			403	46.0798	10.1841
P62888	60S ribosomal protein L30 OS=Homo sapiens OX=9606 GN=RPL30 PE=1 SV=2 - [RL30_HUMAN]	51.3	1	4	4	20	9.97753e+06	4.17428e+06	2.67437e+07	4.29769e+06	3.05503e+06	6.15361e+06	0	22.6436	51.3	4	5	18.3694	40.87	3	4	17.5895	40.87	3	4	13.5051	40.87	3	3	8.945	30.43	2	2	9.376	30.43	2	2		0			115	12.7757	9.62744
P62910	60S ribosomal protein L32 OS=Homo sapiens OX=9606 GN=RPL32 PE=1 SV=2 - [RL32_HUMAN]	16.3	1	2	2	5	2.04069e+06	707631	1.43935e+07	0	0	899977	0	5.07409	16.3	2	2		0			7.76309	16.3	2	3										0							135	15.8498	11.3267
Q9Y3U8	60S ribosomal protein L36 OS=Homo sapiens OX=9606 GN=RPL36 PE=1 SV=3 - [RL36_HUMAN]	12.38	1	2	2	2	6.34142e+06	0	0	0	0	0	0	6.39043	12.38	2	2										0															105	12.2459	11.5903
P36578	60S ribosomal protein L4 OS=Homo sapiens OX=9606 GN=RPL4 PE=1 SV=5 - [RL4_HUMAN]	15.22	1	5	5	19	1.56859e+07	5.96442e+06	3.53651e+07	3.53654e+06	6.11981e+06	1.11424e+07	0	10.6418	15.22	4	5	3.94559	9.84	2	2	9.32707	9.84	3	4	8.53767	12.65	3	4	9.4655	12.65	4	4		0				0			427	47.6674	11.063
P46777	60S ribosomal protein L5 OS=Homo sapiens OX=9606 GN=RPL5 PE=1 SV=3 - [RL5_HUMAN]	32.66	1	8	8	19	1.51926e+07	0	1.96491e+07	3.53841e+06	3.97281e+06	4.69023e+06	0	18.9597	23.91	6	6		0			18.2807	14.81	3	5	9.15904	13.47	3	3	5.30113	10.1	2	2	9.52612	15.82	3	3		0			297	34.3407	9.71533
Q02878	60S ribosomal protein L6 OS=Homo sapiens OX=9606 GN=RPL6 PE=1 SV=3 - [RL6_HUMAN]	27.43	1	6	6	9	6.77158e+06	7.12054e+06	2.1267e+07	0	3.40324e+06	4.57359e+06	0	16.5787	24.31	5	6		0			8.95427	13.19	3	3		0				0				0				0			288	32.7076	10.5796
P18124	60S ribosomal protein L7 OS=Homo sapiens OX=9606 GN=RPL7 PE=1 SV=1 - [RL7_HUMAN]	31.05	1	8	8	21	1.25951e+07	5.29157e+06	3.27917e+07	5.06158e+06	6.72415e+06	0	0	17.2968	21.77	4	5	10.1225	12.5	2	3	25.5101	26.61	7	8	12.0224	17.74	3	3	7.73295	12.1	2	2		0							248	29.2072	10.6528
P62424	60S ribosomal protein L7a OS=Homo sapiens OX=9606 GN=RPL7A PE=1 SV=2 - [RL7A_HUMAN]	17.67	1	4	4	8	1.04412e+07	7.18262e+06	3.61624e+07	5.1738e+06	0	0	0	13.9318	16.92	3	4		0			7.68949	10.15	2	2	5.84823	9.4	2	2		0				0							266	29.977	10.6089
P52209	6-phosphogluconate dehydrogenase, decarboxylating OS=Homo sapiens OX=9606 GN=PGD PE=1 SV=3 - [6PGD_HUMAN]	32.51	1	12	12	53	2.12895e+07	2.10317e+07	2.97436e+07	1.4921e+07	1.6692e+07	1.54384e+07	5.01808e+06	31.1335	24.22	7	8	39.2559	21.95	8	11	24.2237	16.98	6	6	50.1801	30.02	10	13	41.2475	22.77	7	9	14.7851	10.56	3	4	9.72868	7.87	2	2	483	53.106	7.2251
O95336	6-phosphogluconolactonase OS=Homo sapiens OX=9606 GN=PGLS PE=1 SV=2 - [6PGL_HUMAN]	32.56	1	5	5	24	1.1108e+07	8.27657e+06	0	7.64979e+06	5.11285e+06	2.17365e+06	1.65352e+06	20.7614	22.87	3	4	24.7869	32.56	5	6		0			24.4923	24.42	3	5	17.5119	29.07	4	4	12.4579	17.83	3	3	11.4548	18.22	2	2	258	27.5296	6.04932
Q8IZP0	Abl interactor 1 OS=Homo sapiens OX=9606 GN=ABI1 PE=1 SV=4 - [ABI1_HUMAN]	6.69	1	2	2	2	2.19327e+06	0	0	2.464e+06	2.94677e+06	0	0	6.09391	6.69	2	2		0				0				0				0											508	55.0467	7.06396
A1L0T0	Acetolactate synthase-like protein OS=Homo sapiens OX=9606 GN=ILVBL PE=1 SV=2 - [ILVBL_HUMAN]	7.28	1	2	2	2	1.67028e+06	601052	2.81828e+06	1.48261e+06	0	840536	0		0				0			7.96927	7.28	2	2		0				0				0				0			632	67.8248	8.14795
P24752	Acetyl-CoA acetyltransferase, mitochondrial OS=Homo sapiens OX=9606 GN=ACAT1 PE=1 SV=1 - [THIL_HUMAN]	41.69	1	10	10	32	1.94938e+06	2.72906e+06	6.5798e+06	3.3663e+06	7.67266e+06	1.35443e+06	0	15.3321	14.29	3	3	26.8327	27.17	7	7	6.88264	7.73	2	2	34.6992	29.51	7	8	27.919	25.53	7	8	13.4613	12.18	4	4		0			427	45.1706	8.85107
Q13510	Acid ceramidase OS=Homo sapiens OX=9606 GN=ASAH1 PE=1 SV=5 - [ASAH1_HUMAN]	21.27	1	6	6	22	7.16319e+06	8.79464e+06	3.04737e+07	4.70966e+06	1.0575e+07	6.25261e+06	2.73644e+06	5.72354	11.39	3	3	15.964	18.48	5	6	13.9138	15.7	4	4	2.85812	8.86	2	2	8.0176	6.84	2	2	16.3637	15.7	4	5		0			395	44.6308	7.62061
P39687	Acidic leucine-rich nuclear phosphoprotein 32 family member A OS=Homo sapiens OX=9606 GN=ANP32A PE=1 SV=1 - [AN32A_HUMAN]	22.49	1	3	5	22	1.89463e+07	5.15043e+06	1.70687e+07	7.19233e+06	3.53079e+06	3.8311e+06	0	28.3422	22.49	5	7	11.487	18.07	3	3	12.4643	12.85	3	3	15.9639	22.49	5	5	7.53297	10.84	2	2	8.28659	9.64	2	2		0			249	28.5683	4.09424
Q92688	Acidic leucine-rich nuclear phosphoprotein 32 family member B OS=Homo sapiens OX=9606 GN=ANP32B PE=1 SV=1 - [AN32B_HUMAN]	15.14	1	1	3	6	4.04269e+06	0	8.61212e+06	1.57954e+06	1.66867e+06	0	0	10.9299	15.14	3	3						0				0				0				0							251	28.7703	4.05615
Q99798	Aconitate hydratase, mitochondrial OS=Homo sapiens OX=9606 GN=ACO2 PE=1 SV=2 - [ACON_HUMAN]	42.95	1	22	22	118	8.13927e+06	1.22364e+07	4.09619e+07	9.52585e+06	3.55148e+07	9.06211e+06	262912	63.1314	28.21	12	15	97.1641	34.49	17	23	65.5189	25.38	13	16	66.5852	26.28	13	16	126.558	38.46	20	32	64.514	28.33	14	16		0			780	85.3719	7.60596
P68032	Actin, alpha cardiac muscle 1 OS=Homo sapiens OX=9606 GN=ACTC1 PE=1 SV=1 - [ACTC_HUMAN]	71.35	2	12	22	686	1.20074e+09	8.03363e+08	2.91987e+09	1.07845e+09	1.11943e+09	1.19122e+09	1.70102e+08	319.084	67.64	17	97	287.32	51.46	14	86	429.238	68.44	20	134	375.007	70.56	19	110	323.305	66.84	18	94	409.187	68.7	20	119	143.861	42.44	12	46	377	41.9919	5.38916
P60709	Actin, cytoplasmic 1 OS=Homo sapiens OX=9606 GN=ACTB PE=1 SV=1 - [ACTB_HUMAN]	80	2	13	23	1743	1.9022e+09	1.54857e+09	5.01319e+09	1.88944e+09	1.63791e+09	1.58289e+09	3.06214e+08	1173.59	69.6	21	284	877.48	65.33	20	224	1860.27	65.33	20	385	995.089	68	21	264	881.251	64.27	20	233	938.843	73.07	21	255	383.524	65.07	19	98	375	41.7097	5.47803
O14639	Actin-binding LIM protein 1 OS=Homo sapiens OX=9606 GN=ABLIM1 PE=1 SV=3 - [ABLM1_HUMAN]	12.21	1	6	6	6	0	3.72185e+06	0	417534	2.40836e+06	0	0		0			8.9994	9.38	4	4		0				0			6.26287	2.83	2	2		0				0			778	87.6311	8.5874
O96019	Actin-like protein 6A OS=Homo sapiens OX=9606 GN=ACTL6A PE=1 SV=1 - [ACL6A_HUMAN]	6.29	1	2	2	2	0	0	1.17096e+06	0	0	0	0		0				0			7.11168	6.29	2	2		0				0				0				0			429	47.4303	5.60498
P61160	Actin-related protein 2 OS=Homo sapiens OX=9606 GN=ACTR2 PE=1 SV=1 - [ARP2_HUMAN]	32.99	1	10	10	44	1.55195e+07	1.19866e+07	5.25213e+07	1.59776e+07	1.13267e+07	1.35228e+07	1.38546e+06	30.0572	30.2	8	9	21.4644	23.86	6	6	26.0722	24.87	8	8	26.3096	29.95	8	8	19.8029	16.5	5	5	25.8357	23.6	6	8		0			394	44.7322	6.7417
Q92747	Actin-related protein 2/3 complex subunit 1A OS=Homo sapiens OX=9606 GN=ARPC1A PE=2 SV=2 - [ARC1A_HUMAN]	36.22	1	7	8	16	9.8068e+06	7.57701e+06	8.44621e+06	0	4.17193e+06	0	0	15.8418	23.78	5	5	16.8941	16.76	4	4	10.3187	14.32	3	3		0			4.20049	14.59	3	3						0			370	41.5427	8.17725
O15143	Actin-related protein 2/3 complex subunit 1B OS=Homo sapiens OX=9606 GN=ARPC1B PE=1 SV=3 - [ARC1B_HUMAN]	36.29	1	7	8	27	1.16055e+07	6.17809e+06	3.26654e+07	5.82398e+06	0	1.22686e+07	0	22.3309	24.46	5	6		0			34.5636	33.6	7	9	15.6274	22.04	5	5		0			19.6719	22.85	5	6		0			372	40.9234	8.35303
O15144	Actin-related protein 2/3 complex subunit 2 OS=Homo sapiens OX=9606 GN=ARPC2 PE=1 SV=1 - [ARPC2_HUMAN]	56.33	1	13	13	32	1.33197e+07	9.17543e+06	4.50253e+07	7.2748e+06	6.15161e+06	8.17822e+06	1.51013e+06	11.7016	15.33	4	5	6.37413	8.67	2	2	44.9524	47	10	14	3.53207	13.67	3	3	10.3347	12.33	3	3	9.94052	13	3	3	6.3905	8.67	2	2	300	34.3115	7.35693
O15145	Actin-related protein 2/3 complex subunit 3 OS=Homo sapiens OX=9606 GN=ARPC3 PE=1 SV=3 - [ARPC3_HUMAN]	30.9	1	6	6	22	1.10505e+07	4.239e+06	1.68446e+07	8.5452e+06	5.363e+06	4.78583e+06	0	12.7904	25.28	4	5	12.2947	25.28	4	4	10.1998	19.66	3	4	6.3164	12.36	2	3	11.6731	13.48	2	3	7.78758	19.66	3	3		0			178	20.5334	8.5874
P59998	Actin-related protein 2/3 complex subunit 4 OS=Homo sapiens OX=9606 GN=ARPC4 PE=1 SV=3 - [ARPC4_HUMAN]	24.4	1	3	3	5	8.88333e+06	7.62589e+06	39482455	1.03942e+07	8.30279e+06	7.15044e+06	1.73873e+06	11.7788	24.4	3	3	6.02959	13.1	2	2		0				0				0				0				0			168	19.6543	8.42627
O15511	Actin-related protein 2/3 complex subunit 5 OS=Homo sapiens OX=9606 GN=ARPC5 PE=1 SV=3 - [ARPC5_HUMAN]	52.32	1	5	5	20	8565055	5.84514e+06	3.04587e+07	7.99686e+06	7.28062e+06	1.15995e+07	0	10.1964	43.71	3	3	14.9924	31.13	3	3	13.7612	35.76	3	3	10.1712	43.71	3	3	9.4012	43.71	3	3	22.0321	52.32	4	5		0			151	16.3103	5.66846
Q9BPX5	Actin-related protein 2/3 complex subunit 5-like protein OS=Homo sapiens OX=9606 GN=ARPC5L PE=1 SV=1 - [ARP5L_HUMAN]	28.76	1	3	3	4	1364273	2.4422e+06	9.11125e+06	0	0	0	0		0			3.42951	20.26	2	2	8.29164	16.34	2	2						0											153	16.9308	6.59521
P61158	Actin-related protein 3 OS=Homo sapiens OX=9606 GN=ACTR3 PE=1 SV=3 - [ARP3_HUMAN]	52.15	1	16	16	100	2.52661e+07	1.5552e+07	7.88406e+07	1.53e+07	1.4277e+07	1.20436e+07	1.77333e+06	59.1817	46.65	13	17	57.9434	44.26	12	16	75.4925	39	12	20	48.8629	40.91	12	16	40.8966	30.38	7	11	59.3987	33.73	9	15	18.3023	18.18	4	5	418	47.341	5.88428
P53999	Activated RNA polymerase II transcriptional coactivator p15 OS=Homo sapiens OX=9606 GN=SUB1 PE=1 SV=3 - [TCP4_HUMAN]	18.9	1	2	2	4	0	0	1.39576e+07	2.97814e+06	6.94754e+06	8.87144e+06	0		0							6.2824	18.9	2	2		0			6.87041	18.9	2	2		0				0			127	14.3864	9.59814
O14561	Acyl carrier protein, mitochondrial OS=Homo sapiens OX=9606 GN=NDUFAB1 PE=1 SV=3 - [ACPM_HUMAN]	15.38	1	2	2	2	0	0	1.45423e+07	0	1.01019e+07	3.14761e+06	0						0				0							4.71552	15.38	2	2		0				0			156	17.406	4.93213
P07108	Acyl-CoA-binding protein OS=Homo sapiens OX=9606 GN=DBI PE=1 SV=2 - [ACBP_HUMAN]	68.97	1	5	5	40	6.04075e+07	4.22204e+07	1.25446e+07	1.53896e+07	1.28767e+08	1.07578e+07	2.83837e+07	21.6858	68.97	5	8	16.804	68.97	5	7	6.16269	29.89	2	2	7.13534	41.38	2	2	34.5973	52.87	3	10	3.35766	52.87	3	3	18.1621	68.97	5	8	87	10.038	6.56592
Q86TX2	Acyl-coenzyme A thioesterase 1 OS=Homo sapiens OX=9606 GN=ACOT1 PE=1 SV=1 - [ACOT1_HUMAN]	7.36	2	2	2	3	0	0	0	0	1.87622e+06	0	0														0			15.817	7.36	2	3						0			421	46.2481	7.34229
Q9NPJ3	Acyl-coenzyme A thioesterase 13 OS=Homo sapiens OX=9606 GN=ACOT13 PE=1 SV=1 - [ACO13_HUMAN]	15.71	1	2	2	4	0	0	0	3.1277e+06	5.04867e+06	0	0		0				0				0			6.74809	15.71	2	2	6.47406	15.71	2	2		0				0			140	14.9509	9.14404
Q9Y305	Acyl-coenzyme A thioesterase 9, mitochondrial OS=Homo sapiens OX=9606 GN=ACOT9 PE=1 SV=2 - [ACOT9_HUMAN]	7.97	1	2	2	2	0	1.59056e+06	2.15903e+07	3.10722e+06	3.76312e+06	945542	0		0				0				0				0			6.38005	7.97	2	2		0				0			439	49.8695	8.60205
Q53H12	Acylglycerol kinase, mitochondrial OS=Homo sapiens OX=9606 GN=AGK PE=1 SV=2 - [AGK_HUMAN]	9	1	2	2	2	2.59041e+06	2.84255e+06	0	2.36607e+06	3.04352e+06	0	0		0				0				0				0			7.13954	9	2	2		0							422	47.1074	8.08936
P14621	Acylphosphatase-2 OS=Homo sapiens OX=9606 GN=ACYP2 PE=1 SV=2 - [ACYP2_HUMAN]	22.22	1	2	2	3	6.06023e+06	1.04313e+07	0	0	7.74426e+06	0	0		0				0				0							10.5823	22.22	2	3						0			99	11.1326	9.49561
O75608	Acyl-protein thioesterase 1 OS=Homo sapiens OX=9606 GN=LYPLA1 PE=1 SV=1 - [LYPA1_HUMAN]	11.74	1	2	2	2	2.13632e+06	1.02466e+06	0	0	0	0	0	5.44702	11.74	2	2		0				0				0								0				0			230	24.6535	6.771
P46108	Adapter molecule crk OS=Homo sapiens OX=9606 GN=CRK PE=1 SV=2 - [CRK_HUMAN]	19.74	1	4	4	11	4.19388e+06	1.61216e+06	2.38498e+06	2.03674e+06	1.05983e+06	252698	0	19.0716	19.74	4	5	13.1706	9.21	2	3		0			11.322	14.14	3	3		0				0				0			304	33.81	5.5542
P07741	Adenine phosphoribosyltransferase OS=Homo sapiens OX=9606 GN=APRT PE=1 SV=2 - [APT_HUMAN]	35.56	1	5	5	23	1.07609e+07	6.58379e+06	1.23015e+07	8.34779e+06	3.76215e+06	2.01188e+06	331766	14.144	27.22	4	6	10.9671	20	3	4	8.9952	14.44	2	3	22.0229	35.56	5	7		0			7.35383	14.44	2	3		0			180	19.5954	6.02393
Q96HN2	Adenosylhomocysteinase 3 OS=Homo sapiens OX=9606 GN=AHCYL2 PE=1 SV=1 - [SAHH3_HUMAN]	19.64	1	4	8	19	7.55015e+06	5.57891e+06	4.36187e+06	0	1.03824e+07	2.31143e+06	2.62878e+06	14.9137	11.95	4	4	13.6208	9.33	4	4	5.91365	3.76	2	2		0				0			8.05831	5.73	2	2		0			611	66.6785	7.35693
P23526	Adenosylhomocysteinase OS=Homo sapiens OX=9606 GN=AHCY PE=1 SV=4 - [SAHH_HUMAN]	33.56	1	11	11	38	1.47493e+07	8.64841e+06	1.27519e+07	6.34709e+06	6948441	5.72295e+06	0	32.638	28.24	9	10	25.2109	24.07	7	8	14.842	13.89	4	4	19.5144	13.19	5	5	15.6087	16.67	5	5	21.0292	17.82	6	6					432	47.6852	6.34131
P54819	Adenylate kinase 2, mitochondrial OS=Homo sapiens OX=9606 GN=AK2 PE=1 SV=2 - [KAD2_HUMAN]	37.66	1	6	6	15	1.39562e+07	6.29604e+06	1.92917e+07	8.74467e+06	0	2.69974e+06	0	11.0086	18.41	3	3	15.6021	33.05	5	5	11.4178	21.34	3	3	6.52225	10.88	2	2		0			5.62444	11.3	2	2		0			239	26.4608	7.81104
P00568	Adenylate kinase isoenzyme 1 OS=Homo sapiens OX=9606 GN=AK1 PE=1 SV=3 - [KAD1_HUMAN]	55.15	1	9	9	68	8.27556e+06	1.22663e+07	4.191e+06	1.0371e+07	1.5055e+07	0	7.99366e+06	28.9176	30.41	5	10	42.7958	39.18	7	15	7.38089	18.56	3	3	32.1481	36.6	7	11	32.7808	36.6	7	12					53.2515	48.97	8	17	194	21.6213	8.63135
Q01518	Adenylyl cyclase-associated protein 1 OS=Homo sapiens OX=9606 GN=CAP1 PE=1 SV=5 - [CAP1_HUMAN]	49.47	1	18	18	108	3.16966e+07	1.47887e+07	7.00489e+07	1.89784e+07	1.40741e+07	2.20512e+07	1.80608e+06	74.7956	34.11	11	22	68.6194	37.68	11	21	96.5725	36.63	13	24	50.8101	32	10	15	35.3388	28.63	9	10	53.9356	32	11	16		0			475	51.8687	8.06006
P40123	Adenylyl cyclase-associated protein 2 OS=Homo sapiens OX=9606 GN=CAP2 PE=1 SV=1 - [CAP2_HUMAN]	25.58	1	7	7	8	0	0	0	1.12289e+06	9.07616e+06	1.25747e+06	0		0				0				0				0			32.6827	25.58	7	8		0							477	52.7908	6.3667
Q8IUX7	Adipocyte enhancer-binding protein 1 OS=Homo sapiens OX=9606 GN=AEBP1 PE=1 SV=1 - [AEBP1_HUMAN]	22.19	1	19	19	30	3.02936e+06	979779	8.93485e+06	0	0	4.23197e+07	0	11.468	4.06	3	3		0			11.5783	3.8	3	3		0				0			101.496	22.19	19	24		0			1158	130.847	5.10986
Q9HDC9	Adipocyte plasma membrane-associated protein OS=Homo sapiens OX=9606 GN=APMAP PE=1 SV=2 - [APMAP_HUMAN]	39.66	1	11	11	43	8.73532e+06	3.4017e+06	2.95608e+07	6.3726e+06	2.56618e+06	8.13757e+06	0	24.1675	27.88	7	8	15.8943	19.47	4	4	36.5184	37.5	10	12	18.0257	20.91	6	6	7.98796	9.13	2	2	29.3151	32.21	9	11		0			416	46.4509	6.16357
P12235	ADP/ATP translocase 1 OS=Homo sapiens OX=9606 GN=SLC25A4 PE=1 SV=4 - [ADT1_HUMAN]	23.49	1	2	7	24	1.34713e+07	7.16556e+06	4.76689e+07	1.88358e+07	4.17738e+07	7.03207e+06	2.98947e+06		0				0				0				0			36.3157	23.49	7	12		0				0			298	33.0432	9.75928
P05141	ADP/ATP translocase 2 OS=Homo sapiens OX=9606 GN=SLC25A5 PE=1 SV=7 - [ADT2_HUMAN]	26.51	1	4	8	33	2.94018e+07	1.42223e+07	8.73536e+07	2.04106e+07	5.326e+07	1.51051e+07	2.12776e+06		0				0			30.6176	23.15	6	10	14.135	18.46	5	6	22.7974	19.8	5	8		0			9.20083	11.41	3	3	298	32.8312	9.68604
P12236	ADP/ATP translocase 3 OS=Homo sapiens OX=9606 GN=SLC25A6 PE=1 SV=4 - [ADT3_HUMAN]	26.85	1	2	9	38	1.50691e+07	1.12614e+07	8.6655e+07	2.04106e+07	5.326e+07	1.17237e+07	2.98947e+06	16.0565	17.11	5	5	8.94703	15.77	4	4		0				0			40.5671	23.83	8	13	12.7409	11.41	3	4		0			298	32.8452	9.74463
P28907	ADP-ribosyl cyclase/cyclic ADP-ribose hydrolase 1 OS=Homo sapiens OX=9606 GN=CD38 PE=1 SV=2 - [CD38_HUMAN]	7.33	1	2	2	2	0	0	0	0	3.472e+06	0	0		0				0				0				0			6.80709	7.33	2	2		0				0			300	34.3061	7.66455
Q10588	ADP-ribosyl cyclase/cyclic ADP-ribose hydrolase 2 OS=Homo sapiens OX=9606 GN=BST1 PE=1 SV=2 - [BST1_HUMAN]	22.64	1	5	5	6	0	0	0	0	0	4.16892e+06	0		0				0				0				0				0			19.5985	22.64	5	6		0			318	35.7011	7.79639
P61204	ADP-ribosylation factor 3 OS=Homo sapiens OX=9606 GN=ARF3 PE=1 SV=2 - [ARF3_HUMAN]	58.56	2	4	9	71	2.3642e+07	1.75217e+07	5.54261e+07	2.27021e+07	5.14191e+07	1.68631e+07	4.35138e+06	32.8055	58.56	8	9	45.8174	47.51	7	12	36.7015	46.96	6	10	41.0473	52.49	8	10	56.1978	54.14	8	14	43.3988	54.14	7	12	15.0645	36.46	4	4	181	20.5877	7.43018
P18085	ADP-ribosylation factor 4 OS=Homo sapiens OX=9606 GN=ARF4 PE=1 SV=3 - [ARF4_HUMAN]	60	1	5	9	42	1.90995e+07	8.39532e+06	5.61645e+07	1.43796e+07	2.37606e+07	1.50516e+07	4.89233e+06		0			18.4854	31.11	4	5	23.1004	31.11	4	7	29.2049	46.11	6	8	34.5278	40	6	9	30.5999	47.78	6	9		0			180	20.4977	7.13721
P84085	ADP-ribosylation factor 5 OS=Homo sapiens OX=9606 GN=ARF5 PE=1 SV=2 - [ARF5_HUMAN]	64.44	1	5	10	45	1.75522e+07	8.40232e+06	4.33498e+07	1.38891e+07	3.52209e+07	1.3045e+07	3.05958e+06	17.2466	52.22	6	6		0			24.0602	30.56	4	7	31.2361	38.33	6	8	41.5392	48.33	7	11		0				0			180	20.5166	6.78564
P62330	ADP-ribosylation factor 6 OS=Homo sapiens OX=9606 GN=ARF6 PE=1 SV=2 - [ARF6_HUMAN]	39.43	1	4	4	8	5.91563e+06	0	1.64882e+07	0	2.77035e+06	3.62284e+06	0	6.19135	12.57	2	2					16.6046	33.14	3	4						0			5.15234	17.71	2	2		0			175	20.0694	8.95361
P36405	ADP-ribosylation factor-like protein 3 OS=Homo sapiens OX=9606 GN=ARL3 PE=1 SV=2 - [ARL3_HUMAN]	34.07	1	4	4	5	5.89481e+06	2.1427e+06	2.20661e+06	1.68159e+06	3.81301e+06	0	0	9.29354	28.57	3	3		0				0				0			6.46014	17.58	2	2									182	20.4428	7.23975
Q9NVJ2	ADP-ribosylation factor-like protein 8B OS=Homo sapiens OX=9606 GN=ARL8B PE=1 SV=1 - [ARL8B_HUMAN]	18.82	2	3	3	6	0	3.12261e+06	3.06831e+07	4.68188e+06	1.26163e+07	0	0		0				0			6.53942	10.22	2	2	5.07139	13.98	2	2	5.9125	10.22	2	2		0							186	21.5251	8.42627
Q9UKK9	ADP-sugar pyrophosphatase OS=Homo sapiens OX=9606 GN=NUDT5 PE=1 SV=1 - [NUDT5_HUMAN]	12.79	1	2	2	2	3.28826e+06	0	0	0	2.37569e+06	1.13692e+06	697392	8.78646	12.79	2	2		0												0				0				0			219	24.3122	4.94482
P43652	Afamin OS=Homo sapiens OX=9606 GN=AFM PE=1 SV=1 - [AFAM_HUMAN]	23.21	1	10	10	26	2.73039e+06	0	0	612436	0	2.8307e+06	9.65152e+06	7.38431	4.84	2	2		0				0			7.31439	4.34	2	2		0			22.413	14.36	6	6	49.689	23.21	10	16	599	69.024	5.89697
O43488	Aflatoxin B1 aldehyde reductase member 2 OS=Homo sapiens OX=9606 GN=AKR7A2 PE=1 SV=3 - [ARK72_HUMAN]	35.65	1	8	8	21	7.45333e+06	4.24987e+06	1.04932e+07	3.79064e+06	5.93928e+06	3.21461e+06	0	22.9855	24.51	6	6	9.58362	9.47	2	2	10.6589	9.47	2	2	17.1548	12.53	3	4	18.8118	23.96	5	5	8.39135	9.47	2	2		0			359	39.5637	7.1665
O00468	Agrin OS=Homo sapiens OX=9606 GN=AGRN PE=1 SV=5 - [AGRIN_HUMAN]	13.59	1	17	17	27	1.83646e+06	0	1.30685e+07	3.53297e+06	4.73651e+06	2.11751e+06	0		0				0			53.8225	11.03	12	13	29.7292	4.98	6	6	25.5474	6.39	8	8		0				0			2067	217.092	6.39209
Q02952	A-kinase anchor protein 12 OS=Homo sapiens OX=9606 GN=AKAP12 PE=1 SV=4 - [AKA12_HUMAN]	26.26	1	25	25	46	2.60171e+06	4.3352e+06	2.63021e+06	0	6.62851e+06	9.79312e+06	0	11.977	4.32	4	4	26.5559	8.36	7	7	9.60819	2.86	3	3		0			40.2419	12.57	11	11	85.7507	19.64	18	21		0			1782	191.367	4.41162
P49588	Alanine--tRNA ligase, cytoplasmic OS=Homo sapiens OX=9606 GN=AARS PE=1 SV=2 - [SYAC_HUMAN]	19.11	1	12	12	22	4.30933e+06	2.95792e+06	0	0	4.93433e+06	0	0	26.5726	12.09	7	7	25.6822	9.92	6	6		0			5.33296	2.69	2	2	26.5086	11.57	7	7		0				0			968	106.743	5.52881
P14550	Alcohol dehydrogenase [NADP(+)] OS=Homo sapiens OX=9606 GN=AKR1A1 PE=1 SV=3 - [AK1A1_HUMAN]	56.92	1	11	12	48	1.77952e+07	1.06926e+07	1.52162e+07	1.05913e+07	6.28531e+06	4.03612e+06	0	45.3759	37.85	8	11	34.4602	33.85	7	8	26.4382	31.69	7	9	33.3217	42.77	7	8	23.851	22.46	6	6	22.4744	23.38	5	6		0			325	36.5499	6.78564
P00325	Alcohol dehydrogenase 1B OS=Homo sapiens OX=9606 GN=ADH1B PE=1 SV=2 - [ADH1B_HUMAN]	9.6	2	3	3	3	0	0	0	0	0	4.9878e+06	0										0				0				0			15.495	9.6	3	3		0			375	39.8286	8.29443
P11766	Alcohol dehydrogenase class-3 OS=Homo sapiens OX=9606 GN=ADH5 PE=1 SV=4 - [ADHX_HUMAN]	24.87	1	8	8	34	2.32384e+07	1.07385e+07	2.76781e+07	9.42562e+06	1.50303e+07	4.80313e+06	4.29007e+06	26.9923	22.99	6	6	24.3885	21.93	5	6	15.1429	15.24	4	4	21.6231	21.12	5	5	21.8108	20.59	5	5	16.459	17.65	4	5	12.3044	14.71	3	3	374	39.6984	7.48877
P05091	Aldehyde dehydrogenase, mitochondrial OS=Homo sapiens OX=9606 GN=ALDH2 PE=1 SV=2 - [ALDH2_HUMAN]	55.9	1	24	24	110	1.21311e+07	6.31273e+06	7.43153e+07	1.36719e+07	1.51895e+07	2.29057e+07	0	52.5023	30.56	10	13	28.2612	25.34	8	9	89.1868	51.06	19	25	72.4437	39.46	14	19	75.1391	41.2	15	20	82.9055	37.14	15	24		0			517	56.3456	7.04932
P52895	Aldo-keto reductase family 1 member C2 OS=Homo sapiens OX=9606 GN=AKR1C2 PE=1 SV=3 - [AK1C2_HUMAN]	13.93	2	2	2	2	3.48736e+06	0	0	0	2.51742e+06	0	0		0				0				0							9.67761	13.93	2	2						0			323	36.712	7.48877
P42330	Aldo-keto reductase family 1 member C3 OS=Homo sapiens OX=9606 GN=AKR1C3 PE=1 SV=4 - [AK1C3_HUMAN]	13	1	2	2	2	2.09568e+06	0	0	0	4.25505e+06	1.21762e+06	0	8.14026	13	2	2		0				0				0				0				0				0			323	36.8298	7.94287
Q96C23	Aldose 1-epimerase OS=Homo sapiens OX=9606 GN=GALM PE=1 SV=1 - [GALM_HUMAN]	8.48	1	2	2	2	0	0	0	897257	0	1.97922e+06	0		0				0				0				0				0			6.34833	8.48	2	2		0			342	37.7421	6.65381
P15121	Aldose reductase OS=Homo sapiens OX=9606 GN=AKR1B1 PE=1 SV=3 - [ALDR_HUMAN]	40.51	1	6	7	26	1.88266e+07	1.24627e+07	9.13794e+06	5.583e+06	8.9709e+06	9.37857e+06	0	18.9669	28.8	5	5	7.39997	24.37	4	5	19.0463	18.99	4	5	5.9387	24.68	4	4	10.6885	18.35	3	4	4.95799	15.19	2	3					316	35.8305	6.97607
P05186	Alkaline phosphatase, tissue-nonspecific isozyme OS=Homo sapiens OX=9606 GN=ALPL PE=1 SV=4 - [PPBT_HUMAN]	22.14	1	7	7	16	0	0	3.19271e+07	1.96347e+06	0	3.50203e+06	0		0				0			42.6788	22.14	7	11	7.22524	7.06	2	2		0			11.9619	11.64	3	3		0			524	57.2686	6.66846
P02763	Alpha-1-acid glycoprotein 1 OS=Homo sapiens OX=9606 GN=ORM1 PE=1 SV=1 - [A1AG1_HUMAN]	37.31	1	6	7	64	7.79844e+07	1.82566e+07	1.61743e+07	1.69984e+07	9.48878e+06	2.57509e+07	6.90999e+07	37.3758	31.34	6	14	13.4673	23.88	5	6	9.41339	11.44	2	3	21.0778	23.88	5	8	15.6194	23.38	4	5	29.0615	23.88	5	11	35.0061	37.31	6	17	201	23.4968	5.021
P19652	Alpha-1-acid glycoprotein 2 OS=Homo sapiens OX=9606 GN=ORM2 PE=1 SV=2 - [A1AG2_HUMAN]	22.89	1	4	5	47	3.54151e+07	9.47855e+06	1.61055e+07	7.54298e+06	5.43545e+06	1.14681e+07	3.2723e+07	34.5292	22.89	4	11	16.3478	17.91	3	4		0			16.7985	17.91	3	5	16.1822	17.91	3	4	27.5612	22.39	4	8	42.8638	22.89	5	13	201	23.5876	5.10986
P01011	Alpha-1-antichymotrypsin OS=Homo sapiens OX=9606 GN=SERPINA3 PE=1 SV=2 - [AACT_HUMAN]	25.3	1	11	11	47	1.40344e+07	4.03535e+06	6.55681e+06	1.23666e+07	6.75207e+06	0	2.62017e+07	37.5273	21.75	8	10	26.8232	15.84	6	7		0			35.0579	22.22	8	9	14.5016	9.46	3	3		0			69.4982	25.06	10	18	423	47.6205	5.51611
P01009	Alpha-1-antitrypsin OS=Homo sapiens OX=9606 GN=SERPINA1 PE=1 SV=3 - [A1AT_HUMAN]	55.26	1	26	26	277	1.35176e+08	4.66002e+07	3.24418e+07	80666985	5.29857e+07	2.91983e+07	2.79184e+08	193.248	47.85	19	51	108.026	40.67	15	30	39.797	29.67	8	10	157.048	48.56	16	40	88.6372	46.89	14	23	77.718	35.65	13	20	393.69	55.02	24	103	418	46.707	5.59229
P04217	Alpha-1B-glycoprotein OS=Homo sapiens OX=9606 GN=A1BG PE=1 SV=4 - [A1BG_HUMAN]	33.74	1	11	11	64	1.25007e+07	5.42396e+06	5.70032e+06	5.42249e+06	1.65863e+06	7.55347e+06	3.66371e+07	48.8613	25.66	8	12	27.0988	18.79	6	7		0			25.3437	13.74	4	6	8.26292	10.1	3	3	32.9752	23.23	7	9	93.4867	30.51	10	27	495	54.2195	5.85889
Q13424	Alpha-1-syntrophin OS=Homo sapiens OX=9606 GN=SNTA1 PE=1 SV=1 - [SNTA1_HUMAN]	13.07	1	3	3	3	0	0	0	0	3.32353e+06	0	0		0				0				0				0			13.5066	13.07	3	3		0				0			505	53.8619	6.80029
P08697	Alpha-2-antiplasmin OS=Homo sapiens OX=9606 GN=SERPINF2 PE=1 SV=3 - [A2AP_HUMAN]	24.03	1	7	7	8	4.21882e+06	0	0	3.37789e+06	0	0	3.16386e+06		0				0				0			3.35283	9.98	3	3		0				0			14.2032	16.7	5	5	491	54.5311	6.29053
P02765	Alpha-2-HS-glycoprotein OS=Homo sapiens OX=9606 GN=AHSG PE=1 SV=1 - [FETUA_HUMAN]	45.23	1	11	11	139	6.25706e+07	4.32978e+07	2.43235e+08	2.70114e+08	1.10559e+08	3.73349e+07	6.71624e+07	60.0014	25.07	6	14	48.9835	25.07	6	12	111.918	44.96	10	33	121.606	28.61	8	29	58.9645	24.25	5	14	40.8096	22.34	5	10	111.056	22.89	6	27	367	39.2997	5.71924
P01023	Alpha-2-macroglobulin OS=Homo sapiens OX=9606 GN=A2M PE=1 SV=3 - [A2MG_HUMAN]	51.09	1	57	57	560	9.35421e+07	5.4662e+07	3.97467e+07	54006441	3.52366e+07	5.92798e+07	8.44445e+07	322.954	46.81	48	90	292.14	45.79	44	80	90.8428	19.27	22	25	262.899	46.07	49	77	211.917	42.4	44	63	321.319	47.15	47	90	490.859	49.46	53	135	1474	163.188	6.45557
P30533	Alpha-2-macroglobulin receptor-associated protein OS=Homo sapiens OX=9606 GN=LRPAP1 PE=1 SV=1 - [AMRP_HUMAN]	14.29	1	3	3	9	0	2.48099e+06	1.27832e+07	1.84308e+06	0	3.73767e+06	0		0			6.99155	10.64	2	2	11.2565	14.29	3	3	7.17122	10.64	2	2		0			7.93075	10.64	2	2		0			357	41.4409	8.77783
P12814	Alpha-actinin-1 OS=Homo sapiens OX=9606 GN=ACTN1 PE=1 SV=2 - [ACTN1_HUMAN]	67.94	1	37	55	380	5.81103e+07	4.00292e+07	1.94307e+08	4.41077e+07	2.22045e+07	3.27659e+07	1.98678e+06	254.483	56.61	42	73	223.711	61.77	46	66	289.237	58.86	45	82	202.557	51.79	36	57	144.514	48.99	33	38	214.347	53.14	36	61	10.3085	4.48	3	3	892	102.993	5.41455
O43707	Alpha-actinin-4 OS=Homo sapiens OX=9606 GN=ACTN4 PE=1 SV=2 - [ACTN4_HUMAN]	65.42	1	34	52	400	6.42456e+07	3.62455e+07	2.12327e+08	4.44463e+07	2.11842e+07	3.19162e+07	1.98678e+06	272.92	59.5	45	81	187.292	57.52	41	58	294.657	63.45	48	93	253.324	60.15	42	73	124.584	45.01	28	34	197.396	56.09	37	58	10.3085	4.39	3	3	911	104.788	5.43994
P35611	Alpha-adducin OS=Homo sapiens OX=9606 GN=ADD1 PE=1 SV=2 - [ADDA_HUMAN]	32.7	1	16	16	55	6.14203e+06	6.09905e+06	4.57713e+06	4.39108e+06	1.60212e+07	4.35587e+06	1.71766e+06	16.864	11.67	5	5	32.2158	18.86	9	10	12.9679	6.24	3	4	21.8059	11.94	6	6	62.5507	20.9	12	17	25.9947	12.75	6	8	18.2998	10.31	5	5	737	80.9047	5.8335
P49419	Alpha-aminoadipic semialdehyde dehydrogenase OS=Homo sapiens OX=9606 GN=ALDH7A1 PE=1 SV=5 - [AL7A1_HUMAN]	48.61	1	18	18	89	1.366e+07	1.17795e+07	3.56802e+07	1.17905e+07	1.65665e+07	1.09052e+07	2.98768e+06	47.1469	38.03	12	12	44.5162	38.78	12	13	54.5332	31.91	11	14	53.621	43.78	13	14	67.2486	37.48	14	17	53.452	31.91	11	13	21.2066	21.71	6	6	539	58.4501	7.98682
P61163	Alpha-centractin OS=Homo sapiens OX=9606 GN=ACTR1A PE=1 SV=1 - [ACTZ_HUMAN]	38.03	1	8	8	28	8.00039e+06	6.6487e+06	28555742	8.4182e+06	1.3612e+07	5.11865e+06	0	11.7807	17.82	4	4	15.0639	17.82	4	4	29.1258	32.98	7	8	16.184	22.87	5	5	10.6054	8.78	2	3	10.6494	21.54	4	4		0			376	42.5869	6.63916
P02511	Alpha-crystallin B chain OS=Homo sapiens OX=9606 GN=CRYAB PE=1 SV=2 - [CRYAB_HUMAN]	49.14	1	9	9	135	9.59094e+07	5.17119e+07	1.02599e+08	1.01402e+08	6.39855e+07	0	8.20037e+06	106.449	43.43	7	31	85.1599	43.43	8	31	68.298	43.43	8	21	90.4057	49.14	9	31	60.3896	41.14	6	19		0			6.75131	13.71	2	2	175	20.1464	7.32764
P06733	Alpha-enolase OS=Homo sapiens OX=9606 GN=ENO1 PE=1 SV=2 - [ENOA_HUMAN]	67.74	1	25	27	336	1.94903e+08	1.86416e+08	2.4137e+08	8.09351e+07	1.71975e+08	6.38692e+07	3.27269e+07	287.404	64.29	23	64	321.745	67.74	27	73	204.553	58.76	20	47	155.928	60.37	17	37	228.609	64.06	20	52	154.837	59.22	21	37	113.495	50	14	26	434	47.1393	7.38623
Q16352	Alpha-internexin OS=Homo sapiens OX=9606 GN=INA PE=1 SV=2 - [AINX_HUMAN]	23.65	1	10	12	37	8.05514e+08	4.85535e+08	1.02261e+09	8.39574e+08	1.64978e+08	5.18418e+08	5.01073e+07		0				0				0				0			54.7324	23.05	11	15		0				0			499	55.3574	5.40186
Q9NVD7	Alpha-parvin OS=Homo sapiens OX=9606 GN=PARVA PE=1 SV=1 - [PARVA_HUMAN]	16.67	1	4	4	4	1.57594e+06	0	4.66154e+06	0	0	3.0099e+06	0		0								0				0							18.4062	16.67	4	4		0			372	42.2174	5.94775
P54920	Alpha-soluble NSF attachment protein OS=Homo sapiens OX=9606 GN=NAPA PE=1 SV=3 - [SNAA_HUMAN]	65.42	1	11	13	39	4.49548e+06	3.37462e+06	1.96274e+07	2.72627e+06	8.84017e+06	2.64059e+06	0	30.1942	34.24	6	7	25.0699	41.02	7	7	46.4006	49.83	10	12	15.6438	20.68	4	4	27.7158	24.41	5	6	11.4012	16.95	3	3		0			295	33.2113	5.36377
P37840	Alpha-synuclein OS=Homo sapiens OX=9606 GN=SNCA PE=1 SV=1 - [SYUA_HUMAN]	64.29	1	6	6	10	635913	2.81888e+06	0	2.32685e+06	2.61683e+07	0	1.44641e+06		0			8.22863	25	2	2		0				0			28.5205	64.29	6	8						0			140	14.4512	4.70361
Q9NP70	Ameloblastin OS=Homo sapiens OX=9606 GN=AMBN PE=1 SV=1 - [AMBN_HUMAN]	18.34	1	5	5	80	7386385	6.83717e+06	6.87296e+07	1.82429e+08	0	8.24396e+06	0	6.57906	7.16	2	2	6.07438	7.16	2	2	26.54	14.77	4	9	54.4789	18.34	5	67		0				0				0			447	48.2516	4.91943
P21397	Amine oxidase [flavin-containing] A OS=Homo sapiens OX=9606 GN=MAOA PE=1 SV=1 - [AOFA_HUMAN]	12.71	1	4	6	18	2.7443e+06	8.21731e+06	0	8.61091e+06	1.30317e+07	0	3.67202e+06	12.0727	8.73	3	3		0				0				0			21.0172	9.87	4	6		0				0			527	59.6435	7.85498
P27338	Amine oxidase [flavin-containing] B OS=Homo sapiens OX=9606 GN=MAOB PE=1 SV=3 - [AOFB_HUMAN]	50.38	1	17	19	93	1.90236e+07	3.85593e+07	0	2.51946e+07	4.89451e+07	0	1.41078e+07	36.8238	23.65	9	10	77.1915	34.62	14	25		0			56.7377	25.38	10	15	86.9511	35.96	12	24		0			63.9907	38.46	14	19	520	58.7252	7.50342
Q12904	Aminoacyl tRNA synthase complex-interacting multifunctional protein 1 OS=Homo sapiens OX=9606 GN=AIMP1 PE=1 SV=2 - [AIMP1_HUMAN]	11.86	1	2	2	2	4.88806e+06	3.3569e+06	1.458e+07	2.74854e+06	3.45613e+06	4.03341e+06	0		0				0				0				0			5.74354	11.86	2	2		0				0			312	34.3311	8.42627
Q9H4A4	Aminopeptidase B OS=Homo sapiens OX=9606 GN=RNPEP PE=1 SV=2 - [AMPB_HUMAN]	15.08	1	6	6	15	6.87655e+06	3.17143e+06	1.01031e+07	3.96221e+06	0	2.73722e+06	0	13.5978	8.77	3	3	12.1823	8.92	3	3	16.8601	9.69	4	4	20.341	13.08	5	5		0				0				0			650	72.5495	5.74463
P15144	Aminopeptidase N OS=Homo sapiens OX=9606 GN=ANPEP PE=1 SV=4 - [AMPN_HUMAN]	14.06	1	12	12	18	0	0	1.61277e+07	0	0	6.94591e+06	0		0				0			23.5157	9.72	7	7		0				0			36.6048	12.51	11	11		0			967	109.471	5.47803
P49418	Amphiphysin OS=Homo sapiens OX=9606 GN=AMPH PE=1 SV=1 - [AMPH_HUMAN]	24.17	1	8	8	8	0	0	0	0	7.18037e+06	0	0		0				0				0				0			24.3205	24.17	8	8		0				0			695	76.21	4.64014
P05067	Amyloid-beta A4 protein OS=Homo sapiens OX=9606 GN=APP PE=1 SV=3 - [A4_HUMAN]	15.97	2	9	9	14	0	0	2.11537e+07	1.00368e+07	0	0	0		0				0			20.8649	10.13	6	6	25.9219	11.3	6	8		0				0				0			770	86.8881	4.81787
P01019	Angiotensinogen OS=Homo sapiens OX=9606 GN=AGT PE=1 SV=1 - [ANGT_HUMAN]	24.95	1	9	9	28	5.27377e+06	1.92045e+06	0	2.22982e+06	950209	2.65163e+06	1.14681e+07	15.6855	9.28	4	4	9.68083	6.19	2	2		0			11.923	11.13	3	3		0			10.1229	6.19	2	2	58.1236	24.95	9	17	485	53.1205	6.31592
P16157	Ankyrin-1 OS=Homo sapiens OX=9606 GN=ANK1 PE=1 SV=3 - [ANK1_HUMAN]	12.6	1	12	14	27	0	2.74551e+06	0	2.37605e+06	8.44568e+06	5.38977e+06	0		0			18.4633	4.15	4	4		0			11.8712	3.14	3	3	35.7232	8.83	10	10	41.7998	9.2	10	10		0			1881	206.137	6.01123
Q01484	Ankyrin-2 OS=Homo sapiens OX=9606 GN=ANK2 PE=1 SV=4 - [ANK2_HUMAN]	13.17	1	29	31	54	5.64632e+06	7.10801e+06	0	4.57049e+06	1.63831e+07	0	3.05533e+06	10.0845	1.82	4	4	26.4545	3.51	8	8		0			13.4132	1.79	5	5	105.807	12.23	29	32		0			11.4315	1.92	5	5	3957	433.448	5.13525
P04083	Annexin A1 OS=Homo sapiens OX=9606 GN=ANXA1 PE=1 SV=2 - [ANXA1_HUMAN]	64.16	1	21	21	293	3.96849e+08	2.66131e+08	9.82056e+08	2.92197e+08	7.8094e+07	9.23678e+07	2.04774e+07	216.558	64.16	20	61	193.147	61.56	19	53	234.243	63.87	19	58	204.094	59.83	20	54	75.7075	50.87	14	20	112.509	56.65	15	30	61.285	51.73	12	17	346	38.69	7.02002
P50995	Annexin A11 OS=Homo sapiens OX=9606 GN=ANXA11 PE=1 SV=1 - [ANX11_HUMAN]	22.18	1	9	9	26	6.72025e+06	3.39929e+06	1.59639e+07	4.51781e+06	3.57721e+06	5.91401e+06	0	11.3625	10.1	4	4	6.98665	4.75	2	2	20.534	17.23	6	6	18.8042	12.67	5	5	7.43192	4.95	2	2	24.2237	13.66	5	7		0			505	54.3551	7.6499
P07355	Annexin A2 OS=Homo sapiens OX=9606 GN=ANXA2 PE=1 SV=2 - [ANXA2_HUMAN]	66.37	1	26	26	418	3.63955e+08	2.20958e+08	1.89978e+09	2.34003e+08	1.12185e+08	4.87704e+08	1.98057e+07	284.118	55.16	20	68	249.822	58.11	21	59	350.986	66.37	24	85	240.733	52.8	19	58	182.631	50.44	19	45	332.385	54.28	20	79	92.2242	46.02	14	24	339	38.5798	7.75244
P12429	Annexin A3 OS=Homo sapiens OX=9606 GN=ANXA3 PE=1 SV=3 - [ANXA3_HUMAN]	45.82	1	12	12	25	1.20913e+07	2.49035e+06	43811165	6.84463e+06	0	0	0	28.3568	27.55	7	7		0			47.4322	39.63	10	12	20.7782	22.91	6	6		0				0				0			323	36.3527	5.92236
P09525	Annexin A4 OS=Homo sapiens OX=9606 GN=ANXA4 PE=1 SV=4 - [ANXA4_HUMAN]	44.51	1	14	14	78	1.37902e+07	8.49068e+06	43484176	1.25724e+07	5.17012e+06	1.52863e+07	0	57.5772	40.75	11	15	45.1295	37.93	9	11	63.8885	41.38	11	17	49.8476	40.44	10	12	23.5087	25.39	6	6	71.8746	40.75	12	17		0			319	35.8601	6.12549
P08758	Annexin A5 OS=Homo sapiens OX=9606 GN=ANXA5 PE=1 SV=2 - [ANXA5_HUMAN]	70	1	20	20	294	1.09937e+08	1.24148e+08	2.38065e+08	1.06181e+08	7.17494e+07	7.36421e+07	1.53244e+07	171.004	65.31	19	50	182.291	65.31	19	55	155.275	59.69	16	44	188.352	67.5	18	54	103.199	61.56	15	30	153.829	59.06	15	44	46.5902	32.81	9	17	320	35.9144	5.04639
P08133	Annexin A6 OS=Homo sapiens OX=9606 GN=ANXA6 PE=1 SV=3 - [ANXA6_HUMAN]	58.25	1	32	32	185	2.2734e+07	3.44728e+07	5.73708e+07	2.50212e+07	2.95904e+07	4.17987e+07	2.77485e+06	68.5549	37.74	17	22	108.82	49.33	23	34	86.8576	43.24	18	24	85.3471	38.78	18	27	118.742	46.06	23	34	134.747	43.24	22	39	15.733	10.85	5	5	673	75.8256	5.60498
P20073	Annexin A7 OS=Homo sapiens OX=9606 GN=ANXA7 PE=1 SV=3 - [ANXA7_HUMAN]	24.39	1	9	9	32	9.16506e+06	8.34019e+06	2.33392e+07	4.79596e+06	7.87828e+06	7.47416e+06	0	22.4299	18.85	6	6	18.2807	17.42	5	5	10.9927	13.11	4	4	16.9923	10.66	4	4	22.5741	18.44	6	7	19.0703	18.85	6	6		0			488	52.7058	5.68115
Q5VT79	Annexin A8-like protein 1 OS=Homo sapiens OX=9606 GN=ANXA8L1 PE=2 SV=2 - [AXA81_HUMAN]	17.43	1	3	3	5	0	0	2.10335e+07	0	0	0	0		0				0			20.933	17.43	3	5		0				0				0				0			327	36.8557	5.78271
Q4KMQ2	Anoctamin-6 OS=Homo sapiens OX=9606 GN=ANO6 PE=1 SV=2 - [ANO6_HUMAN]	6.37	1	3	3	4	0	4.57345e+06	2.05962e+06	3.3738e+06	0	1.51597e+06	0		0			7.42272	4.4	2	2		0			6.79188	4.4	2	2		0				0				0			910	106.096	7.76709
P03973	Antileukoproteinase OS=Homo sapiens OX=9606 GN=SLPI PE=1 SV=2 - [SLPI_HUMAN]	20.45	1	3	3	7	0	0	1.00792e+07	0	0	0	5.11564e+06						0			12.5408	20.45	3	4		0				0				0			9.58807	20.45	2	3	132	14.3159	8.74854
P01008	Antithrombin-III OS=Homo sapiens OX=9606 GN=SERPINC1 PE=1 SV=1 - [ANT3_HUMAN]	48.49	1	17	17	69	1.79883e+07	5.08418e+06	7.35944e+06	1.49926e+07	6.76647e+06	7.47118e+06	3.39875e+07	38.9936	25	9	11	12.2842	9.7	3	3	7.15483	5.82	2	2	37.4625	26.51	10	11	14.137	12.07	4	4	18.2163	15.52	5	5	113.405	46.12	15	33	464	52.5689	6.7124
Q10567	AP-1 complex subunit beta-1 OS=Homo sapiens OX=9606 GN=AP1B1 PE=1 SV=2 - [AP1B1_HUMAN]	14.12	1	6	10	32	6.53459e+06	4.26064e+06	13992055	3.94268e+06	9.08486e+06	3.39495e+06	0	17.1177	8.64	5	5		0				0			26.6294	9.91	6	8		0				0				0			949	104.57	5.05908
O95782	AP-2 complex subunit alpha-1 OS=Homo sapiens OX=9606 GN=AP2A1 PE=1 SV=3 - [AP2A1_HUMAN]	32.34	1	18	21	43	5.61306e+06	3.46106e+06	1.3191e+07	896640	11075535	4.83799e+06	0	13.101	6.76	5	5	13.352	7.06	5	5	28.5982	16.38	8	8		0			60.8241	22.52	16	18	19.408	10.95	7	7		0			977	107.478	7.03467
O94973	AP-2 complex subunit alpha-2 OS=Homo sapiens OX=9606 GN=AP2A2 PE=1 SV=2 - [AP2A2_HUMAN]	18.85	1	9	12	26	5.53881e+06	3.03116e+06	1.24664e+07	896640	1.06733e+07	4.87047e+06	0	10.8674	7.35	4	4	13.2582	9.16	5	6		0				0			34.8083	12.46	9	10		0				0			939	103.895	6.96143
P63010	AP-2 complex subunit beta OS=Homo sapiens OX=9606 GN=AP2B1 PE=1 SV=1 - [AP2B1_HUMAN]	26.79	1	15	19	56	6.53459e+06	4.26064e+06	13992055	3.94268e+06	1.13982e+07	3.82546e+06	0	32.4897	14.41	9	9	21.4632	10.35	6	6	27.2294	10.25	7	7	22.2949	8	6	6	79.5316	22.63	17	21	26.3789	9.71	6	7					937	104.486	5.37646
Q96CW1	AP-2 complex subunit mu OS=Homo sapiens OX=9606 GN=AP2M1 PE=1 SV=2 - [AP2M1_HUMAN]	22.3	1	7	7	7	6.53809e+06	0	0	0	9.48923e+06	4.32517e+06	0		0				0				0				0			19.7967	22.3	7	7		0				0			435	49.623	9.53955
P53680	AP-2 complex subunit sigma OS=Homo sapiens OX=9606 GN=AP2S1 PE=1 SV=2 - [AP2S1_HUMAN]	14.79	1	2	2	2	0	0	0	0	4.00212e+06	0	0		0								0							5.11382	14.79	2	2		0							142	17.0067	6.17627
P02647	Apolipoprotein A-I OS=Homo sapiens OX=9606 GN=APOA1 PE=1 SV=1 - [APOA1_HUMAN]	70.79	1	27	27	297	1.66793e+08	8.83071e+07	1.93981e+08	1.12684e+08	1.32583e+08	1.23644e+08	1.29816e+08	145.605	65.54	19	45	113.421	52.81	16	33	93.7841	58.05	18	30	142.894	65.92	22	46	149.3	67.79	21	47	132.147	66.67	19	42	168.905	63.67	23	54	267	30.7589	5.75732
P02652	Apolipoprotein A-II OS=Homo sapiens OX=9606 GN=APOA2 PE=1 SV=1 - [APOA2_HUMAN]	46	1	4	4	48	6.86715e+06	4.7109e+06	9.65677e+06	6.88601e+06	3.58104e+06	6.57497e+06	5.98805e+06	21.0921	41	3	6	26.6601	31	2	7	37.7187	36	3	10	17.5007	31	2	4	15.3638	31	2	4	41.8089	41	3	11	23.0319	31	2	6	100	11.1679	6.62451
P06727	Apolipoprotein A-IV OS=Homo sapiens OX=9606 GN=APOA4 PE=1 SV=3 - [APOA4_HUMAN]	51.01	1	17	17	48	8.84891e+06	1.76175e+06	2.279e+07	9.47803e+06	3.79478e+06	2.12842e+06	1.59619e+06	32.5766	30.56	10	11	6.62406	5.56	2	2	38.415	31.82	10	12	40.5618	44.95	14	15	8.2244	6.82	2	2	9.18314	13.13	4	4	8.68159	7.58	2	2	396	45.3715	5.37646
P04114	Apolipoprotein B-100 OS=Homo sapiens OX=9606 GN=APOB PE=1 SV=2 - [APOB_HUMAN]	29.41	1	94	94	218	7.5459e+06	4.20665e+06	5.6045e+06	4.72811e+06	649296	1.6601e+07	1.4178e+07	95.8504	8.33	25	26	26.8273	2.48	7	8	11.685	1.34	4	4	57.6392	6.75	18	20	8.78472	0.68	2	3	166.117	14.18	42	47	396.844	26.34	85	110	4563	515.283	7.04932
P02654	Apolipoprotein C-I OS=Homo sapiens OX=9606 GN=APOC1 PE=1 SV=1 - [APOC1_HUMAN]	26.51	1	4	4	22	1.5813e+07	1.32015e+07	3.72423e+07	2.9724e+07	1.24361e+07	1.59638e+07	0	10.6696	26.51	2	3	13.0762	26.51	3	4	10.7452	26.51	2	3	17.2661	26.51	3	5	11.8064	26.51	2	3	13.7253	26.51	3	4					83	9.32609	8.47021
P02656	Apolipoprotein C-III OS=Homo sapiens OX=9606 GN=APOC3 PE=1 SV=1 - [APOC3_HUMAN]	27.27	1	2	2	7	4.93092e+06	4.35939e+06	15131614	7.83305e+06	6.51558e+06	8.71405e+06	0	7.56337	27.27	2	2		0				0				0			8.1577	27.27	2	2	13.6354	27.27	2	3		0			99	10.8455	5.41455
P05090	Apolipoprotein D OS=Homo sapiens OX=9606 GN=APOD PE=1 SV=1 - [APOD_HUMAN]	34.39	1	6	6	19	6.842e+06	3.08218e+06	10790223	0	7.12414e+06	4.16634e+06	1.53684e+07	10.5211	19.05	3	3	7.57009	13.23	2	2		0				0			10.2254	19.05	3	3	7.03021	11.64	2	2	31.0539	34.39	6	9	189	21.2618	5.14795
P02649	Apolipoprotein E OS=Homo sapiens OX=9606 GN=APOE PE=1 SV=1 - [APOE_HUMAN]	59.62	1	18	18	159	8.21599e+06	6.41095e+06	6.18006e+07	3.241e+07	1.2617e+07	2.15325e+07	2.53661e+07	47.3783	39.43	10	11	68.6677	45.74	12	16	103.257	48.58	15	27	134.011	51.42	15	34	55.4278	47.63	12	14	108.068	48.58	14	26	120.554	58.99	17	31	317	36.1318	5.73193
O14791	Apolipoprotein L1 OS=Homo sapiens OX=9606 GN=APOL1 PE=1 SV=5 - [APOL1_HUMAN]	6.53	1	2	2	2	2.06512e+06	0	0	0	0	1.20765e+06	2.75072e+06		0				0				0												0			7.56517	6.53	2	2	398	43.9469	5.80811
Q07812	Apoptosis regulator BAX OS=Homo sapiens OX=9606 GN=BAX PE=1 SV=1 - [BAX_HUMAN]	13.54	1	2	2	2	3.23e+06	1.80223e+06	0	1.88543e+06	0	996456	0	9.71858	13.54	2	2		0				0				0				0				0				0			192	21.1708	5.22412
Q9ULZ3	Apoptosis-associated speck-like protein containing a CARD OS=Homo sapiens OX=9606 GN=PYCARD PE=1 SV=2 - [ASC_HUMAN]	14.36	1	2	2	2	0	0	0	766090	0	0	0		0				0				0			5.51699	14.36	2	2		0				0							195	21.6133	6.34131
P55087	Aquaporin-4 OS=Homo sapiens OX=9606 GN=AQP4 PE=1 SV=2 - [AQP4_HUMAN]	17.34	1	7	7	51	3.12102e+07	4.14747e+07	0	2.42159e+07	1.15084e+08	0	6.64796e+07	3.57741	11.15	2	3	16.5329	11.15	3	9		0			3.70144	11.15	2	2	43.6108	14.55	5	19		0			23.3523	17.34	7	18	323	34.807	7.66455
P54136	Arginine--tRNA ligase, cytoplasmic OS=Homo sapiens OX=9606 GN=RARS PE=1 SV=2 - [SYRC_HUMAN]	11.36	1	5	5	7	3.24314e+06	0	7.66339e+06	0	0	0	0	14.1681	9.7	4	4		0			10.8169	5.91	3	3		0				0				0				0			660	75.3309	6.68311
P00966	Argininosuccinate synthase OS=Homo sapiens OX=9606 GN=ASS1 PE=1 SV=2 - [ASSY_HUMAN]	11.17	1	2	2	2	3.17938e+06	0	0	0	0	0	0	8.85998	11.17	2	2		0				0				0				0				0				0			412	46.501	8.01611
P17174	Aspartate aminotransferase, cytoplasmic OS=Homo sapiens OX=9606 GN=GOT1 PE=1 SV=3 - [AATC_HUMAN]	40.44	1	10	10	21	2.67097e+06	2.27634e+06	0	0	2.81152e+07	857310	0	5.66094	7.99	2	2	12.3259	17.19	4	4		0				0			49.1084	40.44	10	15		0							413	46.2185	7.00537
P00505	Aspartate aminotransferase, mitochondrial OS=Homo sapiens OX=9606 GN=GOT2 PE=1 SV=3 - [AATM_HUMAN]	39.53	1	12	12	34	8.07275e+06	5.55114e+06	1.41105e+07	7.52453e+06	2.70557e+07	5.50337e+06	1.13635e+06	13.9411	12.33	3	5	11.7704	12.79	3	3	12.6681	15.12	4	4	14.6287	15.58	4	4	40.1843	39.53	12	14	6.58714	8.14	2	2	5.0142	9.07	2	2	430	47.4873	9.01221
P14868	Aspartate--tRNA ligase, cytoplasmic OS=Homo sapiens OX=9606 GN=DARS PE=1 SV=2 - [SYDC_HUMAN]	12.77	1	5	5	11	4.6806e+06	4.04705e+06	7.25708e+06	4.55002e+06	6.13576e+06	3.20842e+06	1.09005e+06	7.97402	7.78	3	3	8.30514	6.99	2	2	11.6913	8.78	4	4	8.02407	6.99	2	2		0				0				0			501	57.1	6.55127
Q12797	Aspartyl/asparaginyl beta-hydroxylase OS=Homo sapiens OX=9606 GN=ASPH PE=1 SV=3 - [ASPH_HUMAN]	5.01	1	2	2	2	3.57112e+06	0	1.61163e+07	0	7.52926e+06	5.8521e+06	0		0				0			10.2568	5.01	2	2		0				0				0				0			758	85.8095	5.0083
Q9BXN1	Asporin OS=Homo sapiens OX=9606 GN=ASPN PE=1 SV=2 - [ASPN_HUMAN]	8.68	1	2	2	3	0	0	7.80696e+06	0	0	6.22073e+06	0		0				0				0				0				0			9.4914	8.68	2	3		0			380	43.3893	7.07861
Q15121	Astrocytic phosphoprotein PEA-15 OS=Homo sapiens OX=9606 GN=PEA15 PE=1 SV=2 - [PEA15_HUMAN]	53.08	1	7	7	36	1.11719e+07	1.46622e+07	0	6.67254e+06	2.65092e+07	0	5.37178e+06	17.6885	30	4	5	20.3295	30	4	6					16.191	30	4	5	54.2947	53.08	7	15		0			18.3057	20.77	3	5	130	15.0308	5.021
Q8WXF7	Atlastin-1 OS=Homo sapiens OX=9606 GN=ATL1 PE=1 SV=1 - [ATLA1_HUMAN]	8.96	1	4	4	4	0	0	0	0	2.7909e+06	0	0		0				0				0				0			10.8311	8.96	4	4		0							558	63.5033	6.17627
Q6DD88	Atlastin-3 OS=Homo sapiens OX=9606 GN=ATL3 PE=1 SV=1 - [ATLA3_HUMAN]	31.05	1	9	9	28	6.28184e+06	2.16956e+06	2.52233e+07	4.37805e+06	0	5.25149e+06	0	10.4605	12.01	4	4	2.96382	6.65	2	2	36.8472	31.05	9	11	10.7284	13.49	4	4		0			25.7669	20.89	6	7		0			541	60.5034	5.65576
P24539	ATP synthase F(0) complex subunit B1, mitochondrial OS=Homo sapiens OX=9606 GN=ATP5F1 PE=1 SV=2 - [AT5F1_HUMAN]	33.59	1	7	7	27	1.08563e+07	6.15318e+06	2.54718e+07	7.45579e+06	7.58835e+06	6.49057e+06	0	9.12961	12.5	2	2	10.8906	12.5	3	3	33.9876	29.3	6	11	11.6795	12.5	3	3	11.9187	16.8	4	4	13.6389	16.8	4	4		0			256	28.8903	9.36377
P25705	ATP synthase subunit alpha, mitochondrial OS=Homo sapiens OX=9606 GN=ATP5A1 PE=1 SV=1 - [ATPA_HUMAN]	48.1	1	20	20	147	3.03791e+07	2.93863e+07	1.14859e+08	3.8443e+07	6.07171e+07	1.94141e+07	3.76344e+06	96.2914	34.36	15	27	107.895	43.94	18	28	96.6751	32.19	13	25	76.5643	38.16	15	21	83.1156	35.99	15	23	56.9023	33.09	13	18	16.3725	11.03	5	5	553	59.7136	9.12939
P06576	ATP synthase subunit beta, mitochondrial OS=Homo sapiens OX=9606 GN=ATP5B PE=1 SV=3 - [ATPB_HUMAN]	66.16	1	25	25	238	6.84547e+07	6.01735e+07	1.55324e+08	6.94426e+07	1.01715e+08	4.55141e+07	9.54529e+06	139.099	53.5	18	36	121.383	54.25	19	33	143.602	66.16	22	37	158.83	58.6	20	41	163.919	52.74	21	44	122.109	51.04	18	32	58.8654	45.37	14	15	529	56.5246	5.40186
O75947	ATP synthase subunit d, mitochondrial OS=Homo sapiens OX=9606 GN=ATP5H PE=1 SV=3 - [ATP5H_HUMAN]	70.19	1	9	9	55	1.16377e+07	7.86272e+06	4.89846e+07	9.97296e+06	2.10587e+07	9.24368e+06	0	15.4603	52.8	5	7	24.2086	45.96	5	7	48.6466	58.39	6	14	17.3422	45.96	5	6	42.0279	63.98	8	14	19.4693	49.07	5	7		0			161	18.4795	5.30029
P30049	ATP synthase subunit delta, mitochondrial OS=Homo sapiens OX=9606 GN=ATP5D PE=1 SV=2 - [ATPD_HUMAN]	13.69	1	2	2	6	1.30277e+07	8.63765e+06	2.17472e+07	7.31946e+06	1.59085e+07	7.55514e+06	0		0				0			10.9331	13.69	2	3		0			10.7079	13.69	2	3		0							168	17.4792	5.49072
P56134	ATP synthase subunit f, mitochondrial OS=Homo sapiens OX=9606 GN=ATP5J2 PE=1 SV=3 - [ATPK_HUMAN]	25.53	1	2	2	17	5.32868e+06	6.33113e+06	2.487e+07	6.93046e+06	1.66186e+07	3.98144e+06	986384	6.7345	25.53	2	2	7.13272	25.53	2	2	10.8462	25.53	2	3	10.0698	25.53	2	3	14.995	25.53	2	4	9.55026	25.53	2	3		0			94	10.9107	9.67139
O75964	ATP synthase subunit g, mitochondrial OS=Homo sapiens OX=9606 GN=ATP5L PE=1 SV=3 - [ATP5L_HUMAN]	46.6	1	4	4	19	8.33226e+06	6.65648e+06	22475062	8.94045e+06	1.35117e+07	6.36868e+06	0		0			13.0333	46.6	4	5	5.47704	25.24	2	2	13.4262	46.6	4	5	13.0267	37.86	3	4	8.33475	35.92	3	3					103	11.4212	9.64209
P36542	ATP synthase subunit gamma, mitochondrial OS=Homo sapiens OX=9606 GN=ATP5C1 PE=1 SV=1 - [ATPG_HUMAN]	31.54	1	8	8	16	3.22597e+06	1.59362e+06	1.95355e+07	7.35327e+06	1.06866e+07	3.34291e+06	0	9.56131	11.41	3	3	6.77249	7.72	2	2	12.7957	16.44	4	4		0			23.3514	22.82	6	7		0				0			298	32.9753	9.21729
P48047	ATP synthase subunit O, mitochondrial OS=Homo sapiens OX=9606 GN=ATP5O PE=1 SV=1 - [ATPO_HUMAN]	54.46	1	8	8	36	1.0424e+07	5.13728e+06	3.93749e+07	1.15827e+07	2.10355e+07	5.57139e+06	0	28.8191	39.44	5	7	10.2652	22.54	3	3	13.4754	16.9	2	3	30.6053	44.6	6	8	42.0983	49.3	7	10	14.7734	33.8	5	5					213	23.2627	9.96436
P18859	ATP synthase-coupling factor 6, mitochondrial OS=Homo sapiens OX=9606 GN=ATP5J PE=1 SV=1 - [ATP5J_HUMAN]	45.37	1	4	4	6	1.21261e+07	5.81194e+06	0	0	3.50973e+06	1.1222e+06	0	12.608	45.37	3	3		0											13.5555	44.44	3	3		0				0			108	12.5796	9.5249
O43681	ATPase ASNA1 OS=Homo sapiens OX=9606 GN=ASNA1 PE=1 SV=2 - [ASNA_HUMAN]	17.24	1	4	4	10	4.79079e+06	4.0039e+06	1.3036e+07	2.00107e+06	2.90263e+06	2.61267e+06	516482	6.53948	7.47	2	2	7.60708	13.51	3	3		0				0			7.03491	8.33	2	2	8.70582	7.47	2	3		0			348	38.7674	4.90674
P17858	ATP-dependent 6-phosphofructokinase, liver type OS=Homo sapiens OX=9606 GN=PFKL PE=1 SV=6 - [PFKAL_HUMAN]	24.36	1	9	11	39	1.01854e+07	5.93566e+06	1.7036e+07	8.23955e+06	1.54631e+07	5.1039e+06	0	32.3186	16.28	7	8	40.369	16.28	6	8	23.0513	11.41	6	6	29.6426	16.28	7	7	24.985	13.46	7	7	6.34933	6.67	3	3		0			780	84.9642	7.50342
P08237	ATP-dependent 6-phosphofructokinase, muscle type OS=Homo sapiens OX=9606 GN=PFKM PE=1 SV=2 - [PFKAM_HUMAN]	26.41	1	13	14	20	0	5.35801e+06	8.86849e+06	0	1.70709e+07	0	1.42526e+06		0			32.8249	18.21	8	8		0				0			37.9057	20	11	11		0				0			780	85.1284	7.98682
Q01813	ATP-dependent 6-phosphofructokinase, platelet type OS=Homo sapiens OX=9606 GN=PFKP PE=1 SV=2 - [PFKAP_HUMAN]	25.64	1	13	15	34	4.83223e+06	2.7533e+06	1.1203e+07	6.40233e+06	1.49703e+07	0	0	15.8651	5.99	3	4	20.7785	7.27	3	4	21.5517	7.78	5	5	36.5926	16.07	9	9	48.1981	22.32	12	12		0				0			784	85.5415	7.54736
Q08211	ATP-dependent RNA helicase A OS=Homo sapiens OX=9606 GN=DHX9 PE=1 SV=4 - [DHX9_HUMAN]	19.37	1	18	18	46	7.30389e+06	1.7299e+06	1.9721e+07	3.77484e+06	2.36779e+06	3.44885e+06	0	48.3339	13.46	12	14	6.65249	2.13	2	2	45.3049	11.57	10	13	28.2832	6.69	6	8	15.9366	4.49	4	4	19.9133	5.67	4	5		0			1270	140.869	6.84424
Q92499	ATP-dependent RNA helicase DDX1 OS=Homo sapiens OX=9606 GN=DDX1 PE=1 SV=2 - [DDX1_HUMAN]	18.24	1	8	8	19	6.7595e+06	3.22002e+06	1.17788e+07	3.42614e+06	2.22037e+06	1.10994e+06	0	24.5059	12.7	6	6	11.3201	6.76	3	3	26.4959	14.46	6	6	7.58382	4.32	2	2		0			6.95462	5.14	2	2		0			740	82.3798	7.2251
O00571	ATP-dependent RNA helicase DDX3X OS=Homo sapiens OX=9606 GN=DDX3X PE=1 SV=3 - [DDX3X_HUMAN]	13.14	2	5	6	10	8.19664e+06	1.56796e+06	6.29717e+06	2.82374e+06	0	4.12807e+06	0	11.4672	7.85	3	3		0			6.25965	4.98	2	2	16.2487	8.16	4	4		0				0				0			662	73.198	7.18115
O75882	Attractin OS=Homo sapiens OX=9606 GN=ATRN PE=1 SV=2 - [ATRN_HUMAN]	6.79	1	6	6	7	0	0	0	0	0	0	3.19178e+06		0				0				0				0				0				0			25.1404	6.79	6	7	1429	158.432	7.31299
O95817	BAG family molecular chaperone regulator 3 OS=Homo sapiens OX=9606 GN=BAG3 PE=1 SV=3 - [BAG3_HUMAN]	11.13	1	4	4	6	2.29041e+06	1.43452e+06	0	0	1.99333e+06	0	0	5.74523	5.74	2	2	17.8676	9.39	3	4		0				0				0				0				0			575	61.5569	6.94678
P02730	Band 3 anion transport protein OS=Homo sapiens OX=9606 GN=SLC4A1 PE=1 SV=3 - [B3AT_HUMAN]	27.88	1	17	17	91	1.42387e+07	26653149	4.47844e+07	2.74934e+07	4.72493e+07	4.357e+07	2.44266e+06	27.6121	14.71	7	7	49.8149	19.87	10	13	29.7617	15.7	8	10	52.6045	20.09	11	15	85.645	23.82	13	24	62.752	22.61	13	19	7.5149	5.49	3	3	911	101.727	5.18604
Q9H4G0	Band 4.1-like protein 1 OS=Homo sapiens OX=9606 GN=EPB41L1 PE=1 SV=2 - [E41L1_HUMAN]	13.51	1	7	8	8	0	2.26505e+06	0	0	8.92207e+06	0	0		0				0				0				0			26.8538	13.51	8	8		0				0			881	98.4422	5.61768
O43491	Band 4.1-like protein 2 OS=Homo sapiens OX=9606 GN=EPB41L2 PE=1 SV=1 - [E41L2_HUMAN]	21.49	1	14	16	37	9.08524e+06	6.75208e+06	7.93999e+06	4.67139e+06	1.5444e+07	8.08461e+06	1.54519e+06	14.8978	7.56	4	4	26.8474	9.85	7	8		0				0			44.1797	16.62	12	13	23.5371	10.15	7	8	9.34882	6.07	3	4	1005	112.519	5.43994
Q9Y2J2	Band 4.1-like protein 3 OS=Homo sapiens OX=9606 GN=EPB41L3 PE=1 SV=2 - [E41L3_HUMAN]	15.73	1	9	11	18	1.63695e+06	1.7253e+06	2.19743e+06	1.02415e+06	1.66147e+07	1.25451e+06	1.64335e+06	7.83457	2.94	2	2	7.19824	2.94	2	2		0				0			39.6723	15.73	11	12	7.00458	2.94	2	2		0			1087	120.603	5.18604
O75531	Barrier-to-autointegration factor OS=Homo sapiens OX=9606 GN=BANF1 PE=1 SV=1 - [BAF_HUMAN]	55.06	1	4	4	15	1.52182e+07	7.21378e+06	4.19529e+07	5.64142e+06	9.11465e+06	1.06147e+07	0	15.1819	55.06	4	4	8.17321	29.21	2	2	9.9633	39.33	2	3	12.0904	42.7	3	3	10.5765	40.45	2	3		0							89	10.052	6.0874
P50895	Basal cell adhesion molecule OS=Homo sapiens OX=9606 GN=BCAM PE=1 SV=2 - [BCAM_HUMAN]	14.49	1	6	6	12	1.87782e+06	1.23982e+06	7.22496e+06	1822449	2.60261e+06	901083	0	13.6805	7.48	3	3	10.1893	5.73	2	3	13.4948	4.94	2	3		0			11.8135	6.21	3	3		0				0			628	67.3626	5.80811
P98160	Basement membrane-specific heparan sulfate proteoglycan core protein OS=Homo sapiens OX=9606 GN=HSPG2 PE=1 SV=4 - [PGBM_HUMAN]	16.6	1	42	42	82	1.6516e+07	0	2.87304e+07	5.60939e+06	0	3.81334e+06	2.73505e+07	45.2134	5.03	13	13		0			150.72	13.6	35	42	50.082	5.56	14	14		0			47.7702	4.46	12	13		0			4391	468.532	6.50732
P35613	Basigin OS=Homo sapiens OX=9606 GN=BSG PE=1 SV=2 - [BASI_HUMAN]	23.38	1	6	6	31	1.27495e+07	1.08217e+07	2.2567e+07	7.02344e+06	3.82724e+07	5.58586e+06	7.95896e+06	7.76962	7.79	2	2	16.4873	12.47	3	4	22.4428	16.1	4	5	7.33042	8.31	2	2	32.639	23.38	6	8	14.9235	8.31	2	4	23.0183	16.1	4	6	385	42.1741	5.65576
Q9UHQ4	B-cell receptor-associated protein 29 OS=Homo sapiens OX=9606 GN=BCAP29 PE=1 SV=2 - [BAP29_HUMAN]	12.86	1	3	3	4	0	0	4.27251e+06	1.92696e+06	1.79983e+06	0	0		0				0			8.26816	6.64	2	2		0			7.98151	12.86	2	2									241	28.3022	9.53955
P51572	B-cell receptor-associated protein 31 OS=Homo sapiens OX=9606 GN=BCAP31 PE=1 SV=3 - [BAP31_HUMAN]	34.55	1	7	7	22	9.16061e+06	7.69613e+06	5.07851e+07	5.5328e+06	2.63342e+06	1.02141e+07	1.22079e+06	5.93298	10.16	2	2	5.41803	11.79	2	2	23.6252	19.92	5	9	9.14739	17.89	3	4	6.47005	10.16	2	2	5.21707	18.29	3	3		0			246	27.974	8.44092
Q9NYF8	Bcl-2-associated transcription factor 1 OS=Homo sapiens OX=9606 GN=BCLAF1 PE=1 SV=2 - [BCLF1_HUMAN]	2.83	1	2	2	2	1.41992e+06	0	0	0	0	0	0	2.09094	2.83	2	2		0				0				0				0				0				0			920	106.059	9.979
P02749	Beta-2-glycoprotein 1 OS=Homo sapiens OX=9606 GN=APOH PE=1 SV=3 - [APOH_HUMAN]	56.52	1	16	16	162	6.56046e+07	2.77818e+07	113577441	5.50389e+07	3.69898e+07	7.26897e+07	1.53461e+08	55.4857	47.25	9	15	51.7328	47.25	9	13	77.9812	51.88	13	20	95.0534	48.99	11	24	49.6686	40.58	9	13	117.954	52.17	13	30	177.722	56.23	15	47	345	38.2727	7.97217
P61769	Beta-2-microglobulin OS=Homo sapiens OX=9606 GN=B2M PE=1 SV=1 - [B2MG_HUMAN]	37.82	1	4	4	45	8.59975e+06	8.13631e+06	1.9787e+07	7.76807e+06	6.62118e+06	4.85693e+06	4.00229e+06	13.4565	35.29	3	5	25.3531	35.29	3	9	17.704	37.82	4	5	21.1132	35.29	3	7	14.7587	35.29	3	6	24.6443	35.29	3	10	9.12948	26.89	2	3	119	13.7059	6.52197
P35612	Beta-adducin OS=Homo sapiens OX=9606 GN=ADD2 PE=1 SV=3 - [ADDB_HUMAN]	9.92	1	5	5	5	0	0	0	0	4.25462e+06	0	0		0				0				0				0			15.7603	9.92	5	5		0				0			726	80.8034	5.92236
P16278	Beta-galactosidase OS=Homo sapiens OX=9606 GN=GLB1 PE=1 SV=2 - [BGAL_HUMAN]	7.83	1	3	3	3	0	0	8.80815e+06	0	0	0	0		0				0			10.2171	7.83	3	3		0				0				0				0			677	76.0266	6.56592
P07686	Beta-hexosaminidase subunit beta OS=Homo sapiens OX=9606 GN=HEXB PE=1 SV=3 - [HEXB_HUMAN]	10.61	1	4	4	4	0	0	1.58234e+07	0	0	1.50862e+06	0		0				0			4.95426	5.76	2	2		0				0			6.2231	4.86	2	2		0			556	63.0712	6.75635
Q9H115	Beta-soluble NSF attachment protein OS=Homo sapiens OX=9606 GN=NAPB PE=1 SV=2 - [SNAB_HUMAN]	50	1	11	13	20	4.40129e+06	3.96472e+06	1.56532e+07	1.91526e+06	1.12656e+07	0	0		0				0				0				0			59.1761	50	13	14		0				0			298	33.5355	5.46533
P07814	Bifunctional glutamate/proline--tRNA ligase OS=Homo sapiens OX=9606 GN=EPRS PE=1 SV=5 - [SYEP_HUMAN]	9.66	1	9	9	10	2.75087e+06	587288	4.23398e+06	0	2.31949e+06	0	0	21.0504	6.48	6	6		0			14.3998	3.9	4	4		0				0				0				0			1512	170.483	7.32764
P31939	Bifunctional purine biosynthesis protein PURH OS=Homo sapiens OX=9606 GN=ATIC PE=1 SV=3 - [PUR9_HUMAN]	32.77	1	11	11	41	6.67359e+06	4.521e+06	7.77922e+06	6.352e+06	3.21281e+06	2.12433e+06	0	28.4366	24.16	8	8	27.5755	21.28	7	8	21.6312	11.99	4	5	44.6863	31.25	10	12	14.641	10.47	4	4	10.5576	11.99	4	4		0			592	64.5753	6.7124
P21810	Biglycan OS=Homo sapiens OX=9606 GN=BGN PE=1 SV=2 - [PGS1_HUMAN]	46.47	1	12	12	53	9.80575e+06	5.01919e+06	8.50474e+07	1.6103e+07	1.35719e+07	6.43096e+07	0	15.523	26.09	5	5	5.98084	9.51	2	2	40.2902	28.8	8	13	30.8706	32.88	8	9	12.3041	16.58	4	5	62.0991	39.95	11	19		0			368	41.6275	7.51807
P53004	Biliverdin reductase A OS=Homo sapiens OX=9606 GN=BLVRA PE=1 SV=2 - [BIEA_HUMAN]	22.97	1	5	5	11	3.97747e+06	3.17906e+06	8.60123e+06	5.09353e+06	0	0	0	10.8923	14.86	3	3	7.89664	9.12	2	2	12.8533	13.85	3	3	11.4168	14.86	3	3		0								0			296	33.4073	6.44287
P07738	Bisphosphoglycerate mutase OS=Homo sapiens OX=9606 GN=BPGM PE=1 SV=2 - [PMGE_HUMAN]	12.36	1	3	3	3	0	8.07757e+06	0	6.48413e+06	3.0838e+06	0	0		0				0				0				0			7.14121	12.36	3	3		0				0			259	29.9865	6.53662
P80723	Brain acid soluble protein 1 OS=Homo sapiens OX=9606 GN=BASP1 PE=1 SV=2 - [BASP1_HUMAN]	87.67	1	15	15	92	2.12565e+07	4.15793e+06	8.87811e+06	2.96321e+06	1.1371e+08	5.05559e+06	1.96783e+06	63.0199	77.09	9	18	24.6843	50.66	6	8	18.2415	44.49	5	6	22.6818	57.27	6	9	140.488	87.67	15	38	25.0757	50.66	6	8	13.2062	38.33	4	5	227	22.68	4.62744
Q9UQB8	Brain-specific angiogenesis inhibitor 1-associated protein 2 OS=Homo sapiens OX=9606 GN=BAIAP2 PE=1 SV=1 - [BAIP2_HUMAN]	7.61	1	2	2	2	0	0	0	0	1.23383e+06	0	0		0				0				0				0			6.66493	7.61	2	2		0				0			552	60.8296	8.89502
O75363	Breast carcinoma-amplified sequence 1 OS=Homo sapiens OX=9606 GN=BCAS1 PE=1 SV=2 - [BCAS1_HUMAN]	7.88	1	3	3	3	0	0	0	0	2.98519e+06	0	0		0				0				0				0			10.0397	7.88	3	3		0				0			584	61.6715	5.09717
Q96GW7	Brevican core protein OS=Homo sapiens OX=9606 GN=BCAN PE=1 SV=2 - [PGCB_HUMAN]	17.45	1	11	11	17	0	0	0	0	4.10051e+07	0	1.78521e+06		0				0				0				0			57.9915	17.45	11	17		0				0			911	99.056	4.64014
Q96CX2	BTB/POZ domain-containing protein KCTD12 OS=Homo sapiens OX=9606 GN=KCTD12 PE=1 SV=1 - [KCD12_HUMAN]	31.08	1	7	7	30	8.72354e+06	5.28499e+06	1.19706e+07	3.5778e+06	0	8.59333e+06	473470	16.8508	21.23	5	5	14.1698	24	5	5	24.5383	31.08	7	8	13.5209	18.46	4	4		0			24.1925	24	5	8		0			325	35.6787	5.64307
P11586	C-1-tetrahydrofolate synthase, cytoplasmic OS=Homo sapiens OX=9606 GN=MTHFD1 PE=1 SV=3 - [C1TC_HUMAN]	11.98	1	8	8	9	1.71453e+06	1.86596e+06	3.8007e+06	1.35647e+06	1.00893e+06	0	0	10.3384	5.56	3	3	12.9156	5.24	4	4		0				0			6.61866	2.57	2	2		0							935	101.495	7.29834
P04003	C4b-binding protein alpha chain OS=Homo sapiens OX=9606 GN=C4BPA PE=1 SV=2 - [C4BPA_HUMAN]	48.07	1	20	20	87	1.70717e+07	1.25291e+07	2.64311e+07	2.89433e+07	4.50928e+06	1.79177e+07	1.90701e+07	37.9429	17.76	7	9	39.0133	25.13	9	9	39.0671	25.63	9	9	93.2326	43.72	17	22	19.1474	11.22	5	5	50.0999	32.66	14	14	69.0779	31.66	14	19	597	66.9894	7.29834
P12830	Cadherin-1 OS=Homo sapiens OX=9606 GN=CDH1 PE=1 SV=3 - [CADH1_HUMAN]	10.77	1	6	6	8	1.00823e+07	0	11949206	3.18857e+06	0	0	0	24.004	10.77	6	6		0			10.3239	4.31	2	2		0				0											882	97.3959	4.729
P55290	Cadherin-13 OS=Homo sapiens OX=9606 GN=CDH13 PE=1 SV=1 - [CAD13_HUMAN]	3.65	1	2	2	2	0	298249	0	0	2.26471e+06	2.73722e+06	0						0				0								0			6.99201	3.65	2	2		0			713	78.2379	4.98291
P19022	Cadherin-2 OS=Homo sapiens OX=9606 GN=CDH2 PE=1 SV=4 - [CADH2_HUMAN]	15.34	1	7	7	11	4.00283e+06	5.75299e+06	3.0613e+07	4.10525e+06	6.06598e+06	0	4.67529e+06		0			14.6506	10.04	4	5		0				0			23.5216	11.81	5	6						0			906	99.7473	4.80518
P05937	Calbindin OS=Homo sapiens OX=9606 GN=CALB1 PE=1 SV=2 - [CALB1_HUMAN]	51.34	1	11	11	15	3.09586e+07	0	0	0	6.51958e+06	0	0	48.0071	47.13	10	12		0				0							11.7349	16.86	3	3		0							261	30.006	4.83057
P63098	Calcineurin subunit B type 1 OS=Homo sapiens OX=9606 GN=PPP3R1 PE=1 SV=2 - [CANB1_HUMAN]	44.71	1	5	5	6	5.11125e+06	0	0	1.15574e+06	1.81973e+07	0	0		0				0								0			28.4889	44.71	5	6		0							170	19.2876	4.80518
Q9UQM7	Calcium/calmodulin-dependent protein kinase type II subunit alpha OS=Homo sapiens OX=9606 GN=CAMK2A PE=1 SV=2 - [KCC2A_HUMAN]	32.85	1	9	12	27	0	8.17714e+06	0	5116862	4.93793e+07	0	0		0				0				0				0			101.184	32.85	12	25									478	54.0535	7.07861
Q13554	Calcium/calmodulin-dependent protein kinase type II subunit beta OS=Homo sapiens OX=9606 GN=CAMK2B PE=1 SV=3 - [KCC2B_HUMAN]	24.62	1	5	10	17	0	4.75241e+06	0	5116862	3.8333e+07	0	0		0				0				0				0			64.3761	24.62	10	15		0				0			666	72.632	7.26904
Q13557	Calcium/calmodulin-dependent protein kinase type II subunit delta OS=Homo sapiens OX=9606 GN=CAMK2D PE=1 SV=3 - [KCC2D_HUMAN]	25.45	1	5	8	26	4.84568e+06	7.3778e+06	6.49453e+06	2.3376e+06	3.8333e+07	0	0	18.0914	13.23	4	4	29.5069	14.63	4	6	14.7967	10.82	3	3	12.0891	9.42	3	3	42.8542	19.84	6	10		0				0			499	56.3336	7.25439
Q13555	Calcium/calmodulin-dependent protein kinase type II subunit gamma OS=Homo sapiens OX=9606 GN=CAMK2G PE=1 SV=3 - [KCC2G_HUMAN]	17.92	1	2	6	12	0	4.75241e+06	0	5116862	3.78769e+07	0	0		0				0				0				0			41.4451	17.92	6	10		0				0			558	62.5697	7.82568
O75746	Calcium-binding mitochondrial carrier protein Aralar1 OS=Homo sapiens OX=9606 GN=SLC25A12 PE=1 SV=2 - [CMC1_HUMAN]	11.06	1	4	6	11	2.79404e+06	979929	6.66951e+06	2.09787e+06	3.34715e+06	0	0		0				0			18.7615	8.26	4	5		0			16.2464	9.14	5	5						0			678	74.7149	8.38232
Q9UJS0	Calcium-binding mitochondrial carrier protein Aralar2 OS=Homo sapiens OX=9606 GN=SLC25A13 PE=1 SV=2 - [CMC2_HUMAN]	13.33	1	5	7	9	2.79404e+06	979929	7.1765e+06	1.51062e+06	2.94289e+06	0	0		0				0			14.9309	10.07	5	5	7.65383	3.7	2	2		0				0				0			675	74.1286	8.6167
Q6NUK1	Calcium-binding mitochondrial carrier protein SCaMC-1 OS=Homo sapiens OX=9606 GN=SLC25A24 PE=1 SV=2 - [SCMC1_HUMAN]	7.13	1	3	3	8	5.75146e+06	0	1.45741e+07	1.30303e+06	0	920273	0	6.33873	5.24	2	2					8.42952	5.24	2	2	5.69553	4.4	2	2		0			5.89025	4.4	2	2					477	53.3203	6.32861
Q13938	Calcyphosin OS=Homo sapiens OX=9606 GN=CAPS PE=1 SV=1 - [CAYP1_HUMAN]	38.1	1	7	7	23	8.32781e+06	2.19576e+07	0	4.34612e+06	7.84007e+06	0	2.00009e+07	9.38182	20.63	3	3	24.7906	32.8	6	7		0			11.0778	20.63	3	3		0				0			33.483	38.1	7	10	189	20.9543	4.89404
Q05682	Caldesmon OS=Homo sapiens OX=9606 GN=CALD1 PE=1 SV=3 - [CALD1_HUMAN]	29.89	1	18	18	52	1.16493e+07	1.81314e+06	2.5466e+07	4.7934e+06	1.38019e+06	8.16413e+06	0	36.3574	13.24	7	11		0			54.239	24.21	13	17	37.019	11.35	6	11		0			45.7284	18.41	9	13		0			793	93.1754	5.65576
P0DP23	Calmodulin-1 OS=Homo sapiens OX=9606 GN=CALM1 PE=1 SV=1 - [CALM1_HUMAN]	46.98	1	7	7	61	1.77753e+08	8.71979e+07	5.22086e+07	1.55923e+07	3.35233e+08	1.55449e+08	1.3774e+07	40.2249	45.64	4	10	31.7726	46.98	4	7	11.6375	19.46	2	3	10.3602	32.21	4	4	92.3755	46.98	7	22	39.6955	46.98	5	10	13.6843	32.21	4	5	149	16.8268	4.22119
P27482	Calmodulin-like protein 3 OS=Homo sapiens OX=9606 GN=CALML3 PE=1 SV=2 - [CALL3_HUMAN]	75.84	1	9	9	36	7.69286e+07	2.9935e+06	1.23397e+08	1.366e+07	0	0	569378	57.8905	64.43	7	13	14.297	29.53	3	3	67.675	75.84	9	16	13.1516	41.61	4	4		0				0				0			149	16.88	4.42432
Q9NZT1	Calmodulin-like protein 5 OS=Homo sapiens OX=9606 GN=CALML5 PE=1 SV=2 - [CALL5_HUMAN]	23.29	1	2	2	2	2.9167e+06	0	9.43103e+06	0	0	0	0		0				0			9.05298	23.29	2	2		0								0				0			146	15.8828	4.43701
P27824	Calnexin OS=Homo sapiens OX=9606 GN=CANX PE=1 SV=2 - [CALX_HUMAN]	39.02	1	22	22	150	4.98222e+07	4.62058e+07	1.80126e+08	3.90679e+07	3.89261e+07	5.45217e+07	8.5331e+06	61.5017	28.89	12	19	56.1927	28.21	13	18	93.8484	33.78	16	31	68.0671	32.43	16	24	95.2963	31.76	18	27	84.775	32.09	16	26	20.2682	10.47	4	5	592	67.5259	4.60205
P04632	Calpain small subunit 1 OS=Homo sapiens OX=9606 GN=CAPNS1 PE=1 SV=1 - [CPNS1_HUMAN]	41.42	1	6	6	48	2.36309e+07	1.54726e+07	3.46151e+07	4.41922e+06	6.61985e+06	8.95359e+06	2.40351e+06	35.8067	30.22	5	8	40.5885	30.22	5	9	51.0152	36.57	5	12	23.9396	21.64	3	5	17.2327	16.42	3	4	25.2897	25.37	4	6	17.1028	25.37	4	4	268	28.2977	5.19873
P07384	Calpain-1 catalytic subunit OS=Homo sapiens OX=9606 GN=CAPN1 PE=1 SV=1 - [CAN1_HUMAN]	26.05	1	12	12	40	1.33743e+07	8.70677e+06	3.00905e+07	7.57339e+06	7.41935e+06	4.15757e+06	1.61756e+06	31.3505	17.23	7	9	23.4241	14.15	6	7	18.1784	9.94	4	5	17.168	9.24	4	5	24.1862	13.03	6	7	18.71	9.1	4	5	7.92994	4.48	2	2	714	81.8382	5.66846
P17655	Calpain-2 catalytic subunit OS=Homo sapiens OX=9606 GN=CAPN2 PE=1 SV=6 - [CAN2_HUMAN]	47.14	1	19	19	61	2.45812e+07	1.91874e+07	1.66808e+07	1.45566e+07	7.0795e+06	6.60035e+06	2.10987e+06	67.1494	33.43	13	16	69.0507	34	15	17	35.5809	20.43	8	9	35.4778	25.57	9	10	10.9033	5.43	2	2	19.3317	12.57	5	5	8.00271	5.14	2	2	700	79.9448	4.98291
P20810	Calpastatin OS=Homo sapiens OX=9606 GN=CAST PE=1 SV=4 - [ICAL_HUMAN]	25.71	1	10	10	13	6.5276e+06	2942041	2.34595e+07	3.39045e+06	0	0	0	16.0661	17.23	6	6		0			23.7868	15.54	7	7		0				0				0				0			708	76.5263	5.07178
Q99439	Calponin-2 OS=Homo sapiens OX=9606 GN=CNN2 PE=1 SV=4 - [CNN2_HUMAN]	25.24	1	6	6	14	6.02082e+06	1.28957e+06	1.93609e+07	4.13614e+06	0	6.0626e+06	0	13.301	14.24	3	3		0			23.0645	25.24	6	6	13.2186	14.24	3	3		0			11.2671	10.68	2	2		0			309	33.6753	7.32764
Q15417	Calponin-3 OS=Homo sapiens OX=9606 GN=CNN3 PE=1 SV=1 - [CNN3_HUMAN]	20.06	1	6	6	19	4.11885e+06	6.98191e+06	7.34156e+06	5.45676e+06	0	4.8319e+06	427693	20.0581	13.37	4	5	20.0513	12.77	4	5		0			6.88433	9.12	2	2		0			23.7217	12.77	4	6		0			329	36.3908	6.04932
P27797	Calreticulin OS=Homo sapiens OX=9606 GN=CALR PE=1 SV=1 - [CALR_HUMAN]	60.67	1	16	16	226	7.65468e+07	3.67451e+07	2.2512e+08	6.00565e+07	4.21375e+07	7.73866e+07	1.01261e+07	121.058	49.64	12	33	104.913	46.76	11	28	189.014	58.03	15	49	121.635	49.64	13	32	79.8386	47.48	11	23	169.56	52.28	14	44	56.8691	47	10	17	417	48.1118	4.43701
O43852	Calumenin OS=Homo sapiens OX=9606 GN=CALU PE=1 SV=2 - [CALU_HUMAN]	45.08	1	9	9	27	1.3155e+07	4.55623e+06	4.82836e+07	5.88708e+06	3.14404e+06	7.78408e+06	0	14.6656	17.46	3	4		0			52.7265	36.19	7	13	7.7658	13.33	2	2	8.25356	20.63	4	4	15.813	17.46	3	4					315	37.0835	4.64014
Q8NCB2	CaM kinase-like vesicle-associated protein OS=Homo sapiens OX=9606 GN=CAMKV PE=2 SV=2 - [CAMKV_HUMAN]	19.36	1	6	6	6	0	0	0	0	1.04726e+07	0	0						0				0				0			23.3635	19.36	6	6		0				0			501	54.3202	5.5542
P22694	cAMP-dependent protein kinase catalytic subunit beta OS=Homo sapiens OX=9606 GN=PRKACB PE=1 SV=2 - [KAPCB_HUMAN]	9.97	1	3	3	3	0	0	0	0	5.50715e+06	0	0		0				0				0				0			7.31296	9.97	3	3		0				0			351	40.597	8.77783
P10644	cAMP-dependent protein kinase type I-alpha regulatory subunit OS=Homo sapiens OX=9606 GN=PRKAR1A PE=1 SV=1 - [KAP0_HUMAN]	9.19	1	2	2	2	0	0	0	0	2.27976e+06	0	0		0				0				0				0			4.72341	9.19	2	2		0				0			381	42.955	5.35107
P13861	cAMP-dependent protein kinase type II-alpha regulatory subunit OS=Homo sapiens OX=9606 GN=PRKAR2A PE=1 SV=2 - [KAP2_HUMAN]	28.47	1	7	8	16	1.64689e+06	0	1.18326e+07	3.74616e+06	4.33916e+06	1.01856e+06	0	11.2792	10.4	3	3		0			29.1837	19.31	5	7	8.9621	8.17	2	2	19.488	10.89	3	4		0				0			404	45.49	5.07178
P31323	cAMP-dependent protein kinase type II-beta regulatory subunit OS=Homo sapiens OX=9606 GN=PRKAR2B PE=1 SV=3 - [KAP3_HUMAN]	18.9	1	4	5	6	0	0	0	0	8.08422e+06	0	0		0				0				0				0			26.2427	18.9	5	6		0							418	46.2729	4.91943
Q9UDT6	CAP-Gly domain-containing linker protein 2 OS=Homo sapiens OX=9606 GN=CLIP2 PE=1 SV=1 - [CLIP2_HUMAN]	3.25	1	2	2	2	0	810931	0	0	1.16504e+06	0	0		0			8.42224	3.25	2	2		0				0				0				0				0			1046	115.767	6.72705
Q14444	Caprin-1 OS=Homo sapiens OX=9606 GN=CAPRIN1 PE=1 SV=2 - [CAPR1_HUMAN]	5.78	1	3	3	3	1.98994e+06	0	1.28215e+06	1.03728e+06	0	0	0	9.86474	5.78	3	3		0				0				0				0				0				0			709	78.318	5.24951
P00915	Carbonic anhydrase 1 OS=Homo sapiens OX=9606 GN=CA1 PE=1 SV=2 - [CAH1_HUMAN]	67.82	1	13	13	194	1.12089e+08	1.31439e+08	7.85578e+07	9.23908e+07	1.62551e+08	1.08545e+08	2.05896e+07	85.9955	54.02	11	27	113.541	63.22	12	37	36.8749	55.94	9	14	87.2735	54.02	11	30	100.124	53.26	10	34	111.329	58.62	12	40	45.5442	45.21	8	12	261	28.8524	7.12256
P00918	Carbonic anhydrase 2 OS=Homo sapiens OX=9606 GN=CA2 PE=1 SV=2 - [CAH2_HUMAN]	56.54	1	12	12	80	1.96948e+07	2.51861e+07	4.84064e+07	3.53164e+07	6.0183e+07	1.67783e+07	1.4811e+06	34.2483	36.15	8	11	38.7225	38.46	8	12	35.3112	48.08	8	11	49.1359	56.54	12	16	57.6947	50.38	10	18	29.6858	35.38	7	10	7.02689	10.77	2	2	260	29.2279	7.40088
P16152	Carbonyl reductase [NADPH] 1 OS=Homo sapiens OX=9606 GN=CBR1 PE=1 SV=3 - [CBR1_HUMAN]	61.73	1	11	13	110	5.51655e+07	6.72347e+07	2.10064e+07	5.39828e+07	6.24409e+07	7.48469e+06	1.15394e+07	72.8172	57.04	11	19	105.575	55.6	11	25	17.6903	21.3	4	4	84.4011	57.4	11	21	88.4594	55.23	11	22	30.1827	33.94	7	8	36.26	37.91	8	11	277	30.3559	8.32373
O75828	Carbonyl reductase [NADPH] 3 OS=Homo sapiens OX=9606 GN=CBR3 PE=1 SV=3 - [CBR3_HUMAN]	44.04	1	6	8	46	3.2931e+07	3.893e+07	2.02668e+07	3.2787e+07	3.17003e+07	7.64545e+06	9.33379e+06	27.0895	19.13	4	7	54.224	44.04	8	14		0			41.6773	27.44	6	11		0				0				0			277	30.8307	6.17627
Q96IY4	Carboxypeptidase B2 OS=Homo sapiens OX=9606 GN=CPB2 PE=1 SV=2 - [CBPB2_HUMAN]	5.67	1	2	2	2	0	0	1.42786e+07	3.96574e+06	0	1.84848e+06	0		0				0			5.79738	5.67	2	2		0								0				0			423	48.3934	7.7085
P22792	Carboxypeptidase N subunit 2 OS=Homo sapiens OX=9606 GN=CPN2 PE=1 SV=3 - [CPN2_HUMAN]	10.83	1	3	3	3	0	0	0	0	0	0	4.28942e+06										0								0							14.1938	10.83	3	3	545	60.5181	5.98584
P50416	Carnitine O-palmitoyltransferase 1, liver isoform OS=Homo sapiens OX=9606 GN=CPT1A PE=1 SV=2 - [CPT1A_HUMAN]	3.1	1	2	2	2	1.26444e+06	914125	0	1.10946e+06	0	0	0		0				0				0			7.60149	3.1	2	2		0				0				0			773	88.3107	8.646
P49747	Cartilage oligomeric matrix protein OS=Homo sapiens OX=9606 GN=COMP PE=1 SV=2 - [COMP_HUMAN]	9.78	1	3	3	5	0	0	0	0	0	3.35315e+06	1.39035e+06		0				0				0				0				0			3.21167	6.87	2	2	5.05415	9.78	3	3	757	82.8076	4.60205
P68400	Casein kinase II subunit alpha OS=Homo sapiens OX=9606 GN=CSNK2A1 PE=1 SV=1 - [CSK21_HUMAN]	10.23	1	2	2	4	2.49497e+06	2.89529e+06	1.01159e+07	0	2.75286e+06	0	0		0				0			7.13685	10.23	2	2					7.92734	10.23	2	2		0							391	45.1148	7.73779
P04040	Catalase OS=Homo sapiens OX=9606 GN=CAT PE=1 SV=3 - [CATA_HUMAN]	41.75	1	19	19	81	2.06133e+07	2.86488e+07	2.54788e+07	1.51177e+07	2.41685e+07	2.10732e+07	4.65856e+06	39.9233	34.72	11	12	62.1569	32.45	13	16	26.571	26	9	9	38.1284	24.48	10	10	45.1649	27.89	12	13	59.2153	32.26	13	16	18.2677	14.8	5	5	527	59.7188	7.38623
P21964	Catechol O-methyltransferase OS=Homo sapiens OX=9606 GN=COMT PE=1 SV=2 - [COMT_HUMAN]	45.02	1	7	7	27	6.00185e+07	1.13858e+07	3.43537e+07	6.96152e+06	5.9746e+06	4.93159e+06	0	20.8523	34.69	6	6	18.2271	30.26	5	5	27.3375	30.63	5	7	15.4741	21.77	3	4	9.62037	14.76	3	3	5.69083	14.39	2	2		0			271	30.0176	5.46533
P35221	Catenin alpha-1 OS=Homo sapiens OX=9606 GN=CTNNA1 PE=1 SV=1 - [CTNA1_HUMAN]	49.01	1	24	27	74	1.65891e+07	4.45537e+06	2.45879e+07	6.54467e+06	5.34595e+06	3.70912e+06	0	103.528	44.92	23	24	51.3126	19.32	12	14	70.0374	22.63	12	16	54.5839	24.72	14	15		0			12.901	5.3	3	3		0			906	100.009	6.29053
P26232	Catenin alpha-2 OS=Homo sapiens OX=9606 GN=CTNNA2 PE=1 SV=5 - [CTNA2_HUMAN]	20.67	1	10	13	24	6.50837e+06	3.55217e+06	9.63711e+06	2.30391e+06	8.09471e+06	0	0		0			16.4753	5.56	4	5		0				0			42.0025	15.42	10	11		0				0			953	105.247	5.70654
P35222	Catenin beta-1 OS=Homo sapiens OX=9606 GN=CTNNB1 PE=1 SV=1 - [CTNB1_HUMAN]	39.56	1	15	17	65	1.86319e+07	8.21986e+06	4.35133e+07	1.30932e+07	9.89169e+06	1.89795e+06	1.00133e+06	61.1381	27.53	12	16	40.6992	21.25	9	11	44.7985	22.54	11	12	53.1356	25.99	12	14	24.769	16.65	7	9	10.2303	3.07	2	3		0			781	85.4422	5.85889
O60716	Catenin delta-1 OS=Homo sapiens OX=9606 GN=CTNND1 PE=1 SV=1 - [CTND1_HUMAN]	17.36	1	10	10	19	9.69033e+06	2.54952e+06	1.88276e+07	2.81961e+06	0	0	0	24.5009	11.47	6	7	7.9898	5.99	3	3	18.8258	7.85	5	5	14.5378	5.37	3	4		0				0				0			968	108.103	6.22705
P49913	Cathelicidin antimicrobial peptide OS=Homo sapiens OX=9606 GN=CAMP PE=1 SV=1 - [CAMP_HUMAN]	14.12	1	2	2	3	0	0	5.36647e+06	0	0	3.55424e+06	0		0				0				0				0				0			7.33587	14.12	2	3		0			170	19.2892	9.40771
P07858	Cathepsin B OS=Homo sapiens OX=9606 GN=CTSB PE=1 SV=3 - [CATB_HUMAN]	39.82	1	10	10	68	3.42399e+07	1.3309e+07	9.14697e+07	2.62094e+07	1.23143e+07	3.77245e+07	8.31777e+06	46.5143	35.1	8	12	15.985	21.83	5	5	90.9156	29.2	8	20	35.0282	32.74	8	10	7.67037	16.52	4	4	46.405	35.1	8	13	13.2701	13.86	3	4	339	37.7968	6.30322
P07339	Cathepsin D OS=Homo sapiens OX=9606 GN=CTSD PE=1 SV=1 - [CATD_HUMAN]	39.56	1	13	13	102	1.87148e+07	1.28181e+07	7.78372e+07	1.91281e+07	2.33472e+07	4.49976e+07	6.30529e+06	38.5928	30.58	9	12	31.0048	29.37	8	9	71.9014	33.74	10	19	59.6255	33.74	10	18	49.4418	23.54	6	12	73.7517	35.92	10	21	35.4039	32.04	9	11	412	44.5236	6.53662
P08311	Cathepsin G OS=Homo sapiens OX=9606 GN=CTSG PE=1 SV=2 - [CATG_HUMAN]	15.29	1	2	2	2	0	0	0	0	0	3.6673e+06	0										0								0			5.27531	15.29	2	2		0			255	28.8191	11.1948
P43235	Cathepsin K OS=Homo sapiens OX=9606 GN=CTSK PE=1 SV=1 - [CATK_HUMAN]	13.07	1	2	2	2	0	0	5.06213e+06	0	0	0	0		0							7.04058	13.07	2	2						0				0				0			329	36.9424	8.48486
P25774	Cathepsin S OS=Homo sapiens OX=9606 GN=CTSS PE=1 SV=3 - [CATS_HUMAN]	9.06	1	2	2	2	0	0	0	0	0	4.38032e+06	0		0				0				0				0				0			8.20111	9.06	2	2		0			331	37.4713	8.33838
Q9UBR2	Cathepsin Z OS=Homo sapiens OX=9606 GN=CTSZ PE=1 SV=1 - [CATZ_HUMAN]	20.13	1	5	5	12	2.27852e+06	0	1.25891e+07	2797629	4.60474e+06	6.4084e+06	0		0							20.1168	10.89	3	5		0			9.10447	9.57	2	2	19.6372	16.17	4	5					303	33.8462	7.10791
P20645	Cation-dependent mannose-6-phosphate receptor OS=Homo sapiens OX=9606 GN=M6PR PE=1 SV=1 - [MPRD_HUMAN]	19.13	1	3	3	4	0	0	5.95489e+06	0	4.43961e+06	5.38545e+06	0		0							9.25717	11.55	2	2		0			5.81413	12.64	2	2		0				0			277	30.9734	5.8335
P11717	Cation-independent mannose-6-phosphate receptor OS=Homo sapiens OX=9606 GN=IGF2R PE=1 SV=3 - [MPRI_HUMAN]	7.43	1	12	12	13	0	0	2.06018e+07	0	0	1.8016e+06	0		0				0			39.952	7.43	12	13		0				0				0				0			2491	274.199	5.93506
Q6NZI2	Caveolae-associated protein 1 OS=Homo sapiens OX=9606 GN=CAVIN1 PE=1 SV=1 - [CAVN1_HUMAN]	22.05	1	5	5	22	9.21951e+06	4.99196e+06	9.21069e+06	5.37862e+06	8.10674e+06	1.6335e+07	0	19.4	19.23	4	4	16.2899	15.38	3	3	13.7988	11.28	3	3	11.095	8.97	2	2	21.9867	15.38	3	4	31.4409	19.23	4	6		0			390	43.4498	5.60498
Q03135	Caveolin-1 OS=Homo sapiens OX=9606 GN=CAV1 PE=1 SV=4 - [CAV1_HUMAN]	19.66	1	2	2	7	0	0	2.26628e+07	3.60591e+06	5.69153e+06	6.12836e+06	0		0								0			10.5674	19.66	2	3	4.34425	19.66	2	2	3.44372	19.66	2	2					178	20.4585	6.02393
Q96F85	CB1 cannabinoid receptor-interacting protein 1 OS=Homo sapiens OX=9606 GN=CNRIP1 PE=1 SV=1 - [CNRP1_HUMAN]	42.07	1	4	4	4	0	1.71426e+06	0	0	6.47024e+06	0	0		0				0				0							12.6488	42.07	4	4		0							164	18.6366	7.94287
Q6YHK3	CD109 antigen OS=Homo sapiens OX=9606 GN=CD109 PE=1 SV=2 - [CD109_HUMAN]	10.45	1	9	9	18	1.63562e+06	1.31651e+06	4.84075e+06	729727	0	242473	1.91954e+06	10.1579	3.32	3	3	16.6641	4.43	4	4	16.1118	5.54	4	4	8.35308	2.63	2	2		0				0			16.8113	4.78	4	5	1445	161.587	5.84619
Q13740	CD166 antigen OS=Homo sapiens OX=9606 GN=ALCAM PE=1 SV=2 - [CD166_HUMAN]	26.93	1	10	10	40	1.09674e+07	4.68144e+06	1.17809e+07	2.67579e+06	1.07153e+07	3.31937e+06	3.55909e+06	43.5231	19.21	6	9	16.6766	10.98	3	4	10.0333	9.09	2	2	12.0954	10.98	3	3	33.9192	23.33	8	9	34.3479	20.41	6	8	23.9458	14.92	4	5	583	65.0611	6.25244
Q5ZPR3	CD276 antigen OS=Homo sapiens OX=9606 GN=CD276 PE=1 SV=1 - [CD276_HUMAN]	8.61	1	2	2	2	0	0	9.76447e+06	0	0	0	0		0							10.62	8.61	2	2		0								0							534	57.1995	4.90674
P16070	CD44 antigen OS=Homo sapiens OX=9606 GN=CD44 PE=1 SV=3 - [CD44_HUMAN]	8.22	1	6	6	43	2.93048e+07	4.51306e+07	1.73332e+07	1.83132e+07	6.56954e+07	6.1415e+06	2.01098e+07	18.4854	8.22	5	6	26.5572	8.22	6	8		0			15.4328	6.87	4	4	37.1016	8.22	5	11	16.1737	5.53	3	4	31.0914	5.12	4	10	742	81.4874	5.32568
O43866	CD5 antigen-like OS=Homo sapiens OX=9606 GN=CD5L PE=1 SV=1 - [CD5L_HUMAN]	36.31	1	8	8	13	2.67684e+06	963728	9.04703e+06	2.77228e+06	0	706277	1.06446e+07		0				0			12.9259	15.85	3	3		0								0			41.6313	36.31	8	10	347	38.0629	5.46533
P13987	CD59 glycoprotein OS=Homo sapiens OX=9606 GN=CD59 PE=1 SV=1 - [CD59_HUMAN]	19.53	1	4	4	48	3.80925e+07	3.41319e+07	1.14099e+08	2.27775e+07	5.4515e+07	2.9659e+07	1.20017e+07	27.3475	19.53	4	7	32.6227	19.53	4	8	32.8874	19.53	3	9	24.0898	19.53	4	6	27.1706	18.75	3	7	23.4783	18.75	3	6	20.0668	18.75	3	5	128	14.1678	6.48096
P60033	CD81 antigen OS=Homo sapiens OX=9606 GN=CD81 PE=1 SV=1 - [CD81_HUMAN]	25	1	3	3	43	2.45015e+07	3.27089e+07	3.32022e+07	1.77556e+07	1.14812e+08	2.93318e+07	3.89422e+07	26.5663	25	3	5	24.7761	25	3	5	15.5625	15.25	2	3	21.4319	25	3	4	52.0051	25	3	10	44.9754	25	3	9	35.7831	25	3	7	236	25.7921	5.2876
P21926	CD9 antigen OS=Homo sapiens OX=9606 GN=CD9 PE=1 SV=4 - [CD9_HUMAN]	20.61	1	3	3	16	9.43383e+06	1.16833e+07	3.54957e+07	4.10543e+06	1.04684e+07	0	4.83808e+06		0				0			27.4671	15.35	2	5	19.5605	16.23	2	4	10.5804	16.23	2	3		0			20.108	15.35	2	4	228	25.399	7.15186
Q8TCZ2	CD99 antigen-like protein 2 OS=Homo sapiens OX=9606 GN=CD99L2 PE=1 SV=1 - [C99L2_HUMAN]	12.98	1	2	2	2	0	0	0	0	2.48293e+06	0	0						0				0				0			7.68776	12.98	2	2		0				0			262	27.9687	5.13525
Q9H3Q1	Cdc42 effector protein 4 OS=Homo sapiens OX=9606 GN=CDC42EP4 PE=1 SV=1 - [BORG4_HUMAN]	12.64	1	2	2	2	0	2.65746e+06	0	0	4.98656e+06	0	0		0				0				0				0			8.24613	12.64	2	2		0				0			356	37.9566	5.18604
Q9NZ45	CDGSH iron-sulfur domain-containing protein 1 OS=Homo sapiens OX=9606 GN=CISD1 PE=1 SV=1 - [CISD1_HUMAN]	25.93	1	2	2	4	0	0	16839065	4.42104e+06	3.13223e+07	9.03914e+06	1.34062e+06						0				0				0			18.1481	25.93	2	4		0				0			108	12.1912	9.08545
Q9BY67	Cell adhesion molecule 1 OS=Homo sapiens OX=9606 GN=CADM1 PE=1 SV=2 - [CADM1_HUMAN]	17.42	1	3	3	5	887408	3.05687e+06	0	1.55568e+06	5.62817e+06	0	0		0			7.60055	11.54	2	2		0				0			12.715	17.42	3	3		0				0			442	48.4784	5.07178
Q8N3J6	Cell adhesion molecule 2 OS=Homo sapiens OX=9606 GN=CADM2 PE=2 SV=1 - [CADM2_HUMAN]	20.46	1	4	4	6	0	0	0	0	1.45495e+07	0	0		0															22.4679	20.46	4	6						0			435	47.5242	5.32568
Q8N126	Cell adhesion molecule 3 OS=Homo sapiens OX=9606 GN=CADM3 PE=1 SV=1 - [CADM3_HUMAN]	38.94	1	10	10	28	1.45025e+06	1.06695e+07	0	1.54348e+06	2.53669e+07	0	2.33824e+06	5.22271	4.77	2	2	32.202	29.65	7	9		0				0			41.2715	35.93	9	15		0			2.90606	11.81	2	2	398	43.2727	6.0874
Q8NFZ8	Cell adhesion molecule 4 OS=Homo sapiens OX=9606 GN=CADM4 PE=1 SV=1 - [CADM4_HUMAN]	28.09	1	7	7	12	0	4.73735e+06	0	0	1.29196e+07	0	3.57622e+06					4.57578	9.54	2	2		0				0			30.4836	28.09	7	8					7.68585	9.54	2	2	388	42.7588	6.30322
Q8N163	Cell cycle and apoptosis regulator protein 2 OS=Homo sapiens OX=9606 GN=CCAR2 PE=1 SV=2 - [CCAR2_HUMAN]	4.33	1	3	3	3	2.57916e+06	0	2.33938e+06	0	0	0	0	11.3277	4.33	3	3		0				0				0				0				0				0			923	102.838	5.22412
Q8N111	Cell cycle exit and neuronal differentiation protein 1 OS=Homo sapiens OX=9606 GN=CEND1 PE=1 SV=1 - [CEND_HUMAN]	22.15	1	3	3	5	0	0	0	0	5.07276e+06	0	0		0				0											15.2733	22.15	3	5									149	14.9448	9.20264
P60953	Cell division control protein 42 homolog OS=Homo sapiens OX=9606 GN=CDC42 PE=1 SV=2 - [CDC42_HUMAN]	42.41	1	5	6	70	2.10357e+07	1.56471e+07	4.07666e+07	1.80565e+07	2.24734e+07	1.53478e+07	3.88897e+06	35.2376	36.65	5	11	38.9262	25.65	4	11	35.8028	31.41	5	11	29.1754	25.65	4	9	44.5901	25.65	4	13	34.7724	25.65	4	11	15.6332	19.9	3	4	191	21.245	6.55127
P43121	Cell surface glycoprotein MUC18 OS=Homo sapiens OX=9606 GN=MCAM PE=1 SV=2 - [MUC18_HUMAN]	7.74	1	2	2	2	0	0	7.58536e+06	0	2.91557e+06	0	0		0				0			7.70959	7.74	2	2		0				0				0				0			646	71.5626	5.75732
P62633	Cellular nucleic acid-binding protein OS=Homo sapiens OX=9606 GN=CNBP PE=1 SV=1 - [CNBP_HUMAN]	23.16	1	3	3	6	6.34839e+06	0	1.10688e+07	0	0	0	0	10.4398	23.16	3	3		0			5.11186	15.25	2	3		0				0								0			177	19.4496	7.7085
P29762	Cellular retinoic acid-binding protein 1 OS=Homo sapiens OX=9606 GN=CRABP1 PE=1 SV=2 - [RABP1_HUMAN]	51.09	1	6	6	19	3.14498e+06	1.95074e+06	3.52526e+06	1.94666e+06	0	1.0425e+07	0	3.59664	19.71	2	2	8.60659	37.23	3	3	7.3297	27.01	3	3	4.23055	19.71	2	2		0			26.4149	51.09	6	9					137	15.5557	5.37646
P00450	Ceruloplasmin OS=Homo sapiens OX=9606 GN=CP PE=1 SV=1 - [CERU_HUMAN]	47.7	1	38	38	204	3.64575e+07	1.47778e+07	9.82681e+06	1.17971e+07	1.0927e+07	8.29592e+06	5.17063e+07	166.469	37	26	42	109.877	39.81	22	29	18.2707	9.67	6	6	89.1249	26.76	17	23	49.2275	15.4	11	13	50.334	19.34	12	14	311.02	47.61	33	77	1065	122.128	5.71924
O00408	cGMP-dependent 3',5'-cyclic phosphodiesterase OS=Homo sapiens OX=9606 GN=PDE2A PE=1 SV=1 - [PDE2A_HUMAN]	5.42	1	2	2	2	0	0	0	0	2.27213e+06	0	0		0				0				0				0			8.33291	5.42	2	2		0				0			941	105.649	5.41455
P36222	Chitinase-3-like protein 1 OS=Homo sapiens OX=9606 GN=CHI3L1 PE=1 SV=2 - [CH3L1_HUMAN]	28.46	1	8	8	9	0	698304	0	0	0	0	4.65332e+06		0				0				0				0				0							33.6046	28.46	8	9	383	42.5984	8.45557
Q13231	Chitotriosidase-1 OS=Homo sapiens OX=9606 GN=CHIT1 PE=1 SV=1 - [CHIT1_HUMAN]	18.88	1	6	6	7	0	0	0	0	0	0	3.39097e+06		0												0											29.4917	18.88	6	7	466	51.6484	6.96143
O00299	Chloride intracellular channel protein 1 OS=Homo sapiens OX=9606 GN=CLIC1 PE=1 SV=4 - [CLIC1_HUMAN]	49.38	1	10	10	67	2.24284e+07	1.45587e+07	4.4808e+07	1.85908e+07	4.96367e+06	1.28435e+07	1.24187e+06	68.9448	49.38	10	17	51.626	45.64	9	12	41.562	43.98	7	11	41.0261	48.96	8	10	20.2147	36.51	5	5	36.1218	36.1	7	9	11.8776	16.6	3	3	241	26.9057	5.17334
O95833	Chloride intracellular channel protein 3 OS=Homo sapiens OX=9606 GN=CLIC3 PE=1 SV=2 - [CLIC3_HUMAN]	24.15	1	3	3	3	0	0	4.01119e+06	0	0	0	0		0							9.58857	24.15	3	3		0								0				0			236	26.6317	6.43018
Q9Y696	Chloride intracellular channel protein 4 OS=Homo sapiens OX=9606 GN=CLIC4 PE=1 SV=4 - [CLIC4_HUMAN]	58.5	1	9	9	44	1.96117e+07	1.88627e+07	1.60289e+07	1.20633e+07	1.42778e+07	5.87395e+06	868471	37.3756	36.76	6	9	51.0749	58.5	9	13	16.9427	19.76	3	4	19.3456	18.18	3	5	35.7922	35.18	5	8	20.7811	19.76	3	5		0			253	28.7537	5.59229
Q8WWI5	Choline transporter-like protein 1 OS=Homo sapiens OX=9606 GN=SLC44A1 PE=1 SV=1 - [CTL1_HUMAN]	9.13	1	4	4	4	0	0	5.91221e+06	1.08222e+06	9.9003e+06	0	0		0				0				0				0			13.4437	9.13	4	4		0				0			657	73.2533	8.60205
Q8IWA5	Choline transporter-like protein 2 OS=Homo sapiens OX=9606 GN=SLC44A2 PE=1 SV=3 - [CTL2_HUMAN]	3.68	1	2	2	4	4.52072e+06	4.07475e+06	12354179	2.86844e+06	0	6.70711e+06	3.76141e+06		0			8.03686	3.68	2	2		0			7.08423	3.68	2	2		0				0				0			706	80.0705	8.57275
P83916	Chromobox protein homolog 1 OS=Homo sapiens OX=9606 GN=CBX1 PE=1 SV=1 - [CBX1_HUMAN]	47.57	1	5	6	11	3.30183e+06	0	6.25733e+06	1.44924e+06	1.53394e+06	1.89934e+06	0	7.4832	28.11	3	3		0			19.9104	35.14	4	4	6.55965	12.43	2	2		0				0				0			185	21.4046	4.93213
Q13185	Chromobox protein homolog 3 OS=Homo sapiens OX=9606 GN=CBX3 PE=1 SV=4 - [CBX3_HUMAN]	52.46	1	6	7	21	7.11032e+06	2.4485e+06	9.54359e+06	1.35434e+06	1.82008e+06	2.73255e+06	0	21.2049	43.72	5	5	8.19751	21.31	3	3	25.4908	38.8	5	6		0			13.1366	22.4	3	3	16.4258	30.05	4	4					183	20.7984	5.32568
Q9P2D1	Chromodomain-helicase-DNA-binding protein 7 OS=Homo sapiens OX=9606 GN=CHD7 PE=1 SV=3 - [CHD7_HUMAN]	0.83	1	2	2	2	0	0	4.10867e+06	0	0	0	0		0				0			5.65954	0.83	2	2		0				0				0				0			2997	335.717	6.34131
O75390	Citrate synthase, mitochondrial OS=Homo sapiens OX=9606 GN=CS PE=1 SV=2 - [CISY_HUMAN]	19.53	1	6	6	12	5.01292e+06	5.72557e+06	2.02432e+07	5.57071e+06	1.27704e+07	6.37539e+06	0	6.87055	5.58	2	2		0			10.4884	15.24	4	4	7.48598	5.79	2	2	7.40063	5.36	2	2	6.21091	5.79	2	2					466	51.6795	8.32373
O60641	Clathrin coat assembly protein AP180 OS=Homo sapiens OX=9606 GN=SNAP91 PE=1 SV=2 - [AP180_HUMAN]	5.73	1	4	4	5	0	0	0	0	8.30102e+06	0	0		0				0				0				0			18.7396	5.73	4	5						0			907	92.444	4.85596
Q00610	Clathrin heavy chain 1 OS=Homo sapiens OX=9606 GN=CLTC PE=1 SV=5 - [CLH1_HUMAN]	42.15	1	55	55	268	3.11247e+07	1.62518e+07	1.12383e+08	2.77416e+07	5.18342e+07	1.67818e+07	0	147.149	27.04	31	38	104.733	21.97	26	30	222.442	35.16	43	60	156.427	25.43	31	40	239.159	34.15	44	64	128.411	26.39	31	36		0			1675	191.493	5.69385
P09497	Clathrin light chain B OS=Homo sapiens OX=9606 GN=CLTB PE=1 SV=1 - [CLCB_HUMAN]	18.34	1	4	4	5	0	0	8.85833e+06	0	6.11412e+06	0	0		0							2.25556	4.37	2	2					10.2806	18.34	3	3		0				0			229	25.1751	4.64014
Q16630	Cleavage and polyadenylation specificity factor subunit 6 OS=Homo sapiens OX=9606 GN=CPSF6 PE=1 SV=2 - [CPSF6_HUMAN]	9.8	1	3	3	4	1.30163e+06	0	0	0	0	0	0	15.4756	9.8	3	4		0				0				0				0				0				0			551	59.1734	7.15186
P10909	Clusterin OS=Homo sapiens OX=9606 GN=CLU PE=1 SV=1 - [CLUS_HUMAN]	35.41	1	16	16	93	2.86611e+07	2.69871e+07	2.10006e+08	1.10488e+08	4.07204e+07	1.63732e+07	4.72922e+07	28.8618	21.83	7	8	39.8292	24.05	8	10	67.0683	30.73	11	19	70.6184	29.62	13	22	34.9516	24.05	8	12	23.6968	16.93	6	6	51.4928	23.83	10	16	449	52.461	6.26514
Q14019	Coactosin-like protein OS=Homo sapiens OX=9606 GN=COTL1 PE=1 SV=3 - [COTL1_HUMAN]	30.28	1	2	2	10	2.50538e+07	2.6142e+07	4.17937e+07	1.75572e+07	2.56116e+07	2.1287e+07	176607	12.8345	30.28	2	3	16.7288	30.28	2	4		0			14.6417	30.28	2	3		0				0				0			142	15.935	5.66846
P00742	Coagulation factor X OS=Homo sapiens OX=9606 GN=F10 PE=1 SV=2 - [FA10_HUMAN]	6.76	1	2	2	13	317976	657558	4.83812e+06	1.52403e+06	424093	634128	0	6.8459	6.76	2	2		0			25.3546	6.76	2	6		0			10.5123	6.76	2	3	7.58897	6.76	2	2		0			488	54.6965	5.93506
P00748	Coagulation factor XII OS=Homo sapiens OX=9606 GN=F12 PE=1 SV=3 - [FA12_HUMAN]	11.54	1	4	4	5	0	0	0	0	0	0	1.29638e+07						0				0												0			19.3751	11.54	4	5	615	67.7479	7.73779
P00488	Coagulation factor XIII A chain OS=Homo sapiens OX=9606 GN=F13A1 PE=1 SV=4 - [F13A_HUMAN]	21.17	1	10	10	25	6.35374e+06	0	2.17754e+07	4.36564e+06	2.9348e+06	1.68479e+07	0	16.9021	10.25	5	5		0			31.0703	13.11	6	9		0			7.89763	4.37	2	2	29.6349	17.08	8	9		0			732	83.2146	6.0874
P05160	Coagulation factor XIII B chain OS=Homo sapiens OX=9606 GN=F13B PE=1 SV=3 - [F13B_HUMAN]	5.14	1	2	2	2	0	0	0	0	0	1.73281e+06	2486160		0				0				0												0			3.97055	5.14	2	2	661	75.4612	6.39209
P53621	Coatomer subunit alpha OS=Homo sapiens OX=9606 GN=COPA PE=1 SV=2 - [COPA_HUMAN]	16.42	1	14	14	26	4.42975e+06	0	1.41579e+07	2.84467e+06	253296	901849	0	11.1563	4.25	3	4		0			42.2922	14.46	12	13	15.7361	5.96	5	5		0			9.21447	3.92	3	4		0			1224	138.258	7.66455
P53618	Coatomer subunit beta OS=Homo sapiens OX=9606 GN=COPB1 PE=1 SV=3 - [COPB_HUMAN]	4.51	1	3	3	4	766690	0	5.21854e+06	548850	0	466290	0		0				0			12.968	4.51	3	4		0				0				0				0			953	107.074	6.04932
P35606	Coatomer subunit beta' OS=Homo sapiens OX=9606 GN=COPB2 PE=1 SV=2 - [COPB2_HUMAN]	23.07	1	13	13	24	3.54004e+06	0	1.9552e+07	2.75679e+06	0	3.47409e+06	0	13.3269	7.51	4	4		0			38.3439	18.43	10	10	8.20137	4.08	2	2		0			27.0243	12.58	7	8		0			906	102.422	5.2749
P48444	Coatomer subunit delta OS=Homo sapiens OX=9606 GN=ARCN1 PE=1 SV=1 - [COPD_HUMAN]	12.33	1	5	5	8	0	0	9.25434e+06	1.68118e+06	0	2.31626e+06	0		0				0			13.6519	9.78	4	4	6.65139	4.89	2	2		0			6.84261	4.89	2	2		0			511	57.1741	6.21436
O14579	Coatomer subunit epsilon OS=Homo sapiens OX=9606 GN=COPE PE=1 SV=3 - [COPE_HUMAN]	26.95	1	4	4	5	0	0	8.22595e+06	0	0	2.27008e+06	0		0				0			13.7115	20.45	3	3		0				0			7.66749	12.99	2	2		0			308	34.4603	5.12256
Q9Y678	Coatomer subunit gamma-1 OS=Homo sapiens OX=9606 GN=COPG1 PE=1 SV=1 - [COPG1_HUMAN]	12.13	1	8	8	11	1.06909e+06	0	6.28949e+06	1.59455e+06	0	308023	0	6.82482	3.32	2	2		0			22.6232	9.5	6	7	7.49643	3.2	2	2		0				0				0			874	97.6555	5.46533
P61923	Coatomer subunit zeta-1 OS=Homo sapiens OX=9606 GN=COPZ1 PE=1 SV=1 - [COPZ1_HUMAN]	18.64	1	2	2	3	5.1325e+06	0	0	0	0	2.06362e+06	0	10.1448	18.64	2	3		0																0							177	20.1855	4.80518
P23528	Cofilin-1 OS=Homo sapiens OX=9606 GN=CFL1 PE=1 SV=3 - [COF1_HUMAN]	62.65	1	8	11	142	1.34684e+08	8.02534e+07	1.60897e+08	7.38153e+07	9.22123e+07	3.19739e+07	1.49167e+07	115.837	60.84	10	30	113.842	62.65	11	26	69.8424	60.84	9	16	100.213	62.65	11	23	84.5703	60.84	10	21	58.5948	53.61	7	13	51.6179	60.84	8	13	166	18.4907	8.08936
Q9Y281	Cofilin-2 OS=Homo sapiens OX=9606 GN=CFL2 PE=1 SV=1 - [COF2_HUMAN]	45.78	1	3	6	40	6.44994e+07	4.52463e+07	1.48422e+08	4.63495e+07	5.50397e+07	2.31683e+07	8.78269e+06	34.2327	43.98	5	9	31.8555	39.16	5	7		0				0			34.6605	37.35	4	8		0			17.9549	37.35	4	4	166	18.7249	7.88428
Q16204	Coiled-coil domain-containing protein 6 OS=Homo sapiens OX=9606 GN=CCDC6 PE=1 SV=2 - [CCDC6_HUMAN]	7.59	1	2	2	2	2.76996e+06	1.50492e+06	4.81789e+06	0	0	0	0	11.0995	7.59	2	2		0				0				0				0				0				0			474	53.2578	7.34229
Q14011	Cold-inducible RNA-binding protein OS=Homo sapiens OX=9606 GN=CIRBP PE=1 SV=1 - [CIRBP_HUMAN]	31.98	1	3	3	6	6.49421e+06	2.53072e+06	0	0	1.55166e+06	0	0	16.1282	31.98	3	4	8.80478	19.77	2	2		0				0				0				0							172	18.6367	9.51025
P02452	Collagen alpha-1(I) chain OS=Homo sapiens OX=9606 GN=COL1A1 PE=1 SV=5 - [CO1A1_HUMAN]	10.18	1	10	10	24	2.73142e+06	0	3.03148e+07	0	2.28313e+07	1.55521e+07	0		0				0			34.5645	8.27	8	9	7.32777	1.98	2	2	21.6736	4.3	4	6	27.841	7.65	7	7		0			1464	138.857	5.79541
P02462	Collagen alpha-1(IV) chain OS=Homo sapiens OX=9606 GN=COL4A1 PE=1 SV=3 - [CO4A1_HUMAN]	5.09	1	6	6	16	3.98959e+06	655348	3.01208e+07	5.09118e+06	2.78342e+06	1.21973e+06	0	10.9852	1.86	2	3		0			38.2309	5.09	6	9	15.0576	2.76	3	4		0				0				0			1669	160.514	8.27979
P12109	Collagen alpha-1(VI) chain OS=Homo sapiens OX=9606 GN=COL6A1 PE=1 SV=3 - [CO6A1_HUMAN]	24.12	1	14	14	42	6.44591e+06	2.14993e+06	6.49737e+07	8.45837e+06	1.64314e+07	1.76244e+07	0	12.805	4.77	3	3		0			58.8275	22.08	13	19	12.3238	7.49	4	4	30.2394	13.42	8	9	27.1276	11.67	7	7		0			1028	108.462	5.42725
Q99715	Collagen alpha-1(XII) chain OS=Homo sapiens OX=9606 GN=COL12A1 PE=1 SV=2 - [COCA1_HUMAN]	36.53	1	75	75	134	3.09421e+06	0	1.97571e+07	0	0	4.91291e+07	0	6.507	1.21	2	2		0			56.8055	9.17	16	16		0				0			422.51	36.14	74	116		0			3063	332.941	5.52881
Q05707	Collagen alpha-1(XIV) chain OS=Homo sapiens OX=9606 GN=COL14A1 PE=1 SV=3 - [COEA1_HUMAN]	42.93	1	54	54	197	7.04898e+06	0	2.73489e+07	902788	1.40798e+07	1.19281e+08	0	38.8462	9.47	11	12		0			77.9107	16.2	17	21	9.38513	3.12	3	3	81.9058	17.93	21	23	537.864	40.87	53	138		0			1796	193.394	5.30029
P39059	Collagen alpha-1(XV) chain OS=Homo sapiens OX=9606 GN=COL15A1 PE=1 SV=2 - [COFA1_HUMAN]	3.03	1	3	3	6	0	0	6.24595e+06	0	0	3.20554e+06	0		0				0			10.8023	3.03	3	3		0				0			12.9343	3.03	3	3		0			1388	141.632	4.99561
P39060	Collagen alpha-1(XVIII) chain OS=Homo sapiens OX=9606 GN=COL18A1 PE=1 SV=5 - [COIA1_HUMAN]	11.23	1	12	12	40	8.20402e+06	1.93684e+06	3.69136e+07	6.28734e+06	7.17589e+06	1.09391e+07	0	19.7876	6.96	5	5	9.75289	3.25	3	3	31.0055	8.72	9	10	22.0073	7.58	6	6	18.7277	5.42	6	6	35.3653	8.67	8	10		0			1754	178.077	6.01123
P08123	Collagen alpha-2(I) chain OS=Homo sapiens OX=9606 GN=COL1A2 PE=1 SV=7 - [CO1A2_HUMAN]	8.13	1	7	7	21	3.56897e+06	0	3.67676e+07	2.80976e+06	2.02982e+07	6.33011e+06	0		0				0			37.1254	7.03	6	8	14.5358	2.71	3	3	35.7099	3.81	4	8	10.2862	3.15	2	2		0			1366	129.235	8.95361
P08572	Collagen alpha-2(IV) chain OS=Homo sapiens OX=9606 GN=COL4A2 PE=1 SV=4 - [CO4A2_HUMAN]	7.83	1	8	8	12	2.426e+06	0	2.10443e+07	3.40758e+06	1.90663e+06	0	0		0				0			36.1246	7.83	8	10	5.45454	1.34	2	2		0				0				0			1712	167.449	8.66064
P12110	Collagen alpha-2(VI) chain OS=Homo sapiens OX=9606 GN=COL6A2 PE=1 SV=4 - [CO6A2_HUMAN]	12.46	1	9	9	23	2.45205e+06	0	4.22202e+07	3.10413e+06	8.03432e+06	8.63729e+06	0		0				0			34.6471	10.3	7	9	6.88974	2.36	2	2	16.4506	4.12	3	4	33.8387	10.11	7	8		0			1019	108.512	6.21436
P12111	Collagen alpha-3(VI) chain OS=Homo sapiens OX=9606 GN=COL6A3 PE=1 SV=5 - [CO6A3_HUMAN]	31.82	1	70	70	229	5.77674e+06	0	6.35402e+07	4.46038e+06	1.32507e+07	8.58028e+07	0	32.73	5.85	12	12		0			268.391	23.8	49	70	45.9792	6.45	13	13	106.948	11.55	27	30	378.838	25.24	58	104		0			3177	343.457	6.68311
Q96CG8	Collagen triple helix repeat-containing protein 1 OS=Homo sapiens OX=9606 GN=CTHRC1 PE=1 SV=1 - [CTHR1_HUMAN]	11.11	1	2	2	2	0	0	0	0	4.3079e+06	0	0		0								0				0			8.21357	11.11	2	2		0				0			243	26.2071	7.98682
P02745	Complement C1q subcomponent subunit A OS=Homo sapiens OX=9606 GN=C1QA PE=1 SV=2 - [C1QA_HUMAN]	13.47	1	2	2	5	0	0	3.42734e+07	1.37681e+07	0	2.07412e+07	5.06212e+06		0							5.18769	13.47	2	2	8.18202	13.47	2	3		0				0				0			245	26.0002	9.11475
P02746	Complement C1q subcomponent subunit B OS=Homo sapiens OX=9606 GN=C1QB PE=1 SV=3 - [C1QB_HUMAN]	29.25	1	5	5	22	1.58774e+07	2.06431e+06	45620261	2.87781e+07	6.59777e+06	2.4849e+07	1.12809e+07	9.3896	11.46	2	3		0			20.1279	17	3	5	18.9429	25.69	4	4	12.0334	17	3	3	13.1744	17	3	3	16.2321	20.55	4	4	253	26.7045	8.63135
P02747	Complement C1q subcomponent subunit C OS=Homo sapiens OX=9606 GN=C1QC PE=1 SV=3 - [C1QC_HUMAN]	21.22	1	4	4	36	1.24359e+07	3.74306e+06	5.57689e+07	2.77935e+07	5.36216e+06	3.26538e+07	9.11318e+06	12.5106	17.55	3	3	12.0586	17.55	3	3	17.527	21.22	4	5	24.5936	21.22	4	6	12.3013	17.55	3	3	36.315	21.22	4	10	24.9661	21.22	4	6	245	25.7571	8.41162
P00736	Complement C1r subcomponent OS=Homo sapiens OX=9606 GN=C1R PE=1 SV=2 - [C1R_HUMAN]	25.53	1	11	11	23	5.88366e+06	2.04982e+06	1.25475e+07	6.51994e+06	0	3.7606e+06	1.83214e+06		0				0			15.7189	10.5	4	5	32.1086	21.13	9	9		0			10.2048	8.09	3	3	20.0765	13.33	5	6	705	80.0668	6.21436
P09871	Complement C1s subcomponent OS=Homo sapiens OX=9606 GN=C1S PE=1 SV=1 - [C1S_HUMAN]	22.67	1	8	8	27	5.1056e+06	3.4194e+06	2.91741e+07	1.23443e+07	0	4.54855e+06	4.42884e+06	18.43	12.94	5	5	6.15158	5.52	2	2	22.2267	17.59	6	6	25.4819	18.9	7	7		0			13.0481	9.3	3	3	15.9214	13.37	4	4	688	76.6348	4.95752
P06681	Complement C2 OS=Homo sapiens OX=9606 GN=C2 PE=1 SV=2 - [CO2_HUMAN]	9.84	1	4	4	5	0	0	0	0	0	966826	2.70243e+06		0				0				0				0				0				0			19.8376	9.84	4	5	752	83.2143	7.41553
P01024	Complement C3 OS=Homo sapiens OX=9606 GN=C3 PE=1 SV=2 - [CO3_HUMAN]	63.68	1	82	82	651	5.78107e+07	2.47233e+07	7.57351e+07	5.4922e+07	1.75138e+07	49417453	9.75495e+07	402.729	52.62	62	110	239.554	41.07	45	68	206.731	37.94	43	55	408.132	47.68	60	107	148.433	24.59	30	40	427.779	47.75	57	111	570.405	54.42	69	160	1663	187.03	6.40479
P0C0L4	Complement C4-A OS=Homo sapiens OX=9606 GN=C4A PE=1 SV=2 - [CO4A_HUMAN]	34.17	1	2	41	198	1.46136e+07	1.0811e+07	2.15818e+07	1.80512e+07	1.00622e+07	1.11962e+07	2.85931e+07		0			85.6296	17.78	18	23	34.59	6.42	7	9	149.663	26.03	29	39	91.2646	18.41	19	23	90.0478	15.94	18	25	211.98	29.19	35	57	1744	192.664	7.07861
P0C0L5	Complement C4-B OS=Homo sapiens OX=9606 GN=C4B PE=1 SV=2 - [CO4B_HUMAN]	34.23	1	2	41	197	1.46136e+07	1.0811e+07	2.44662e+07	1.84833e+07	1.09328e+07	1.11962e+07	2.85931e+07	92.2872	19.95	21	24	85.9398	17.83	18	23		0			149.187	26.09	29	39		0			90.0941	16	18	25	223.668	29.24	35	58	1744	192.631	7.26904
P01031	Complement C5 OS=Homo sapiens OX=9606 GN=C5 PE=1 SV=4 - [CO5_HUMAN]	14.8	1	18	18	35	3.23987e+06	1.16671e+06	7.10258e+06	6.0748e+06	0	2.25357e+06	3.43756e+06	5.96151	2.03	2	2		0			10.6998	3.04	3	3	31.7401	10.14	13	13		0			4.67286	2.21	2	2	50.3353	11.04	14	15	1676	188.186	6.52197
Q07021	Complement component 1 Q subcomponent-binding protein, mitochondrial OS=Homo sapiens OX=9606 GN=C1QBP PE=1 SV=1 - [C1QBP_HUMAN]	14.54	1	2	2	14	8.1755e+06	2.871e+06	5.20647e+07	3.65791e+06	1.35329e+07	0	0	17.297	14.54	2	3	12.968	14.54	2	3	26.7367	14.54	2	5		0			17.7918	14.54	2	3		0							282	31.3426	4.84326
P13671	Complement component C6 OS=Homo sapiens OX=9606 GN=C6 PE=1 SV=3 - [CO6_HUMAN]	15.31	1	9	9	23	1.36332e+06	460014	9.12737e+06	1.17777e+07	267022	748603	7.75923e+06		0				0			18.4118	5.46	3	4	35.678	14.13	8	10		0				0			38.4162	11.24	7	9	934	104.718	6.75635
P10643	Complement component C7 OS=Homo sapiens OX=9606 GN=C7 PE=1 SV=2 - [CO7_HUMAN]	17.79	1	8	8	12	3.40577e+06	2.32891e+06	1.28473e+07	6.75048e+06	0	4.99278e+06	0		0				0			20.3086	10.08	4	4	35.0116	15.54	7	8		0				0				0			843	93.4573	6.48096
P07357	Complement component C8 alpha chain OS=Homo sapiens OX=9606 GN=C8A PE=1 SV=2 - [CO8A_HUMAN]	20.72	1	7	7	20	1.53725e+06	1.14905e+06	8.38423e+06	5.80687e+06	0	3.74971e+06	1.3934e+06	15.8405	9.93	3	3	13.9268	6.85	2	2	20.8829	13.18	4	4	30.0074	18.49	6	6		0			13.9194	6.85	2	2	15.8997	9.93	3	3	584	65.121	6.46826
P07358	Complement component C8 beta chain OS=Homo sapiens OX=9606 GN=C8B PE=1 SV=3 - [CO8B_HUMAN]	21.49	1	8	8	15	0	679244	1.25326e+07	8.39018e+06	0	1.40828e+06	880893		0				0			12.2649	15.74	5	5	25.6374	19.63	7	7		0			11.973	6.77	3	3		0			591	67.0035	8.1333
P07360	Complement component C8 gamma chain OS=Homo sapiens OX=9606 GN=C8G PE=1 SV=3 - [CO8G_HUMAN]	34.65	1	5	5	16	4.26962e+06	0	1.52061e+07	7.88255e+06	0	2.87541e+06	3.0365e+06	12.1724	25.74	3	3		0			15.4809	24.26	4	4	14.7869	25.74	3	3		0			7.266	16.34	2	2	18.7607	34.16	4	4	202	22.2635	8.30908
P02748	Complement component C9 OS=Homo sapiens OX=9606 GN=C9 PE=1 SV=2 - [CO9_HUMAN]	38.82	1	18	18	75	1.08516e+07	8.5687e+06	9.47848e+07	4.37074e+07	6.05609e+06	4.7429e+06	2.69163e+06	29.8112	20.75	7	7	42.7027	18.25	6	9	109.337	35.06	15	25	97.7021	30.23	14	22	16.896	8.59	3	4	18.3717	13.42	4	5	8.21961	5.72	3	3	559	63.1327	5.59229
P08174	Complement decay-accelerating factor OS=Homo sapiens OX=9606 GN=CD55 PE=1 SV=4 - [DAF_HUMAN]	8.66	1	2	2	2	0	0	1.43428e+07	0	0	0	0		0				0			5.10802	8.66	2	2		0				0				0				0			381	41.3736	7.59131
P00751	Complement factor B OS=Homo sapiens OX=9606 GN=CFB PE=1 SV=2 - [CFAB_HUMAN]	34.95	1	21	21	74	1.43771e+07	5.07907e+06	4.19191e+06	9.27948e+06	3.01363e+06	1.13428e+07	4.5076e+07	43.4132	18.72	9	11	20.3189	9.16	4	5		0			37.5952	18.72	9	11	17.0585	9.42	4	4	31.9765	19.24	9	10	105.646	34.95	21	33	764	85.4785	7.06396
P08603	Complement factor H OS=Homo sapiens OX=9606 GN=CFH PE=1 SV=4 - [CFAH_HUMAN]	55.81	1	44	48	284	2.24208e+07	7.62849e+06	3.84917e+07	1.66558e+07	8.11041e+06	2.60976e+07	4.8196e+07	146.983	40.54	33	40	84.9984	28.59	22	23	99.0961	31.19	25	28	148.052	41.75	34	41	47.4602	16.9	13	13	198.184	43.22	34	49	345.145	49.55	44	90	1231	139.005	6.60986
Q03591	Complement factor H-related protein 1 OS=Homo sapiens OX=9606 GN=CFHR1 PE=1 SV=2 - [FHR1_HUMAN]	58.18	1	6	10	39	4.8767e+06	1.58897e+06	37432916	7.34386e+06	0	7.63784e+06	1.15851e+07	21.8646	24.55	6	6	14.8964	17.27	4	4	25.2998	36.97	7	7	28.3202	26.36	6	7		0			17.6132	21.82	5	5	35.8704	35.15	7	10	330	37.626	7.38623
P05156	Complement factor I OS=Homo sapiens OX=9606 GN=CFI PE=1 SV=2 - [CFAI_HUMAN]	23.33	1	9	9	15	2.17192e+06	0	0	0	0	1.63894e+06	1.0026e+07	8.70175	4.46	2	2		0				0				0				0				0			58.6645	23.33	9	13	583	65.7066	7.50342
Q9NZB2	Constitutive coactivator of PPAR-gamma-like protein 1 OS=Homo sapiens OX=9606 GN=FAM120A PE=1 SV=2 - [F120A_HUMAN]	3.13	1	2	2	4	623009	0	1.11476e+06	0	0	0	0	7.72952	3.13	2	2		0			8.15528	3.13	2	2		0				0				0				0			1118	121.811	8.88037
Q12860	Contactin-1 OS=Homo sapiens OX=9606 GN=CNTN1 PE=1 SV=1 - [CNTN1_HUMAN]	33.5	1	23	23	30	0	0	0	416885	3.09325e+07	0	2.36956e+06		0				0				0				0			108.029	33.5	23	30		0				0			1018	113.249	5.89697
P78357	Contactin-associated protein 1 OS=Homo sapiens OX=9606 GN=CNTNAP1 PE=1 SV=1 - [CNTP1_HUMAN]	5.42	1	5	5	5	0	0	0	0	6.88884e+06	0	0		0				0				0				0			18.8143	5.42	5	5		0				0			1384	156.167	7.04932
Q9BT78	COP9 signalosome complex subunit 4 OS=Homo sapiens OX=9606 GN=COPS4 PE=1 SV=1 - [CSN4_HUMAN]	15.27	1	4	4	4	2.54201e+06	0	0	0	2.17871e+06	0	0	12.966	15.27	4	4		0				0				0				0								0			406	46.2397	5.8335
Q99829	Copine-1 OS=Homo sapiens OX=9606 GN=CPNE1 PE=1 SV=1 - [CPNE1_HUMAN]	8.57	1	3	3	6	1.77053e+06	1.67144e+06	1.31492e+07	3.21035e+06	1.44148e+06	2.44105e+06	0		0				0			14.7635	8.57	3	4	5.52992	4.66	2	2		0				0				0			537	59.0215	5.8335
Q96FN4	Copine-2 OS=Homo sapiens OX=9606 GN=CPNE2 PE=1 SV=3 - [CPNE2_HUMAN]	7.85	1	2	3	6	0	1.62831e+06	8.3351e+06	6.35004e+06	1.48794e+07	3.61106e+06	0		0			8.65576	6.2	2	2		0				0				0				0				0			548	61.1506	6.07471
O75131	Copine-3 OS=Homo sapiens OX=9606 GN=CPNE3 PE=1 SV=1 - [CPNE3_HUMAN]	19.37	1	7	8	20	4.67993e+06	4.20784e+06	1.0143e+07	4.66853e+06	7.18555e+06	2.53388e+06	0	16.4334	14.71	6	6	14.0799	10.06	4	4	5.11361	4.66	2	2	12.3996	8.38	3	3	7.52923	5.96	3	3	5.84435	3.35	2	2					537	60.0921	5.84619
O95741	Copine-6 OS=Homo sapiens OX=9606 GN=CPNE6 PE=1 SV=3 - [CPNE6_HUMAN]	16.34	1	6	7	10	0	0	8.3351e+06	6.35004e+06	8.26489e+06	3.61106e+06	0		0				0				0				0			22.839	16.34	7	7		0				0			557	61.9517	5.51611
O75367	Core histone macro-H2A.1 OS=Homo sapiens OX=9606 GN=H2AFY PE=1 SV=4 - [H2AY_HUMAN]	34.68	1	6	8	36	1.9345e+07	9.81931e+06	2.65749e+07	8.95168e+06	1.52859e+07	1.35748e+07	0	29.3542	31.72	7	8	23.7194	24.73	5	6	17.0749	14.52	3	4	17.0377	22.31	4	5	19.3669	24.73	5	6	22.3916	30.11	7	7		0			372	39.5925	9.78857
Q9P0M6	Core histone macro-H2A.2 OS=Homo sapiens OX=9606 GN=H2AFY2 PE=1 SV=3 - [H2AW_HUMAN]	23.39	1	3	5	6	1.11552e+07	0	1.04208e+07	0	0	2.32409e+06	0	17.6026	23.39	5	5		0				0				0				0				0				0			372	40.0334	9.68604
P22528	Cornifin-B OS=Homo sapiens OX=9606 GN=SPRR1B PE=1 SV=2 - [SPR1B_HUMAN]	34.83	1	2	2	4	0	0	2.24375e+07	2.24104e+06	0	0	0		0							15.8376	34.83	2	4		0															89	9.88093	8.48486
Q9UBG3	Cornulin OS=Homo sapiens OX=9606 GN=CRNN PE=1 SV=1 - [CRNN_HUMAN]	11.52	1	2	2	2	0	0	6.33899e+06	734874	0	0	0		0				0			10.1796	11.52	2	2		0				0				0				0			495	53.5016	6.1001
P31146	Coronin-1A OS=Homo sapiens OX=9606 GN=CORO1A PE=1 SV=4 - [COR1A_HUMAN]	30.37	1	10	10	37	4.93836e+06	3.37763e+06	1.88353e+07	2.948e+06	7.67466e+06	9.81096e+06	0	20.3256	14.1	4	5	21.4454	15.4	4	5	22.0044	20.61	5	6	17.1439	15.62	4	4	34.8791	21.91	8	9	32.4444	15.62	5	8		0			461	50.9938	6.68311
Q9BR76	Coronin-1B OS=Homo sapiens OX=9606 GN=CORO1B PE=1 SV=1 - [COR1B_HUMAN]	27.81	1	6	6	10	2.92684e+06	2.01443e+06	1.07e+07	0	0	0	0	12.0595	18.81	3	3		0			20.3357	14.93	4	5	5.64783	10.22	2	2		0				0				0			489	54.2003	5.88428
Q9ULV4	Coronin-1C OS=Homo sapiens OX=9606 GN=CORO1C PE=1 SV=1 - [COR1C_HUMAN]	25.53	1	8	8	16	3.41437e+06	6.4073e+06	2.51455e+07	4.03997e+06	1.88477e+06	2.23954e+06	0		0			11.6124	10.97	4	4	21.8979	12.66	3	5	7.56326	7.59	2	2	6.58176	6.75	2	2	8.1886	9.07	3	3		0			474	53.2151	7.07861
P57737	Coronin-7 OS=Homo sapiens OX=9606 GN=CORO7 PE=1 SV=2 - [CORO7_HUMAN]	4.22	1	2	2	2	0	0	1.97926e+06	0	0	0	0		0				0			5.8561	4.22	2	2		0				0				0				0			925	100.542	5.79541
P08185	Corticosteroid-binding globulin OS=Homo sapiens OX=9606 GN=SERPINA6 PE=1 SV=1 - [CBG_HUMAN]	22.22	1	6	6	8	3.38523e+06	0	0	0	0	0	8.00388e+06		0												0								0			33.2163	22.22	6	8	405	45.1119	6.03662
P12277	Creatine kinase B-type OS=Homo sapiens OX=9606 GN=CKB PE=1 SV=1 - [KCRB_HUMAN]	63.25	1	17	17	172	4.72761e+07	1.03384e+08	5.5774e+07	5.01508e+07	1.87017e+08	1.52427e+06	3.64953e+07	77.3673	50.13	11	21	148.218	63.25	16	37	40.7768	40.68	9	10	82.1667	57.22	12	23	192.773	63.25	16	48	8.79369	7.61	2	2	110.366	63.25	16	31	381	42.6173	5.59229
P12532	Creatine kinase U-type, mitochondrial OS=Homo sapiens OX=9606 GN=CKMT1A PE=1 SV=1 - [KCRU_HUMAN]	32.37	1	8	8	18	0	0	3.0304e+07	4.00612e+06	2.16766e+07	0	0						0			16.9599	22.54	4	5	9.57953	19.42	3	3	33.3335	32.37	8	10		0							417	47.0072	8.33838
Q9UBG0	C-type mannose receptor 2 OS=Homo sapiens OX=9606 GN=MRC2 PE=1 SV=2 - [MRC2_HUMAN]	13.39	1	15	15	28	1.05375e+06	0	2.43731e+07	1.65406e+06	790303	5.96931e+06	0	8.37234	2.5	2	2		0			34.5818	9.87	10	11	13.1466	3.85	4	4		0			41.2654	10.07	10	11		0			1479	166.568	5.8335
Q86VP6	Cullin-associated NEDD8-dissociated protein 1 OS=Homo sapiens OX=9606 GN=CAND1 PE=1 SV=2 - [CAND1_HUMAN]	18.62	1	16	16	51	7.80447e+06	3.7081e+06	1.15486e+07	5.76284e+06	6.98425e+06	2.12611e+06	0	36.5091	11.22	10	12	30.1852	8.05	7	9	24.9544	7.32	6	7	40.4929	11.63	10	12	21.9021	10.73	9	9	6.95457	2.11	2	2		0			1230	136.289	5.78271
Q8TEY5	Cyclic AMP-responsive element-binding protein 3-like protein 4 OS=Homo sapiens OX=9606 GN=CREB3L4 PE=1 SV=1 - [CR3L4_HUMAN]	8.86	1	2	2	2	0	1.74101e+07	0	1.21401e+07	6.75095e+06	1.77096e+07	0		0				0				0			5.97462	8.86	2	2		0				0				0			395	43.4051	5.42725
P04080	Cystatin-B OS=Homo sapiens OX=9606 GN=CSTB PE=1 SV=2 - [CYTB_HUMAN]	45.92	1	3	3	38	1.29356e+08	6.0193e+07	2.96251e+08	9.34099e+07	2.46153e+07	4.63676e+07	3.79e+07	19.3165	45.92	3	7	17.4133	45.92	3	6	18.08	45.92	3	7	18.8936	45.92	3	6	18.1474	45.92	3	5	13.8983	45.92	3	5	4.03006	33.67	2	2	98	11.1326	7.56201
P01037	Cystatin-SN OS=Homo sapiens OX=9606 GN=CST1 PE=1 SV=3 - [CYTN_HUMAN]	47.52	1	5	5	11	0	0	3.54441e+07	6.03789e+06	0	0	1.0083e+06		0							22.5166	39.72	4	6	5.25991	36.88	3	3									4.95138	19.15	2	2	141	16.3773	7.21045
P21291	Cysteine and glycine-rich protein 1 OS=Homo sapiens OX=9606 GN=CSRP1 PE=1 SV=3 - [CSRP1_HUMAN]	64.77	1	10	10	46	3.69296e+07	3.55864e+07	2.68612e+07	1.39435e+07	8.94143e+07	1.33237e+07	1.14643e+07	23.9067	42.49	5	7	26.8705	42.49	5	8	9.16305	29.02	3	3	12.3777	36.79	4	4	56.7139	60.1	9	15	9.86926	30.05	4	4	13.3736	42.49	5	5	193	20.5538	8.57275
Q16527	Cysteine and glycine-rich protein 2 OS=Homo sapiens OX=9606 GN=CSRP2 PE=1 SV=3 - [CSRP2_HUMAN]	24.35	1	3	3	11	6.72713e+06	2.63497e+06	1.35487e+07	2.31371e+06	0	0	0	9.21165	24.35	3	3	8.93192	24.35	3	3	6.98861	24.35	3	3	3.54766	15.54	2	2		0				0				0			193	20.9399	8.6167
P52943	Cysteine-rich protein 2 OS=Homo sapiens OX=9606 GN=CRIP2 PE=1 SV=1 - [CRIP2_HUMAN]	32.21	1	3	3	11	1.81058e+07	1.75155e+07	1.12438e+07	5.12671e+06	1.50501e+07	2.38033e+06	0	12.4464	32.21	3	3	13.2675	32.21	3	3		0			10.2461	23.08	2	2	12.5386	32.21	3	3		0				0			208	22.478	8.71924
P32320	Cytidine deaminase OS=Homo sapiens OX=9606 GN=CDA PE=1 SV=2 - [CDD_HUMAN]	40.41	1	3	3	3	0	0	6.55142e+06	3.2806e+06	0	0	0									13.0494	40.41	3	3		0								0							146	16.1739	6.91748
Q53TN4	Cytochrome b reductase 1 OS=Homo sapiens OX=9606 GN=CYBRD1 PE=1 SV=1 - [CYBR1_HUMAN]	15.03	1	2	2	2	0	0	0	0	0	2.77621e+06	0		0				0				0				0				0			7.18694	15.03	2	2		0			286	31.6207	8.76318
P04839	Cytochrome b-245 heavy chain OS=Homo sapiens OX=9606 GN=CYBB PE=1 SV=2 - [CY24B_HUMAN]	10.88	1	4	4	7	1.58168e+06	0	1.01631e+07	1.20305e+06	2.37197e+06	3.78e+06	0		0				0			13.9468	9.12	3	3		0				0			15.9173	4.74	2	4		0			570	65.2936	8.63135
P00167	Cytochrome b5 OS=Homo sapiens OX=9606 GN=CYB5A PE=1 SV=2 - [CYB5_HUMAN]	42.54	1	4	4	7	6.37537e+06	3.14405e+06	1.62879e+07	3.81037e+06	8.49857e+06	9.36529e+06	0		0				0			6.34049	32.84	3	3		0				0			8.13933	42.54	4	4					134	15.3205	4.95752
O43169	Cytochrome b5 type B OS=Homo sapiens OX=9606 GN=CYB5B PE=1 SV=2 - [CYB5B_HUMAN]	31.51	1	2	2	13	1.10635e+07	1.46629e+07	2.97479e+07	5.1548e+06	9.49913e+06	4.82516e+06	0	14.0252	31.51	2	3		0			15.4881	31.51	2	3	9.55106	31.51	2	2	14.4897	31.51	2	3	9.96323	31.51	2	2		0			146	16.322	4.97021
P31930	Cytochrome b-c1 complex subunit 1, mitochondrial OS=Homo sapiens OX=9606 GN=UQCRC1 PE=1 SV=3 - [QCR1_HUMAN]	43.33	1	13	13	64	5.7021e+06	8.95337e+06	4.83608e+07	1.19212e+07	2.37585e+07	7.95535e+06	0	21.899	22.5	5	6	22.1003	27.08	7	8	49.601	39.17	11	14	32.5458	33.54	8	10	53.7977	39.79	11	16	30.0811	32.29	8	10		0			480	52.6124	6.3667
P22695	Cytochrome b-c1 complex subunit 2, mitochondrial OS=Homo sapiens OX=9606 GN=UQCRC2 PE=1 SV=3 - [QCR2_HUMAN]	40.4	1	13	13	40	3.53151e+06	5.2224e+06	3.02851e+07	9.69986e+06	1.23943e+07	8.57665e+06	0	10.4301	9.05	3	3	14.3373	16.34	5	5	22.2042	19.65	6	7	22.9043	23.18	7	7	28.4493	30.24	9	9	18.8822	28.48	9	9		0			453	48.4129	8.63135
P14927	Cytochrome b-c1 complex subunit 7 OS=Homo sapiens OX=9606 GN=UQCRB PE=1 SV=2 - [QCR7_HUMAN]	34.23	1	3	3	9	6.76861e+06	4080449	2.0784e+07	4.8277e+06	1.83902e+07	1.36016e+06	0		0				0			7.3849	20.72	2	2	7.07798	25.23	2	2	18.4965	34.23	3	5		0				0			111	13.522	8.77783
P47985	Cytochrome b-c1 complex subunit Rieske, mitochondrial OS=Homo sapiens OX=9606 GN=UQCRFS1 PE=1 SV=2 - [UCRI_HUMAN]	25.18	2	3	3	12	1.79222e+06	5.40365e+06	3.14348e+06	1.91373e+06	2.97424e+06	463841	0		0			18.2165	15.69	2	4		0			19.0068	17.15	2	4	20.2194	17.15	2	4		0				0			274	29.6494	8.32373
P99999	Cytochrome c OS=Homo sapiens OX=9606 GN=CYCS PE=1 SV=2 - [CYC_HUMAN]	41.9	1	5	5	30	5.38759e+06	8.60372e+06	3.41446e+07	7.51324e+06	2.70251e+07	4.85692e+06	722952	6.26642	23.81	2	2	9.93213	40.95	3	5	20.3112	41.9	4	8	8.84395	40.95	3	4	24.9363	41.9	5	8	4.08381	40.95	3	3		0			105	11.7411	9.56885
P00403	Cytochrome c oxidase subunit 2 OS=Homo sapiens OX=9606 GN=MT-CO2 PE=1 SV=1 - [COX2_HUMAN]	24.67	1	4	4	18	8.56635e+06	5.65058e+06	2.62982e+07	9.70577e+06	2.08939e+07	6.62866e+06	0	4.17449	8.81	2	2	4.55269	8.81	2	2	10.9391	20.26	3	3	8.33916	17.62	3	3	19.5943	24.67	4	6	6.41238	11.45	2	2		0			227	25.5482	4.81787
P13073	Cytochrome c oxidase subunit 4 isoform 1, mitochondrial OS=Homo sapiens OX=9606 GN=COX4I1 PE=1 SV=1 - [COX41_HUMAN]	43.2	1	8	8	34	7.8012e+06	7.15388e+06	32980407	1.19582e+07	3.73542e+07	7.37112e+06	0	11.2902	26.04	5	5	12.0756	20.12	4	4	22.0827	37.28	6	7	16.0913	29.59	4	5	31.1468	32.54	6	9	11.4413	26.04	4	4		0			169	19.564	9.51025
P20674	Cytochrome c oxidase subunit 5A, mitochondrial OS=Homo sapiens OX=9606 GN=COX5A PE=1 SV=2 - [COX5A_HUMAN]	27.33	1	4	4	15	5.77842e+06	5.23957e+06	3.25145e+07	0	1.82242e+07	5.33916e+06	0	7.75943	21.33	3	3	4.43491	21.33	2	2	9.84659	27.33	4	4		0			13.7521	26.67	3	4	4.07716	21.33	2	2					150	16.7517	6.78564
P10606	Cytochrome c oxidase subunit 5B, mitochondrial OS=Homo sapiens OX=9606 GN=COX5B PE=1 SV=2 - [COX5B_HUMAN]	24.03	1	2	2	2	2.41886e+06	1.73553e+06	6.46218e+06	0	7.06147e+06	0	0		0				0			7.48881	24.03	2	2		0				0								0			129	13.6869	8.80713
P14854	Cytochrome c oxidase subunit 6B1 OS=Homo sapiens OX=9606 GN=COX6B1 PE=1 SV=2 - [CX6B1_HUMAN]	45.35	1	3	3	10	6.16254e+06	4.23284e+06	1.77247e+07	1.5122e+06	1.12897e+07	4.32655e+06	0	10.1999	45.35	2	3	7.94623	45.35	2	2	6.79384	45.35	2	2		0			13.6201	34.88	2	3		0							86	10.1857	7.04932
P09669	Cytochrome c oxidase subunit 6C OS=Homo sapiens OX=9606 GN=COX6C PE=1 SV=2 - [COX6C_HUMAN]	17.33	1	2	2	2	3.05626e+06	0	1.48114e+07	3.58624e+06	5.52184e+06	0	0		0								0				0			4.61389	17.33	2	2		0				0			75	8.77569	10.3892
P14406	Cytochrome c oxidase subunit 7A2, mitochondrial OS=Homo sapiens OX=9606 GN=COX7A2 PE=1 SV=1 - [CX7A2_HUMAN]	27.71	1	2	2	4	9.50227e+06	5.14474e+06	3.21575e+07	7.8249e+06	1.4341e+07	0	0		0				0				0			7.28233	27.71	2	2	7.79125	27.71	2	2		0							83	9.39011	9.75928
O00483	Cytochrome c oxidase subunit NDUFA4 OS=Homo sapiens OX=9606 GN=NDUFA4 PE=1 SV=1 - [NDUA4_HUMAN]	37.04	1	3	3	6	0	0	2.05357e+07	4.73407e+06	1.69723e+07	0	0									6.8523	24.69	2	2	6.25631	27.16	2	2	6.47245	27.16	2	2									81	9.36391	9.37842
P08574	Cytochrome c1, heme protein, mitochondrial OS=Homo sapiens OX=9606 GN=CYC1 PE=1 SV=3 - [CY1_HUMAN]	16	1	3	3	16	1.56504e+07	2.71124e+06	4.68556e+07	8.87844e+06	1.71586e+07	7.32415e+06	0		0			5.79743	11.08	2	2	10.1502	12.31	2	3	8.19135	16	3	3	20.7555	16	3	5	6.24333	8.62	2	3		0			325	35.399	8.99756
P21399	Cytoplasmic aconitate hydratase OS=Homo sapiens OX=9606 GN=ACO1 PE=1 SV=3 - [ACOC_HUMAN]	13.27	1	6	6	8	2.6519e+06	1.21412e+06	8.49872e+06	2.92245e+06	0	1.51617e+06	0	10.0587	5.51	3	3	9.10595	8.44	3	3		0				0				0			6.06203	5.06	2	2		0			889	98.3366	6.68311
Q14204	Cytoplasmic dynein 1 heavy chain 1 OS=Homo sapiens OX=9606 GN=DYNC1H1 PE=1 SV=5 - [DYHC1_HUMAN]	19.85	1	63	63	166	1.0236e+07	7.88553e+06	1.59808e+07	7.03703e+06	1.04178e+07	2.76156e+06	0	112.572	11.97	34	35	90.1538	9.86	29	30	68.1104	6.82	23	23	102.867	10.01	30	31	139.159	11.88	37	41	21.4701	1.61	4	6		0			4646	532.072	6.40479
O14576	Cytoplasmic dynein 1 intermediate chain 1 OS=Homo sapiens OX=9606 GN=DYNC1I1 PE=1 SV=2 - [DC1I1_HUMAN]	4.03	1	2	2	2	0	0	0	0	429736	0	0		0				0				0							5.3779	4.03	2	2		0				0			645	72.9097	5.12256
Q13409	Cytoplasmic dynein 1 intermediate chain 2 OS=Homo sapiens OX=9606 GN=DYNC1I2 PE=1 SV=3 - [DC1I2_HUMAN]	16.93	1	6	6	24	6.96334e+06	4.0737e+06	7.28924e+06	2.12255e+06	4.09149e+06	2.87593e+06	0	18.2791	16.93	5	6	19.8201	16.93	5	5	19.3043	8.78	3	5	12.5312	8.78	3	3	9.20829	8.93	3	3	5.91603	5.17	2	2		0			638	71.4121	5.19873
O43237	Cytoplasmic dynein 1 light intermediate chain 2 OS=Homo sapiens OX=9606 GN=DYNC1LI2 PE=1 SV=1 - [DC1L2_HUMAN]	11.18	1	4	4	10	4.2613e+06	3.08552e+06	1.69114e+07	3.2213e+06	2.90266e+06	2.81651e+06	0	10.6252	8.54	3	3	8.19688	6.1	2	2		0			7.353	6.1	2	2	10.5741	8.74	3	3		0				0			492	54.0655	6.37939
Q7L576	Cytoplasmic FMR1-interacting protein 1 OS=Homo sapiens OX=9606 GN=CYFIP1 PE=1 SV=1 - [CYFP1_HUMAN]	9.26	1	10	10	20	3.38335e+06	1.82572e+06	4.62642e+06	2.00376e+06	5.52292e+06	1.41143e+06	0	5.41977	1.92	2	2	9.66078	3.67	3	3	5.42466	2.79	3	3	14.0339	4.87	5	5	13.7975	4.79	5	5	5.64547	2.08	2	2		0			1253	145.089	6.90283
Q07065	Cytoskeleton-associated protein 4 OS=Homo sapiens OX=9606 GN=CKAP4 PE=1 SV=2 - [CKAP4_HUMAN]	51.83	1	25	25	86	1.68038e+07	4.48938e+06	7.38441e+07	1.2163e+07	7.10508e+06	1.31629e+07	0	57.4947	35.71	15	15	21.8913	12.46	5	5	110.667	47.34	20	27	60.9291	38.37	16	18	32.3327	15.61	7	7	46.6871	32.06	14	14		0			602	65.9827	5.92236
P28838	Cytosol aminopeptidase OS=Homo sapiens OX=9606 GN=LAP3 PE=1 SV=3 - [AMPL_HUMAN]	56.07	1	22	22	94	1.45922e+07	1.16996e+07	2.11972e+07	8.80593e+06	9.62158e+06	1.0458e+07	2.09111e+06	60.472	41.81	14	17	89.0576	44.7	16	22	43.2678	31.6	11	12	47.5698	39.69	13	13	43.1598	35.65	12	12	54.4628	35.84	12	15	12.0356	8.09	3	3	519	56.1308	7.92822
O00154	Cytosolic acyl coenzyme A thioester hydrolase OS=Homo sapiens OX=9606 GN=ACOT7 PE=1 SV=3 - [BACH_HUMAN]	18.68	1	5	5	5	1.99772e+06	2.38056e+06	3.84198e+06	1.93356e+06	9.42687e+06	0	0		0				0				0				0			19.2891	18.68	5	5		0				0			380	41.7693	8.54346
Q96KP4	Cytosolic non-specific dipeptidase OS=Homo sapiens OX=9606 GN=CNDP2 PE=1 SV=2 - [CNDP2_HUMAN]	44.63	1	15	15	89	2.40271e+07	1.33765e+07	3.67878e+07	1.21593e+07	1.89323e+07	6.6609e+06	4.01296e+06	43.8701	34.11	11	13	48.2267	37.47	12	16	21.9478	16.84	6	7	48.1223	34.74	11	15	62.7787	37.47	13	18	37.6993	27.58	9	11	27.6964	23.79	9	9	475	52.8449	5.97314
P49902	Cytosolic purine 5'-nucleotidase OS=Homo sapiens OX=9606 GN=NT5C2 PE=1 SV=1 - [5NTC_HUMAN]	5.35	1	2	2	2	2676862	1.22802e+06	0	0	0	0	0	6.43453	5.35	2	2		0				0				0				0				0				0			561	64.9283	6.13818
O43175	D-3-phosphoglycerate dehydrogenase OS=Homo sapiens OX=9606 GN=PHGDH PE=1 SV=4 - [SERA_HUMAN]	39.4	1	15	15	53	8.76423e+06	6.24319e+06	6.98993e+06	6.45311e+06	1.94904e+07	0	2.78051e+06	45.307	27.77	10	12	34.93	24.58	8	9	15.8906	7.5	3	4	41.7687	30.96	11	11	30.8777	20.64	9	10		0			20.7894	17.64	6	7	533	56.6144	6.7124
Q96EP5	DAZ-associated protein 1 OS=Homo sapiens OX=9606 GN=DAZAP1 PE=1 SV=1 - [DAZP1_HUMAN]	11.55	1	3	3	4	2.78932e+06	0	1.05078e+07	0	0	0	0	9.42347	7.62	2	2		0			8.99688	7.86	2	2						0				0				0			407	43.3561	8.55811
P30046	D-dopachrome decarboxylase OS=Homo sapiens OX=9606 GN=DDT PE=1 SV=3 - [DOPD_HUMAN]	32.2	2	3	3	7	1.1906e+07	1.20304e+07	1.38511e+07	3.79264e+06	1.2873e+07	4.57594e+06	0	6.14323	22.88	2	2	7.37635	22.88	2	2		0				0			9.15101	32.2	3	3		0							118	12.7037	7.29834
P07585	Decorin OS=Homo sapiens OX=9606 GN=DCN PE=1 SV=1 - [PGS2_HUMAN]	27.3	1	8	8	28	0	0	6.78513e+07	508497	7.91383e+06	4.94891e+07	0	7.39099	9.75	2	2		0			31.9247	21.45	6	9		0			19.1941	16.43	4	5	37.4489	20.61	7	12		0			359	39.7218	8.54346
Q9Y394	Dehydrogenase/reductase SDR family member 7 OS=Homo sapiens OX=9606 GN=DHRS7 PE=1 SV=1 - [DHRS7_HUMAN]	23.01	1	4	4	10	1.1053e+06	1.7069e+06	5.25931e+06	0	0	2.3589e+06	0		0			12.7868	13.86	2	4	6.79388	16.52	3	3		0				0			7.64467	20.35	3	3		0			339	38.2741	8.32373
Q13011	Delta(3,5)-Delta(2,4)-dienoyl-CoA isomerase, mitochondrial OS=Homo sapiens OX=9606 GN=ECH1 PE=1 SV=2 - [ECH1_HUMAN]	22.26	1	5	5	18	6.65738e+06	4.02755e+06	1.13214e+07	4.23387e+06	2.90822e+06	5.03769e+06	0	6.83771	6.4	2	2	15.0822	13.11	3	5	15.4408	14.63	3	4	6.89359	7.93	2	2	11.7932	12.2	3	3	7.0158	6.4	2	2					328	35.7934	8.00146
P30038	Delta-1-pyrroline-5-carboxylate dehydrogenase, mitochondrial OS=Homo sapiens OX=9606 GN=ALDH4A1 PE=1 SV=3 - [AL4A1_HUMAN]	16.87	1	8	8	23	5.60378e+06	6.69816e+06	4.38656e+06	3.52949e+06	4.16663e+06	0	0	27.1508	14.92	6	7	34.5265	16.87	8	9	13.0245	6.04	2	3	6.69491	4.62	2	2	7.91754	5.51	2	2									563	61.6806	8.07471
P13716	Delta-aminolevulinic acid dehydratase OS=Homo sapiens OX=9606 GN=ALAD PE=1 SV=1 - [HEM2_HUMAN]	19.7	1	6	6	12	3.72724e+06	5.51784e+06	8.11874e+06	0	9.05224e+06	2.96696e+06	2.6187e+06		0			5.56792	10	2	2	5.67488	7.27	2	2		0			13.5979	10.91	4	4	2.73788	10	2	2	3.33259	9.09	2	2	330	36.2714	6.78564
O43583	Density-regulated protein OS=Homo sapiens OX=9606 GN=DENR PE=1 SV=2 - [DENR_HUMAN]	18.69	1	2	2	6	3.27062e+06	1.64034e+06	4.28685e+06	1.23581e+06	3.27675e+06	0	0	10.5024	18.69	2	3		0				0				0			8.18687	18.69	2	3		0							198	22.0781	5.30029
Q9Y3Z3	Deoxynucleoside triphosphate triphosphohydrolase SAMHD1 OS=Homo sapiens OX=9606 GN=SAMHD1 PE=1 SV=2 - [SAMH1_HUMAN]	30.19	1	13	13	29	8.86486e+06	9.9027e+06	1.61838e+07	1.88292e+07	0	8.61357e+06	0	9.28056	7.03	4	4	14.0651	8.15	4	4	44.6392	21.73	9	10	5.77808	3.35	2	2		0			31.4659	18.53	8	9		0			626	72.1548	7.13721
P81605	Dermcidin OS=Homo sapiens OX=9606 GN=DCD PE=1 SV=2 - [DCD_HUMAN]	22.73	1	3	3	3	0	0	7.94687e+06	0	0	0	0		0				0			8.84891	22.73	3	3		0				0				0							110	11.2768	6.53662
Q02487	Desmocollin-2 OS=Homo sapiens OX=9606 GN=DSC2 PE=1 SV=1 - [DSC2_HUMAN]	6.99	1	4	4	5	1.14313e+07	0	1.70642e+07	4.70161e+06	0	0	0	7.72314	5.33	3	3					5.76177	3.55	2	2		0				0				0				0			901	99.8987	5.33838
Q14126	Desmoglein-2 OS=Homo sapiens OX=9606 GN=DSG2 PE=1 SV=2 - [DSG2_HUMAN]	9.84	1	6	6	8	5.29031e+06	0	5.12039e+06	1.55711e+06	0	0	0	20.5847	9.84	6	6		0				0			7.71377	2.59	2	2		0				0				0			1118	122.218	5.23682
P32926	Desmoglein-3 OS=Homo sapiens OX=9606 GN=DSG3 PE=1 SV=2 - [DSG3_HUMAN]	5.21	1	3	3	4	4.55129e+06	0	4.66431e+07	2.03918e+06	0	0	0	7.75798	4	2	2		0			8.63706	3.4	2	2		0				0				0				0			999	107.465	4.99561
Q86SJ6	Desmoglein-4 OS=Homo sapiens OX=9606 GN=DSG4 PE=1 SV=1 - [DSG4_HUMAN]	4.33	1	3	3	4	0	0	5.21113e+06	2.93413e+06	0	0	0		0				0			6.40488	3.27	2	2	6.84487	2.88	2	2		0				0				0			1040	113.751	4.56396
P15924	Desmoplakin OS=Homo sapiens OX=9606 GN=DSP PE=1 SV=3 - [DESP_HUMAN]	10.14	1	19	19	31	6.80615e+06	1.21904e+06	3.16696e+07	5.60921e+06	0	0	2.96818e+06	12.0331	2.16	4	4		0			74.4814	9.33	17	19	34.2251	4.01	8	8		0				0				0			2871	331.569	6.81494
P60981	Destrin OS=Homo sapiens OX=9606 GN=DSTN PE=1 SV=3 - [DEST_HUMAN]	24.24	1	4	4	21	1.35446e+07	1.37936e+07	2.9787e+07	1.18297e+07	1.13838e+07	6.33346e+06	1.90365e+06	12.4214	17.58	2	3	15.7529	17.58	3	5	17.7807	17.58	3	5	12.4808	17.58	2	3	8.50659	21.21	3	3	7.37588	17.58	2	2		0			165	18.4935	7.85498
Q9UBT3	Dickkopf-related protein 4 OS=Homo sapiens OX=9606 GN=DKK4 PE=1 SV=1 - [DKK4_HUMAN]	14.73	1	3	3	4	0	0	1.28791e+07	3.84029e+06	0	0	0									7.71427	10.27	2	2	7.19143	9.82	2	2		0				0				0			224	24.8592	8.38232
P09622	Dihydrolipoyl dehydrogenase, mitochondrial OS=Homo sapiens OX=9606 GN=DLD PE=1 SV=2 - [DLDH_HUMAN]	23.58	1	7	7	25	6.26051e+06	4.46673e+06	1.38635e+07	2.91452e+06	1.13902e+07	2.75447e+06	0	18.5428	12.18	4	4	13.7787	9.63	3	3	22.1301	16.11	4	5	11.4737	8.45	3	3	30.2658	17.09	6	7	13.2724	9.63	3	3		0			509	54.143	7.85498
P10515	Dihydrolipoyllysine-residue acetyltransferase component of pyruvate dehydrogenase complex, mitochondrial OS=Homo sapiens OX=9606 GN=DLAT PE=1 SV=3 - [ODP2_HUMAN]	8.81	1	3	3	3	1.79753e+06	2.64853e+06	4.79536e+06	1.72393e+06	3.60404e+06	0	0		0				0				0				0			8.04507	8.81	3	3						0			647	68.9531	7.84033
P36957	Dihydrolipoyllysine-residue succinyltransferase component of 2-oxoglutarate dehydrogenase complex, mitochondrial OS=Homo sapiens OX=9606 GN=DLST PE=1 SV=4 - [ODO2_HUMAN]	10.15	1	4	4	8	0	0	1.42068e+07	3.3792e+06	5.33939e+06	2.49551e+06	0		0				0			12.2712	8.17	3	3	9.52207	4.64	2	3	5.56973	4.42	2	2		0				0			453	48.7245	8.95361
P09417	Dihydropteridine reductase OS=Homo sapiens OX=9606 GN=QDPR PE=1 SV=2 - [DHPR_HUMAN]	36.48	1	6	6	15	4.59904e+06	5.21666e+06	0	3.11173e+06	2.11206e+07	2.58701e+06	0	11.7856	11.89	2	3	13.6621	11.89	2	3		0			10.1264	16.39	3	3	25.091	36.48	6	6		0				0			244	25.773	7.37158
Q14194	Dihydropyrimidinase-related protein 1 OS=Homo sapiens OX=9606 GN=CRMP1 PE=1 SV=1 - [DPYL1_HUMAN]	54.02	1	15	17	53	8.10338e+07	7.74755e+07	2.26488e+07	4.35138e+07	1.23344e+08	1.24992e+07	2.09058e+07		0			43.7207	12.06	4	11		0			22.9071	9.97	4	6	89.439	54.02	17	25		0				0			572	62.1447	7.03467
Q16555	Dihydropyrimidinase-related protein 2 OS=Homo sapiens OX=9606 GN=DPYSL2 PE=1 SV=1 - [DPYL2_HUMAN]	77.1	1	26	29	295	1.18973e+08	1.98786e+08	2.99878e+07	1.01782e+08	2.34079e+08	1.48755e+07	3.1279e+07	198.093	68.18	24	51	283.454	76.92	28	73	34.5603	29.02	10	11	167.926	65.03	24	45	251.136	62.59	23	68	50.2743	35.49	12	14	125.161	53.67	20	33	572	62.2546	6.37939
Q14195	Dihydropyrimidinase-related protein 3 OS=Homo sapiens OX=9606 GN=DPYSL3 PE=1 SV=1 - [DPYL3_HUMAN]	68.42	1	21	23	174	8.24305e+07	9.69127e+07	3.67695e+07	5.20384e+07	7.68288e+07	1.80391e+07	1.9319e+07	150.511	60.7	22	38	191.252	58.42	21	46	41.5748	30.18	10	10	92.7752	50.88	16	24	102.659	43.33	15	24	58.4488	35.61	12	16	67.3642	31.23	11	16	570	61.9241	6.49365
O14531	Dihydropyrimidinase-related protein 4 OS=Homo sapiens OX=9606 GN=DPYSL4 PE=1 SV=2 - [DPYL4_HUMAN]	6.82	1	2	2	2	0	0	0	0	3.82285e+06	0	0		0				0				0				0			3.01052	6.82	2	2									572	61.8384	7.09326
Q9BPU6	Dihydropyrimidinase-related protein 5 OS=Homo sapiens OX=9606 GN=DPYSL5 PE=1 SV=1 - [DPYL5_HUMAN]	6.91	1	2	2	2	0	1.48677e+06	0	938096	6.00619e+06	0	0		0				0				0				0			3.02357	6.91	2	2		0				0			564	61.3822	7.1958
Q5IS50	Dipeptidyl aminopeptidase-like protein 6 OS=Pan troglodytes OX=9598 GN=DPP6 PE=2 SV=1 - [DPP6_PANTR]	8.59	2	4	4	4	0	0	0	0	6.27524e+06	0	0		0				0				0				0			12.8572	8.59	4	4		0				0			803	91.3539	6.32861
P53634	Dipeptidyl peptidase 1 OS=Homo sapiens OX=9606 GN=CTSC PE=1 SV=2 - [CATC_HUMAN]	14.25	1	4	4	5	2.56863e+06	0	1.02076e+07	0	0	5.01195e+06	0		0				0				0								0			22.4297	14.25	4	5		0			463	51.8203	6.99072
Q9UHL4	Dipeptidyl peptidase 2 OS=Homo sapiens OX=9606 GN=DPP7 PE=1 SV=3 - [DPP2_HUMAN]	6.1	1	2	2	2	0	0	0	2.75247e+06	0	1.85935e+06	0		0				0				0				0							7.7097	6.1	2	2		0			492	54.3072	6.31592
Q9NY33	Dipeptidyl peptidase 3 OS=Homo sapiens OX=9606 GN=DPP3 PE=1 SV=2 - [DPP3_HUMAN]	11.94	1	5	5	6	0	2.14653e+06	0	2.2144e+06	0	0	0		0			11.8321	7.19	3	3		0			10.766	7.46	3	3		0				0				0			737	82.5378	5.09717
P78352	Disks large homolog 4 OS=Homo sapiens OX=9606 GN=DLG4 PE=1 SV=3 - [DLG4_HUMAN]	5.39	1	2	2	2	0	0	0	0	6.44432e+06	0	0		0				0				0				0			5.89162	5.39	2	2		0				0			724	80.4458	5.88428
Q16531	DNA damage-binding protein 1 OS=Homo sapiens OX=9606 GN=DDB1 PE=1 SV=1 - [DDB1_HUMAN]	15.35	1	9	9	14	4.51213e+06	2.85936e+06	1.46015e+07	1.08917e+06	2.67322e+06	2.23874e+06	0	11.6099	9.56	5	6		0			14.2258	6.4	4	4		0			3.09991	3.6	2	2	3.71571	3.25	2	2		0			1140	126.887	5.26221
O00273	DNA fragmentation factor subunit alpha OS=Homo sapiens OX=9606 GN=DFFA PE=1 SV=1 - [DFFA_HUMAN]	9.97	1	2	2	2	2.26324e+06	0	0	0	0	0	0	7.01871	9.97	2	2		0				0				0				0											331	36.4995	4.79248
P27695	DNA-(apurinic or apyrimidinic site) lyase OS=Homo sapiens OX=9606 GN=APEX1 PE=1 SV=2 - [APEX1_HUMAN]	45.6	1	8	8	28	1.16386e+07	5.42365e+06	1.56263e+07	1.90052e+06	2.71112e+06	3.72563e+06	0	34.3696	28.93	5	9	19.2581	23.58	4	5	20.8885	34.91	6	7		0			9.54802	15.72	3	3	15.3037	23.58	4	4					318	35.5322	8.11865
P78527	DNA-dependent protein kinase catalytic subunit OS=Homo sapiens OX=9606 GN=PRKDC PE=1 SV=3 - [PRKDC_HUMAN]	6.3	1	18	18	25	6.50982e+06	2.07241e+06	5.54814e+06	2.28074e+06	0	1.78876e+06	0	59.6666	5.5	15	15		0			18.2002	1.53	5	5	17.2017	1.57	4	5		0				0				0			4128	468.788	7.12256
P31689	DnaJ homolog subfamily A member 1 OS=Homo sapiens OX=9606 GN=DNAJA1 PE=1 SV=2 - [DNJA1_HUMAN]	7.05	1	2	2	2	2.26922e+06	0	5.52956e+06	0	0	0	0		0				0			3.57123	7.05	2	2		0				0				0				0			397	44.8395	7.07861
P25685	DnaJ homolog subfamily B member 1 OS=Homo sapiens OX=9606 GN=DNAJB1 PE=1 SV=4 - [DNJB1_HUMAN]	16.18	1	3	4	5	4.87968e+06	0	0	1.53285e+06	0	0	0	14.7852	16.18	4	4		0				0				0				0				0				0			340	38.0204	8.63135
Q9UDY4	DnaJ homolog subfamily B member 4 OS=Homo sapiens OX=9606 GN=DNAJB4 PE=1 SV=1 - [DNJB4_HUMAN]	11.28	1	1	2	3	3.12441e+06	0	0	2.73236e+06	0	0	0		0				0				0			6.86495	11.28	2	2		0				0				0			337	37.7831	8.49951
Q9H3Z4	DnaJ homolog subfamily C member 5 OS=Homo sapiens OX=9606 GN=DNAJC5 PE=1 SV=1 - [DNJC5_HUMAN]	33.33	1	4	4	7	0	0	1.06751e+07	0	4.59772e+06	3.92429e+06	0		0								0							14.9502	33.33	4	7		0				0			198	22.1343	5.07178
P39656	Dolichyl-diphosphooligosaccharide--protein glycosyltransferase 48 kDa subunit OS=Homo sapiens OX=9606 GN=DDOST PE=1 SV=4 - [OST48_HUMAN]	36.4	1	8	8	19	2.79182e+06	281842	3.33807e+07	5.04954e+06	0	6.11902e+06	0	7.72528	8.55	2	2		0			29.2446	22.37	5	8	10.8713	13.38	4	4		0			14.2685	18.64	5	5		0			456	50.769	6.55127
P04843	Dolichyl-diphosphooligosaccharide--protein glycosyltransferase subunit 1 OS=Homo sapiens OX=9606 GN=RPN1 PE=1 SV=1 - [RPN1_HUMAN]	46.62	1	19	19	66	1.0347e+07	3.64262e+06	5.58473e+07	8.46474e+06	2.52606e+06	1.28896e+07	0	20.8354	17.46	7	7	24.926	17.3	7	8	59.7479	38.22	15	20	33.3564	28.83	11	11	20.9209	14.83	6	6	43.8148	28.5	12	14		0			607	68.5268	6.37939
P04844	Dolichyl-diphosphooligosaccharide--protein glycosyltransferase subunit 2 OS=Homo sapiens OX=9606 GN=RPN2 PE=1 SV=3 - [RPN2_HUMAN]	41.36	1	15	15	58	8.08924e+06	1.77947e+06	3.81431e+07	8.87863e+06	3.19802e+06	1.44823e+07	0	34.0444	18.38	6	9		0			59.319	35.82	12	18	41.4422	25.52	10	12	6.59484	6.02	2	2	65.9477	25.67	11	17					631	69.241	5.69385
P46977	Dolichyl-diphosphooligosaccharide--protein glycosyltransferase subunit STT3A OS=Homo sapiens OX=9606 GN=STT3A PE=1 SV=2 - [STT3A_HUMAN]	4.82	1	3	3	4	0	0	1.32839e+07	0	0	3.20646e+06	0		0				0			5.72496	2.98	2	2		0				0			6.88618	3.55	2	2		0			705	80.4768	8.07471
Q8TCJ2	Dolichyl-diphosphooligosaccharide--protein glycosyltransferase subunit STT3B OS=Homo sapiens OX=9606 GN=STT3B PE=1 SV=1 - [STT3B_HUMAN]	6.54	1	4	4	6	0	0	1.49104e+07	2.02225e+06	0	2.88799e+06	0		0				0			10.6367	6.54	4	4		0				0			7.9592	3.27	2	2		0			826	93.6137	8.90967
P55265	Double-stranded RNA-specific adenosine deaminase OS=Homo sapiens OX=9606 GN=ADAR PE=1 SV=4 - [DSRAD_HUMAN]	3.26	1	2	2	2	0	0	4.79172e+06	0	0	0	0		0				0			10.1548	3.26	2	2		0				0				0				0			1226	135.981	8.646
Q16643	Drebrin OS=Homo sapiens OX=9606 GN=DBN1 PE=1 SV=4 - [DREB_HUMAN]	19.72	1	8	8	22	5.37262e+06	3.58129e+06	2.21657e+07	5.41696e+06	7.81774e+06	0	923799	14.5568	11.56	4	4	10.5053	8.78	3	3	18.8908	14.33	6	6	5.9219	5.55	2	2	18.8802	11.09	5	5		0			6.0157	5.55	2	2	649	71.3854	4.44971
Q9UJU6	Drebrin-like protein OS=Homo sapiens OX=9606 GN=DBNL PE=1 SV=1 - [DBNL_HUMAN]	34.88	1	10	10	23	6.3806e+06	2.86434e+06	1.02804e+07	2.78846e+06	2.21108e+06	2.59624e+06	0	30.0756	24.42	7	7	15.7801	11.86	4	4	18.0513	13.26	4	4	13.8981	11.86	4	4	7.15995	5.81	2	2	7.19422	5.58	2	2		0			430	48.1776	5.04639
Q02750	Dual specificity mitogen-activated protein kinase kinase 1 OS=Homo sapiens OX=9606 GN=MAP2K1 PE=1 SV=2 - [MP2K1_HUMAN]	12.21	1	2	3	6	995343	789509	1428092	0	3.35751e+06	0	0		0				0				0				0			12.9314	12.21	3	4						0			393	43.4113	6.62451
P36507	Dual specificity mitogen-activated protein kinase kinase 2 OS=Homo sapiens OX=9606 GN=MAP2K2 PE=1 SV=1 - [MP2K2_HUMAN]	12	1	2	3	7	1.2595e+06	671639	1428092	1.08487e+06	1.67257e+06	0	0	9.8598	9	2	2	8.41881	9	2	2		0				0				0				0							400	44.3961	6.55127
Q14203	Dynactin subunit 1 OS=Homo sapiens OX=9606 GN=DCTN1 PE=1 SV=3 - [DCTN1_HUMAN]	8.22	1	7	7	8	2.0423e+06	1.66059e+06	9.13192e+06	1.76779e+06	2.32838e+06	0	0		0			4.27706	2.9	2	2	7.94281	3.6	3	3		0			10.8949	2.66	3	3		0				0			1278	141.607	5.80811
Q13561	Dynactin subunit 2 OS=Homo sapiens OX=9606 GN=DCTN2 PE=1 SV=4 - [DCTN2_HUMAN]	28.68	1	7	7	18	4.07306e+06	2.48775e+06	1.41235e+07	2.12906e+06	4.92085e+06	2.03304e+06	0	16.9833	18.95	4	4	11.0123	8.48	2	2	21.0639	19.45	5	5		0			22.1789	18.2	5	5	10.5838	8.73	2	2		0			401	44.2039	5.21143
Q05193	Dynamin-1 OS=Homo sapiens OX=9606 GN=DNM1 PE=1 SV=2 - [DYN1_HUMAN]	34.95	1	23	24	24	0	0	0	0	1.68419e+07	0	0		0				0				0				0			85.6574	34.26	23	23		0				0			864	97.347	7.1665
O00429	Dynamin-1-like protein OS=Homo sapiens OX=9606 GN=DNM1L PE=1 SV=2 - [DNM1L_HUMAN]	12.09	1	6	6	6	1.52566e+06	0	0	1.07957e+06	3.53337e+06	0	0	3.146	5.3	2	2		0				0				0			13.6234	6.79	4	4		0				0			736	81.8261	6.81494
P50570	Dynamin-2 OS=Homo sapiens OX=9606 GN=DNM2 PE=1 SV=2 - [DYN2_HUMAN]	5.29	1	2	4	4	1.25635e+06	1.80887e+06	0	0	1.50288e+07	1.26264e+06	0	4.15523	4.14	2	2		0				0				0				0				0				0			870	98.0032	7.44482
Q9UQ16	Dynamin-3 OS=Homo sapiens OX=9606 GN=DNM3 PE=1 SV=4 - [DYN3_HUMAN]	5.41	1	2	4	4	1.25635e+06	1.80887e+06	0	0	7.16922e+06	0	0	4.15523	4.14	2	2		0				0				0				0				0				0			869	97.685	8.35303
O60313	Dynamin-like 120 kDa protein, mitochondrial OS=Homo sapiens OX=9606 GN=OPA1 PE=1 SV=3 - [OPA1_HUMAN]	12.4	1	8	8	10	1.35468e+06	0	7.04988e+06	0	3.44146e+06	0	0		0				0			12.9744	8.13	5	5		0			14.405	6.98	5	5		0				0			960	111.561	7.86963
P63167	Dynein light chain 1, cytoplasmic OS=Homo sapiens OX=9606 GN=DYNLL1 PE=1 SV=1 - [DYL1_HUMAN]	49.44	1	2	3	14	1.36459e+07	7.27933e+06	3.92419e+07	8.19789e+06	2.29106e+07	9948145	2.69084e+06	12.4809	49.44	3	4	11.0985	37.08	2	2	12.229	49.44	3	4		0				0			6.49257	37.08	2	2		0			89	10.3591	7.40088
Q96FJ2	Dynein light chain 2, cytoplasmic OS=Homo sapiens OX=9606 GN=DYNLL2 PE=1 SV=1 - [DYL2_HUMAN]	49.44	1	2	3	11	1.35397e+07	6.4576e+06	4.39212e+07	3.41348e+06	2.24306e+07	7.66659e+06	2.69084e+06		0				0				0				0			10.6191	37.08	2	3		0				0			89	10.3431	7.37158
Q9NP97	Dynein light chain roadblock-type 1 OS=Homo sapiens OX=9606 GN=DYNLRB1 PE=1 SV=3 - [DLRB1_HUMAN]	34.38	1	2	2	6	9.78542e+06	6.48418e+06	2.52112e+07	5.48634e+06	9.43069e+06	1.43371e+06	0	5.85082	34.38	2	2	5.74547	34.38	2	2		0				0			6.42164	34.38	2	2		0							96	10.9147	7.25439
P63172	Dynein light chain Tctex-type 1 OS=Homo sapiens OX=9606 GN=DYNLT1 PE=1 SV=1 - [DYLT1_HUMAN]	30.09	1	2	2	2	2.00191e+06	1.37753e+06	3.39992e+06	0	0	504049	0	5.59095	30.09	2	2		0				0												0							113	12.444	5.08447
Q9Y4J8	Dystrobrevin alpha OS=Homo sapiens OX=9606 GN=DTNA PE=1 SV=2 - [DTNA_HUMAN]	8.88	1	5	5	8	633876	2.72899e+06	0	213088	1.79225e+06	0	0		0			11.972	8.88	4	4		0				0			14.6492	5.52	4	4		0				0			743	83.8479	6.88818
Q14118	Dystroglycan OS=Homo sapiens OX=9606 GN=DAG1 PE=1 SV=2 - [DAG1_HUMAN]	7.04	1	3	3	4	0	0	0	0	4.65918e+06	3.066e+06	1.31207e+06		0				0				0				0			14.5913	7.04	3	4		0				0			895	97.3807	8.55811
Q14258	E3 ubiquitin/ISG15 ligase TRIM25 OS=Homo sapiens OX=9606 GN=TRIM25 PE=1 SV=2 - [TRI25_HUMAN]	4.76	1	2	2	2	0	0	4.24689e+06	0	0	0	0						0			9.33778	4.76	2	2		0				0				0				0			630	70.9277	8.08936
Q15075	Early endosome antigen 1 OS=Homo sapiens OX=9606 GN=EEA1 PE=1 SV=2 - [EEA1_HUMAN]	6.66	1	7	7	9	1.45718e+06	1.38121e+06	4.58905e+06	444168	633319	586790	0		0			22.0703	4.75	5	6	13.2956	3.05	3	3		0				0				0				0			1411	162.367	5.68115
Q9HC35	Echinoderm microtubule-associated protein-like 4 OS=Homo sapiens OX=9606 GN=EML4 PE=1 SV=3 - [EMAL4_HUMAN]	1.94	1	2	2	2	1.96345e+06	0	7.62164e+06	1.73198e+06	1.02985e+06	1.45218e+06	0		0				0				0				0				0			6.02278	1.94	2	2		0			981	108.848	6.40479
P49961	Ectonucleoside triphosphate diphosphohydrolase 1 OS=Homo sapiens OX=9606 GN=ENTPD1 PE=1 SV=1 - [ENTP1_HUMAN]	9.22	1	3	3	5	0	0	1.02587e+07	1.27539e+06	0	4.73419e+06	0		0				0			5.95138	6.47	2	2		0				0			8.50625	6.67	2	3		0			510	57.9271	6.34131
Q9Y5L3	Ectonucleoside triphosphate diphosphohydrolase 2 OS=Homo sapiens OX=9606 GN=ENTPD2 PE=1 SV=1 - [ENTP2_HUMAN]	11.52	1	4	4	9	0	0	0	0	6.29638e+06	0	3.1586e+06		0				0											21.1943	11.52	4	5		0			17.5952	11.52	4	4	495	53.6312	8.26514
P22413	Ectonucleotide pyrophosphatase/phosphodiesterase family member 1 OS=Homo sapiens OX=9606 GN=ENPP1 PE=1 SV=2 - [ENPP1_HUMAN]	3.24	1	2	2	2	0	0	3.94599e+06	0	0	2.14032e+06	0		0				0				0				0				0			10.1721	3.24	2	2		0			925	104.857	7.13721
Q6UWR7	Ectonucleotide pyrophosphatase/phosphodiesterase family member 6 OS=Homo sapiens OX=9606 GN=ENPP6 PE=1 SV=2 - [ENPP6_HUMAN]	40.91	1	15	15	41	0	0	1.92388e+06	0	5.70965e+06	3.23862e+07	0		0				0			12.5314	14.09	3	3					26.3079	24.77	7	7	103.442	40.91	15	31		0			440	50.2084	7.98682
Q9BUP0	EF-hand domain-containing protein D1 OS=Homo sapiens OX=9606 GN=EFHD1 PE=1 SV=1 - [EFHD1_HUMAN]	19.25	1	4	4	4	1.15403e+06	0	5.50532e+06	0	1.75064e+06	874340	0		0				0			9.84079	15.06	3	3		0				0				0				0			239	26.9108	5.38916
Q96C19	EF-hand domain-containing protein D2 OS=Homo sapiens OX=9606 GN=EFHD2 PE=1 SV=1 - [EFHD2_HUMAN]	13.75	1	3	3	3	1.15403e+06	0	0	0	1.75064e+06	874340	0		0				0				0				0			6.0075	9.17	2	2		0				0			240	26.6805	5.19873
Q12805	EGF-containing fibulin-like extracellular matrix protein 1 OS=Homo sapiens OX=9606 GN=EFEMP1 PE=1 SV=2 - [FBLN3_HUMAN]	44.42	1	16	16	39	7.09631e+06	0	1.97772e+07	4.10094e+06	0	5.75478e+07	1.35901e+06	11.7895	13.39	3	3		0			17.9068	23.73	6	6		0				0			116.896	44.42	16	28	3.67251	7.3	2	2	493	54.6042	5.07178
O95967	EGF-containing fibulin-like extracellular matrix protein 2 OS=Homo sapiens OX=9606 GN=EFEMP2 PE=1 SV=3 - [FBLN4_HUMAN]	23.93	1	6	6	8	4.13702e+06	0	1.1259e+07	0	0	1.18754e+07	0		0				0			8.17038	6.09	2	2		0				0			21.7547	23.93	6	6					443	49.3723	4.94482
Q9H4M9	EH domain-containing protein 1 OS=Homo sapiens OX=9606 GN=EHD1 PE=1 SV=2 - [EHD1_HUMAN]	4.49	1	2	2	2	0	2.71959e+06	5.53304e+06	0	0	2.60257e+06	0		0				0			5.40805	4.49	2	2		0				0				0							534	60.5887	6.82959
Q9NZN4	EH domain-containing protein 2 OS=Homo sapiens OX=9606 GN=EHD2 PE=1 SV=2 - [EHD2_HUMAN]	26.52	1	8	8	16	2.6752e+06	1.76428e+06	4.79044e+06	838707	2.22084e+06	5.61264e+06	0	7.05456	7.55	2	2	5.91962	7.55	2	2		0				0			2.42025	7.37	2	2	34.0232	26.52	8	10		0			543	61.1227	6.45557
Q9H223	EH domain-containing protein 4 OS=Homo sapiens OX=9606 GN=EHD4 PE=1 SV=1 - [EHD4_HUMAN]	7.76	1	3	3	3	1.58716e+06	1.46136e+06	0	1.95383e+06	0	1.99893e+06	0		0				0				0				0				0			9.35943	7.76	3	3		0			541	61.1365	6.75635
Q15717	ELAV-like protein 1 OS=Homo sapiens OX=9606 GN=ELAVL1 PE=1 SV=2 - [ELAV1_HUMAN]	23.01	1	5	5	10	9.37197e+06	2.0333e+06	1.00247e+07	3.33698e+06	3.95817e+06	2.50022e+06	0	9.26686	19.02	4	5		0			8.05394	8.59	2	2	10.0066	10.12	3	3		0				0				0			326	36.0692	9.17334
Q9Y6R1	Electrogenic sodium bicarbonate cotransporter 1 OS=Homo sapiens OX=9606 GN=SLC4A4 PE=1 SV=1 - [S4A4_HUMAN]	2.78	1	2	2	2	3.2701e+06	0	0	0	254220	0	0		0				0				0				0			4.91891	2.78	2	2		0				0			1079	121.383	6.80029
P13804	Electron transfer flavoprotein subunit alpha, mitochondrial OS=Homo sapiens OX=9606 GN=ETFA PE=1 SV=1 - [ETFA_HUMAN]	42.04	1	9	9	38	6.78074e+06	5.03547e+06	1.17157e+07	4.91263e+06	5.72343e+06	1.88891e+06	0	36.4247	38.44	8	9	19.8579	22.52	5	6	16.7757	24.02	5	5	29.8289	34.53	7	8	25.9867	26.73	6	7	12.0023	8.71	2	3					333	35.0576	8.38232
P38117	Electron transfer flavoprotein subunit beta OS=Homo sapiens OX=9606 GN=ETFB PE=1 SV=3 - [ETFB_HUMAN]	16.86	1	3	3	5	8.49817e+06	3.42718e+06	1.62791e+07	5.00689e+06	6.92027e+06	3.76876e+06	0	6.71495	10.2	2	2	8.02866	16.86	3	3		0				0				0				0				0			255	27.8262	8.104
P68104	Elongation factor 1-alpha 1 OS=Homo sapiens OX=9606 GN=EEF1A1 PE=1 SV=1 - [EF1A1_HUMAN]	43.72	2	11	15	188	1.4876e+08	9.77247e+07	2.78987e+08	9.19381e+07	5.31747e+07	5.61335e+07	1.2396e+07	109.644	39.61	12	37	101.535	39.39	12	33	153.061	41.34	14	43	93.8771	33.33	11	31	61.6056	30.3	9	19	55.4815	25.32	9	20	18.5895	12.77	4	5	462	50.1091	9.01221
Q05639	Elongation factor 1-alpha 2 OS=Homo sapiens OX=9606 GN=EEF1A2 PE=1 SV=1 - [EF1A2_HUMAN]	47.08	1	7	11	104	8.57055e+07	5.10852e+07	1.94954e+08	5.98877e+07	3.19427e+07	3.28656e+07	7.60844e+06		0				0				0				0			42.8397	36.29	8	12		0				0			463	50.4383	9.02686
P24534	Elongation factor 1-beta OS=Homo sapiens OX=9606 GN=EEF1B2 PE=1 SV=3 - [EF1B_HUMAN]	34.67	1	4	4	18	1.12448e+07	5.0543e+06	3.10997e+07	5.21146e+06	7.2607e+06	7.6281e+06	0	12.3067	34.67	4	4	9.68707	12.44	2	2	17.4709	20.44	3	4	11.0594	13.78	2	3	12.1166	20.44	3	3	9.90352	12.44	2	2					225	24.7483	4.66553
P29692	Elongation factor 1-delta OS=Homo sapiens OX=9606 GN=EEF1D PE=1 SV=5 - [EF1D_HUMAN]	31.32	1	6	6	25	1.68877e+07	7.21745e+06	4.08904e+07	8.70935e+06	5.43798e+06	5.85173e+06	1.12962e+06	20.7034	26.69	5	7	9.29087	12.81	2	3	21.8824	31.32	6	7	9.8968	17.44	3	3	6.43248	12.81	2	2	10.503	18.15	3	3		0			281	31.1028	5.0083
P26641	Elongation factor 1-gamma OS=Homo sapiens OX=9606 GN=EEF1G PE=1 SV=3 - [EF1G_HUMAN]	27.69	1	9	9	41	1.51362e+07	4.68702e+06	4.20464e+07	8.76421e+06	4.7555e+06	7.93534e+06	0	22.5135	19.22	6	7	17.77	16.02	5	5	31.6925	27.69	9	11	24.148	21.51	7	8	12.3953	10.53	3	3	21.7354	19.22	6	7		0			437	50.0871	6.66846
P13639	Elongation factor 2 OS=Homo sapiens OX=9606 GN=EEF2 PE=1 SV=4 - [EF2_HUMAN]	42.77	1	29	30	142	2.79876e+07	1.06933e+07	6.05378e+07	1.47669e+07	6.55592e+06	8.6949e+06	0	108.721	30.07	21	29	68.0812	23.19	15	18	117.461	33.8	22	36	104.374	31.35	20	28	34.6038	16.67	9	9	84.1426	20.51	16	22		0			858	95.277	6.82959
P49411	Elongation factor Tu, mitochondrial OS=Homo sapiens OX=9606 GN=TUFM PE=1 SV=2 - [EFTU_HUMAN]	47.12	1	14	14	56	1.40533e+07	5.15282e+06	3.3186e+07	1.86417e+07	1.00633e+07	4.55261e+06	0	29.4622	29.87	9	10	29.1992	25.22	7	7	46.0891	29.2	9	13	35.6327	26.11	8	11	30.086	30.31	8	9	20.1151	19.03	6	6		0			452	49.5102	7.60596
Q15370	Elongin-B OS=Homo sapiens OX=9606 GN=ELOB PE=1 SV=1 - [ELOB_HUMAN]	31.36	1	2	2	2	0	0	0	2.11318e+06	3.46029e+06	0	0		0								0				0			7.94862	31.36	2	2									118	13.1246	4.88135
P50402	Emerin OS=Homo sapiens OX=9606 GN=EMD PE=1 SV=1 - [EMD_HUMAN]	10.63	1	2	2	2	1.89436e+06	0	5.8718e+06	1.34755e+06	0	0	0	7.4845	10.63	2	2						0				0				0								0			254	28.9759	5.50342
Q9Y6C2	EMILIN-1 OS=Homo sapiens OX=9606 GN=EMILIN1 PE=1 SV=3 - [EMIL1_HUMAN]	5.71	1	3	3	5	619313	0	4.52358e+06	599715	3.0656e+06	3.24653e+06	0		0				0			8.1294	3.74	2	3		0				0			8.28442	3.44	2	2		0			1016	106.63	5.17334
Q9NRM1	Enamelin OS=Homo sapiens OX=9606 GN=ENAM PE=1 SV=3 - [ENAM_HUMAN]	17.25	1	14	14	21	0	0	1.64007e+07	2.86001e+07	0	0	0		0				0			4.68301	1.84	2	2	56.8863	16.46	13	19		0				0				0			1142	128.705	6.82959
P17813	Endoglin OS=Homo sapiens OX=9606 GN=ENG PE=1 SV=2 - [EGLN_HUMAN]	16.26	1	7	7	8	0	0	1.02735e+07	0	0	2.94848e+06	0						0			7.18729	3.95	2	2									20.9004	12.31	5	6		0			658	70.5331	6.60986
O94919	Endonuclease domain-containing 1 protein OS=Homo sapiens OX=9606 GN=ENDOD1 PE=1 SV=2 - [ENDD1_HUMAN]	21	1	7	7	23	5.0563e+06	6.52495e+06	3.69447e+07	6.50068e+06	7.33387e+06	3.80456e+06	0	11.4747	9.4	3	3	13.4449	9.8	3	3	26.9292	16.2	6	7	9.66629	7.2	2	2	20.4067	16.8	5	5	13.49	9.8	3	3					500	54.9813	5.70654
Q99962	Endophilin-A1 OS=Homo sapiens OX=9606 GN=SH3GL2 PE=1 SV=1 - [SH3G2_HUMAN]	31.53	1	8	9	18	3.73296e+06	2.78351e+06	0	1.99686e+06	1.51831e+07	0	1.47807e+06		0			3.98436	13.07	3	3		0				0			37.6442	31.53	9	11		0			10.0712	13.07	3	3	352	39.9371	5.45264
Q99961	Endophilin-A2 OS=Homo sapiens OX=9606 GN=SH3GL1 PE=1 SV=1 - [SH3G1_HUMAN]	8.97	1	1	2	4	2.86913e+06	3293284	0	1.99686e+06	13691357	0	0	6.91341	8.97	2	2		0				0				0				0				0				0			368	41.464	5.42725
Q9NR46	Endophilin-B2 OS=Homo sapiens OX=9606 GN=SH3GLB2 PE=1 SV=1 - [SHLB2_HUMAN]	13.67	1	3	3	3	816105	0	0	0	3.25097e+06	0	0		0				0								0			11.0261	13.67	3	3		0				0			395	43.9466	5.98584
Q9NZ08	Endoplasmic reticulum aminopeptidase 1 OS=Homo sapiens OX=9606 GN=ERAP1 PE=1 SV=3 - [ERAP1_HUMAN]	11.69	1	8	8	13	2.71889e+06	0	4.0237e+06	3.22094e+06	0	1.88582e+06	0	5.93168	2.87	2	2		0			7.28327	4.68	3	3		0				0			20.3103	10.31	7	8		0			941	107.166	6.45557
P11021	Endoplasmic reticulum chaperone BiP OS=Homo sapiens OX=9606 GN=HSPA5 PE=1 SV=2 - [BIP_HUMAN]	50	1	28	30	251	1.04735e+08	5.01759e+07	2.13895e+08	7.23782e+07	5.42046e+07	5.39585e+07	9.4542e+06	167.153	43.73	23	42	117.617	36.54	20	30	185.376	43.12	26	48	165.755	42.81	24	42	97.4004	29.66	16	25	192.08	45.87	27	51	44.0214	21.71	11	13	654	72.2884	5.16064
Q7Z2K6	Endoplasmic reticulum metallopeptidase 1 OS=Homo sapiens OX=9606 GN=ERMP1 PE=1 SV=2 - [ERMP1_HUMAN]	2.43	1	2	2	2	0	0	4.89759e+06	0	0	0	0		0				0			6.08903	2.43	2	2		0				0				0				0			904	100.167	7.51807
P30040	Endoplasmic reticulum resident protein 29 OS=Homo sapiens OX=9606 GN=ERP29 PE=1 SV=4 - [ERP29_HUMAN]	39.08	1	7	7	27	9.21147e+06	4.04512e+06	2.62898e+07	7.49683e+06	5.59198e+06	1.11906e+07	0	25.0102	29.12	5	7	9.93863	15.71	3	4	16.514	18.77	3	4	12.952	18.01	4	4	17.0323	23.75	5	5	14.9364	11.49	2	3		0			261	28.9752	7.31299
Q9BS26	Endoplasmic reticulum resident protein 44 OS=Homo sapiens OX=9606 GN=ERP44 PE=1 SV=1 - [ERP44_HUMAN]	25.62	1	7	7	15	7.18844e+06	4.96708e+06	2.97038e+07	5.20729e+06	1.67166e+06	4.78515e+06	0		0				0			15.8614	21.67	6	6	16.5309	16.01	4	4	6.43358	6.4	2	2	9.14016	12.56	3	3					406	46.9414	5.26221
Q969X5	Endoplasmic reticulum-Golgi intermediate compartment protein 1 OS=Homo sapiens OX=9606 GN=ERGIC1 PE=1 SV=1 - [ERGI1_HUMAN]	13.1	1	2	2	2	5.84903e+06	3.79324e+06	7.94894e+06	3.76195e+06	0	4.59225e+06	0		0				0				0				0				0			5.00184	13.1	2	2					290	32.5715	7.06396
P14625	Endoplasmin OS=Homo sapiens OX=9606 GN=HSP90B1 PE=1 SV=1 - [ENPL_HUMAN]	50.44	1	34	36	218	5.25297e+07	1.81744e+07	1.33656e+08	3.90033e+07	2.34096e+07	3.12707e+07	3.26949e+06	127.563	36.11	25	41	58.9849	30.14	22	25	150.892	42.96	29	49	110.123	36.49	24	37	76.0204	37.73	23	24	116.315	37.86	25	36	21.8701	11.46	6	6	803	92.4113	4.84326
P84090	Enhancer of rudimentary homolog OS=Homo sapiens OX=9606 GN=ERH PE=1 SV=1 - [ERH_HUMAN]	30.77	1	2	2	8	2.38852e+07	3.76341e+06	1.18123e+07	2.59972e+06	7.07282e+06	4.81263e+06	0	8.71728	30.77	2	2	8.33855	30.77	2	2	9.89167	30.77	2	2		0			8.05416	30.77	2	2		0				0			104	12.251	5.92236
Q9UHY7	Enolase-phosphatase E1 OS=Homo sapiens OX=9606 GN=ENOPH1 PE=1 SV=1 - [ENOPH_HUMAN]	20.69	1	3	3	5	0	2.75459e+06	0	0	3.43306e+06	0	0		0			6.55626	16.09	2	2		0				0			15.0274	12.26	2	3									261	28.9145	4.77979
P30084	Enoyl-CoA hydratase, mitochondrial OS=Homo sapiens OX=9606 GN=ECHS1 PE=1 SV=4 - [ECHM_HUMAN]	41.03	1	8	8	47	4.60906e+06	3.23434e+06	1.13204e+07	3.59362e+06	3.55483e+06	1.23798e+06	0	41.1962	24.14	4	9	32.0531	21.38	4	7	50.9277	25.52	5	11	34.7063	33.45	6	9	34.0611	27.59	6	8	11.2063	16.9	3	3		0			290	31.3671	8.07471
P00533	Epidermal growth factor receptor OS=Homo sapiens OX=9606 GN=EGFR PE=1 SV=2 - [EGFR_HUMAN]	2.81	1	2	2	2	461131	91323.9	5.24967e+06	347822	0	189620	0		0				0			7.50512	2.81	2	2		0				0				0				0			1210	134.19	6.68311
P58107	Epiplakin OS=Homo sapiens OX=9606 GN=EPPK1 PE=1 SV=2 - [EPIPL_HUMAN]	29.98	1	19	24	52	6.39674e+06	7.70361e+06	5.13414e+07	1.17881e+07	1.2127e+07	4.60776e+06	1.57909e+06		0				0			108.595	29.61	23	30		0				0				0				0			5090	555.279	5.60498
P16422	Epithelial cell adhesion molecule OS=Homo sapiens OX=9606 GN=EPCAM PE=1 SV=2 - [EPCAM_HUMAN]	21.97	1	4	4	13	4.47842e+06	2.07914e+06	1.09119e+07	3.62552e+06	0	0	0	19.1133	21.97	4	4	12.9428	16.56	3	3	13.2445	11.46	2	3	14.5744	16.56	3	3						0				0			314	34.9097	7.45947
P07099	Epoxide hydrolase 1 OS=Homo sapiens OX=9606 GN=EPHX1 PE=1 SV=1 - [HYEP_HUMAN]	50.33	1	18	18	73	9.822e+06	1.24052e+07	5.97629e+07	9.86232e+06	1.76049e+07	3.08111e+07	0	13.0707	26.37	5	5	15.4448	36.04	8	8	40.7531	38.46	11	16	20.2108	27.03	8	10	24.7739	27.69	8	12	50.3257	45.71	14	22		0			455	52.915	7.25439
Q15006	ER membrane protein complex subunit 2 OS=Homo sapiens OX=9606 GN=EMC2 PE=1 SV=1 - [EMC2_HUMAN]	10.44	1	2	2	2	0	0	3.38529e+06	949778	0	621924	0		0								0				0				0			7.09378	10.44	2	2		0			297	34.8114	6.56592
O94905	Erlin-2 OS=Homo sapiens OX=9606 GN=ERLIN2 PE=1 SV=1 - [ERLN2_HUMAN]	35.99	1	9	9	18	9.81613e+06	2.7671e+06	1.86391e+07	2.70303e+06	4.9359e+06	2.79068e+06	0	20.7375	22.42	5	5		0			8.39737	7.08	2	2	11.6332	15.93	3	3	18.4956	18.88	5	5	10.6719	11.5	3	3		0			339	37.8155	5.61768
Q8TAM6	Ermin OS=Homo sapiens OX=9606 GN=ERMN PE=2 SV=1 - [ERMIN_HUMAN]	9.51	1	2	2	2	0	0	0	0	6.37875e+06	0	0		0				0				0				0			8.27259	9.51	2	2		0				0			284	32.7628	4.84326
Q96HE7	ERO1-like protein alpha OS=Homo sapiens OX=9606 GN=ERO1A PE=1 SV=2 - [ERO1A_HUMAN]	36.97	1	10	10	18	1.789e+06	921087	2.27474e+07	5.30649e+06	0	2.99816e+06	0	7.87628	6.62	2	2		0			34.7611	34.4	9	9	25.4288	17.95	6	7		0				0				0			468	54.3581	5.68115
P27105	Erythrocyte band 7 integral membrane protein OS=Homo sapiens OX=9606 GN=STOM PE=1 SV=3 - [STOM_HUMAN]	36.11	1	6	6	30	2.34747e+06	1.92715e+06	8.00426e+06	6.26967e+06	7.79237e+06	5.96359e+06	0	13.5832	17.71	3	3	17.2252	17.71	3	4	27.5013	24.65	4	6	25.7751	21.88	4	6	23.4164	29.17	5	5	30.5542	17.71	3	6					288	31.7107	7.88428
P16452	Erythrocyte membrane protein band 4.2 OS=Homo sapiens OX=9606 GN=EPB42 PE=1 SV=3 - [EPB42_HUMAN]	10.85	1	5	5	10	662018	1.09076e+06	0	1.05616e+06	2.40078e+06	2.46116e+06	0		0			9.27227	3.91	2	2		0			11.4076	6.95	3	3	8.0303	3.91	2	2	11.9167	5.79	3	3		0			691	76.9607	8.08936
P30042	ES1 protein homolog, mitochondrial OS=Homo sapiens OX=9606 GN=C21orf33 PE=1 SV=3 - [ES1_HUMAN]	38.81	1	5	5	10	1.7652e+07	6.86092e+06	2.49197e+07	6.93558e+06	1.21075e+07	1.11829e+07	1.92773e+06		0			10.1984	26.87	3	3	3.37611	19.03	2	2	5.00931	17.16	2	2	7.75244	21.27	3	3		0				0			268	28.1527	8.26514
Q9H0W9	Ester hydrolase C11orf54 OS=Homo sapiens OX=9606 GN=C11orf54 PE=1 SV=1 - [CK054_HUMAN]	12.06	1	2	2	2	2.71633e+06	1.84598e+06	0	1.27918e+06	0	0	0	8.90674	12.06	2	2		0								0								0				0			315	35.0946	6.69775
P60842	Eukaryotic initiation factor 4A-I OS=Homo sapiens OX=9606 GN=EIF4A1 PE=1 SV=1 - [IF4A1_HUMAN]	39.9	1	7	11	42	2.32285e+07	8.84601e+06	3.42212e+07	1.48391e+07	1.14597e+07	9.0458e+06	1.44592e+06	35.1698	28.08	8	9	22.5159	22.17	6	6	22.6588	18.72	6	6	35.2189	33.74	9	9		0			22.3971	19.95	6	6	4.69783	7.39	2	2	406	46.1246	5.47803
Q14240	Eukaryotic initiation factor 4A-II OS=Homo sapiens OX=9606 GN=EIF4A2 PE=1 SV=2 - [IF4A2_HUMAN]	29.24	1	4	8	33	2.32285e+07	8.84601e+06	3.24232e+07	1.48391e+07	1.14597e+07	9.0458e+06	1.44592e+06	30.2173	23.59	7	8		0				0			27.2796	25.8	7	8	18.5021	20.15	6	6		0			4.69783	7.37	2	2	407	46.3728	5.47803
P05198	Eukaryotic translation initiation factor 2 subunit 1 OS=Homo sapiens OX=9606 GN=EIF2S1 PE=1 SV=3 - [IF2A_HUMAN]	11.75	1	3	3	5	2.07596e+06	0	0	2.21894e+06	0	2.03517e+06	0		0				0				0			8.61359	8.57	2	2		0			10.2353	11.75	3	3					315	36.0894	5.08447
P41091	Eukaryotic translation initiation factor 2 subunit 3 OS=Homo sapiens OX=9606 GN=EIF2S3 PE=1 SV=3 - [IF2G_HUMAN]	23.09	1	6	6	11	2.82071e+06	1.59077e+06	1.17618e+07	2.8707e+06	2.33275e+06	3.37064e+06	0	12.738	14.83	4	4		0			2.19347	5.72	2	2	7.31168	11.23	3	3	2.44098	8.26	2	2		0				0			472	51.0772	8.39697
Q14152	Eukaryotic translation initiation factor 3 subunit A OS=Homo sapiens OX=9606 GN=EIF3A PE=1 SV=1 - [EIF3A_HUMAN]	9.26	1	8	8	17	3.9883e+06	2.28434e+06	6900145	1.11725e+06	2.2399e+06	2.18365e+06	0	20.7446	6.58	6	6	7.64281	2.17	2	2	12.1263	4.63	4	4	6.13845	1.95	2	2		0			8.6267	3.4	3	3		0			1382	166.468	6.78564
P55884	Eukaryotic translation initiation factor 3 subunit B OS=Homo sapiens OX=9606 GN=EIF3B PE=1 SV=3 - [EIF3B_HUMAN]	4.79	1	3	3	3	2.8178e+06	0	54721793	0	0	0	0		0				0			9.86789	4.79	3	3		0				0				0				0			814	92.4238	4.99561
P60228	Eukaryotic translation initiation factor 3 subunit E OS=Homo sapiens OX=9606 GN=EIF3E PE=1 SV=1 - [EIF3E_HUMAN]	13.48	1	4	4	4	2.84746e+06	0	6.17335e+06	0	0	0	0		0				0			10.8612	13.48	4	4		0				0				0				0			445	52.1874	6.03662
Q13347	Eukaryotic translation initiation factor 3 subunit I OS=Homo sapiens OX=9606 GN=EIF3I PE=1 SV=1 - [EIF3I_HUMAN]	19.08	1	2	2	2	4.33282e+06	0	1.44867e+07	0	0	0	0		0				0			6.66169	19.08	2	2						0				0				0			325	36.4786	5.64307
Q9Y262	Eukaryotic translation initiation factor 3 subunit L OS=Homo sapiens OX=9606 GN=EIF3L PE=1 SV=1 - [EIF3L_HUMAN]	10.46	1	4	4	4	2.53017e+06	0	5.87919e+06	0	0	0	0		0				0			19.205	10.46	4	4		0								0				0			564	66.6844	6.34131
Q04637	Eukaryotic translation initiation factor 4 gamma 1 OS=Homo sapiens OX=9606 GN=EIF4G1 PE=1 SV=4 - [IF4G1_HUMAN]	1.69	1	2	2	2	2.91674e+06	0	3.54759e+06	0	0	0	0		0				0			6.27548	1.69	2	2		0				0				0				0			1599	175.382	5.32568
P55010	Eukaryotic translation initiation factor 5 OS=Homo sapiens OX=9606 GN=EIF5 PE=1 SV=2 - [IF5_HUMAN]	7.89	1	2	2	2	6351108	0	1.30046e+07	1.05393e+06	4.89012e+06	2.94308e+06	0		0				0				0			7.10016	7.89	2	2		0				0				0			431	49.1918	5.57959
P63241	Eukaryotic translation initiation factor 5A-1 OS=Homo sapiens OX=9606 GN=EIF5A PE=1 SV=2 - [IF5A1_HUMAN]	46.1	3	8	8	37	2.52387e+07	9.23376e+06	2.38756e+07	7.41234e+06	8.16639e+06	7.7401e+06	0	27.4437	46.1	7	9	16.6509	31.17	5	5	29.7036	38.31	5	7	18.1389	31.17	4	5	19.9996	31.17	4	6	16.4051	23.38	4	5		0			154	16.8214	5.23682
P56537	Eukaryotic translation initiation factor 6 OS=Homo sapiens OX=9606 GN=EIF6 PE=1 SV=1 - [IF6_HUMAN]	38.78	1	5	5	15	5.72225e+06	1.91193e+06	1.10732e+07	2.33743e+06	0	0	0	23.6194	28.57	4	5	8.1621	17.14	2	2	16.328	27.35	3	4	17.9181	33.06	4	4		0								0			245	26.5822	4.67822
P43003	Excitatory amino acid transporter 1 OS=Homo sapiens OX=9606 GN=SLC1A3 PE=1 SV=1 - [EAA1_HUMAN]	17.53	1	8	8	38	3.77024e+06	9.50141e+06	0	7.87486e+06	6.5935e+07	0	1.47034e+07		0			13.7298	7.93	3	5					13.9187	7.93	3	4	76.2461	17.53	8	20		0			34.4142	12.36	5	9	542	59.5337	8.41162
P43004	Excitatory amino acid transporter 2 OS=Homo sapiens OX=9606 GN=SLC1A2 PE=1 SV=2 - [EAA2_HUMAN]	24.74	1	12	12	44	2.82384e+06	6.1027e+06	0	3.61664e+06	4.95845e+07	0	555010	8.72482	4.7	3	3	31.2173	14.11	6	9					7.78697	4.7	2	3	97.9271	24.74	12	29		0				0			574	62.0638	6.53662
O14980	Exportin-1 OS=Homo sapiens OX=9606 GN=XPO1 PE=1 SV=1 - [XPO1_HUMAN]	4.58	1	3	3	6	329263	0	2.83283e+06	1.96904e+06	0	0	0	14.7668	2.8	2	4		0				0			7.27905	2.89	2	2		0				0				0			1071	123.306	6.06201
P55060	Exportin-2 OS=Homo sapiens OX=9606 GN=CSE1L PE=1 SV=3 - [XPO2_HUMAN]	4.94	1	3	3	4	3.11192e+06	0	3.15242e+07	0	1.9851e+07	319244	0	8.42411	3.5	2	2		0			4.51559	3.19	2	2		0				0				0				0			971	110.346	5.77002
Q9BSJ8	Extended synaptotagmin-1 OS=Homo sapiens OX=9606 GN=ESYT1 PE=1 SV=1 - [ESYT1_HUMAN]	21.01	1	14	14	35	2.78474e+06	1.64902e+06	2.00696e+07	2.05816e+06	0	2.53025e+06	0	18.6921	6.07	4	5		0			64.4453	17.39	12	18	25.5278	7.25	5	7		0			16.3429	5.89	4	5		0			1104	122.78	5.8335
Q16610	Extracellular matrix protein 1 OS=Homo sapiens OX=9606 GN=ECM1 PE=1 SV=2 - [ECM1_HUMAN]	22.04	1	6	6	6	0	0	4.74256e+06	3.21056e+06	0	0	2.58929e+06		0				0			11.498	11.48	3	3		0				0				0			7.46394	10.56	3	3	540	60.6353	6.7124
P08294	Extracellular superoxide dismutase [Cu-Zn] OS=Homo sapiens OX=9606 GN=SOD3 PE=1 SV=2 - [SODE_HUMAN]	23.33	1	4	4	5	0	0	0	0	1.51352e+06	7.68635e+06	0		0								0				0				0			20.4053	23.33	4	5		0			240	25.8347	6.60986
P15311	Ezrin OS=Homo sapiens OX=9606 GN=EZR PE=1 SV=4 - [EZRI_HUMAN]	29.69	1	10	15	75	4.32932e+07	3.47067e+07	6.16491e+07	2.19053e+07	3.54807e+07	1.59789e+07	7.66168e+06	64.6767	26.62	11	19	35.4433	15.19	7	12	39.8803	18.94	9	13	27.5163	12.12	6	9	47.927	20.31	10	14		0				0			586	69.3697	6.26514
P52907	F-actin-capping protein subunit alpha-1 OS=Homo sapiens OX=9606 GN=CAPZA1 PE=1 SV=3 - [CAZA1_HUMAN]	52.45	1	7	9	41	2.49475e+07	9.0396e+06	6.04226e+07	2.03271e+07	1.21233e+07	1.25125e+07	1.64197e+06	36.6717	36.71	6	8	6.38568	15.73	3	3	30.4501	33.92	6	7	50.2689	42.66	7	11	17.6666	27.62	5	5	23.0887	30.42	5	7		0			286	32.9023	5.69385
P47755	F-actin-capping protein subunit alpha-2 OS=Homo sapiens OX=9606 GN=CAPZA2 PE=1 SV=3 - [CAZA2_HUMAN]	47.9	1	6	8	37	1.85932e+07	1.46348e+07	4.30332e+07	1.62435e+07	1.58642e+07	1.11373e+07	1.31287e+06	30.2031	34.97	6	8	28.2596	37.41	6	6	15.8681	21.33	4	4	32.7348	42.66	7	9	22.7424	29.72	5	6	17.7983	22.03	4	4		0			286	32.9286	5.84619
P47756	F-actin-capping protein subunit beta OS=Homo sapiens OX=9606 GN=CAPZB PE=1 SV=4 - [CAPZB_HUMAN]	38.63	1	10	10	46	2.58662e+07	1.41339e+07	5.10702e+07	1.40248e+07	1.22522e+07	1.72394e+07	4.17655e+06	28.5348	29.96	5	7	36.0863	33.57	6	9	36.7393	31.41	7	9	21.6474	28.16	5	5	21.4544	29.6	6	6	39.363	33.57	7	10		0			277	31.3308	5.59229
Q96AE4	Far upstream element-binding protein 1 OS=Homo sapiens OX=9606 GN=FUBP1 PE=1 SV=3 - [FUBP1_HUMAN]	10.25	1	4	4	4	5.82243e+06	1.45273e+06	9.99145e+06	2463195	0	0	0	15.9541	10.25	4	4		0				0				0				0				0				0			644	67.5185	7.60596
Q92945	Far upstream element-binding protein 2 OS=Homo sapiens OX=9606 GN=KHSRP PE=1 SV=4 - [FUBP2_HUMAN]	13.64	1	6	6	14	1.01224e+07	2.57335e+06	6.83615e+06	3.5867e+06	2.60128e+06	0	0	14.4871	7.45	4	4	11.0148	6.05	3	3	11.4507	8.44	3	3	5.81963	3.94	2	2	5.68635	4.36	2	2		0				0			711	73.07	7.29834
Q16658	Fascin OS=Homo sapiens OX=9606 GN=FSCN1 PE=1 SV=3 - [FSCN1_HUMAN]	47.87	1	16	16	67	2.49381e+07	1.32956e+07	2.88215e+07	1.39029e+07	1.63984e+07	5.02203e+06	1.29306e+06	45.2211	35.29	11	14	35.5316	26.17	9	11	43.438	29.01	10	11	37.6236	27.79	8	10	46.0903	34.28	12	14	20.5898	20.49	7	7		0			493	54.4961	7.23975
P49327	Fatty acid synthase OS=Homo sapiens OX=9606 GN=FASN PE=1 SV=3 - [FAS_HUMAN]	4.78	1	6	6	12	2.89006e+06	2.14062e+06	6.44176e+06	269716	1.6654e+06	0	0	15.169	2.51	3	4	7.22994	1.91	2	2	6.59986	1.59	2	2	6.69011	1.63	2	2	7.75983	1.59	2	2		0				0			2511	273.254	6.44287
P15090	Fatty acid-binding protein, adipocyte OS=Homo sapiens OX=9606 GN=FABP4 PE=1 SV=3 - [FABP4_HUMAN]	25	1	2	3	6	0	0	2.30371e+07	4.82489e+06	6.57772e+06	0	0						0			7.25523	15.91	2	2	10.3352	25	3	3		0								0			132	14.7095	7.13721
O15540	Fatty acid-binding protein, brain OS=Homo sapiens OX=9606 GN=FABP7 PE=1 SV=3 - [FABP7_HUMAN]	61.36	1	6	6	35	7.32002e+07	1.05846e+08	0	6.55381e+07	2.36966e+07	0	7.96441e+06	22.1524	37.12	4	7	30.6422	61.36	6	11		0			22.1543	43.94	5	8	15.5175	37.12	4	6		0			7.21866	37.12	3	3	132	14.8795	5.59229
Q01469	Fatty acid-binding protein, epidermal OS=Homo sapiens OX=9606 GN=FABP5 PE=1 SV=3 - [FABP5_HUMAN]	65.93	1	12	12	86	7.08705e+07	28694488	1.54932e+08	2.42313e+07	5.89912e+07	3.69827e+07	8.44821e+06	63.7731	59.26	11	17	38.3264	58.52	9	11	59.0545	65.19	11	18	39.6411	64.44	8	10	46.2241	63.7	7	12	32.7296	58.52	8	11	16.6429	53.33	7	7	135	15.1546	7.00537
P05413	Fatty acid-binding protein, heart OS=Homo sapiens OX=9606 GN=FABP3 PE=1 SV=4 - [FABPH_HUMAN]	35.34	1	4	4	5	0	0	0	0	1.3107e+07	0	0						0				0							15.1007	35.34	4	5						0			133	14.8487	6.80029
P51648	Fatty aldehyde dehydrogenase OS=Homo sapiens OX=9606 GN=ALDH3A2 PE=1 SV=1 - [AL3A2_HUMAN]	20.62	1	7	7	13	4.51575e+06	3.23506e+06	5.90247e+06	2.20932e+06	1.39556e+06	0	0	16.5905	12.37	4	4	14.43	12.16	4	4		0			10.2784	9.28	3	3	6.93746	5.98	2	2		0				0			485	54.8129	7.88428
Q9UK22	F-box only protein 2 OS=Homo sapiens OX=9606 GN=FBXO2 PE=1 SV=2 - [FBX2_HUMAN]	44.59	1	10	10	39	9.22995e+06	1.66486e+07	0	9.45765e+06	5.12531e+07	0	4.26268e+06	14.8268	21.28	4	4	32.8505	36.15	7	10					23.1492	32.77	7	7	60.7209	44.59	10	16					8.63396	9.12	2	2	296	33.3068	4.37354
Q96AC1	Fermitin family homolog 2 OS=Homo sapiens OX=9606 GN=FERMT2 PE=1 SV=1 - [FERM2_HUMAN]	17.65	1	7	7	14	3.52129e+06	2.98819e+06	0	0	2.29818e+06	2.4654e+06	0	12.0289	6.76	3	3	24.4004	15.15	6	6		0				0			14.4061	8.82	3	3	7.65953	4.41	2	2		0			680	77.8106	6.69775
Q86UX7	Fermitin family homolog 3 OS=Homo sapiens OX=9606 GN=FERMT3 PE=1 SV=1 - [URP2_HUMAN]	9.45	1	5	5	5	0	0	0	3.31927e+06	0	2.28031e+06	0		0				0								0				0			19.0272	9.45	5	5		0			667	75.905	6.97607
P02794	Ferritin heavy chain OS=Homo sapiens OX=9606 GN=FTH1 PE=1 SV=2 - [FRIH_HUMAN]	60.11	1	8	8	44	1.24309e+07	1.85335e+07	6.40557e+06	4.00455e+06	2.1916e+07	2.32279e+07	8.67838e+06	4.291	34.43	4	4	19.7969	60.11	6	9		0			6.376	20.77	2	2	21.6459	57.38	7	8	23.0446	60.11	7	13	18.8651	51.91	5	8	183	21.2123	5.5542
P02792	Ferritin light chain OS=Homo sapiens OX=9606 GN=FTL PE=1 SV=2 - [FRIL_HUMAN]	42.86	1	6	6	47	6.17691e+06	2.19615e+07	1.17125e+07	7.04417e+06	2.93333e+07	5.97425e+07	2.20407e+07	4.57343	19.43	2	2	26.4835	42.86	6	7	15.893	28.57	3	5		0			33.3977	42.86	6	9	40.465	42.86	6	14	32.037	34.29	5	10	175	20.0071	5.78271
P35555	Fibrillin-1 OS=Homo sapiens OX=9606 GN=FBN1 PE=1 SV=3 - [FBN1_HUMAN]	25.5	1	45	45	99	1.55564e+06	0	4.02383e+07	853197	1.13712e+07	8.06312e+06	0	12.4079	1.99	3	3		0			192.955	23.75	41	46	9.33236	1.99	3	3	120.724	17	28	29	71.639	9.93	18	18		0			2871	312.022	4.93213
P02671	Fibrinogen alpha chain OS=Homo sapiens OX=9606 GN=FGA PE=1 SV=2 - [FIBA_HUMAN]	38.8	1	30	30	236	6.80406e+07	1.19833e+07	1.17158e+08	33872408	6.58051e+07	7.65125e+07	1.14865e+08	166.659	33.6	23	44	52.1553	25.87	15	17	82.9783	25.06	15	25	109.957	26.91	18	32	138.693	29.56	19	38	158.303	27.6	18	40	140.971	24.48	19	40	866	94.9144	6.01123
P02675	Fibrinogen beta chain OS=Homo sapiens OX=9606 GN=FGB PE=1 SV=2 - [FIBB_HUMAN]	72.3	1	39	39	449	9.30224e+07	1.37054e+07	2.03164e+08	5.37045e+07	1.09502e+08	1.58641e+08	1.69849e+08	263.257	69.25	32	63	86.6086	48.07	18	23	215.55	67.82	28	56	174.658	67.21	26	41	230.707	65.38	27	54	353.268	70.67	31	88	502.297	70.47	37	124	491	55.8923	8.26514
P02679	Fibrinogen gamma chain OS=Homo sapiens OX=9606 GN=FGG PE=1 SV=3 - [FIBG_HUMAN]	55.85	1	21	21	289	1.49568e+08	2.90069e+07	3.26452e+08	8.304e+07	1.88589e+08	2.68269e+08	2.83517e+08	147.094	53.64	17	37	81.5996	51.66	15	24	134.998	53.64	17	36	119.284	53.64	17	33	138.191	54.08	18	37	208.738	53.64	18	54	253.326	53.64	20	68	453	51.4789	5.61768
P05230	Fibroblast growth factor 1 OS=Homo sapiens OX=9606 GN=FGF1 PE=1 SV=1 - [FGF1_HUMAN]	22.58	1	3	3	6	2.23647e+06	6.15955e+06	0	1.47227e+06	2.29804e+06	0	0		0			5.8601	15.48	2	2					4.09045	14.84	2	2	3.50895	14.84	2	2									155	17.4487	7.02002
Q14314	Fibroleukin OS=Homo sapiens OX=9606 GN=FGL2 PE=1 SV=1 - [FGL2_HUMAN]	8.2	1	2	2	3	0	0	0	0	0	1.91915e+06	0		0				0				0				0				0			8.80121	8.2	2	3		0			439	50.1968	7.38623
Q06828	Fibromodulin OS=Homo sapiens OX=9606 GN=FMOD PE=1 SV=2 - [FMOD_HUMAN]	13.3	1	3	3	5	0	0	1.7392e+07	0	0	6.18128e+06	0						0			11.1727	7.71	2	3						0			8.16855	10.11	2	2					376	43.1515	6.03662
P02751	Fibronectin OS=Homo sapiens OX=9606 GN=FN1 PE=1 SV=4 - [FINC_HUMAN]	45.68	1	71	71	366	9.77831e+06	5.44644e+06	1.25959e+08	1.29912e+07	7.13522e+06	4.83354e+07	3.34414e+07	95.7455	14.54	20	22	89.2353	12.82	18	22	355.877	32.06	51	84	140.355	18.36	27	33	95.4898	12.95	18	22	378.498	38.14	55	89	387.2	37.26	56	94	2386	262.46	5.70654
P23142	Fibulin-1 OS=Homo sapiens OX=9606 GN=FBLN1 PE=1 SV=4 - [FBLN1_HUMAN]	43.39	1	20	20	88	1.35127e+07	5.43248e+06	3.06991e+07	7.24492e+06	5.99305e+06	5.84773e+07	3.69205e+06	45.5427	23.04	9	10	32.0166	18.35	8	8	41.7683	26.88	9	10	31.58	16.07	7	8	21.4712	12.66	5	5	158.048	37.27	19	41	24.4484	13.51	6	6	703	77.1624	5.22412
P98095	Fibulin-2 OS=Homo sapiens OX=9606 GN=FBLN2 PE=1 SV=2 - [FBLN2_HUMAN]	19.59	1	16	16	20	0	0	13422817	767457	1.167e+06	1.77195e+07	0		0				0				0				0				0			86.2444	19.59	16	20		0			1184	126.489	4.81787
Q9UBX5	Fibulin-5 OS=Homo sapiens OX=9606 GN=FBLN5 PE=1 SV=1 - [FBLN5_HUMAN]	25.22	1	8	8	22	4.43404e+06	0	1.27544e+07	0	0	2.33621e+07	0	10.2754	5.13	2	3		0			19.0649	22.1	6	7		0				0			38.2866	16.96	7	12		0			448	50.1467	4.729
P21333	Filamin-A OS=Homo sapiens OX=9606 GN=FLNA PE=1 SV=4 - [FLNA_HUMAN]	61.28	1	106	110	736	7.77563e+07	4.23457e+07	2.62242e+08	4.29785e+07	2.91097e+07	5.37169e+07	3.51772e+06	489.615	49.3	83	136	401.321	48.43	81	110	669.433	58.71	102	186	359.774	46.05	75	99	256.814	38.91	61	76	405.11	46.85	78	115	50.0307	9.56	14	14	2647	280.564	6.06201
O75369	Filamin-B OS=Homo sapiens OX=9606 GN=FLNB PE=1 SV=2 - [FLNB_HUMAN]	46	1	71	75	260	2.13532e+07	3.79424e+06	5.19217e+07	1.1405e+07	3.12048e+06	9.72215e+06	0	248.19	37.32	59	68	52.8368	9.68	14	16	264.156	37.66	60	73	182.561	28.79	45	50		0			187.148	27.94	43	50		0			2602	277.99	5.73193
Q14315	Filamin-C OS=Homo sapiens OX=9606 GN=FLNC PE=1 SV=3 - [FLNC_HUMAN]	20.37	1	28	34	98	1.62982e+07	1.53509e+07	7.4539e+07	2.12481e+07	1.4092e+07	7.97833e+06	0	72.0499	11.38	17	20	110.436	13.72	24	28		0			71.3663	11.16	18	20	64.0311	7.89	14	17		0				0			2725	290.841	5.97314
P30043	Flavin reductase (NADPH) OS=Homo sapiens OX=9606 GN=BLVRB PE=1 SV=3 - [BLVRB_HUMAN]	65.53	1	9	9	69	4.02803e+07	3.11313e+07	2.86936e+07	3.0831e+07	3.16242e+07	3.109e+07	4.81215e+06	43.6222	61.17	8	12	46.9657	61.17	7	13	17.1079	32.52	4	6	42.3318	44.66	5	11	37.4922	51.94	6	11	45.7122	59.22	7	12	13.8696	25.24	4	4	206	22.1054	7.6499
O75955	Flotillin-1 OS=Homo sapiens OX=9606 GN=FLOT1 PE=1 SV=3 - [FLOT1_HUMAN]	33.96	1	10	10	16	1.95989e+06	0	6.71356e+07	1.04109e+06	3.23747e+06	0	0	18.6268	22.95	6	6		0			8.62155	6.32	2	2	7.87976	5.85	2	2	25.1906	15.69	5	6		0				0			427	47.3256	7.48877
P14207	Folate receptor beta OS=Homo sapiens OX=9606 GN=FOLR2 PE=1 SV=4 - [FOLR2_HUMAN]	27.45	1	5	5	6	0	0	3.61458e+06	0	2.53534e+06	4.125e+06	0		0				0			6.58392	15.69	2	2		0				0			9.1963	18.82	4	4		0			255	29.2598	7.53271
Q13642	Four and a half LIM domains protein 1 OS=Homo sapiens OX=9606 GN=FHL1 PE=1 SV=4 - [FHL1_HUMAN]	41.18	1	12	12	62	2.59454e+07	2.41532e+07	5.00088e+06	8.58562e+06	2.57051e+07	1.8575e+07	6.30019e+06	40.8484	32.82	8	10	55.4785	41.18	11	15	11.1847	10.84	3	3	16.7775	15.48	4	4	42.2293	30.96	8	11	50.1708	36.22	9	13	24.6089	27.55	6	6	323	36.2386	8.96826
Q14192	Four and a half LIM domains protein 2 OS=Homo sapiens OX=9606 GN=FHL2 PE=1 SV=3 - [FHL2_HUMAN]	26.52	1	4	4	5	2.86587e+06	0	9.12103e+06	0	0	6.2369e+06	0		0				0			9.20267	10.04	2	2		0				0			12.4055	20.79	3	3		0			279	32.1706	7.54736
Q5SZK8	FRAS1-related extracellular matrix protein 2 OS=Homo sapiens OX=9606 GN=FREM2 PE=1 SV=2 - [FREM2_HUMAN]	6.78	1	15	15	18	2.78334e+06	0	1.54982e+07	3.91178e+06	0	0	0	4.58575	1.01	2	2		0			23.8422	3.38	8	8	28.963	3.34	7	8		0				0				0			3169	350.937	5.03369
Q9H479	Fructosamine-3-kinase OS=Homo sapiens OX=9606 GN=FN3K PE=1 SV=1 - [FN3K_HUMAN]	9.06	1	2	2	2	0	0	0	0	0	0	0		0			4.10335	9.06	2	2						0				0				0							309	35.1489	7.54736
P09467	Fructose-1,6-bisphosphatase 1 OS=Homo sapiens OX=9606 GN=FBP1 PE=1 SV=5 - [F16P1_HUMAN]	32.25	1	7	7	12	440642	816758	9.9765e+06	4.65711e+06	0	1.7449e+06	0		0				0			6.8028	8.88	2	2	28.6864	28.11	6	7		0			11.1728	8.28	2	3		0			338	36.8188	6.99072
P04075	Fructose-bisphosphate aldolase A OS=Homo sapiens OX=9606 GN=ALDOA PE=1 SV=2 - [ALDOA_HUMAN]	67.58	1	17	19	213	1.29465e+08	1.31221e+08	1.98521e+08	1.0313e+08	2.18127e+08	4.98958e+07	1.97642e+07	131.852	67.58	18	35	126.875	67.58	18	35	104.048	54.95	15	27	127.391	67.58	19	38	171.054	67.58	19	44	75.1375	42.31	13	22	50.794	39.84	9	12	364	39.3953	8.08936
P09972	Fructose-bisphosphate aldolase C OS=Homo sapiens OX=9606 GN=ALDOC PE=1 SV=2 - [ALDOC_HUMAN]	63.74	1	18	20	114	6.15824e+07	7.31326e+07	9.87165e+07	5.71859e+07	1.46396e+08	2.90003e+07	1.46507e+07	78.9796	37.64	11	18	82.3695	40.38	12	20		0			73.3587	34.62	9	17	164.444	63.74	20	40		0			39.0099	37.64	8	10	364	39.4312	6.87354
P07954	Fumarate hydratase, mitochondrial OS=Homo sapiens OX=9606 GN=FH PE=1 SV=3 - [FUMH_HUMAN]	23.92	1	8	8	29	2.5136e+06	2.35915e+06	1.58854e+07	2.66792e+06	5.3166e+06	1.89582e+06	0	13.0371	10.39	3	3	16.5898	14.9	5	5	15.4109	14.9	4	5	14.9865	17.06	5	5	29.5601	23.92	8	9	10.4796	6.27	2	2		0			510	54.6022	8.76318
Q9H0Q3	FXYD domain-containing ion transport regulator 6 OS=Homo sapiens OX=9606 GN=FXYD6 PE=1 SV=1 - [FXYD6_HUMAN]	40	1	3	3	4	0	0	0	0	8.88097e+06	0	0						0				0							15.4155	40	3	4									95	10.5354	5.09717
P51570	Galactokinase OS=Homo sapiens OX=9606 GN=GALK1 PE=1 SV=1 - [GALK1_HUMAN]	6.12	1	2	2	2	0	4.63143e+06	0	4.17276e+06	0	0	0		0				0							5.42977	6.12	2	2		0								0			392	42.2456	6.45557
P09382	Galectin-1 OS=Homo sapiens OX=9606 GN=LGALS1 PE=1 SV=2 - [LEG1_HUMAN]	48.15	1	5	5	124	2.75185e+08	2.24092e+08	4.34923e+08	1.06977e+08	1.3511e+08	1.36668e+08	3.69267e+07	95.7511	48.15	5	23	100.709	39.26	4	25	57.968	39.26	4	16	49.7408	39.26	4	13	65.122	39.26	4	17	66.1142	39.26	4	18	44.1938	48.15	5	12	135	14.7062	5.50342
P17931	Galectin-3 OS=Homo sapiens OX=9606 GN=LGALS3 PE=1 SV=5 - [LEG3_HUMAN]	29.6	1	6	6	47	3.47274e+07	3.00848e+07	2.21641e+08	2.55675e+07	8.47147e+06	1.1797e+07	2.3079e+06	14.4905	25.6	5	7	14.6836	25.6	5	7	30.4795	23.6	5	13	21.5555	25.6	5	9	6.2218	16	3	3	12.9623	19.6	4	6	5.68203	9.6	2	2	250	26.1361	8.55811
Q08380	Galectin-3-binding protein OS=Homo sapiens OX=9606 GN=LGALS3BP PE=1 SV=1 - [LG3BP_HUMAN]	31.45	1	11	11	38	1.22022e+07	4.06877e+06	2.447e+07	5.83907e+06	2.47288e+06	4.39764e+06	9.01845e+06	24.4948	18.8	7	7	14.9052	10.09	3	3	24.9858	18.46	7	8	12.6529	9.91	4	4		0			20.9651	13.85	5	5	38.0448	22.39	8	11	585	65.2893	5.2749
P47929	Galectin-7 OS=Homo sapiens OX=9606 GN=LGALS7 PE=1 SV=2 - [LEG7_HUMAN]	44.85	1	4	4	9	4.95462e+06	0	3.93193e+07	9.52408e+06	0	0	0	8.10753	24.26	2	2		0			27.0435	44.85	4	7		0								0				0			136	15.0658	7.62061
Q9UEY8	Gamma-adducin OS=Homo sapiens OX=9606 GN=ADD3 PE=1 SV=1 - [ADDG_HUMAN]	25.5	1	12	12	32	4.15737e+06	4.20911e+06	0	1.97169e+06	1.13646e+07	4.61972e+06	1.6626e+06	12.3031	6.37	4	4	14.0947	8.36	5	5		0			6.95832	3.4	2	2	39.5444	22.1	10	12	28.3393	12.61	6	7	6.35965	3.68	2	2	706	79.1052	6.31592
P09104	Gamma-enolase OS=Homo sapiens OX=9606 GN=ENO2 PE=1 SV=3 - [ENOG_HUMAN]	59.91	1	13	15	112	4.59755e+07	4.28592e+07	4.61528e+07	1.65404e+07	7.96537e+07	1.6196e+07	8.94783e+06	110.662	44.01	11	25	113.062	44.01	11	26	36.4075	18.66	4	8	51.3379	26.96	7	12	156.221	59.91	15	35		0				0			434	47.239	5.03369
Q92820	Gamma-glutamyl hydrolase OS=Homo sapiens OX=9606 GN=GGH PE=1 SV=2 - [GGH_HUMAN]	9.12	1	2	2	2	5.15375e+06	0	9.19314e+06	0	0	0	0		0				0			9.11354	9.12	2	2						0				0				0			318	35.9412	7.10791
O75223	Gamma-glutamylcyclotransferase OS=Homo sapiens OX=9606 GN=GGCT PE=1 SV=1 - [GGCT_HUMAN]	12.23	1	2	2	4	3.41912e+06	3.26889e+06	0	3.13761e+06	2.1763e+06	2.50139e+06	0		0			8.51188	12.23	2	2		0			8.03275	12.23	2	2		0				0				0			188	20.9943	5.13525
Q16666	Gamma-interferon-inducible protein 16 OS=Homo sapiens OX=9606 GN=IFI16 PE=1 SV=3 - [IF16_HUMAN]	6.37	1	3	3	4	2.15509e+06	0	0	0	0	1.32255e+06	0	8.90765	6.37	3	4		0				0				0				0				0				0			785	88.1994	9.27588
O76070	Gamma-synuclein OS=Homo sapiens OX=9606 GN=SNCG PE=1 SV=2 - [SYUG_HUMAN]	48.82	1	5	5	8	0	0	0	0	4.4245e+06	0	0						0				0				0			32.1826	48.82	5	8									127	13.3228	4.85596
P17900	Ganglioside GM2 activator OS=Homo sapiens OX=9606 GN=GM2A PE=1 SV=4 - [SAP3_HUMAN]	17.62	1	2	2	2	0	0	1.37234e+06	0	0	0	1.3869e+06										0															0	17.62	2	2	193	20.8247	5.31299
Q8TB36	Ganglioside-induced differentiation-associated protein 1 OS=Homo sapiens OX=9606 GN=GDAP1 PE=1 SV=3 - [GDAP1_HUMAN]	7.26	1	2	2	2	0	916371	0	0	8.58876e+06	0	0		0				0				0							9.55823	7.26	2	2		0				0			358	41.3196	8.33838
P17302	Gap junction alpha-1 protein OS=Homo sapiens OX=9606 GN=GJA1 PE=1 SV=2 - [CXA1_HUMAN]	36.39	1	10	10	78	1.47028e+07	1.30281e+07	4.67869e+07	2.63888e+07	5.27528e+07	0	1.90229e+07	36.1945	33.25	8	9	46.7862	29.32	6	11	55.3278	33.77	9	14	50.9889	28.01	7	11	66.4805	36.13	9	17		0			68.2133	33.77	9	16	382	42.9809	8.76318
P29033	Gap junction beta-2 protein OS=Homo sapiens OX=9606 GN=GJB2 PE=1 SV=3 - [CXB2_HUMAN]	11.06	1	2	2	5	0	0	4.04242e+06	1.51726e+06	0	0	0		0				0			7.75308	11.06	2	3	4.82542	11.06	2	2		0				0							226	26.1976	8.88037
O95479	GDH/6PGL endoplasmic bifunctional protein OS=Homo sapiens OX=9606 GN=H6PD PE=1 SV=2 - [G6PE_HUMAN]	2.91	1	2	2	2	0	690933	0	0	0	1.1933e+06	0		0				0				0				0				0			3.9616	2.91	2	2		0			791	88.8364	7.29834
P06396	Gelsolin OS=Homo sapiens OX=9606 GN=GSN PE=1 SV=1 - [GELS_HUMAN]	41.05	1	24	24	272	9.31793e+07	7.8391e+07	2.75015e+08	6.6139e+07	5.4433e+07	5.07934e+07	4.20338e+07	150.753	37.08	19	38	154.49	37.08	19	39	167.715	33.12	19	42	179.992	39.39	20	46	124.432	39.51	18	33	145.99	35.68	16	36	144.415	39.64	19	38	782	85.6442	6.27783
P78347	General transcription factor II-I OS=Homo sapiens OX=9606 GN=GTF2I PE=1 SV=2 - [GTF2I_HUMAN]	4.51	1	2	2	2	0	0	6.42364e+06	0	0	0	0		0				0			7.23102	4.51	2	2		0				0				0				0			998	112.346	6.39209
O60763	General vesicular transport factor p115 OS=Homo sapiens OX=9606 GN=USO1 PE=1 SV=2 - [USO1_HUMAN]	10.19	1	6	6	13	1.31563e+06	575947	7.49866e+06	1.01998e+06	0	882944	0	12.4914	4.89	3	3		0			23.4498	6.34	4	5	12.2475	5.2	3	3		0			8.46015	3.12	2	2		0			962	107.828	4.90674
P60983	Glia maturation factor beta OS=Homo sapiens OX=9606 GN=GMFB PE=1 SV=2 - [GMFB_HUMAN]	51.41	1	5	5	24	1.05498e+07	1.20429e+07	6.4848e+06	6.60514e+06	1.15964e+07	0	3.51976e+06	11.1516	42.96	3	3	28.6627	51.41	5	9	9.66115	26.76	2	3	11.4442	49.3	4	4	16.6189	49.3	4	5						0			142	16.7025	5.2876
P14136	Glial fibrillary acidic protein OS=Homo sapiens OX=9606 GN=GFAP PE=1 SV=1 - [GFAP_HUMAN]	81.02	1	46	48	2783	7860337984	1.04173e+10	9.52956e+06	6.63113e+09	3.73066e+09	2.57147e+07	1.25835e+09	1900.11	72.69	43	645	3039.7	78.94	47	1002	11.9452	12.04	4	4	1699.54	70.37	41	610	830.05	64.12	32	276	87.71	42.82	18	25	762.053	71.06	37	221	432	49.8496	5.51611
P46926	Glucosamine-6-phosphate isomerase 1 OS=Homo sapiens OX=9606 GN=GNPDA1 PE=1 SV=1 - [GNPI1_HUMAN]	30.45	2	5	5	6	2.482e+06	2.71568e+06	0	2.41743e+06	0	2.93181e+06	0	5.97915	7.61	2	2	6.92813	16.96	2	2						0				0			3.8591	12.8	2	2					289	32.6476	6.91748
Q6PCE3	Glucose 1,6-bisphosphate synthase OS=Homo sapiens OX=9606 GN=PGM2L1 PE=1 SV=3 - [PGM2L_HUMAN]	12.38	1	5	5	5	0	0	0	0	4.48229e+06	0	0		0				0				0				0			12.3181	12.38	5	5		0				0			622	70.3965	7.15186
P11413	Glucose-6-phosphate 1-dehydrogenase OS=Homo sapiens OX=9606 GN=G6PD PE=1 SV=4 - [G6PD_HUMAN]	29.9	1	11	11	32	6.74764e+06	5.39319e+06	6.93769e+06	3.72927e+06	2.55421e+06	2.67814e+06	0	32.5194	22.14	8	10	22.0968	20.19	7	7	11.0754	10.87	4	4	22.6043	19.03	7	7	4.16689	6.02	2	2	3.15739	6.99	2	2		0			515	59.219	6.84424
P06744	Glucose-6-phosphate isomerase OS=Homo sapiens OX=9606 GN=GPI PE=1 SV=4 - [G6PI_HUMAN]	40.86	1	15	15	115	2.96309e+07	2.80664e+07	5.90804e+07	2.9649e+07	4.49139e+07	2.14086e+07	8.3442e+06	61.3949	37.99	13	20	77.4011	37.63	13	25	53.1709	34.77	12	17	64.6343	40.86	14	20	58.3862	35.3	13	18	33.2472	20.97	8	10	13.8832	12.54	4	5	558	63.1072	8.32373
P14314	Glucosidase 2 subunit beta OS=Homo sapiens OX=9606 GN=PRKCSH PE=1 SV=2 - [GLU2B_HUMAN]	22.92	1	9	9	41	2.50395e+07	9.81872e+06	3.586e+07	1.05979e+07	9.95721e+06	1.38164e+07	0	37.3356	18.56	6	9	26.8291	16.67	5	6	35.6754	18.56	7	8	32.3049	19.13	7	8	14.7641	10.8	4	4	25.7532	16.48	5	6		0			528	59.3878	4.41162
P00367	Glutamate dehydrogenase 1, mitochondrial OS=Homo sapiens OX=9606 GN=GLUD1 PE=1 SV=2 - [DHE3_HUMAN]	44.09	1	21	21	110	2.8389e+07	3.94871e+07	6.78842e+07	2.99534e+07	8.03334e+07	1.89311e+07	4.4232e+06	64.469	34.77	14	18	78.4911	37.81	15	21	48.8618	29.75	11	12	57.9978	32.62	13	16	94.5609	41.22	18	26	42.4759	27.6	10	12	16.1607	10.93	4	5	558	61.3592	7.79639
O94925	Glutaminase kidney isoform, mitochondrial OS=Homo sapiens OX=9606 GN=GLS PE=1 SV=1 - [GLSK_HUMAN]	23.47	1	9	9	13	0	0	2.33741e+07	0	3.5057e+06	0	0						0			37.3293	23.47	9	9		0			16.6674	9.42	4	4		0				0			669	73.4139	7.76709
P15104	Glutamine synthetase OS=Homo sapiens OX=9606 GN=GLUL PE=1 SV=4 - [GLNA_HUMAN]	30.29	1	8	8	23	6811790	1.57294e+07	1.53245e+07	1.03817e+07	2.77458e+07	3.34095e+06	0	14.0486	14.21	3	3	30.6689	30.29	7	7		0			21.9019	17.43	5	5	36.1802	30.29	8	8		0							373	42.0373	6.88818
P47897	Glutamine--tRNA ligase OS=Homo sapiens OX=9606 GN=QARS PE=1 SV=1 - [SYQ_HUMAN]	9.68	1	5	5	5	0	0	8.66043e+06	911709	0	989513	0		0				0			14.7164	9.68	5	5		0				0				0				0			775	87.7429	7.15186
Q16769	Glutaminyl-peptide cyclotransferase OS=Homo sapiens OX=9606 GN=QPCT PE=1 SV=1 - [QPCT_HUMAN]	12.47	1	3	3	3	0	0	0	1.52265e+06	0	0	0						0				0			6.7511	12.47	3	3		0								0			361	40.8508	6.60986
Q07075	Glutamyl aminopeptidase OS=Homo sapiens OX=9606 GN=ENPEP PE=1 SV=3 - [AMPE_HUMAN]	7	1	4	4	4	0	0	0	0	0	2.90388e+06	0		0				0				0				0				0			6.88429	7	4	4		0			957	109.176	5.46533
P36269	Glutathione hydrolase 5 proenzyme OS=Homo sapiens OX=9606 GN=GGT5 PE=1 SV=2 - [GGT5_HUMAN]	30.89	1	12	12	42	989226	710970	1.86385e+07	1.13952e+06	3.53341e+06	1.52014e+07	0	7.03174	4.95	2	2		0			39.3337	24.06	9	12	8.78024	10.92	3	3	17.0129	10.07	4	5	66.0294	26.11	10	20		0			586	62.2223	7.54736
P07203	Glutathione peroxidase 1 OS=Homo sapiens OX=9606 GN=GPX1 PE=1 SV=4 - [GPX1_HUMAN]	65.02	1	9	9	29	1.72138e+07	8.39459e+06	2.78074e+07	6.85047e+06	4.43124e+06	6.82266e+06	0	22.3956	46.31	6	8	10.615	25.12	3	3	10.4646	43.35	5	5	11.1502	38.92	4	4	11.5443	26.11	4	4	12.8813	35.47	5	5					203	22.0751	6.55127
P22352	Glutathione peroxidase 3 OS=Homo sapiens OX=9606 GN=GPX3 PE=1 SV=2 - [GPX3_HUMAN]	25.66	1	4	4	12	3.36852e+06	0	1.33441e+07	0	0	3.67824e+07	2.81674e+06		0				0			10.9468	18.14	3	3		0				0			22.2612	25.66	4	7	5.40357	13.72	2	2	226	25.5369	8.1333
P00390	Glutathione reductase, mitochondrial OS=Homo sapiens OX=9606 GN=GSR PE=1 SV=2 - [GSHR_HUMAN]	25.67	1	8	8	26	1.03402e+07	8.17153e+06	1.11746e+07	4.26691e+06	5.01627e+06	4.61021e+06	2.15393e+06	16.8525	16.86	5	5	29.7825	22.8	7	8	10.6757	10.92	3	3	13.8821	12.07	4	4	14.6245	10.73	4	4	7.4417	6.51	2	2		0			522	56.221	8.49951
Q9Y2Q3	Glutathione S-transferase kappa 1 OS=Homo sapiens OX=9606 GN=GSTK1 PE=1 SV=3 - [GSTK1_HUMAN]	24.78	1	4	4	7	5.23762e+06	2.46469e+06	2.64858e+07	4.1423e+06	2.84619e+06	5.15865e+06	0		0				0			9.69257	13.27	2	2	6.99381	13.72	2	2		0			10.9099	18.58	3	3		0			226	25.4803	8.41162
P09488	Glutathione S-transferase Mu 1 OS=Homo sapiens OX=9606 GN=GSTM1 PE=1 SV=3 - [GSTM1_HUMAN]	41.74	2	5	7	19	7.46881e+06	0	7.06889e+06	1.73844e+07	4.44053e+06	3.45642e+06	5.50984e+06		0				0			7.82709	13.76	2	2	28.4656	37.61	6	8		0			12.1035	19.72	3	3	12.7004	23.85	4	4	218	25.6951	6.69775
P28161	Glutathione S-transferase Mu 2 OS=Homo sapiens OX=9606 GN=GSTM2 PE=1 SV=2 - [GSTM2_HUMAN]	39.91	1	4	7	29	5.48717e+06	4.27777e+06	5.98079e+06	1.34351e+07	1.25588e+07	3.76136e+06	4.81054e+06	7.50781	13.76	2	2	8.03388	13.76	2	2		0			22.9283	32.57	6	8	20.8181	28.9	5	7	13.262	17.89	3	4	10.164	27.52	4	4	218	25.728	6.3667
P21266	Glutathione S-transferase Mu 3 OS=Homo sapiens OX=9606 GN=GSTM3 PE=1 SV=3 - [GSTM3_HUMAN]	56.44	1	9	10	31	6.28461e+06	4.03133e+06	5.53355e+06	9.04034e+06	1.2446e+07	5.50845e+06	5.71716e+06	7.49614	11.56	2	2		0			8.64425	17.33	3	3	25.5988	42.67	8	9	23.9415	32.44	6	7	9.84854	16.44	3	4	18.7209	26.67	5	6	225	26.5421	5.5415
P78417	Glutathione S-transferase omega-1 OS=Homo sapiens OX=9606 GN=GSTO1 PE=1 SV=2 - [GSTO1_HUMAN]	36.51	1	6	6	17	9.21506e+06	6.21608e+06	2.43733e+07	4.88192e+06	4.00313e+06	420414	0	11.6269	12.03	3	4	5.86974	8.3	2	2	17.077	32.78	5	6	8.066	12.03	3	3	5.53119	7.88	2	2		0				0			241	27.548	6.59521
P09211	Glutathione S-transferase P OS=Homo sapiens OX=9606 GN=GSTP1 PE=1 SV=2 - [GSTP1_HUMAN]	64.29	1	11	11	131	1.64127e+08	6.59792e+07	1.69199e+08	1.30669e+08	5.76238e+07	2.23615e+07	1.73828e+07	131.832	64.29	10	27	117.053	64.29	9	24	89.0396	55.24	7	20	115.898	64.29	10	24	81.33	60.95	10	17	65.8839	42.86	6	13	23.2914	40.48	5	6	210	23.341	5.64307
P0CG29	Glutathione S-transferase theta-2 OS=Homo sapiens OX=9606 GN=GSTT2 PE=1 SV=1 - [GST2_HUMAN]	18.03	2	3	3	4	0	6.82941e+06	0	3.9584e+06	0	0	2.01073e+06					6.11308	12.7	2	2					6.3399	11.48	2	2		0				0				0			244	27.4886	7.02002
P48637	Glutathione synthetase OS=Homo sapiens OX=9606 GN=GSS PE=1 SV=1 - [GSHB_HUMAN]	16.24	1	5	5	7	4.35634e+06	2.03925e+06	0	0	0	0	0	15.7492	14.35	4	4	11.15	10.55	3	3		0				0				0				0							474	52.3523	5.92236
P04406	Glyceraldehyde-3-phosphate dehydrogenase OS=Homo sapiens OX=9606 GN=GAPDH PE=1 SV=3 - [G3P_HUMAN]	64.18	1	19	19	609	5.00068e+08	4.5563e+08	5.33692e+08	3.62024e+08	5.3175e+08	1.33864e+08	9.99299e+07	359.596	64.18	19	103	449.434	64.18	19	127	260.514	57.01	15	69	328.251	64.18	19	88	401.851	63.88	16	115	186.698	52.84	15	52	201.844	52.84	16	55	335	36.0304	8.45557
P21695	Glycerol-3-phosphate dehydrogenase [NAD(+)], cytoplasmic OS=Homo sapiens OX=9606 GN=GPD1 PE=1 SV=4 - [GPDA_HUMAN]	8.6	1	2	2	2	0	0	0	0	6.23697e+06	0	0										0							9.40383	8.6	2	2						0			349	37.5433	6.17627
P43304	Glycerol-3-phosphate dehydrogenase, mitochondrial OS=Homo sapiens OX=9606 GN=GPD2 PE=1 SV=3 - [GPDM_HUMAN]	14.44	1	7	7	9	2.34971e+06	1.69432e+06	3.61099e+06	2.59915e+06	4.03736e+06	0	0	5.20577	2.89	2	2	5.71581	4.81	2	2	6.68881	6.33	3	3		0			5.57461	2.89	2	2		0				0			727	80.8016	7.69385
P50440	Glycine amidinotransferase, mitochondrial OS=Homo sapiens OX=9606 GN=GATM PE=1 SV=1 - [GATM_HUMAN]	41.37	1	11	11	28	1.16294e+06	1.49353e+07	0	5.38925e+06	570909	1.15259e+06	1.85765e+06	8.55628	8.75	2	2	53.0674	41.37	11	13		0			31.6816	26.95	6	8		0			8.50273	12.77	3	3	5.17876	10.17	2	2	423	48.4243	8.04541
P41250	Glycine--tRNA ligase OS=Homo sapiens OX=9606 GN=GARS PE=1 SV=3 - [GARS_HUMAN]	10.96	1	5	5	8	1.12574e+06	1.90426e+06	4.57811e+06	1.99563e+06	0	1.07393e+06	0	10.5776	4.6	2	3		0			15.1491	10.96	5	5		0				0				0				0			739	83.1126	7.03467
P11216	Glycogen phosphorylase, brain form OS=Homo sapiens OX=9606 GN=PYGB PE=1 SV=5 - [PYGB_HUMAN]	28.23	1	15	18	55	1.46822e+07	1.63386e+07	0	13134896	2.36776e+07	4.44272e+06	1.64847e+06	27.8114	15.3	9	9	57.6184	22.89	14	16		0			43.7183	19.1	12	12	47.6814	22.06	13	13	8.04332	5.22	3	3	4.49572	4.63	2	2	843	96.6345	6.85889
P06737	Glycogen phosphorylase, liver form OS=Homo sapiens OX=9606 GN=PYGL PE=1 SV=4 - [PYGL_HUMAN]	19.48	1	11	13	28	9.82657e+06	8.82798e+06	1.02869e+07	9.0792e+06	1.41582e+07	5.30419e+06	0	10.2561	4.72	3	3	17.7241	8.74	6	6	10.5956	4.96	3	3	36.1915	14.99	10	11		0			8.43223	4.49	3	3		0			847	97.087	7.1665
P11217	Glycogen phosphorylase, muscle form OS=Homo sapiens OX=9606 GN=PYGM PE=1 SV=6 - [PYGM_HUMAN]	27.08	1	13	16	21	1.01449e+07	7.55418e+06	0	1.5533e+07	1.95511e+07	6.84508e+06	0		0				0				0				0			47.8361	23.99	14	14		0				0			842	97.0306	7.03467
P46976	Glycogenin-1 OS=Homo sapiens OX=9606 GN=GYG1 PE=1 SV=4 - [GLYG_HUMAN]	15.71	1	4	4	6	3.90356e+06	3.89763e+06	0	3.68706e+06	4.25578e+06	2.40732e+06	2.43474e+06	7.81598	9.43	2	2	3.14423	7.14	2	2						0			7.70559	8.57	2	2		0				0			350	39.3586	5.52881
P02724	Glycophorin-A OS=Homo sapiens OX=9606 GN=GYPA PE=1 SV=2 - [GLPA_HUMAN]	20.67	1	2	2	2	0	5.88194e+06	0	0	8.95481e+06	2.88127e+06	0						0								0			9.93724	20.67	2	2		0							150	16.3214	5.46533
Q9HC38	Glyoxalase domain-containing protein 4 OS=Homo sapiens OX=9606 GN=GLOD4 PE=1 SV=1 - [GLOD4_HUMAN]	13.1	1	3	3	10	9.21985e+06	0	8.90965e+06	7.62995e+06	9.40173e+06	0	0	8.07345	13.1	3	3		0			2.80107	9.58	2	2	2.79417	9.58	2	2	5.58961	13.1	3	3		0				0			313	34.7713	5.60498
Q9UBQ7	Glyoxylate reductase/hydroxypyruvate reductase OS=Homo sapiens OX=9606 GN=GRHPR PE=1 SV=1 - [GRHPR_HUMAN]	32.32	1	6	6	16	7.44295e+06	7.08068e+06	6.82501e+06	5.60274e+06	4.05919e+06	2.37555e+06	0		0			11.9682	21.34	4	4	8.7878	11.89	2	2	13.8926	19.82	4	4	12.4264	8.23	2	3	11.7598	15.55	3	3					328	35.6457	7.38623
P35052	Glypican-1 OS=Homo sapiens OX=9606 GN=GPC1 PE=1 SV=2 - [GPC1_HUMAN]	5.73	1	2	2	2	0	0	9.48944e+06	2.21643e+06	0	0	0						0				0			7.04521	5.73	2	2													558	61.641	7.29834
Q9Y625	Glypican-6 OS=Homo sapiens OX=9606 GN=GPC6 PE=1 SV=1 - [GPC6_HUMAN]	17.12	1	6	6	7	1.18029e+06	0	0	0	0	7791070	0		0				0				0				0				0			20.3587	17.12	6	7		0			555	62.6949	5.41455
P36959	GMP reductase 1 OS=Homo sapiens OX=9606 GN=GMPR PE=1 SV=1 - [GMPR1_HUMAN]	12.46	1	2	2	2	2585480	0	0	0	0	0	2.81414e+06		0								0				0				0				0			10.1714	12.46	2	2	345	37.3948	7.06396
Q92896	Golgi apparatus protein 1 OS=Homo sapiens OX=9606 GN=GLG1 PE=1 SV=2 - [GSLG1_HUMAN]	11.79	1	9	9	20	3.45387e+06	1.4452e+06	1.63596e+07	2.28975e+06	0	3.31774e+06	0	11.468	7.12	5	5		0			31.7379	10.26	8	9		0				0			14.2484	7.12	5	6		0			1179	134.464	6.90283
Q9H8Y8	Golgi reassembly-stacking protein 2 OS=Homo sapiens OX=9606 GN=GORASP2 PE=1 SV=3 - [GORS2_HUMAN]	8.63	1	2	2	4	0	0	9.53913e+06	1.92449e+06	0	2.36944e+06	0		0							6.57524	8.63	2	2		0							7.05771	8.63	2	2		0			452	47.116	4.81787
Q9H4G4	Golgi-associated plant pathogenesis-related protein 1 OS=Homo sapiens OX=9606 GN=GLIPR2 PE=1 SV=3 - [GAPR1_HUMAN]	31.17	1	3	3	10	1.95072e+06	2.82582e+06	0	0	6.9215e+06	3.86854e+06	1.98411e+06	8.03698	16.88	2	2	10.7666	31.17	3	3		0								0			11.8392	31.17	3	3	6.61929	22.73	2	2	154	17.2075	9.40771
Q9NZH0	G-protein coupled receptor family C group 5 member B OS=Homo sapiens OX=9606 GN=GPRC5B PE=2 SV=2 - [GPC5B_HUMAN]	5.96	1	2	2	2	0	1.82181e+06	0	0	6790893	0	0		0				0				0				0			5.91699	5.96	2	2		0				0			403	44.7656	8.23584
P28799	Granulins OS=Homo sapiens OX=9606 GN=GRN PE=1 SV=2 - [GRN_HUMAN]	6.41	1	4	4	12	0	1.28079e+06	9.88651e+06	1.97734e+06	0	3.51981e+06	1.61559e+06		0			7.6365	2.7	2	2	14.9923	4.89	3	4	10.9366	2.7	2	3		0			10.2019	4.22	3	3		0			593	63.4998	6.82959
P62993	Growth factor receptor-bound protein 2 OS=Homo sapiens OX=9606 GN=GRB2 PE=1 SV=1 - [GRB2_HUMAN]	17.51	1	3	3	12	3.66062e+06	3.17108e+06	7.04648e+06	3.08713e+06	5.4771e+06	0	0	6.60465	11.98	2	2	11.2769	17.51	3	3	7.18059	11.98	2	2	5.33389	11.98	2	2	10.666	17.51	3	3						0			217	25.1904	6.31592
Q9UIJ7	GTP:AMP phosphotransferase AK3, mitochondrial OS=Homo sapiens OX=9606 GN=AK3 PE=1 SV=4 - [KAD3_HUMAN]	19.38	1	3	3	14	2.02338e+06	3.57297e+06	8721020	4.37571e+06	4.26683e+06	3.67553e+06	0	6.87638	12.78	2	2	11.6687	19.38	3	3	11.3993	19.38	3	3	8.56532	12.78	2	2	8.25221	12.78	2	2	7.70964	13.22	2	2					227	25.5495	9.15869
P01112	GTPase HRas OS=Homo sapiens OX=9606 GN=HRAS PE=1 SV=1 - [RASH_HUMAN]	14.29	1	1	2	3	0	2.67301e+06	0	2.47609e+06	6.27228e+06	3.0636e+06	0		0				0				0			6.89862	14.29	2	2		0				0							189	21.2846	5.31299
P01116	GTPase KRas OS=Homo sapiens OX=9606 GN=KRAS PE=1 SV=1 - [RASK_HUMAN]	15.87	1	1	2	3	0	2.67301e+06	0	0	5.92164e+06	3.0636e+06	0						0				0				0			8.23234	15.87	2	2		0							189	21.642	6.771
P62826	GTP-binding nuclear protein Ran OS=Homo sapiens OX=9606 GN=RAN PE=1 SV=3 - [RAN_HUMAN]	32.87	1	7	7	31	2.49857e+07	1.34713e+07	4.14391e+07	1.50183e+07	1.502e+07	7.56175e+06	0	21.7989	24.07	5	6	14.9865	22.22	5	5	17.7881	16.2	3	5	16.9075	22.22	4	5	16.711	22.22	4	5	18.291	13.43	3	5					216	24.4076	7.48877
Q9NR31	GTP-binding protein SAR1a OS=Homo sapiens OX=9606 GN=SAR1A PE=1 SV=1 - [SAR1A_HUMAN]	17.17	2	3	3	4	5.57256e+06	0	1.18399e+07	5.43812e+06	5.43127e+06	4.51913e+06	0		0							4.79851	11.11	2	2		0				0			6.43598	11.62	2	2		0			198	22.3525	6.68311
Q9Y2T3	Guanine deaminase OS=Homo sapiens OX=9606 GN=GDA PE=1 SV=1 - [GUAD_HUMAN]	28.85	1	9	9	10	0	0	0	0	1.51394e+07	0	0		0								0				0			33.1884	28.85	9	10						0			454	50.9706	5.68115
P63096	Guanine nucleotide-binding protein G(i) subunit alpha-1 OS=Homo sapiens OX=9606 GN=GNAI1 PE=1 SV=2 - [GNAI1_HUMAN]	31.92	1	5	9	49	3.49056e+07	4.13414e+07	6.14648e+07	3.25633e+07	1.01758e+08	3.03508e+07	2.67092e+07		0				0				0				0			36.4369	25.42	7	13		0				0			354	40.3352	5.97314
P04899	Guanine nucleotide-binding protein G(i) subunit alpha-2 OS=Homo sapiens OX=9606 GN=GNAI2 PE=1 SV=3 - [GNAI2_HUMAN]	59.72	1	13	17	122	4.5739e+07	4.91195e+07	7.6842e+07	3.78814e+07	1.05967e+08	3.80133e+07	2.23711e+07	64.7692	52.96	13	19	66.8757	51.83	13	20	67.1111	45.07	13	18	45.6875	56.34	13	14	74.4928	46.2	12	22	86.9741	53.24	14	23	18.7328	22.54	5	6	355	40.4251	5.5415
Q9UBI6	Guanine nucleotide-binding protein G(I)/G(S)/G(O) subunit gamma-12 OS=Homo sapiens OX=9606 GN=GNG12 PE=1 SV=3 - [GBG12_HUMAN]	45.83	1	3	3	15	9.55029e+06	1.22754e+07	1.4581e+07	8.2799e+06	2.31322e+07	7.14473e+06	5.43069e+06	7.02476	45.83	3	3	10.987	45.83	3	4	6.94737	41.67	2	2	6.75474	41.67	2	2	7.90688	41.67	2	2		0			6.66511	41.67	2	2	72	8.00117	8.96826
P59768	Guanine nucleotide-binding protein G(I)/G(S)/G(O) subunit gamma-2 OS=Homo sapiens OX=9606 GN=GNG2 PE=1 SV=2 - [GBG2_HUMAN]	42.25	1	2	2	2	0	0	0	0	8.10943e+06	0	0										0							5.9105	42.25	2	2		0							71	7.84503	7.98682
P62873	Guanine nucleotide-binding protein G(I)/G(S)/G(T) subunit beta-1 OS=Homo sapiens OX=9606 GN=GNB1 PE=1 SV=3 - [GBB1_HUMAN]	61.18	1	8	13	106	3.72258e+07	3.56436e+07	5.78614e+07	2.6696e+07	1.26979e+08	2.84216e+07	8.71968e+06	61.2129	57.94	11	13	77.2214	55	11	17	54.529	33.53	8	13	53.8352	45.88	9	11	142.474	61.18	13	30	40.7314	39.12	7	9	55.5822	48.82	10	13	340	37.353	5.99854
P62879	Guanine nucleotide-binding protein G(I)/G(S)/G(T) subunit beta-2 OS=Homo sapiens OX=9606 GN=GNB2 PE=1 SV=3 - [GBB2_HUMAN]	52.06	1	7	12	77	3.31888e+07	3.05279e+07	5.62404e+07	2.07122e+07	1.05015e+08	2.26581e+07	6.86837e+06	47.6298	44.12	8	10	56.1984	35.29	7	12	36.016	26.47	6	9	41.9304	42.06	7	9	87.4868	45	10	22	25.0567	20.88	4	6	39.0174	25.88	5	9	340	37.3071	5.99854
P08754	Guanine nucleotide-binding protein G(k) subunit alpha OS=Homo sapiens OX=9606 GN=GNAI3 PE=1 SV=3 - [GNAI3_HUMAN]	26.84	1	4	8	58	3.49056e+07	4.13414e+07	6.14648e+07	3.25633e+07	1.01758e+08	3.03508e+07	2.67092e+07	24.7329	26.84	7	11	30.42	24.29	6	10	16.83	23.16	6	7		0			31.6262	21.75	6	12	30.6736	26.84	7	11		0			354	40.5063	5.69385
P09471	Guanine nucleotide-binding protein G(o) subunit alpha OS=Homo sapiens OX=9606 GN=GNAO1 PE=1 SV=4 - [GNAO_HUMAN]	37.85	1	10	12	81	3.01534e+07	4.03411e+07	7.63876e+07	3.22221e+07	1.53856e+08	2.23577e+07	1.99826e+07	24.3756	24.58	6	9	51.626	35.31	10	15		0			32.3108	25.99	7	10	123.524	37.85	11	34		0			26.259	21.19	5	6	354	40.0249	5.52881
P50148	Guanine nucleotide-binding protein G(q) subunit alpha OS=Homo sapiens OX=9606 GN=GNAQ PE=1 SV=4 - [GNAQ_HUMAN]	36.21	1	6	9	15	1.23336e+06	663255	0	0	6.66237e+06	3.69442e+06	0		0			6.18882	9.19	2	2		0				0			30.3419	32.03	8	9	9.4376	18.66	4	4		0			359	42.1153	5.68115
P63092	Guanine nucleotide-binding protein G(s) subunit alpha isoforms short OS=Homo sapiens OX=9606 GN=GNAS PE=1 SV=1 - [GNAS2_HUMAN]	20.05	2	6	7	34	2.49311e+07	2.92681e+07	4.15705e+07	2.35533e+07	6.47862e+07	1.78612e+07	2.51959e+07	14.1617	12.44	4	5	20.582	15.48	5	7	7.39131	9.14	3	3	14.7709	12.44	4	5	19.2393	14.72	5	7	17.5641	14.72	5	6		0			394	45.6359	5.8208
P19086	Guanine nucleotide-binding protein G(z) subunit alpha OS=Homo sapiens OX=9606 GN=GNAZ PE=1 SV=3 - [GNAZ_HUMAN]	17.75	1	4	4	4	0	0	0	0	5.8246e+06	0	0		0				0				0				0			15.9127	17.75	4	4		0				0			355	40.8979	7.60596
P29992	Guanine nucleotide-binding protein subunit alpha-11 OS=Homo sapiens OX=9606 GN=GNA11 PE=1 SV=2 - [GNA11_HUMAN]	23.4	1	3	6	9	0	0	5.60137e+06	1.85376e+06	6.02283e+06	4.06154e+06	0		0				0				0				0			16.012	19.78	5	5	9.15232	18.38	4	4		0			359	42.0965	5.69385
Q14344	Guanine nucleotide-binding protein subunit alpha-13 OS=Homo sapiens OX=9606 GN=GNA13 PE=1 SV=2 - [GNA13_HUMAN]	19.1	1	5	6	21	3.33101e+07	3.84996e+07	5.66531e+07	3.2598e+07	6.26019e+07	4.42169e+07	4.92764e+07	12.2983	12.73	3	4	12.8893	9.55	2	4	7.22313	9.55	2	2	8.5089	5.57	2	3	30.6895	15.92	5	8		0				0			377	44.0217	8.00146
Q9HAV0	Guanine nucleotide-binding protein subunit beta-4 OS=Homo sapiens OX=9606 GN=GNB4 PE=1 SV=3 - [GBB4_HUMAN]	34.71	1	3	7	45	3.31888e+07	2.68805e+07	5.11286e+07	2.11571e+07	1.02369e+08	2.26944e+07	8.54143e+06	20.379	31.18	6	6	30.8642	31.76	6	10		0			13.6749	19.12	4	4	41.3736	34.71	7	13	14.9997	19.12	4	5		0			340	37.543	5.99854
P32455	Guanylate-binding protein 1 OS=Homo sapiens OX=9606 GN=GBP1 PE=1 SV=2 - [GBP1_HUMAN]	4.73	1	1	2	3	0	3.39658e+06	0	5.48e+06	2.56492e+06	0	0		0			5.66947	4.73	2	2		0				0				0				0				0			592	67.8877	6.31592
P32456	Guanylate-binding protein 2 OS=Homo sapiens OX=9606 GN=GBP2 PE=1 SV=3 - [GBP2_HUMAN]	5.92	1	1	2	3	0	2.81898e+06	0	3.62586e+06	2.56492e+06	0	0		0				0				0			2.37758	5.92	2	2		0				0				0			591	67.1664	5.70654
Q6ZN66	Guanylate-binding protein 6 OS=Homo sapiens OX=9606 GN=GBP6 PE=2 SV=1 - [GBP6_HUMAN]	17.54	1	6	6	8	6.13561e+06	0	0	0	0	0	0	26.0293	17.54	6	8		0				0				0				0				0				0			633	72.3809	6.3667
Q9H0R4	Haloacid dehalogenase-like hydrolase domain-containing protein 2 OS=Homo sapiens OX=9606 GN=HDHD2 PE=1 SV=1 - [HDHD2_HUMAN]	13.13	1	2	2	6	1.66951e+06	459729	0	0	2.10103e+06	0	0	6.48279	13.13	2	3		0				0				0			9.58094	13.13	2	3		0				0			259	28.5179	6.23975
P00738	Haptoglobin OS=Homo sapiens OX=9606 GN=HP PE=1 SV=1 - [HPT_HUMAN]	48.52	1	11	21	172	1.60694e+08	3.14975e+07	6.13988e+07	6.14738e+07	1.29789e+07	8.20785e+07	2.41059e+08	104.693	44.33	16	31	56.0393	32.51	10	16	32.9612	23.65	8	10	77.7121	38.18	14	24	29.4235	26.6	8	8	89.6886	31.53	13	24	190.833	48.52	20	59	406	45.1766	6.58057
P00739	Haptoglobin-related protein OS=Homo sapiens OX=9606 GN=HPR PE=2 SV=2 - [HPTR_HUMAN]	42.53	1	5	15	73	8.52293e+07	1.61888e+07	1.72578e+07	3.17247e+07	4.53806e+06	4.78774e+07	1.15202e+08		0				0				0				0				0				0			85.1355	42.53	14	28	348	39.0047	7.09326
O43301	Heat shock 70 kDa protein 12A OS=Homo sapiens OX=9606 GN=HSPA12A PE=1 SV=2 - [HS12A_HUMAN]	25.78	1	13	13	23	1.28802e+07	2.18524e+06	0	3.09004e+06	8.71693e+06	2.93153e+06	0		0			12.1088	8.89	4	4		0			9.13686	8.3	4	4	49.5688	23.11	12	13	10.0801	4	2	2		0			675	74.9315	6.771
P0DMV8	Heat shock 70 kDa protein 1A OS=Homo sapiens OX=9606 GN=HSPA1A PE=1 SV=1 - [HS71A_HUMAN]	52.73	1	26	28	223	1.66972e+08	9.29152e+07	2.02563e+08	1.01203e+08	7.62851e+07	4.39226e+07	1.30749e+07	203.986	49.45	25	51	162.749	49.61	23	41	101.843	32.76	15	25	158.726	46.18	20	37	105.493	41.81	18	27	109.037	37.6	16	27	56.6602	26.21	12	15	641	70.009	5.65576
P34932	Heat shock 70 kDa protein 4 OS=Homo sapiens OX=9606 GN=HSPA4 PE=1 SV=4 - [HSP74_HUMAN]	28.57	1	16	16	44	9.45993e+06	2.36828e+06	2.00441e+07	3.85959e+06	6.3763e+06	2.94933e+06	0	62.59	28.57	14	15	12.238	5.95	3	3	21.8643	9.29	5	5	34.641	13.21	7	8	58.5673	23.33	12	13		0				0			840	94.2712	5.18604
P11142	Heat shock cognate 71 kDa protein OS=Homo sapiens OX=9606 GN=HSPA8 PE=1 SV=1 - [HSP7C_HUMAN]	49.07	1	21	30	316	1.67426e+08	8.64512e+07	2.34504e+08	1.08653e+08	9.70039e+07	5.09502e+07	1.83419e+07	187.477	47.52	24	50	186.038	48.61	28	50	169.294	47.52	24	46	186.67	45.2	26	51	218.895	48.3	27	58	130.774	41.02	23	39	76.6054	38.39	18	22	646	70.8542	5.51611
Q92598	Heat shock protein 105 kDa OS=Homo sapiens OX=9606 GN=HSPH1 PE=1 SV=1 - [HS105_HUMAN]	7.81	1	5	5	7	5.01905e+06	0	0	1.49372e+06	4.21955e+06	0	0		0				0				0			7.38526	2.8	2	2	15.1809	6.18	4	4		0				0			858	96.8037	5.38916
P04792	Heat shock protein beta-1 OS=Homo sapiens OX=9606 GN=HSPB1 PE=1 SV=2 - [HSPB1_HUMAN]	86.83	1	14	14	170	2.03255e+08	6.19186e+07	4.25451e+08	1.57536e+08	6.84508e+07	3.15654e+07	1.23844e+07	116.386	86.83	12	36	76.0132	78.54	11	25	165.123	78.54	13	49	106.665	78.54	11	31	46.8116	54.63	8	14	34.0942	48.29	6	8	21.9842	48.29	6	7	205	22.7685	6.40479
P07900	Heat shock protein HSP 90-alpha OS=Homo sapiens OX=9606 GN=HSP90AA1 PE=1 SV=5 - [HS90A_HUMAN]	49.86	1	17	29	224	9.83296e+07	5.35601e+07	1.33611e+08	5.07731e+07	6.31266e+07	4.09358e+07	1.18146e+07	176.465	40.71	23	47	127.889	38.11	21	37	81.9568	31.01	20	28	105.025	36.48	22	29	125.547	39.07	21	36	101.963	31.15	18	28	70.8083	28.42	14	19	732	84.6067	5.021
P08238	Heat shock protein HSP 90-beta OS=Homo sapiens OX=9606 GN=HSP90AB1 PE=1 SV=4 - [HS90B_HUMAN]	51.93	1	19	33	210	9.83296e+07	5.35601e+07	1.33611e+08	5.07731e+07	6.31266e+07	4.20966e+07	1.18146e+07	158.256	43.51	25	45	114.338	41.02	23	34	110.838	43.78	27	37	103.426	39.23	23	29	92.3622	29.42	18	28	86.0254	29.7	18	25	40.6964	20.58	10	12	724	83.2121	5.03369
P54652	Heat shock-related 70 kDa protein 2 OS=Homo sapiens OX=9606 GN=HSPA2 PE=1 SV=1 - [HSP72_HUMAN]	41.47	1	12	21	171	1.67426e+08	8.27787e+07	2.34504e+08	1.08653e+08	9.70039e+07	4.99546e+07	1.83419e+07	105.845	32.55	16	29	100.554	31.77	17	29	80.9608	29.89	15	24	98.8988	35.99	18	29	110.241	36.31	19	31		0			43.659	19.87	11	14	639	69.9779	5.74463
P30519	Heme oxygenase 2 OS=Homo sapiens OX=9606 GN=HMOX2 PE=1 SV=2 - [HMOX2_HUMAN]	10.13	1	2	2	2	0	0	4.11866e+06	0	1.90851e+06	0	0						0				0				0			5.31074	10.13	2	2		0				0			316	36.0098	5.41455
Q9NRV9	Heme-binding protein 1 OS=Homo sapiens OX=9606 GN=HEBP1 PE=1 SV=1 - [HEBP1_HUMAN]	25.4	1	3	3	10	3.72318e+06	2.29505e+06	5.75345e+07	3.20057e+06	6.29978e+06	3.33304e+06	0	5.96965	16.4	2	2	6.33499	16.4	2	2	8.01766	17.46	2	2	7.18535	16.4	2	2	6.8404	16.4	2	2		0				0			189	21.0835	5.79541
Q9Y5Z4	Heme-binding protein 2 OS=Homo sapiens OX=9606 GN=HEBP2 PE=1 SV=1 - [HEBP2_HUMAN]	18.05	1	3	3	5	6.10658e+06	0	7.69529e+06	2.82203e+06	1.71316e+06	1.48087e+06	0		0							11.3539	18.05	3	3	8.61319	13.66	2	2		0				0				0			205	22.8612	4.62744
P69905	Hemoglobin subunit alpha OS=Homo sapiens OX=9606 GN=HBA1 PE=1 SV=2 - [HBA_HUMAN]	88.73	1	11	11	3246	7.02122e+09	8.94748e+09	8.11477e+09	6.0943e+09	5.37448e+09	8.79492e+09	1.11012e+09	1619.46	83.8	8	568	2270.28	85.21	10	737	486.273	83.8	8	165	1538.06	83.8	9	503	718.933	83.8	8	260	2255.04	88.73	10	803	619.294	83.8	8	210	142	15.2479	8.67529
P68871	Hemoglobin subunit beta OS=Homo sapiens OX=9606 GN=HBB PE=1 SV=2 - [HBB_HUMAN]	89.8	1	11	17	2789	8.97349e+09	1.10549e+10	9.71927e+09	7.38453e+09	7.22755e+09	9.32913e+09	1.09503e+09	1396.03	89.8	15	449	1615.47	89.8	15	553	651.24	89.8	14	227	1383.6	89.8	16	498	1128.12	88.44	14	386	1672.01	89.8	14	582	283.231	89.8	13	94	147	15.9883	7.28369
P02042	Hemoglobin subunit delta OS=Homo sapiens OX=9606 GN=HBD PE=1 SV=2 - [HBD_HUMAN]	89.8	1	8	14	1475	7.12168e+09	8.40662e+09	6.82427e+09	5.79787e+09	5.79376e+09	6.82071e+09	8.91529e+08	532.5	83.67	13	228	607.486	89.8	14	279	303.989	87.07	13	122	517.105	83.67	13	258	483.28	85.71	12	213	694.199	83.67	13	327	127.634	80.95	12	48	147	16.0453	8.04541
P69891	Hemoglobin subunit gamma-1 OS=Homo sapiens OX=9606 GN=HBG1 PE=1 SV=2 - [HBG1_HUMAN]	73.47	1	3	11	657	3.18406e+09	3.68744e+09	4.35835e+09	2.58098e+09	2.55055e+09	3.19978e+09	5.76808e+08	292.33	51.7	6	109		0				0			299.201	44.9	5	116		0			416.368	66.67	8	157		0			147	16.1303	7.1958
P69892	Hemoglobin subunit gamma-2 OS=Homo sapiens OX=9606 GN=HBG2 PE=1 SV=2 - [HBG2_HUMAN]	73.47	1	3	11	656	3.18299e+09	3.68744e+09	4.35835e+09	2.57869e+09	2.55055e+09	3.19978e+09	5.76808e+08		0			296.19	51.7	6	111		0				0			301.686	73.47	11	114		0				0			147	16.1163	7.1958
P02790	Hemopexin OS=Homo sapiens OX=9606 GN=HPX PE=1 SV=2 - [HEMO_HUMAN]	61.26	1	22	22	166	1.20368e+08	4.7274e+07	9.20612e+07	5.4126e+07	2.68308e+07	6.7949e+07	2.53504e+08	91.2238	42.86	14	25	47.7563	30.52	10	14	31.8403	28.57	8	10	57.372	38.96	11	16	31.2301	28.79	8	9	82.2168	38.96	11	21	247.566	61.26	22	71	462	51.6433	7.02002
P05546	Heparin cofactor 2 OS=Homo sapiens OX=9606 GN=SERPIND1 PE=1 SV=3 - [HEP2_HUMAN]	19.24	1	6	6	6	0	0	0	0	0	4.33142e+06	5.74653e+06		0				0				0				0				0				0			15.3953	19.24	6	6	499	57.0342	6.90283
Q14CZ8	Hepatocyte cell adhesion molecule OS=Homo sapiens OX=9606 GN=HEPACAM PE=1 SV=1 - [HECAM_HUMAN]	28.37	1	7	7	26	3.71964e+06	9.07387e+06	0	6.4378e+06	3.93328e+07	0	1.55697e+07		0			15.4475	14.66	3	5		0				0			28.634	20.91	5	9		0			32.3729	28.37	7	12	416	45.9981	9.11475
O14964	Hepatocyte growth factor-regulated tyrosine kinase substrate OS=Homo sapiens OX=9606 GN=HGS PE=1 SV=1 - [HGS_HUMAN]	2.96	1	2	2	2	0	0	0	995365	1.56555e+06	0	0		0				0				0				0			5.60981	2.96	2	2		0				0			777	86.1376	6.16357
P51858	Hepatoma-derived growth factor OS=Homo sapiens OX=9606 GN=HDGF PE=1 SV=1 - [HDGF_HUMAN]	42.92	1	6	6	21	24096946	4.97242e+06	1.46649e+07	4.18626e+06	0	4.34983e+06	0	17.5171	42.92	5	6	2.43344	22.5	3	3	20.9883	31.67	5	6	7.23906	22.5	3	3		0			6.62739	22.5	3	3		0			240	26.7719	4.729
Q5SSJ5	Heterochromatin protein 1-binding protein 3 OS=Homo sapiens OX=9606 GN=HP1BP3 PE=1 SV=1 - [HP1B3_HUMAN]	13.56	1	7	7	11	7.66294e+06	2.6432e+06	1.17149e+07	0	6.53438e+06	1.46937e+06	0	14.0849	10.13	5	5	5.4571	3.44	2	2		0				0			6.49743	7.05	3	4		0				0			553	61.1693	9.67139
Q99729	Heterogeneous nuclear ribonucleoprotein A/B OS=Homo sapiens OX=9606 GN=HNRNPAB PE=1 SV=2 - [ROAA_HUMAN]	20.78	1	4	5	10	1.1827e+07	7.29172e+06	1.87883e+07	5.92493e+06	9.18515e+06	4.64014e+06	0	14.0552	16.87	4	4		0				0			7.00397	6.93	2	2		0				0				0			332	36.2024	8.20654
Q13151	Heterogeneous nuclear ribonucleoprotein A0 OS=Homo sapiens OX=9606 GN=HNRNPA0 PE=1 SV=1 - [ROA0_HUMAN]	16.72	1	3	3	5	9.84227e+06	0	7.86743e+06	3.33743e+06	2.79034e+06	0	0	10.324	16.72	3	3		0				0			7.02942	11.8	2	2		0				0				0			305	30.8218	9.29053
P09651	Heterogeneous nuclear ribonucleoprotein A1 OS=Homo sapiens OX=9606 GN=HNRNPA1 PE=1 SV=5 - [ROA1_HUMAN]	47.04	1	15	17	93	5.78425e+07	1.71983e+07	4.64356e+07	1.90057e+07	1.07523e+07	9.99585e+06	1.67527e+06	68.3068	47.04	16	27	17.6333	28.23	8	8	61.026	37.9	12	23	40.737	35.48	11	17	23.3888	25.81	6	6	33.8085	26.61	8	10	3.60963	10.48	2	2	372	38.7231	9.12939
P51991	Heterogeneous nuclear ribonucleoprotein A3 OS=Homo sapiens OX=9606 GN=HNRNPA3 PE=1 SV=2 - [ROA3_HUMAN]	41.01	1	16	16	56	3.93666e+07	8.92874e+06	53300841	1.38196e+07	1.36647e+07	1.0365e+07	0	50.4744	37.57	14	15	20.2669	23.54	7	7	33.476	29.63	10	13	18.4006	25.4	7	7	18.7422	24.07	7	7	18.9079	19.58	7	7		0			378	39.5706	9.01221
Q14103	Heterogeneous nuclear ribonucleoprotein D0 OS=Homo sapiens OX=9606 GN=HNRNPD PE=1 SV=1 - [HNRPD_HUMAN]	27.04	1	7	8	29	3.74372e+07	7.97129e+06	1.62013e+07	1.61746e+07	1.29975e+07	9.08995e+06	1.51728e+06	27.6311	21.13	7	9	12.1735	11.83	3	4	6.48947	11.27	3	3	11.6133	15.49	4	5	15.757	17.75	4	5	7.3921	10.42	3	3		0			355	38.4103	7.81104
O14979	Heterogeneous nuclear ribonucleoprotein D-like OS=Homo sapiens OX=9606 GN=HNRNPDL PE=1 SV=3 - [HNRDL_HUMAN]	9.29	1	3	4	12	1.24555e+07	5.27582e+06	2.1942e+07	7.03989e+06	6.31465e+06	4.64014e+06	0	9.9232	9.29	3	3	2.74408	5.48	2	2	8.633	9.29	3	3		0			9.20802	5.95	2	3		0				0			420	46.4091	9.56885
P52597	Heterogeneous nuclear ribonucleoprotein F OS=Homo sapiens OX=9606 GN=HNRNPF PE=1 SV=3 - [HNRPF_HUMAN]	23.13	1	4	6	25	1.13722e+07	2.84038e+06	1.93551e+07	3.24519e+06	2.3062e+06	3.47841e+06	0	43.9345	23.13	6	10		0				0				0				0				0				0			415	45.6429	5.57959
P31943	Heterogeneous nuclear ribonucleoprotein H OS=Homo sapiens OX=9606 GN=HNRNPH1 PE=1 SV=4 - [HNRH1_HUMAN]	30.07	1	4	9	49	2.55939e+07	5.59451e+06	3.94819e+07	9.5806e+06	5.82233e+06	6.96976e+06	0	57.2361	22.94	7	13	21.4024	13.81	4	5	56.8375	30.07	9	15	27.0685	16.26	5	6		0			29.6108	21.16	6	8		0			449	49.1984	6.30322
P55795	Heterogeneous nuclear ribonucleoprotein H2 OS=Homo sapiens OX=9606 GN=HNRNPH2 PE=1 SV=1 - [HNRH2_HUMAN]	23.39	1	3	7	31	2.222e+07	4.77032e+06	3.6933e+07	9.39994e+06	5.89711e+06	1.23065e+07	0	38.4632	19.15	6	9		0			36.3007	23.39	7	10		0			20.8736	14.03	4	5		0				0			449	49.2323	6.30322
P31942	Heterogeneous nuclear ribonucleoprotein H3 OS=Homo sapiens OX=9606 GN=HNRNPH3 PE=1 SV=2 - [HNRH3_HUMAN]	8.38	1	2	2	3	4.78045e+06	2.09724e+06	1.50094e+07	3.10277e+06	2.70418e+06	3.22093e+06	0		0				0				0				0				0			13.1452	8.38	2	3		0			346	36.9031	6.87354
P61978	Heterogeneous nuclear ribonucleoprotein K OS=Homo sapiens OX=9606 GN=HNRNPK PE=1 SV=1 - [HNRPK_HUMAN]	44.49	1	16	16	93	4.61632e+07	1.59678e+07	4.24001e+07	1.73779e+07	1.50852e+07	1.34509e+07	1.45266e+06	86.9516	42.55	14	24	52.4435	30.67	11	14	52.0506	31.97	11	15	59.6178	40.39	12	16	40.8964	30.02	10	11	48.7985	29.81	10	13		0			463	50.9444	5.5415
P14866	Heterogeneous nuclear ribonucleoprotein L OS=Homo sapiens OX=9606 GN=HNRNPL PE=1 SV=2 - [HNRPL_HUMAN]	38.37	1	12	12	51	2.55035e+07	7.30054e+06	3.47825e+07	7.83827e+06	7.69903e+06	7.77132e+06	0	49.7644	28.69	9	12	26.497	16.47	5	6	46.0212	30.22	8	11	30.4849	21.9	7	7	30.3476	19.52	6	7	31.7471	22.58	8	8		0			589	64.0924	8.22119
P52272	Heterogeneous nuclear ribonucleoprotein M OS=Homo sapiens OX=9606 GN=HNRNPM PE=1 SV=3 - [HNRPM_HUMAN]	21.37	1	13	13	33	1.66286e+07	2.22705e+06	2.66976e+07	4.52049e+06	3.32069e+06	2.44772e+06	0	34.2398	16.16	9	11	15.0767	5.21	2	4	32.7568	17.67	9	10	9.65155	5.62	3	3	6.28421	3.01	2	2	10.2024	4.66	2	3		0			730	77.4643	8.70459
O60506	Heterogeneous nuclear ribonucleoprotein Q OS=Homo sapiens OX=9606 GN=SYNCRIP PE=1 SV=2 - [HNRPQ_HUMAN]	13.96	1	5	6	24	8.06872e+06	3.7113e+06	1.06838e+07	4.5522e+06	3.79455e+06	4.26241e+06	0	19.9967	12.04	5	6	14.5893	9.15	4	4	14.8127	8.99	4	4	13.282	7.54	4	4	9.15919	5.62	3	3	10.6104	5.78	3	3		0			623	69.5596	8.5874
O43390	Heterogeneous nuclear ribonucleoprotein R OS=Homo sapiens OX=9606 GN=HNRNPR PE=1 SV=1 - [HNRPR_HUMAN]	7.42	1	3	4	11	8.88121e+06	4.02011e+06	1.00088e+07	4.30884e+06	5.1039e+06	3.93593e+06	0	8.52777	5.53	3	3		0				0				0			7.99939	5.53	3	3		0				0			633	70.8993	8.1333
Q00839	Heterogeneous nuclear ribonucleoprotein U OS=Homo sapiens OX=9606 GN=HNRNPU PE=1 SV=6 - [HNRPU_HUMAN]	24.73	1	11	11	43	2.77153e+07	1.14606e+07	4.60659e+07	9.91833e+06	1.08338e+07	6.25886e+06	0	52.0584	17.82	9	12	32.2058	15.88	7	8	27.3394	12	6	7	29.7845	12.36	6	7	23.6558	7.52	4	5	20.307	5.94	3	4		0			825	90.528	5.99854
Q9BUJ2	Heterogeneous nuclear ribonucleoprotein U-like protein 1 OS=Homo sapiens OX=9606 GN=HNRNPUL1 PE=1 SV=2 - [HNRL1_HUMAN]	7.36	1	4	4	4	4.02389e+06	0	5.91244e+06	0	0	0	0	14.0985	7.36	4	4		0				0				0				0				0				0			856	95.6793	6.91748
Q1KMD3	Heterogeneous nuclear ribonucleoprotein U-like protein 2 OS=Homo sapiens OX=9606 GN=HNRNPUL2 PE=1 SV=1 - [HNRL2_HUMAN]	17.4	1	10	10	17	6.97781e+06	2.05289e+06	1.31368e+07	4.67705e+06	1.15506e+06	6.99678e+06	0	23.5552	13.65	6	6	6.86506	4.28	2	2	23.1816	11.24	7	7		0				0			6.88478	3.08	2	2		0			747	85.0522	4.90674
P22626	Heterogeneous nuclear ribonucleoproteins A2/B1 OS=Homo sapiens OX=9606 GN=HNRNPA2B1 PE=1 SV=2 - [ROA2_HUMAN]	57.79	1	16	18	105	3.58139e+07	1.19303e+07	5.4947e+07	1.42961e+07	2.63978e+07	8.95851e+06	671505	90.5816	57.79	16	31	25.8921	35.98	10	13	57.519	42.49	13	23	48.5505	38.24	10	18	28.2944	17.85	5	9	17.7246	24.08	7	9	2.29268	7.93	2	2	353	37.4067	8.95361
P07910	Heterogeneous nuclear ribonucleoproteins C1/C2 OS=Homo sapiens OX=9606 GN=HNRNPC PE=1 SV=4 - [HNRPC_HUMAN]	29.74	1	8	8	32	4.28185e+07	1.03015e+07	6.04477e+07	1.68394e+07	1.24088e+07	1.04525e+07	1.4849e+06	30.1953	20.26	6	8	17.3822	18.95	5	5	17.7825	21.57	6	6	12.8339	11.11	3	4	11.1437	11.11	3	3	13.6623	10.78	3	4	7.00826	7.52	2	2	306	33.6495	5.08447
P19367	Hexokinase-1 OS=Homo sapiens OX=9606 GN=HK1 PE=1 SV=3 - [HXK1_HUMAN]	33.37	1	25	25	84	5.22856e+06	5.11817e+06	3.67515e+07	8.91803e+06	2.02122e+07	3.85046e+06	0	20.5206	11.23	7	7	35.9911	14.07	8	9	63.9224	23.12	15	19	67.2417	20.72	16	18	87.2073	25.85	20	24	24.7108	11.12	7	7		0			917	102.42	6.80029
P09429	High mobility group protein B1 OS=Homo sapiens OX=9606 GN=HMGB1 PE=1 SV=3 - [HMGB1_HUMAN]	33.49	1	10	10	44	4.31325e+07	1.25142e+07	3.0248e+07	3.64438e+06	2.68285e+07	8.01198e+06	0	42.9265	33.49	9	14	25.9987	28.84	6	7	22.4099	22.79	5	7	8.15042	15.35	2	2	38.8146	22.79	6	10	11.5175	14.88	4	4		0			215	24.8782	5.74463
P26583	High mobility group protein B2 OS=Homo sapiens OX=9606 GN=HMGB2 PE=1 SV=2 - [HMGB2_HUMAN]	17.22	1	3	3	5	1.59207e+07	4.04772e+06	5.28356e+06	0	5.39117e+06	2.28519e+06	0		0				0				0				0			4.91719	11.48	2	2		0				0			209	24.0187	7.81104
P37235	Hippocalcin-like protein 1 OS=Homo sapiens OX=9606 GN=HPCAL1 PE=1 SV=3 - [HPCL1_HUMAN]	31.61	1	5	5	6	0	0	0	0	8.27415e+06	0	0		0				0				0				0			20.5671	31.61	5	6		0				0			193	22.299	5.35107
Q9UM19	Hippocalcin-like protein 4 OS=Homo sapiens OX=9606 GN=HPCAL4 PE=1 SV=3 - [HPCL4_HUMAN]	23.56	1	2	4	6	0	0	0	0	4.9029e+06	0	0		0								0				0			19.8213	23.56	4	6		0							191	22.188	4.89404
P50135	Histamine N-methyltransferase OS=Homo sapiens OX=9606 GN=HNMT PE=1 SV=1 - [HNMT_HUMAN]	14.04	1	2	2	7	3.58337e+06	5.46058e+06	0	3.94388e+06	5.16342e+06	0	0	6.82489	14.04	2	2		0				0			11.579	14.04	2	3	7.71263	14.04	2	2									292	33.2736	5.33838
P49773	Histidine triad nucleotide-binding protein 1 OS=Homo sapiens OX=9606 GN=HINT1 PE=1 SV=2 - [HINT1_HUMAN]	73.02	1	5	5	22	1.05411e+07	1.56372e+07	2.11368e+07	1.55313e+07	2.28849e+07	4.18929e+06	3.61573e+06	11.8134	46.03	3	4	16.9429	46.03	3	7	3.13965	26.98	2	2	9.95672	23.02	2	3	14.5565	65.87	4	6		0				0			126	13.7931	6.94678
Q9NQE9	Histidine triad nucleotide-binding protein 3 OS=Homo sapiens OX=9606 GN=HINT3 PE=1 SV=1 - [HINT3_HUMAN]	31.87	1	4	4	4	0	0	0	0	4.10424e+06	0	0		0				0				0							13.3274	31.87	4	4						0			182	20.3481	6.59521
P04196	Histidine-rich glycoprotein OS=Homo sapiens OX=9606 GN=HRG PE=1 SV=1 - [HRG_HUMAN]	23.81	1	10	10	38	4.69097e+06	3.15312e+06	6.97061e+06	6.7675e+06	1.74887e+06	2.0705e+06	2.19636e+07	8.56885	5.71	2	2	11.5889	7.43	3	3	14.9922	6.48	3	4	21.2393	14.48	5	7	7.49317	4.38	2	2	12.8925	7.43	3	3	53.2598	19.81	9	17	525	59.5409	7.50342
Q13547	Histone deacetylase 1 OS=Homo sapiens OX=9606 GN=HDAC1 PE=1 SV=1 - [HDAC1_HUMAN]	6.43	1	2	2	2	1.56408e+07	0	1.02119e+07	0	0	0	0		0				0			8.49602	6.43	2	2		0				0				0				0			482	55.0677	5.47803
P07305	Histone H1.0 OS=Homo sapiens OX=9606 GN=H1F0 PE=1 SV=3 - [H10_HUMAN]	16.49	1	3	3	4	2.39045e+07	0	0	0	1.11001e+07	288581	0		0				0				0				0			15.0317	16.49	3	4		0				0			194	20.8502	10.8433
P16403	Histone H1.2 OS=Homo sapiens OX=9606 GN=HIST1H1C PE=1 SV=2 - [H12_HUMAN]	17.84	3	7	7	50	1.84546e+08	4.92392e+07	1.1677e+08	3.16635e+07	1.57806e+08	3.79216e+07	9.75357e+06	40.3866	17.84	6	12	22.635	17.37	5	7	29.6415	15.96	5	9	8.73567	10.8	2	3	32.2958	15.96	6	10	26.9704	15.49	4	9		0			213	21.3517	10.9312
P16401	Histone H1.5 OS=Homo sapiens OX=9606 GN=HIST1H1B PE=1 SV=3 - [H15_HUMAN]	10.62	1	3	3	13	6.21175e+07	1.1471e+07	8.33811e+07	5.99431e+06	2.24054e+07	1.22767e+07	694909	22.6969	10.62	3	7	6.15969	10.18	2	2		0				0			11.6958	10.18	2	4		0				0			226	22.5665	10.9165
P04908	Histone H2A type 1-B/E OS=Homo sapiens OX=9606 GN=HIST1H2AB PE=1 SV=2 - [H2A1B_HUMAN]	35.38	3	1	4	51	1.27334e+08	9.34063e+07	2.66784e+08	1.71505e+08	2.60244e+08	8.90283e+07	2.25354e+07	31.884	35.38	4	9	37.4263	35.38	4	11		0				0			39.6936	30	3	10	25.5709	30	3	8		0			130	14.127	11.0483
Q96KK5	Histone H2A type 1-H OS=Homo sapiens OX=9606 GN=HIST1H2AH PE=1 SV=3 - [H2A1H_HUMAN]	35.94	7	2	5	56	1.27334e+08	9.8846e+07	2.96672e+08	1.80313e+08	2.6396e+08	9.31636e+07	1.61808e+07		0			35.7958	35.94	5	12	19.9697	21.09	3	6	34.5634	30.47	3	10		0				0			16.6027	30.47	3	5	128	13.8978	10.8872
P0C0S5	Histone H2A.Z OS=Homo sapiens OX=9606 GN=H2AFZ PE=1 SV=2 - [H2AZ_HUMAN]	25.78	2	2	3	28	1.04404e+08	7.87278e+07	3.98041e+08	1.63602e+08	2.62184e+08	1.31123e+08	3.91887e+07	14.4277	25.78	3	5	12.9135	25.78	3	5		0			8.22602	25.78	3	3	15.5558	25.78	3	6		0				0			128	13.5446	10.5796
O60814	Histone H2B type 1-K OS=Homo sapiens OX=9606 GN=HIST1H2BK PE=1 SV=3 - [H2B1K_HUMAN]	35.71	14	5	5	80	2.69935e+08	1.9738e+08	1.91096e+08	2.14032e+08	2.94853e+08	8.82279e+07	2.47881e+07	63.2468	26.98	4	14	41.3262	19.05	2	9	48.237	20.63	2	10	62.6481	26.19	3	13	69.8839	26.98	4	17	55.4092	26.98	3	13	18.5797	19.05	2	4	126	13.8816	10.3159
P84243	Histone H3.3 OS=Homo sapiens OX=9606 GN=H3F3A PE=1 SV=2 - [H33_HUMAN]	57.35	4	5	5	13	5.05683e+07	5.37366e+06	5.08672e+07	1.91734e+07	2.01588e+07	0	0	13.3028	33.82	4	5		0			24.003	31.62	2	6	5.8268	14.71	2	2		0				0				0			136	15.3185	11.2681
P62805	Histone H4 OS=Homo sapiens OX=9606 GN=HIST1H4A PE=1 SV=2 - [H4_HUMAN]	61.17	1	12	12	126	2.27225e+08	8.64173e+07	3.4041e+08	1.7566e+08	2.22873e+08	7.43406e+07	1.94734e+07	46.1407	60.19	9	22	52.9195	56.31	7	20	50.0815	51.46	6	18	66.114	57.28	9	25	60.0286	48.54	7	23	31.7819	46.6	6	14	8.14694	24.27	3	4	103	11.3604	11.356
Q09028	Histone-binding protein RBBP4 OS=Homo sapiens OX=9606 GN=RBBP4 PE=1 SV=3 - [RBBP4_HUMAN]	22.12	1	5	5	11	1.61596e+07	5.25391e+06	1.43321e+07	0	0	1.40642e+07	0	7.81269	18.35	3	4	6.40431	13.18	2	2	12.2979	10.12	2	3						0			8.14176	9.41	2	2		0			425	47.6261	4.89404
P01892	HLA class I histocompatibility antigen, A-2 alpha chain OS=Homo sapiens OX=9606 GN=HLA-A PE=1 SV=1 - [1A02_HUMAN]	46.03	1	3	11	42	1.53587e+07	1.16865e+07	4.30736e+07	1.87275e+07	1.71702e+07	2.97196e+07	980892		0				0				0				0				0			48.7086	46.03	11	14		0			365	40.8962	6.99072
P04439	HLA class I histocompatibility antigen, A-3 alpha chain OS=Homo sapiens OX=9606 GN=HLA-A PE=1 SV=2 - [1A03_HUMAN]	48.22	3	4	11	42	1.64508e+07	1.33149e+07	4.59173e+07	1.89902e+07	1.52257e+07	3.31581e+07	980892		0				0				0			21.8044	33.42	7	8		0			43.9186	43.56	10	13		0			365	40.8152	5.99854
P10314	HLA class I histocompatibility antigen, A-32 alpha chain OS=Homo sapiens OX=9606 GN=HLA-A PE=1 SV=2 - [1A32_HUMAN]	38.08	2	2	9	37	1.53587e+07	1.16865e+07	4.30736e+07	1.87275e+07	1.71702e+07	2.97196e+07	980892		0				0			23.4713	31.23	7	9		0				0				0				0			365	41.0222	6.46826
P01891	HLA class I histocompatibility antigen, A-68 alpha chain OS=Homo sapiens OX=9606 GN=HLA-A PE=1 SV=4 - [1A68_HUMAN]	39.45	1	1	9	42	1.53587e+07	1.16865e+07	4.30736e+07	1.87275e+07	1.71702e+07	2.97196e+07	980892		0			21.3004	28.77	6	6		0				0			17.1106	21.92	5	5		0				0			365	40.8831	6.69775
P30464	HLA class I histocompatibility antigen, B-15 alpha chain OS=Homo sapiens OX=9606 GN=HLA-B PE=1 SV=2 - [1B15_HUMAN]	40.06	11	2	9	42	1.34987e+07	1.20156e+07	3.66207e+07	1.50916e+07	1.11901e+07	2.32677e+07	2.36452e+06		0			26.7097	30.11	6	9		0				0				0				0			4.57488	8.56	2	2	362	40.363	6.30322
P18463	HLA class I histocompatibility antigen, B-37 alpha chain OS=Homo sapiens OX=9606 GN=HLA-B PE=1 SV=1 - [1B37_HUMAN]	33.98	13	2	9	44	1.34987e+07	1.20156e+07	3.66207e+07	1.50916e+07	1.31346e+07	2.38546e+07	2.36452e+06	23.6691	27.9	7	8		0				0				0				0				0			4.57488	8.56	2	2	362	40.4311	6.15088
Q04826	HLA class I histocompatibility antigen, B-40 alpha chain OS=Homo sapiens OX=9606 GN=HLA-B PE=1 SV=1 - [1B40_HUMAN]	30.66	8	2	8	40	1.34987e+07	1.20156e+07	3.66207e+07	1.50916e+07	1.05632e+07	2.32677e+07	2.36452e+06		0				0				0				0				0				0			4.57488	8.56	2	2	362	40.4801	6.53662
P30479	HLA class I histocompatibility antigen, B-41 alpha chain OS=Homo sapiens OX=9606 GN=HLA-B PE=1 SV=1 - [1B41_HUMAN]	30.94	1	2	8	41	1.34987e+07	1.20156e+07	3.66207e+07	1.50916e+07	1.31346e+07	2.38546e+07	3.74815e+06		0				0			29.3486	30.94	8	9		0				0				0				0			362	40.5141	6.53662
P30491	HLA class I histocompatibility antigen, B-53 alpha chain OS=Homo sapiens OX=9606 GN=HLA-B PE=1 SV=1 - [1B53_HUMAN]	38.4	3	1	8	41	1.34987e+07	1.20156e+07	3.66207e+07	1.50916e+07	1.11901e+07	2.32677e+07	2.36452e+06		0			26.7097	30.11	6	9		0				0				0				0			4.57488	8.56	2	2	362	40.4702	6.45557
P30493	HLA class I histocompatibility antigen, B-55 alpha chain OS=Homo sapiens OX=9606 GN=HLA-B PE=1 SV=1 - [1B55_HUMAN]	32.32	5	1	8	45	1.34987e+07	1.20156e+07	3.66207e+07	1.50916e+07	1.31346e+07	2.38546e+07	2.36452e+06		0				0				0			25.163	24.86	6	7	17.7438	20.99	5	5		0			4.57488	8.56	2	2	362	40.471	5.98584
P30460	HLA class I histocompatibility antigen, B-8 alpha chain OS=Homo sapiens OX=9606 GN=HLA-B PE=1 SV=1 - [1B08_HUMAN]	33.15	3	1	8	41	1.34987e+07	1.20156e+07	3.66207e+07	1.50916e+07	1.31346e+07	2.38546e+07	3.74815e+06	23.6691	24.86	6	7		0				0				0				0				0				0			362	40.3058	5.70654
P30508	HLA class I histocompatibility antigen, Cw-12 alpha chain OS=Homo sapiens OX=9606 GN=HLA-C PE=1 SV=2 - [1C12_HUMAN]	33.33	1	2	8	34	1.50299e+07	1.24758e+07	4.50646e+07	1.84011e+07	1.63666e+07	3.37451e+07	980892		0				0				0				0				0			42.7775	33.33	8	12		0			366	40.8601	6.30322
P04233	HLA class II histocompatibility antigen gamma chain OS=Homo sapiens OX=9606 GN=CD74 PE=1 SV=3 - [HG2A_HUMAN]	16.55	1	3	3	3	3.21924e+06	0	1.15448e+06	3.09124e+06	0	3.23842e+06	0		0				0				0				0				0			11.5874	16.55	3	3		0			296	33.4937	8.44092
P20036	HLA class II histocompatibility antigen, DP alpha 1 chain OS=Homo sapiens OX=9606 GN=HLA-DPA1 PE=1 SV=1 - [DPA1_HUMAN]	11.15	1	2	2	8	3.9365e+06	3.07203e+06	1.4987e+07	7.25283e+06	0	7.14372e+06	0	8.34241	11.15	2	2		0			9.02889	11.15	2	2	8.82996	11.15	2	2					8.97645	11.15	2	2					260	29.3619	5.21143
P04440	HLA class II histocompatibility antigen, DP beta 1 chain OS=Homo sapiens OX=9606 GN=HLA-DPB1 PE=1 SV=1 - [DPB1_HUMAN]	19.38	1	3	4	8	1.02253e+07	6.1051e+06	2.04745e+07	1.24115e+07	5.16871e+06	7.94739e+06	0		0				0				0				0				0			10.9077	19.38	4	4					258	29.1408	8.57275
P01903	HLA class II histocompatibility antigen, DR alpha chain OS=Homo sapiens OX=9606 GN=HLA-DRA PE=1 SV=1 - [DRA_HUMAN]	29.53	1	6	6	37	1.3618e+07	1.94238e+07	7.79974e+07	2.02768e+07	1.0527e+07	2.40467e+07	1.87645e+06	21.7012	25.2	5	6	28.173	25.2	5	6	32.199	29.53	6	9	25.1934	25.2	5	6	11.0302	15.75	3	3	27.5297	24.8	5	7		0			254	28.5887	4.99561
P04229	HLA class II histocompatibility antigen, DRB1-1 beta chain OS=Homo sapiens OX=9606 GN=HLA-DRB1 PE=1 SV=2 - [2B11_HUMAN]	36.47	1	1	6	27	1.51392e+07	1.33398e+07	4.47093e+07	2.70734e+07	1.46665e+07	2.80352e+07	0		0				0				0			17.9873	36.47	5	5		0				0							266	29.895	7.69385
P20039	HLA class II histocompatibility antigen, DRB1-11 beta chain OS=Homo sapiens OX=9606 GN=HLA-DRB1 PE=1 SV=1 - [2B1B_HUMAN]	38.72	1	2	7	31	1.20025e+07	7.01463e+06	3.06674e+07	2.37457e+07	9.72073e+06	2.78254e+07	0	28.1904	36.47	6	8		0				0			17.2725	38.72	6	6		0			33.0861	30.08	5	9					266	30.141	7.18115
P01911	HLA class II histocompatibility antigen, DRB1-15 beta chain OS=Homo sapiens OX=9606 GN=HLA-DRB1 PE=1 SV=2 - [2B1F_HUMAN]	32.71	3	1	5	19	1.34047e+07	1.43009e+07	2.04745e+07	2.70734e+07	1.46665e+07	1.7932e+07	0		0			15.6309	23.31	4	4		0				0			14.5448	27.82	4	4		0				0			266	29.947	7.73779
P13760	HLA class II histocompatibility antigen, DRB1-4 beta chain OS=Homo sapiens OX=9606 GN=HLA-DRB1 PE=1 SV=1 - [2B14_HUMAN]	40.98	1	4	7	24	1.75322e+07	2.03872e+07	4.24698e+07	1.61303e+07	2.00059e+07	2.76663e+07	0		0			18.068	32.71	5	5	21.293	34.59	6	8		0				0				0							266	30.093	7.18115
Q30134	HLA class II histocompatibility antigen, DRB1-8 beta chain OS=Homo sapiens OX=9606 GN=HLA-DRB1 PE=1 SV=2 - [2B18_HUMAN]	37.22	1	2	6	24	1.01632e+07	3.38577e+06	5.76931e+07	1.53118e+07	9.9423e+06	3.22225e+07	0		0				0				0				0				0			40.504	37.22	6	11					266	29.9849	7.12256
P50502	Hsc70-interacting protein OS=Homo sapiens OX=9606 GN=ST13 PE=1 SV=2 - [F10A1_HUMAN]	21.14	2	6	6	30	2.16229e+07	1.15278e+07	16038078	7.12503e+06	1.70319e+07	8.73597e+06	3.24131e+06	16.4463	21.14	6	6	13.8495	13.28	4	4		0			11.4723	13.28	4	4	28.0798	21.14	6	8	10.9344	10.57	3	3	15.9933	16.53	5	5	369	41.3055	5.2749
Q16543	Hsp90 co-chaperone Cdc37 OS=Homo sapiens OX=9606 GN=CDC37 PE=1 SV=1 - [CDC37_HUMAN]	24.6	1	6	6	15	5.63428e+06	0	1.21145e+07	2.50023e+06	2.88911e+06	1.67899e+06	0	17.3955	22.22	5	5		0			25.0796	12.43	3	6	5.94573	5.56	2	2	6.00616	7.94	2	2		0				0			378	44.44	5.24951
P10915	Hyaluronan and proteoglycan link protein 1 OS=Homo sapiens OX=9606 GN=HAPLN1 PE=2 SV=2 - [HPLN1_HUMAN]	10.45	1	2	2	2	0	0	0	0	3.02531e+06	0	0		0				0				0				0			7.06519	10.45	2	2		0				0			354	40.14	7.41553
Q14520	Hyaluronan-binding protein 2 OS=Homo sapiens OX=9606 GN=HABP2 PE=1 SV=1 - [HABP2_HUMAN]	4.11	1	2	2	2	0	0	0	2.94428e+06	0	0	0		0				0				0			5.10623	4.11	2	2		0				0				0			560	62.6304	6.53662
Q16836	Hydroxyacyl-coenzyme A dehydrogenase, mitochondrial OS=Homo sapiens OX=9606 GN=HADH PE=1 SV=3 - [HCDH_HUMAN]	38.22	1	7	7	28	1.69389e+07	1.6669e+07	9.37124e+06	7.54907e+06	7.75628e+06	2.6248e+06	0	11.6246	22.93	5	6	25.5319	25.8	5	9	8.88129	10.19	2	3	21.8311	23.57	5	6	8.65635	18.79	4	4		0				0			314	34.2719	8.85107
Q6YN16	Hydroxysteroid dehydrogenase-like protein 2 OS=Homo sapiens OX=9606 GN=HSDL2 PE=1 SV=1 - [HSDL2_HUMAN]	17.46	1	4	4	6	0	3.37252e+06	0	2.30463e+06	4.1895e+06	0	0		0			16.8059	17.46	4	4		0			6.52187	9.57	2	2		0				0				0			418	45.3655	7.98682
P00492	Hypoxanthine-guanine phosphoribosyltransferase OS=Homo sapiens OX=9606 GN=HPRT1 PE=1 SV=2 - [HPRT_HUMAN]	44.95	1	8	8	15	1.92762e+06	1.43997e+06	0	1.28928e+06	8.20974e+06	1.30744e+06	0	9.47428	16.06	3	3		0				0			5.87192	10.55	2	2	28.1191	44.95	8	8	5.94891	10.55	2	2					218	24.5636	6.68311
Q9Y4L1	Hypoxia up-regulated protein 1 OS=Homo sapiens OX=9606 GN=HYOU1 PE=1 SV=1 - [HYOU1_HUMAN]	21.62	1	12	12	30	5.74007e+06	2.10912e+06	1.42072e+07	2.88249e+06	1510689	3.41596e+06	0	30.1829	18.82	10	10	0	3.3	2	2	28.5667	10.71	6	7	22.0123	10.11	5	6	7.17843	3.3	2	2	7.41521	5.51	3	3		0			999	111.266	5.22412
Q9Y6R7	IgGFc-binding protein OS=Homo sapiens OX=9606 GN=FCGBP PE=1 SV=3 - [FCGBP_HUMAN]	3.77	1	7	7	7	0	0	1.79565e+07	0	0	0	2.70101e+06		0				0				0				0				0				0			30.5353	3.77	7	7	5405	571.639	5.33838
P0DOX2	Immunoglobulin alpha-2 heavy chain OS=Homo sapiens OX=9606 PE=1 SV=1 - [IGA2_HUMAN]	25.93	1	3	6	38	2.7459e+07	1.23207e+07	5.17454e+07	3.29781e+07	1.21222e+07	3.46189e+07	9.01426e+07	15.476	7.91	3	4		0				0			28.0585	25.93	6	7		0			32.9677	18.9	5	9	37.2398	25.93	6	13	455	48.9042	6.81494
P0DOX5	Immunoglobulin gamma-1 heavy chain OS=Homo sapiens OX=9606 PE=1 SV=1 - [IGG1_HUMAN]	47.22	2	10	18	499	6.21699e+08	6.0429e+08	6.27813e+08	5.62659e+08	2.61844e+08	1.12876e+09	2.3898e+09	169.616	36.97	13	56	151.156	43.65	13	50	148.854	41.87	12	44	207.423	43.65	15	71	123.452	41.87	12	40	235.979	46.33	16	88	410.396	46.1	16	150	449	49.2992	8.71924
P01876	Immunoglobulin heavy constant alpha 1 OS=Homo sapiens OX=9606 GN=IGHA1 PE=1 SV=2 - [IGHA1_HUMAN]	50.42	1	9	11	137	4.47921e+07	1.87145e+07	5.26756e+07	7.18372e+07	2.06066e+07	6.40685e+07	2.36482e+08	38.3382	38.81	8	11	22.0483	27.48	6	7	31.9306	30.31	7	9	89.1863	47.88	10	24	24.8579	27.76	6	7	93.0856	38.81	9	25	216.091	50.42	11	54	353	37.6306	6.50732
P01880	Immunoglobulin heavy constant delta OS=Homo sapiens OX=9606 GN=IGHD PE=1 SV=3 - [IGHD_HUMAN]	15.89	2	3	3	7	5.01272e+06	0	0	0	0	1.85164e+06	3.02223e+06	9.01256	9.11	2	2		0				0				0				0			8.63852	9.11	2	2	12.7728	15.89	3	3	384	42.3263	8.11865
P01859	Immunoglobulin heavy constant gamma 2 OS=Homo sapiens OX=9606 GN=IGHG2 PE=1 SV=2 - [IGHG2_HUMAN]	43.56	1	5	13	366	2.25056e+08	1.28991e+08	1.42564e+08	1.30071e+08	4.5182e+07	1.93461e+08	6.68268e+08	84.3723	34.05	9	43	71.2065	34.05	9	34	64.2547	41.41	10	27	99.9613	41.41	10	42	51.5006	41.41	10	21	110.647	42.02	10	46	345.833	43.56	13	153	326	35.8778	7.59131
P01860	Immunoglobulin heavy constant gamma 3 OS=Homo sapiens OX=9606 GN=IGHG3 PE=1 SV=2 - [IGHG3_HUMAN]	50.13	1	6	15	403	3.02637e+08	2.44191e+08	2.45498e+08	2.55411e+08	1.1318e+08	3.41681e+08	1.24395e+09	100.538	43.77	12	49	99.5622	43.77	12	43	72.0891	43.24	11	28	147.174	49.07	13	53	56.7649	34.75	9	23	116.768	38.73	11	46	376.317	50.13	15	161	377	41.2604	7.89893
P01861	Immunoglobulin heavy constant gamma 4 OS=Homo sapiens OX=9606 GN=IGHG4 PE=1 SV=1 - [IGHG4_HUMAN]	48.93	1	4	10	198	2.71051e+08	1.72621e+08	1.64298e+08	1.80106e+08	9.38531e+07	2.19081e+08	9.83027e+08	108.173	40.67	9	36	69.3221	35.78	8	23	65.4092	36.09	7	17		0			65.8804	43.12	8	18	109.689	44.04	9	33	152.039	35.47	8	53	327	35.9179	7.35693
P01871	Immunoglobulin heavy constant mu OS=Homo sapiens OX=9606 GN=IGHM PE=1 SV=4 - [IGHM_HUMAN]	43.71	2	14	14	130	4.80793e+07	1.923e+07	6.58699e+07	4.05669e+07	2.03983e+07	1.97701e+07	1.12136e+08	63.6843	21.41	7	18	27.6238	18.98	6	10	53.3541	32.01	9	18	62.5899	32.01	10	19	25.5386	21.41	7	10	47.3487	21.41	7	13	137.167	43.71	14	42	453	49.4086	6.771
A0A0C4DH31	Immunoglobulin heavy variable 1-18 OS=Homo sapiens OX=9606 GN=IGHV1-18 PE=3 SV=1 - [HV118_HUMAN]	23.93	1	2	2	3	3.85821e+06	2.78866e+06	0	0	0	4.75838e+06	1.11992e+07		0				0												0				0			14.5761	23.93	2	3	117	12.8122	8.83643
A0A0C4DH29	Immunoglobulin heavy variable 1-3 OS=Homo sapiens OX=9606 GN=IGHV1-3 PE=3 SV=1 - [HV103_HUMAN]	22.22	1	2	2	5	8605116	3.07754e+06	0	6.33034e+06	0	5740290	1.68082e+07		0				0				0				0								0			19.7357	22.22	2	5	117	12.9994	9.5542
A0A0B4J1V0	Immunoglobulin heavy variable 3-15 OS=Homo sapiens OX=9606 GN=IGHV3-15 PE=3 SV=1 - [HV315_HUMAN]	20.17	1	2	2	2	0	0	0	0	0	0	6.39875e+06		0				0				0				0				0				0			6.96418	20.17	2	2	119	12.9175	8.6167
P01768	Immunoglobulin heavy variable 3-30 OS=Homo sapiens OX=9606 GN=IGHV3-30 PE=1 SV=2 - [HV330_HUMAN]	35.04	1	2	3	7	9.425e+06	9.30252e+06	0	1.02868e+07	2.53395e+06	1.98573e+07	3.86693e+07		0				0				0				0				0				0			24.7797	35.04	3	6	117	12.9384	8.92432
P01772	Immunoglobulin heavy variable 3-33 OS=Homo sapiens OX=9606 GN=IGHV3-33 PE=1 SV=2 - [HV333_HUMAN]	35.04	5	1	3	15	1.46796e+07	1.08116e+07	0	1.69341e+07	5.4147e+06	2.50145e+07	4.70209e+07		0			14.8889	18.8	2	4		0				0				0				0				0			117	13.0655	8.93896
A0A0A0MS15	Immunoglobulin heavy variable 3-49 OS=Homo sapiens OX=9606 GN=IGHV3-49 PE=3 SV=1 - [HV349_HUMAN]	16.81	1	2	2	2	0	0	0	0	0	0	2.74553e+06		0				0				0				0				0				0			6.67281	16.81	2	2	119	13.0475	8.6167
A0A0J9YX35	Immunoglobulin heavy variable 3-64D OS=Homo sapiens OX=9606 GN=IGHV3-64D PE=3 SV=1 - [HV64D_HUMAN]	18.8	1	2	2	2	0	1.88172e+06	0	0	0	686502938	2.57933e+06		0				0								0							5.41665	18.8	2	2		0			117	12.8143	7.85498
P01782	Immunoglobulin heavy variable 3-9 OS=Homo sapiens OX=9606 GN=IGHV3-9 PE=1 SV=2 - [HV309_HUMAN]	34.75	2	3	3	9	0	0	9201924	2.64389e+06	0	3.30884e+06	2.09739e+07						0				0			6.06374	25.42	2	2						0			25.0964	18.64	2	7	118	12.9364	7.07861
P06331	Immunoglobulin heavy variable 4-34 OS=Homo sapiens OX=9606 GN=IGHV4-34 PE=1 SV=2 - [HV434_HUMAN]	37.4	1	3	3	9	0	0	0	4.57216e+06	0	6.43149e+06	1.67584e+07		0				0				0				0								0			31.8963	37.4	3	9	123	13.8061	9.33447
A0A0C4DH38	Immunoglobulin heavy variable 5-51 OS=Homo sapiens OX=9606 GN=IGHV5-51 PE=3 SV=1 - [HV551_HUMAN]	47.01	1	4	4	6	0	0	0	0	0	767761	9.84657e+06						0												0				0			24.7379	47.01	4	6	117	12.6663	8.26514
P01591	Immunoglobulin J chain OS=Homo sapiens OX=9606 GN=JCHAIN PE=1 SV=4 - [IGJ_HUMAN]	25.79	1	3	3	6	4.72816e+06	1.33241e+06	4.97432e+06	3.43286e+06	1.30153e+06	5.50561e+06	9.52529e+06		0				0				0			6.96756	16.98	2	2		0				0			12.7569	25.79	3	4	159	18.087	5.23682
P01834	Immunoglobulin kappa constant OS=Homo sapiens OX=9606 GN=IGKC PE=1 SV=2 - [IGKC_HUMAN]	85.98	1	2	9	393	1.38208e+08	3.244e+08	3.64475e+08	2.66468e+08	1.01955e+08	5.8179e+08	1.12504e+09	181.598	64.49	6	42	219.627	82.24	8	50	141.078	82.24	8	34	218.303	82.24	8	51	125.437	81.31	7	28	298.066	82.24	8	69	507.924	85.98	9	119	107	11.7578	6.52197
P0DOX7	Immunoglobulin kappa light chain OS=Homo sapiens OX=9606 PE=1 SV=1 - [IGK_HUMAN]	56.54	1	3	10	252	1.36214e+08	3.244e+08	3.64475e+08	2.66468e+08	1.01955e+08	5.7243e+08	1.12504e+09		0				0				0				0				0			203.467	54.67	9	45	404.113	51.4	9	91	214	23.3644	7.1665
P01599	Immunoglobulin kappa variable 1-17 OS=Homo sapiens OX=9606 GN=IGKV1-17 PE=1 SV=2 - [KV117_HUMAN]	13.68	1	2	2	3	857589	0	0	0	0	0	1.82769e+06		0				0				0				0				0				0			10.2813	13.68	2	3	117	12.7704	8.67529
P04432	Immunoglobulin kappa variable 1D-39 OS=Homo sapiens OX=9606 GN=IGKV1D-39 PE=3 SV=2 - [KVD39_HUMAN]	29.06	1	2	2	3	0	2.49551e+06	0	0	0	3.12986e+06	1.0539e+07						0												0				0			5.57059	29.06	2	3	117	12.7293	8.66064
P01615	Immunoglobulin kappa variable 2D-28 OS=Homo sapiens OX=9606 GN=IGKV2D-28 PE=1 SV=2 - [KVD28_HUMAN]	16.67	2	2	2	11	1.12425e+07	1.19927e+07	2.46352e+07	1.62088e+07	5.33597e+06	2.08537e+07	6.38454e+07	6.23035	16.67	2	2	3.80334	16.67	2	2		0				0				0			3.74436	16.67	2	2	17.9151	16.67	2	5	120	12.9485	5.93506
P01624	Immunoglobulin kappa variable 3-15 OS=Homo sapiens OX=9606 GN=IGKV3-15 PE=1 SV=2 - [KV315_HUMAN]	26.09	1	1	2	9	6.39807e+06	6.13931e+06	8.8309e+06	9.7515e+06	2.6826e+06	1.87609e+07	2.31215e+07		0				0			4.83359	26.09	2	2	4.81426	26.09	2	2		0			8.70734	26.09	2	3		0			115	12.4882	5.18604
P01619	Immunoglobulin kappa variable 3-20 OS=Homo sapiens OX=9606 GN=IGKV3-20 PE=1 SV=2 - [KV320_HUMAN]	46.55	1	4	4	26	7.28982e+06	8.23494e+06	1.42034e+07	1.13984e+07	3.32966e+06	2.36919e+07	5.96813e+07	6.744	21.55	2	2	7.52811	21.55	2	2	7.36494	32.76	2	2	8.17087	21.55	2	2		0			20.6676	40.52	3	6	43.5846	46.55	4	12	116	12.5493	4.95752
A0A0A0MRZ8	Immunoglobulin kappa variable 3D-11 OS=Homo sapiens OX=9606 GN=IGKV3D-11 PE=3 SV=6 - [KVD11_HUMAN]	26.09	2	2	2	7	0	1.09282e+07	2.12729e+07	1.36326e+07	0	1.73676e+07	2.72174e+07		0				0				0				0				0			7.39245	26.09	2	3	12.2409	26.09	2	4	115	12.6173	5.2876
A0A087WSY6	Immunoglobulin kappa variable 3D-15 OS=Homo sapiens OX=9606 GN=IGKV3D-15 PE=3 SV=6 - [KVD15_HUMAN]	26.09	1	1	2	6	6.39807e+06	6.13931e+06	3.89338e+06	7.80551e+06	0	1.38033e+07	1.31328e+07		0				0				0				0								0			7.3606	26.09	2	3	115	12.5263	5.18604
P06312	Immunoglobulin kappa variable 4-1 OS=Homo sapiens OX=9606 GN=IGKV4-1 PE=1 SV=1 - [KV401_HUMAN]	29.75	1	3	3	7	1.56946e+07	7.10309e+06	1.02228e+07	0	0	1.82771e+07	4.01509e+07		0				0				0								0			8.23366	19.83	2	3	14.5443	29.75	3	4	121	13.3716	5.24951
P0DOY2	Immunoglobulin lambda constant 2 OS=Homo sapiens OX=9606 GN=IGLC2 PE=1 SV=1 - [IGLC2_HUMAN]	60.38	3	5	5	159	2.50488e+08	1.31135e+08	1.97212e+08	1.72961e+08	6.13393e+07	2.42188e+08	8.02166e+08	84.6574	46.23	3	21	83.3066	46.23	3	21	56.5625	46.23	3	14	74.0389	46.23	3	19	55.1974	46.23	3	14	112.82	46.23	3	30	159.024	60.38	5	40	106	11.2865	7.23975
P01699	Immunoglobulin lambda variable 1-44 OS=Homo sapiens OX=9606 GN=IGLV1-44 PE=1 SV=2 - [LV144_HUMAN]	38.46	1	1	2	4	4.87072e+06	0	0	0	0	1.04907e+07	1.29293e+07		0																				0			10.1065	38.46	2	3	117	12.1938	5.17334
P01700	Immunoglobulin lambda variable 1-47 OS=Homo sapiens OX=9606 GN=IGLV1-47 PE=1 SV=2 - [LV147_HUMAN]	24.79	1	1	2	4	4.87072e+06	0	0	0	0	9.35728e+06	2.39721e+07		0																			6.40407	24.79	2	2		0			117	12.2759	5.90967
P80748	Immunoglobulin lambda variable 3-21 OS=Homo sapiens OX=9606 GN=IGLV3-21 PE=1 SV=2 - [LV321_HUMAN]	39.32	1	2	2	6	1.60388e+07	7.88216e+06	8.12606e+06	1.17344e+07	3.85667e+06	1.24416e+07	35930731		0				0				0				0				0				0			23.861	39.32	2	6	117	12.438	5.2876
Q969P0	Immunoglobulin superfamily member 8 OS=Homo sapiens OX=9606 GN=IGSF8 PE=1 SV=1 - [IGSF8_HUMAN]	22.84	1	8	8	11	0	0	0	0	1.44531e+07	0	0										0				0			45.4294	22.84	8	11		0							613	64.9935	8.00146
Q14974	Importin subunit beta-1 OS=Homo sapiens OX=9606 GN=KPNB1 PE=1 SV=2 - [IMB1_HUMAN]	21.92	1	13	13	43	7.31588e+06	7.14067e+06	1.24642e+07	3.74391e+06	4.49585e+06	3.41743e+06	0	27.9802	11.87	7	8	27.5543	13.7	8	9	11.8414	11.64	6	7	14.6017	5.14	3	4	24.9172	12.33	7	7	27.4252	10.16	6	8		0			876	97.108	4.77979
O00410	Importin-5 OS=Homo sapiens OX=9606 GN=IPO5 PE=1 SV=4 - [IPO5_HUMAN]	11.67	1	8	8	11	862531	1.50389e+06	0	0	1.58449e+06	876585	0	13.1031	5.29	3	3	19.6552	8.11	5	5		0				0			10.4956	3.56	3	3		0				0			1097	123.55	4.94482
Q14623	Indian hedgehog protein OS=Homo sapiens OX=9606 GN=IHH PE=1 SV=4 - [IHH_HUMAN]	13.63	2	4	4	11	0	0	3.55775e+07	1.10262e+07	0	0	0		0				0			15.5525	10.95	3	6	12.4117	13.63	4	5		0				0				0			411	45.2223	8.76318
Q9H2U2	Inorganic pyrophosphatase 2, mitochondrial OS=Homo sapiens OX=9606 GN=PPA2 PE=1 SV=2 - [IPYR2_HUMAN]	18.26	1	3	4	4	3.05567e+06	0	1.34039e+07	0	0	0	0		0				0			16.0128	18.26	4	4						0				0				0			334	37.896	7.38623
Q15181	Inorganic pyrophosphatase OS=Homo sapiens OX=9606 GN=PPA1 PE=1 SV=2 - [IPYR_HUMAN]	58.82	1	10	11	26	1.00887e+07	5.50458e+06	2.92438e+07	4.90196e+06	5.96966e+06	5.91883e+06	0	25.0521	27.34	5	6	22.1474	41.18	6	7	18.1386	37.37	7	7	17.0196	20.07	4	4		0			8.04351	14.88	2	2		0			289	32.6392	5.85889
P12268	Inosine-5'-monophosphate dehydrogenase 2 OS=Homo sapiens OX=9606 GN=IMPDH2 PE=1 SV=2 - [IMDH2_HUMAN]	6.23	1	2	2	4	4.38885e+06	666981	8.62561e+06	1.30142e+06	0	0	0	14.6103	6.23	2	4		0				0				0				0				0				0			514	55.7696	6.90283
Q14573	Inositol 1,4,5-trisphosphate receptor type 3 OS=Homo sapiens OX=9606 GN=ITPR3 PE=1 SV=2 - [ITPR3_HUMAN]	1.61	1	2	2	2	0	0	4852625	0	0	0	0		0				0			7.60622	1.61	2	2		0				0				0				0			2671	303.912	6.48096
P29218	Inositol monophosphatase 1 OS=Homo sapiens OX=9606 GN=IMPA1 PE=1 SV=1 - [IMPA1_HUMAN]	35.74	1	7	7	14	6.05956e+06	4.69982e+06	5.69557e+06	3.03049e+06	4.33844e+06	836030	1.73795e+06		0			7.64479	16.97	3	3		0			6.75839	15.88	3	3	26.8432	30.69	6	8		0				0			277	30.1692	5.26221
Q6UXB1	Insulin growth factor-like family member 3 OS=Homo sapiens OX=9606 GN=IGFL3 PE=1 SV=1 - [IGFL3_HUMAN]	33.6	1	2	2	3	0	0	8.89154e+06	0	0	0	0		0				0			12.776	33.6	2	3		0				0				0				0			125	14.1879	8.54346
P18065	Insulin-like growth factor-binding protein 2 OS=Homo sapiens OX=9606 GN=IGFBP2 PE=1 SV=2 - [IBP2_HUMAN]	18.77	1	4	4	6	0	0	7.85178e+06	2.21228e+06	0	0	0		0				0			12.2601	12.62	3	3	13.1902	14.77	3	3		0				0				0			325	34.7912	7.50342
P24593	Insulin-like growth factor-binding protein 5 OS=Homo sapiens OX=9606 GN=IGFBP5 PE=1 SV=1 - [IBP5_HUMAN]	31.99	1	6	6	19	2.88494e+06	3.84325e+06	5.62261e+07	1.76773e+07	0	0	0	3.22458	7.72	2	2	6.89973	18.01	4	4	22.8453	27.94	5	6	18.4916	23.16	5	7		0				0				0			272	30.55	8.20654
Q16270	Insulin-like growth factor-binding protein 7 OS=Homo sapiens OX=9606 GN=IGFBP7 PE=1 SV=1 - [IBP7_HUMAN]	26.6	1	4	4	11	6.13101e+06	2.18098e+06	1.58838e+07	2.96833e+06	0	0	0	11.3914	18.79	3	3	8.92682	13.12	2	2	13.4922	26.6	4	4	4.48425	11.7	2	2		0				0				0			282	29.1114	7.89893
P35858	Insulin-like growth factor-binding protein complex acid labile subunit OS=Homo sapiens OX=9606 GN=IGFALS PE=1 SV=1 - [ALS_HUMAN]	7.77	1	3	3	4	0	0	0	1.05175e+06	0	0	400924						0				0			6.48268	5.12	2	2		0				0			8.70934	5.29	2	2	605	65.9938	6.78564
P56199	Integrin alpha-1 OS=Homo sapiens OX=9606 GN=ITGA1 PE=1 SV=2 - [ITA1_HUMAN]	3.65	1	3	3	3	1.00054e+06	0	6822698	0	0	3.58964e+06	0		0				0				0				0				0			11.5602	3.65	3	3		0			1179	130.765	6.29053
P17301	Integrin alpha-2 OS=Homo sapiens OX=9606 GN=ITGA2 PE=1 SV=1 - [ITA2_HUMAN]	18.29	1	13	13	23	5.37138e+06	1.96369e+06	1.35718e+07	3.04966e+06	2.12222e+06	0	0	31.9623	12.11	8	9		0			30.7608	11.6	9	9	13.4286	6.27	5	5		0				0				0			1181	129.214	5.31299
P23229	Integrin alpha-6 OS=Homo sapiens OX=9606 GN=ITGA6 PE=1 SV=5 - [ITA6_HUMAN]	19.2	1	13	13	18	2.64808e+06	0	1.89084e+07	2.4428e+06	2.35929e+06	828729	0	6.19298	2.12	2	2		0			40.5133	15.75	10	10	11.7061	3.36	3	3	7.19052	3.98	3	3		0				0			1130	126.526	6.60986
P08514	Integrin alpha-IIb OS=Homo sapiens OX=9606 GN=ITGA2B PE=1 SV=3 - [ITA2B_HUMAN]	2.21	1	2	2	2	0	0	0	0	2.66975e+06	1.01104e+06	0		0				0				0				0				0			5.67226	2.21	2	2		0			1039	113.306	5.37646
P11215	Integrin alpha-M OS=Homo sapiens OX=9606 GN=ITGAM PE=1 SV=2 - [ITAM_HUMAN]	7.12	1	5	5	8	0	0	0	3.64187e+06	0	2.3419e+06	0		0				0				0			11.5589	4.34	3	3		0			19.7228	5.99	4	5		0			1152	127.099	7.2251
P06756	Integrin alpha-V OS=Homo sapiens OX=9606 GN=ITGAV PE=1 SV=2 - [ITAV_HUMAN]	25	1	17	17	40	2.87123e+06	2.82298e+06	2.44631e+07	2.75713e+06	1.47321e+06	3.82541e+06	0	9.76104	5.82	3	3	9.31246	4.48	2	2	81.6271	21.56	14	21	13.225	6.77	3	3	4.7846	4.87	2	2	34.6397	13.45	9	9		0			1048	115.964	5.68115
P20702	Integrin alpha-X OS=Homo sapiens OX=9606 GN=ITGAX PE=1 SV=3 - [ITAX_HUMAN]	3.01	1	2	2	2	0	0	7.25608e+06	0	0	2.9238e+06	0						0				0				0				0			10.3219	3.01	2	2		0			1163	127.749	6.63916
P05556	Integrin beta-1 OS=Homo sapiens OX=9606 GN=ITGB1 PE=1 SV=2 - [ITB1_HUMAN]	28.7	1	16	16	71	1.75179e+07	6.73382e+06	6.02172e+07	1.30284e+07	7.03614e+06	1.43409e+07	2.68258e+06	41.0028	20.18	10	11	34.3766	15.54	7	8	55.5011	26.44	13	16	38.0519	19.8	11	11	37.8637	14.54	8	10	46.8707	17.67	10	12	9.69764	5.51	3	3	798	88.357	5.38916
P05107	Integrin beta-2 OS=Homo sapiens OX=9606 GN=ITGB2 PE=1 SV=2 - [ITB2_HUMAN]	27.31	1	14	14	24	0	0	1.73578e+07	10463987	8.21788e+06	6.79251e+06	0		0				0			33.6508	17.95	9	9	20.5506	12.61	6	6		0			37.9511	19.25	9	9		0			769	84.7261	6.94678
P05106	Integrin beta-3 OS=Homo sapiens OX=9606 GN=ITGB3 PE=1 SV=2 - [ITB3_HUMAN]	13.96	1	7	7	14	0	1.5328e+06	1.09422e+07	0	3.61322e+06	2.90009e+06	0		0				0			21.6694	13.96	6	6		0			16.0932	8.63	5	5	10.727	8.88	3	3		0			788	87.0004	5.23682
P16144	Integrin beta-4 OS=Homo sapiens OX=9606 GN=ITGB4 PE=1 SV=5 - [ITB4_HUMAN]	17.4	1	21	21	29	1.27226e+06	0	2.40103e+07	2.9156e+06	0	0	0	9.0247	1.98	3	3		0			69.6649	16.63	20	20	20.9936	5.98	6	6		0				0				0			1822	202.039	6.0874
P18084	Integrin beta-5 OS=Homo sapiens OX=9606 GN=ITGB5 PE=1 SV=1 - [ITB5_HUMAN]	15.27	1	6	6	8	1.03093e+06	0	1.45126e+07	0	0	3.21909e+06	0		0				0			15.6778	10.26	4	4		0				0			15.5788	10.89	4	4		0			799	87.9962	6.06201
P18564	Integrin beta-6 OS=Homo sapiens OX=9606 GN=ITGB6 PE=1 SV=2 - [ITB6_HUMAN]	6.98	1	3	3	3	0	0	4.99227e+06	0	0	0	0		0				0			7.97278	6.98	3	3		0				0				0				0			788	85.8793	5.5542
P26012	Integrin beta-8 OS=Homo sapiens OX=9606 GN=ITGB8 PE=2 SV=1 - [ITB8_HUMAN]	4.16	1	2	2	3	343255	767031	0	471259	596390	0	221497		0			7.28493	4.16	2	3		0				0				0				0				0			769	85.5754	7.25439
P19827	Inter-alpha-trypsin inhibitor heavy chain H1 OS=Homo sapiens OX=9606 GN=ITIH1 PE=1 SV=3 - [ITIH1_HUMAN]	25.14	1	16	16	76	3.60132e+07	7.45392e+06	2.85956e+07	2.05026e+07	6.39421e+06	1.22425e+07	3.20622e+07	63.3688	17.67	11	14	30.3087	12.29	6	7	19.7512	10.65	5	6	45.6863	19.21	12	12	19.1432	6.15	4	4	39.7909	12.29	7	8	117.281	22.5	13	25	911	101.326	6.78564
P19823	Inter-alpha-trypsin inhibitor heavy chain H2 OS=Homo sapiens OX=9606 GN=ITIH2 PE=1 SV=2 - [ITIH2_HUMAN]	21.35	1	14	14	74	1.62811e+07	6.54064e+06	2.0277e+07	2.06037e+07	6.34021e+06	1.12268e+07	1.13223e+07	32.2886	17.65	11	11	14.0855	9.94	6	7	31.3143	16.49	10	11	55.8346	17.65	12	16	14.388	7.82	5	5	21.9965	11.63	8	9	45.7249	14.16	11	15	946	106.397	6.85889
Q06033	Inter-alpha-trypsin inhibitor heavy chain H3 OS=Homo sapiens OX=9606 GN=ITIH3 PE=1 SV=2 - [ITIH3_HUMAN]	2.81	1	2	2	2	2.89483e+06	0	0	0	0	0	845853	4.96161	2.81	2	2		0				0				0				0				0				0			890	99.7865	5.74463
Q14624	Inter-alpha-trypsin inhibitor heavy chain H4 OS=Homo sapiens OX=9606 GN=ITIH4 PE=1 SV=4 - [ITIH4_HUMAN]	26.24	1	17	17	43	4.6791e+06	1.79012e+06	0	4.14798e+06	1.99087e+06	2.27762e+06	1.45478e+07	37.1604	15.27	10	11	18.1541	6.13	3	4		0			34.2442	12.26	7	9	5.53782	2.04	2	2	11.1271	5.16	4	4	41.8837	21.29	11	13	930	103.293	6.97607
P05362	Intercellular adhesion molecule 1 OS=Homo sapiens OX=9606 GN=ICAM1 PE=1 SV=2 - [ICAM1_HUMAN]	13.53	1	5	5	5	786624	679087	0	578144	2.31692e+06	1.76983e+06	0		0				0				0				0			11.5986	9.02	3	3	5.79758	4.51	2	2					532	57.789	7.98682
Q9UMF0	Intercellular adhesion molecule 5 OS=Homo sapiens OX=9606 GN=ICAM5 PE=1 SV=3 - [ICAM5_HUMAN]	9.09	1	5	5	5	0	0	0	0	4.0664e+06	0	0		0				0				0				0			20.7945	9.09	5	5		0				0			924	97.0557	5.94775
Q12905	Interleukin enhancer-binding factor 2 OS=Homo sapiens OX=9606 GN=ILF2 PE=1 SV=2 - [ILF2_HUMAN]	45.38	1	10	10	29	9.48067e+06	2.89725e+06	1.62002e+07	3.89467e+06	0	3.16035e+06	0	46.0072	40	8	11	24.1391	25.9	5	6	19.8407	19.49	5	5	14.7784	22.05	5	5		0			7.9188	6.67	2	2		0			390	43.0352	5.26221
Q12906	Interleukin enhancer-binding factor 3 OS=Homo sapiens OX=9606 GN=ILF3 PE=1 SV=3 - [ILF3_HUMAN]	15.66	1	8	8	25	1.18135e+07	3.09145e+06	1.37053e+07	2.08979e+06	3.0626e+06	2.74892e+06	0	30.0438	12.98	6	7	17.7438	10.4	5	5	25.5963	9.96	6	7	13.9894	5.48	3	3		0			13.0116	4.7	3	3		0			894	95.2791	8.76318
P07476	Involucrin OS=Homo sapiens OX=9606 GN=IVL PE=1 SV=2 - [INVO_HUMAN]	53.16	1	22	22	40	916366	0	8.46178e+07	8.32187e+06	0	0	0		0				0			109.742	51.45	21	27	48.6588	36.24	13	13		0								0			585	68.4372	4.61475
Q2TAA2	Isoamyl acetate-hydrolyzing esterase 1 homolog OS=Homo sapiens OX=9606 GN=IAH1 PE=1 SV=1 - [IAH1_HUMAN]	20.56	1	3	3	5	2.85604e+06	2.03527e+06	0	0	0	0	0	7.49078	14.52	2	2	9.43067	20.56	3	3		0				0				0				0				0			248	27.581	5.30029
Q96CN7	Isochorismatase domain-containing protein 1 OS=Homo sapiens OX=9606 GN=ISOC1 PE=1 SV=3 - [ISOC1_HUMAN]	9.73	1	2	2	2	2.61577e+06	0	0	0	0	0	0	6.90515	9.73	2	2						0				0								0							298	32.2161	7.38623
Q96AB3	Isochorismatase domain-containing protein 2 OS=Homo sapiens OX=9606 GN=ISOC2 PE=1 SV=1 - [ISOC2_HUMAN]	27.32	1	2	2	2	1.67471e+06	2.91276e+06	0	2.06267e+06	0	1.08564e+06	0		0				0							11.433	27.32	2	2		0				0							205	22.3228	7.76709
P50213	Isocitrate dehydrogenase [NAD] subunit alpha, mitochondrial OS=Homo sapiens OX=9606 GN=IDH3A PE=1 SV=1 - [IDH3A_HUMAN]	9.02	1	2	2	2	6.19288e+06	4.60719e+06	2.44273e+06	4.13599e+06	7.98839e+06	2.03362e+06	0		0				0				0				0			7.16236	9.02	2	2		0				0			366	39.5661	6.91748
P51553	Isocitrate dehydrogenase [NAD] subunit gamma, mitochondrial OS=Homo sapiens OX=9606 GN=IDH3G PE=1 SV=1 - [IDH3G_HUMAN]	21.63	1	4	4	5	0	0	0	0	4.64892e+06	0	0		0				0				0							16.0933	21.63	4	5						0			393	42.7671	8.49951
O75874	Isocitrate dehydrogenase [NADP] cytoplasmic OS=Homo sapiens OX=9606 GN=IDH1 PE=1 SV=2 - [IDHC_HUMAN]	36.96	1	10	11	52	1.00342e+07	6.3816e+06	1.18053e+07	6.56173e+06	3.75815e+06	4.23453e+06	719850	42.924	22.71	7	10	37.8834	32.13	9	10	29.5007	22.22	7	8	35.2459	30.43	9	10	18.6826	13.77	4	4	36.0981	25.12	7	8	9.89518	7.97	2	2	414	46.6295	7.00537
P48735	Isocitrate dehydrogenase [NADP], mitochondrial OS=Homo sapiens OX=9606 GN=IDH2 PE=1 SV=2 - [IDHP_HUMAN]	42.26	1	17	18	64	1.15687e+07	1.33694e+07	2.34376e+07	1.15704e+07	1.89023e+07	4.58929e+06	1.36535e+06	34.4876	23.67	8	10	33.3793	23.23	8	8	51.2411	32.3	14	15	37.8883	25	9	10	57.5984	33.63	13	15	19.0959	14.6	4	4	6.81892	5.97	2	2	452	50.8769	8.68994
Q9NSE4	Isoleucine--tRNA ligase, mitochondrial OS=Homo sapiens OX=9606 GN=IARS2 PE=1 SV=2 - [SYIM_HUMAN]	6.82	1	4	4	4	1.19831e+06	0	9.36595e+06	0	0	0	0		0				0			12.2454	6.82	4	4		0				0				0				0			1012	113.719	7.1958
P26440	Isovaleryl-CoA dehydrogenase, mitochondrial OS=Homo sapiens OX=9606 GN=IVD PE=1 SV=1 - [IVD_HUMAN]	5.2	1	2	2	2	0	1.18671e+06	0	0	0	4.10553e+06	0		0				0				0				0				0			5.90987	5.2	2	2		0			423	46.2896	8.19189
P53990	IST1 homolog OS=Homo sapiens OX=9606 GN=IST1 PE=1 SV=1 - [IST1_HUMAN]	7.69	1	2	2	2	0	0	0	990279	481434	0	0		0				0				0			5.00549	7.69	2	2		0				0							364	39.7255	5.35107
P14923	Junction plakoglobin OS=Homo sapiens OX=9606 GN=JUP PE=1 SV=3 - [PLAK_HUMAN]	45.1	1	18	20	37	1.72373e+07	0	3.35537e+07	7.83998e+06	0	0	0	78.4563	35.17	15	21		0			23.9876	15.44	7	7	24.5609	16.64	8	8		0				0				0			745	81.6927	6.13818
P57087	Junctional adhesion molecule B OS=Homo sapiens OX=9606 GN=JAM2 PE=1 SV=1 - [JAM2_HUMAN]	20.47	1	5	5	5	0	1.44637e+06	0	0	4.74501e+06	0	0		0				0				0				0			15.4442	20.47	5	5		0				0			298	33.1859	9.08545
Q9P0G3	Kallikrein-14 OS=Homo sapiens OX=9606 GN=KLK14 PE=1 SV=2 - [KLK14_HUMAN]	43.82	1	9	9	18	0	0	3.73573e+07	1.14309e+07	0	0	0						0			33.852	43.82	9	9	35.0953	43.82	9	9						0				0			267	29.1028	9.23193
P29622	Kallistatin OS=Homo sapiens OX=9606 GN=SERPINA4 PE=1 SV=3 - [KAIN_HUMAN]	5.39	1	2	2	2	0	0	0	0	0	0	1.89116e+06		0				0				0				0				0				0			6.68029	5.39	2	2	427	48.5112	7.75244
Q7Z4H8	KDEL motif-containing protein 2 OS=Homo sapiens OX=9606 GN=KDELC2 PE=1 SV=2 - [KDEL2_HUMAN]	10.65	1	3	3	3	0	0	0	0	0	1.98872e+06	0		0				0				0				0				0			9.92976	10.65	3	3		0			507	58.5352	8.23584
O94819	Kelch repeat and BTB domain-containing protein 11 OS=Homo sapiens OX=9606 GN=KBTBD11 PE=1 SV=1 - [KBTBB_HUMAN]	11.88	1	5	5	5	0	0	0	0	3.82237e+06	0	0		0				0				0				0			17.9726	11.88	5	5		0				0			623	65.6788	6.07471
Q15323	Keratin, type I cuticular Ha1 OS=Homo sapiens OX=9606 GN=KRT31 PE=1 SV=3 - [K1H1_HUMAN]	43.75	1	4	15	37	0	0	4.96704e+07	3.77898e+07	0	0	0		0							46.112	34.86	11	14	71.3352	35.82	13	23		0				0							416	47.2071	4.88135
Q14525	Keratin, type I cuticular Ha3-II OS=Homo sapiens OX=9606 GN=KRT33B PE=1 SV=3 - [KT33B_HUMAN]	48.51	1	5	16	32	0	0	3.31649e+07	3.095e+07	0	0	0		0				0			46.5855	36.39	11	14	61.0256	35.4	12	18		0				0							404	46.1845	4.84326
O76011	Keratin, type I cuticular Ha4 OS=Homo sapiens OX=9606 GN=KRT34 PE=1 SV=2 - [KRT34_HUMAN]	38.99	1	7	15	38	0	0	4.59415e+07	3.77898e+07	0	0	0		0				0			43.1904	19.04	8	13	76.2527	38.99	15	25		0				0				0			436	49.3922	5.05908
P13645	Keratin, type I cytoskeletal 10 OS=Homo sapiens OX=9606 GN=KRT10 PE=1 SV=6 - [K1C10_HUMAN]	42.98	1	19	21	46	0	0	5.46998e+07	3.77783e+07	3.21389e+07	6.30184e+06	3.13772e+06		0				0				0				0			109.091	39.73	19	29	19.9835	12.5	6	6	20.6942	11.13	5	5	584	58.7917	5.21143
P02533	Keratin, type I cytoskeletal 14 OS=Homo sapiens OX=9606 GN=KRT14 PE=1 SV=4 - [K1C14_HUMAN]	55.08	1	11	30	199	6.1568e+07	2994991	4.1888e+08	1.06865e+08	1.21175e+07	5.84307e+06	2.10852e+06	134.444	44.92	20	38	22.4449	17.37	6	6	283.513	55.08	30	78	210.797	51.27	25	59	35.8079	24.79	9	9	19.9427	11.44	5	6	12.8523	8.9	3	3	472	51.5294	5.16064
P19012	Keratin, type I cytoskeletal 15 OS=Homo sapiens OX=9606 GN=KRT15 PE=1 SV=3 - [K1C15_HUMAN]	23.46	1	4	11	58	5.97139e+07	1.91097e+06	3.91831e+08	1.0006e+08	5.69081e+06	5.83741e+06	2.00606e+06	49.0171	19.3	8	12		0			81.5152	13.16	8	24	45.1771	10.96	6	12		0				0				0			456	49.1811	4.76709
P08779	Keratin, type I cytoskeletal 16 OS=Homo sapiens OX=9606 GN=KRT16 PE=1 SV=4 - [K1C16_HUMAN]	53.91	1	13	25	126	5.39008e+07	1.73694e+06	3.91831e+08	1.04751e+08	1.0908e+07	5.84307e+06	2.55487e+06	73.3529	23.68	10	19		0			190.156	50.11	24	51	153.548	49.47	22	41		0				0				0			473	51.2362	5.04639
Q04695	Keratin, type I cytoskeletal 17 OS=Homo sapiens OX=9606 GN=KRT17 PE=1 SV=2 - [K1C17_HUMAN]	42.59	1	11	23	124	5.26365e+07	2.05088e+06	3.91831e+08	9.80585e+07	4.29533e+06	8.43688e+06	2.55487e+06	77.7083	31.25	14	22		0			170.661	42.59	21	51	136.866	39.12	19	40		0				0				0			432	48.076	5.021
P08727	Keratin, type I cytoskeletal 19 OS=Homo sapiens OX=9606 GN=KRT19 PE=1 SV=4 - [K1C19_HUMAN]	68.75	1	20	28	162	8.81094e+07	3.13298e+06	4.84504e+08	1.03201e+08	4.56401e+06	9.07729e+06	2.49564e+06	141.206	57.5	21	41	10.8835	9	3	3	187.745	61.25	27	62	120.18	52.75	22	37	12.2487	11	4	4	29.3261	24	8	9	22.4437	15.25	5	6	400	44.0791	5.13525
P35527	Keratin, type I cytoskeletal 9 OS=Homo sapiens OX=9606 GN=KRT9 PE=1 SV=3 - [K1C9_HUMAN]	20.22	1	8	8	12	0	8.66718e+06	0	0	0	5.99114e+06	2.84645e+06		0			9.16165	8.03	2	2		0				0				0			16.2286	11.4	4	4	26.8497	14.93	5	6	623	62.0268	5.23682
Q9NSB2	Keratin, type II cuticular Hb4 OS=Homo sapiens OX=9606 GN=KRT84 PE=2 SV=2 - [KRT84_HUMAN]	17.17	1	6	8	11	1.74955e+06	0	1.21226e+07	1.29065e+06	4.24149e+06	0	0		0				0			21.221	14.5	6	6	6.48913	5	3	3		0				0				0			600	64.8015	7.56201
P78386	Keratin, type II cuticular Hb5 OS=Homo sapiens OX=9606 GN=KRT85 PE=1 SV=1 - [KRT85_HUMAN]	26.63	1	6	12	24	0	0	5.11681e+07	3.98355e+07	4.24149e+06	0	0		0				0				0			43.1421	24.85	11	14		0				0				0			507	55.7665	6.55127
O43790	Keratin, type II cuticular Hb6 OS=Homo sapiens OX=9606 GN=KRT86 PE=1 SV=1 - [KRT86_HUMAN]	40.95	1	11	17	42	0	0	5.81415e+07	4.31769e+07	4.24149e+06	0	0		0				0			65.3217	31.69	12	19	66.4112	34.36	14	22		0				0				0			486	53.4663	5.65576
P04264	Keratin, type II cytoskeletal 1 OS=Homo sapiens OX=9606 GN=KRT1 PE=1 SV=6 - [K2C1_HUMAN]	34.32	1	18	20	66	1.23944e+07	2.49341e+06	1.04144e+08	3.08163e+07	3.85407e+07	1.8444e+07	6.43284e+06		0			8.4115	3.73	2	2		0				0			95.6909	32.92	18	24	55.0613	24.84	13	15	51.7458	24.69	11	12	644	65.999	8.11865
P13647	Keratin, type II cytoskeletal 5 OS=Homo sapiens OX=9606 GN=KRT5 PE=1 SV=3 - [K2C5_HUMAN]	50	1	24	36	191	5.39838e+07	5.02161e+06	4.62728e+08	1.0312e+08	1.03689e+07	4.7305e+06	2.91149e+06	131.597	40.68	24	41	19.5712	14.07	6	6	254.793	45.93	33	74	173.488	48.14	30	54	24.5799	11.86	6	7	27.607	7.97	4	8		0			590	62.34	7.73779
P02538	Keratin, type II cytoskeletal 6A OS=Homo sapiens OX=9606 GN=KRT6A PE=1 SV=3 - [K2C6A_HUMAN]	54.96	2	6	36	189	5.34264e+07	4.55059e+06	4.86992e+08	1.20212e+08	9.61084e+06	5.30612e+06	1.7639e+06	87.533	39.01	19	28	6.84719	9.22	4	4	294.633	51.77	33	81	211.144	48.76	29	61		0				0				0			564	60.0083	8.00146
P04259	Keratin, type II cytoskeletal 6B OS=Homo sapiens OX=9606 GN=KRT6B PE=1 SV=5 - [K2C6B_HUMAN]	50.18	1	5	33	177	5.34264e+07	4.55059e+06	4.86992e+08	1.20212e+08	1.57748e+07	6.09201e+06	1.7639e+06		0			6.84719	9.22	4	4		0			203.136	46.99	27	59	23.7219	12.41	6	7	29.9969	9.93	5	9		0			564	60.0303	8.00146
P08729	Keratin, type II cytoskeletal 7 OS=Homo sapiens OX=9606 GN=KRT7 PE=1 SV=5 - [K2C7_HUMAN]	27.72	1	8	12	20	2.43402e+07	1.01935e+08	5.97112e+06	9.06192e+06	4.24149e+06	0	1.07033e+07	33.9863	26.23	11	13		0				0				0				0				0				0			469	51.3543	5.47803
O95678	Keratin, type II cytoskeletal 75 OS=Homo sapiens OX=9606 GN=KRT75 PE=1 SV=2 - [K2C75_HUMAN]	19.42	1	3	12	39	2.32055e+07	4.7374e+06	1.64222e+08	4.74905e+07	7.11794e+06	0	0		0				0			63.6603	15.06	9	20		0				0				0				0			551	59.524	7.73779
P05787	Keratin, type II cytoskeletal 8 OS=Homo sapiens OX=9606 GN=KRT8 PE=1 SV=7 - [K2C8_HUMAN]	45.96	1	17	23	81	3.60949e+07	5.1953e+07	1.73237e+08	4.67774e+07	9.41907e+06	4.96727e+06	4.7437e+06	91.0143	44.51	21	31		0			78.0196	34.78	18	24	38.0909	26.09	11	15		0				0				0			483	53.6711	5.59229
Q8IUC1	Keratin-associated protein 11-1 OS=Homo sapiens OX=9606 GN=KRTAP11-1 PE=1 SV=1 - [KR111_HUMAN]	16.56	1	4	4	13	0	0	2.32461e+07	1.03446e+07	0	0	0		0				0			18.2983	15.95	3	6	22.0617	16.56	4	7		0								0			163	17.0736	7.89893
Q9BYT5	Keratin-associated protein 2-2 OS=Homo sapiens OX=9606 GN=KRTAP2-2 PE=2 SV=3 - [KRA22_HUMAN]	26.83	3	2	2	4	0	0	6.12784e+06	7.31919e+06	0	0	0									3.50243	26.83	2	2	6.73922	26.83	2	2													123	12.9472	7.81104
Q14894	Ketimine reductase mu-crystallin OS=Homo sapiens OX=9606 GN=CRYM PE=1 SV=1 - [CRYM_HUMAN]	30.89	1	6	6	11	1.01648e+06	6.14042e+06	0	1.00814e+06	1.22702e+07	0	0		0			9.36905	14.01	2	3		0				0			29.928	30.89	6	8		0				0			314	33.7544	5.13525
Q07666	KH domain-containing, RNA-binding, signal transduction-associated protein 1 OS=Homo sapiens OX=9606 GN=KHDRBS1 PE=1 SV=1 - [KHDR1_HUMAN]	8.58	1	3	3	8	1.19909e+07	0	1.45068e+07	0	4.39172e+06	0	0	9.46675	4.06	2	2		0			7.59647	8.58	3	3		0			10.7485	7.67	2	3		0				0			443	48.1972	8.66064
Q86UP2	Kinectin OS=Homo sapiens OX=9606 GN=KTN1 PE=1 SV=1 - [KTN1_HUMAN]	9.65	1	9	9	21	5.95248e+06	568770	9.84481e+06	816379	599774	628112	0	28.0826	8.77	8	8	7.97753	1.84	2	2	23.0578	6.04	6	6	8.43594	1.84	2	2		0			12.155	2.8	3	3		0			1357	156.179	5.64307
Q07866	Kinesin light chain 1 OS=Homo sapiens OX=9606 GN=KLC1 PE=1 SV=2 - [KLC1_HUMAN]	4.71	1	2	2	2	3.32374e+06	0	0	2.09815e+06	0	0	0	8.80247	4.71	2	2		0				0				0				0				0				0			573	65.2689	6.20166
P33176	Kinesin-1 heavy chain OS=Homo sapiens OX=9606 GN=KIF5B PE=1 SV=1 - [KINH_HUMAN]	13.5	1	9	9	21	4.23054e+06	2.38031e+06	9.00735e+06	1.9354e+06	2.77525e+06	0	0	17.2	6.96	5	5	8.62812	3.12	2	2	20.5997	9.14	6	6	16.9306	5.61	4	4	15.7933	6.13	4	4		0				0			963	109.617	6.50732
P01042	Kininogen-1 OS=Homo sapiens OX=9606 GN=KNG1 PE=1 SV=2 - [KNG1_HUMAN]	32.14	1	18	18	64	1.30314e+07	2.82345e+06	3.2913e+07	2.67576e+07	7.27998e+06	1.11845e+07	4.76873e+07	29.0702	11.96	7	7	20.8354	9.16	5	5	28.4999	12.27	7	8	47.1852	22.98	10	12	9.57202	8.07	3	3	31.7507	14.91	8	8	88.5255	28.88	15	21	644	71.9122	6.81494
Q08431	Lactadherin OS=Homo sapiens OX=9606 GN=MFGE8 PE=1 SV=2 - [MFGM_HUMAN]	46.25	1	12	12	21	0	0	4.65504e+07	3.54847e+06	0	2.82557e+06	0		0				0			48.2068	46.25	12	12	14.9827	14.99	4	4		0			20.2735	20.41	5	5		0			387	43.0955	8.14795
P02788	Lactotransferrin OS=Homo sapiens OX=9606 GN=LTF PE=1 SV=6 - [TRFL_HUMAN]	45.07	1	25	25	40	4.96483e+06	5.21827e+06	1.24858e+07	1.1379e+07	0	7.53966e+06	1.60546e+06		0			17.5186	10.42	4	5		0			69.9386	37.61	19	19		0			49.2613	27.04	13	13	13.0413	6.2	3	3	710	78.1319	8.11865
Q04760	Lactoylglutathione lyase OS=Homo sapiens OX=9606 GN=GLO1 PE=1 SV=4 - [LGUL_HUMAN]	46.2	1	7	7	34	2.4806e+07	1.16217e+07	1.15815e+07	7.57764e+06	1.29824e+07	5.30199e+06	2.26117e+06	34.8296	46.2	7	11	35.7098	46.2	7	10	13.6739	40.22	4	4		0			15.0276	45.65	6	7	4.56746	14.13	2	2		0			184	20.7642	5.31299
O00515	Ladinin-1 OS=Homo sapiens OX=9606 GN=LAD1 PE=1 SV=2 - [LAD1_HUMAN]	8.12	1	2	2	2	0	0	1.36205e+07	1.10595e+06	0	0	0		0				0			8.11701	8.12	2	2		0				0				0				0			517	57.0968	9.67139
Q9Y2S2	Lambda-crystallin homolog OS=Homo sapiens OX=9606 GN=CRYL1 PE=1 SV=3 - [CRYL1_HUMAN]	27.59	1	6	6	12	0	3.99732e+06	0	2.61787e+06	5.58102e+06	0	1.27167e+06		0			6.16705	13.17	2	2		0			19.1425	27.59	6	6	12.5417	20.69	4	4		0				0			319	35.3961	6.17627
P42167	Lamina-associated polypeptide 2, isoforms beta/gamma OS=Homo sapiens OX=9606 GN=TMPO PE=1 SV=2 - [LAP2B_HUMAN]	18.94	1	5	5	6	5.2563e+06	787587	0	2.83372e+06	2.71972e+06	2.02342e+06	0	17.1377	16.08	4	4		0				0			5.85716	5.73	2	2		0				0				0			454	50.6395	9.37842
P20700	Lamin-B1 OS=Homo sapiens OX=9606 GN=LMNB1 PE=1 SV=2 - [LMNB1_HUMAN]	37.03	1	16	17	68	1.03193e+07	3.3674e+06	3.16863e+07	5.30951e+06	4.14728e+06	1.02176e+07	0	53.9234	30.89	13	16	15.8539	15.19	6	6	63.2031	28.67	12	18	37.4796	20.48	8	10	16.0788	8.19	4	4	49.4719	26.62	12	14		0			586	66.3676	5.16064
Q03252	Lamin-B2 OS=Homo sapiens OX=9606 GN=LMNB2 PE=1 SV=4 - [LMNB2_HUMAN]	43.39	1	21	22	72	9.17164e+06	1.37338e+06	3.17157e+07	7.90123e+06	9.38237e+06	1.11965e+07	0	28.8947	16.45	9	9	5.93351	5.16	3	3	56.9977	31.61	15	16	42.6095	22.9	13	14	36.9725	20.81	11	11	68.1758	35.32	18	19		0			620	69.9057	5.59229
Q16787	Laminin subunit alpha-3 OS=Homo sapiens OX=9606 GN=LAMA3 PE=1 SV=2 - [LAMA3_HUMAN]	17.91	1	38	38	100	3.68274e+06	0	1.32445e+08	3.25603e+07	0	0	7.61537e+06	20.9639	1.83	3	4		0			189.046	16.86	35	48	121.221	11.28	24	31		0				0			78.2005	5.7	12	17	3333	366.414	7.23975
Q16363	Laminin subunit alpha-4 OS=Homo sapiens OX=9606 GN=LAMA4 PE=1 SV=4 - [LAMA4_HUMAN]	5.32	1	6	6	7	0	0	6.03479e+06	0	0	1.18421e+06	0		0				0			14.0467	3.24	4	4		0				0			9.0087	2.91	3	3		0			1823	202.397	6.27783
P07942	Laminin subunit beta-1 OS=Homo sapiens OX=9606 GN=LAMB1 PE=1 SV=2 - [LAMB1_HUMAN]	17.97	1	14	14	14	4.66187e+06	0	2.05568e+07	2.35674e+06	0	2.6397e+06	0		0				0			46.8475	17.97	14	14		0				0				0				0			1786	197.909	4.94482
P55268	Laminin subunit beta-2 OS=Homo sapiens OX=9606 GN=LAMB2 PE=1 SV=2 - [LAMB2_HUMAN]	3.11	1	3	3	5	0	0	3.10383e+06	269854	1.0005e+06	0	0		0				0			8.14866	1.84	2	2		0			5.84985	2.39	2	3		0				0			1798	195.854	6.52197
Q13751	Laminin subunit beta-3 OS=Homo sapiens OX=9606 GN=LAMB3 PE=1 SV=1 - [LAMB3_HUMAN]	57.94	1	40	40	141	4.52278e+06	0	1.01564e+08	2.41224e+07	0	0	8.71403e+06	12.0345	7.08	5	5		0			235.038	57.94	40	62	171.859	43.17	31	48		0				0			107.366	27.99	19	26	1172	129.489	7.21045
P11047	Laminin subunit gamma-1 OS=Homo sapiens OX=9606 GN=LAMC1 PE=1 SV=3 - [LAMC1_HUMAN]	16.47	1	16	16	30	1.68733e+06	0	1.46384e+07	1.74895e+06	1.16286e+06	2.29653e+06	0	20.1743	4.79	4	4		0			71.0995	15.54	15	16	23.6454	5.47	5	5		0			27.1546	5.72	5	5		0			1609	177.489	5.12256
Q13753	Laminin subunit gamma-2 OS=Homo sapiens OX=9606 GN=LAMC2 PE=1 SV=2 - [LAMC2_HUMAN]	44.17	1	35	35	112	6.47041e+06	0	1.14093e+08	1.97007e+07	0	0	1.15056e+07	29.5897	11.48	7	7		0			211.637	44.17	34	54	128.398	31.01	24	32		0				0			66.8493	20.28	15	19	1193	130.892	6.18896
O43813	LanC-like protein 1 OS=Homo sapiens OX=9606 GN=LANCL1 PE=1 SV=1 - [LANC1_HUMAN]	18.55	1	5	5	9	5.95279e+06	6.48803e+06	9.85316e+06	0	1.0248e+07	979632	0	11.1101	11.78	3	3	8.94141	8.77	2	2		0							10.2602	9.77	3	4		0				0			399	45.2536	7.75244
Q9NS86	LanC-like protein 2 OS=Homo sapiens OX=9606 GN=LANCL2 PE=1 SV=1 - [LANC2_HUMAN]	12.67	1	4	4	4	0	0	0	0	5.21499e+06	0	0		0				0				0				0			13.9987	12.67	4	4						0			450	50.8214	7.43018
Q14766	Latent-transforming growth factor beta-binding protein 1 OS=Homo sapiens OX=9606 GN=LTBP1 PE=1 SV=4 - [LTBP1_HUMAN]	2.09	1	2	2	2	0	0	0	0	0	3.25263e+06	0		0				0				0				0				0			9.22052	2.09	2	2		0			1721	186.673	5.96045
Q14767	Latent-transforming growth factor beta-binding protein 2 OS=Homo sapiens OX=9606 GN=LTBP2 PE=1 SV=3 - [LTBP2_HUMAN]	8.51	1	9	9	9	1.18421e+06	0	0	0	0	1.15562e+07	0		0				0				0				0				0			36.6193	8.51	9	9		0			1821	194.923	5.18604
Q8N2S1	Latent-transforming growth factor beta-binding protein 4 OS=Homo sapiens OX=9606 GN=LTBP4 PE=1 SV=2 - [LTBP4_HUMAN]	1.91	1	2	2	2	0	0	1.54247e+06	0	0	1.13829e+06	0		0				0				0				0				0			2.11196	1.91	2	2		0			1624	173.32	5.42725
Q9BS40	Latexin OS=Homo sapiens OX=9606 GN=LXN PE=1 SV=2 - [LXN_HUMAN]	12.16	1	2	2	4	2.20267e+07	5.24946e+06	2.98657e+07	6.1819e+06	0	7.21279e+06	0		0				0			5.72458	12.16	2	2		0				0			5.4186	12.16	2	2					222	25.7339	5.78271
Q15334	Lethal(2) giant larvae protein homolog 1 OS=Homo sapiens OX=9606 GN=LLGL1 PE=1 SV=3 - [L2GL1_HUMAN]	4.04	1	2	2	2	0	3.19909e+06	0	0	5.0769e+06	0	0		0				0				0				0			7.16187	4.04	2	2		0				0			1064	115.346	6.29053
P02750	Leucine-rich alpha-2-glycoprotein OS=Homo sapiens OX=9606 GN=LRG1 PE=1 SV=2 - [A2GL_HUMAN]	41.5	1	9	9	19	0	0	0	0	0	0	1.77798e+07										0								0				0			59.2124	41.5	9	19	347	38.1541	6.94678
P42704	Leucine-rich PPR motif-containing protein, mitochondrial OS=Homo sapiens OX=9606 GN=LRPPRC PE=1 SV=3 - [LPPRC_HUMAN]	11.84	1	11	11	13	2.52847e+06	0	6.17087e+06	0	0	0	0		0				0			42.5791	11.84	11	13		0				0				0				0			1394	157.805	6.12549
Q32MZ4	Leucine-rich repeat flightless-interacting protein 1 OS=Homo sapiens OX=9606 GN=LRRFIP1 PE=1 SV=2 - [LRRF1_HUMAN]	3.71	1	2	2	2	416358	0	2.55379e+06	0	0	0	0		0				0			9.51104	3.71	2	2		0				0				0				0			808	89.1987	4.65283
Q8TF66	Leucine-rich repeat-containing protein 15 OS=Homo sapiens OX=9606 GN=LRRC15 PE=2 SV=2 - [LRC15_HUMAN]	13.43	1	5	5	8	0	0	2.02866e+07	4.83333e+06	0	0	0									19.548	13.43	5	5	12.2296	7.4	3	3		0				0							581	64.3252	6.7124
Q96AG4	Leucine-rich repeat-containing protein 59 OS=Homo sapiens OX=9606 GN=LRRC59 PE=1 SV=1 - [LRC59_HUMAN]	7.49	1	2	2	2	6.73234e+06	0	1.00994e+07	1.76201e+06	3.22467e+06	4.52139e+06	0		0								0				0				0			2.00643	7.49	2	2					307	34.9089	9.56885
Q08722	Leukocyte surface antigen CD47 OS=Homo sapiens OX=9606 GN=CD47 PE=1 SV=1 - [CD47_HUMAN]	9.6	1	4	4	6	0	5327001	0	0	4.52095e+07	8.47916e+06	0		0				0				0				0			14.631	9.6	4	6		0				0			323	35.1907	7.21045
P09960	Leukotriene A-4 hydrolase OS=Homo sapiens OX=9606 GN=LTA4H PE=1 SV=2 - [LKHA4_HUMAN]	31.42	1	14	14	39	6.653e+06	4.5063e+06	8.9079e+06	4.91177e+06	2.55692e+06	2.43523e+06	771133	37.603	20.79	8	10	17.4077	9.33	4	5	21.1961	14.24	6	6	26.056	16.86	7	8	11.62	6.38	3	3	17.0737	12.44	5	5	5.21172	4.26	2	2	611	69.2412	6.17627
P48059	LIM and senescent cell antigen-like-containing domain protein 1 OS=Homo sapiens OX=9606 GN=LIMS1 PE=1 SV=4 - [LIMS1_HUMAN]	12.62	1	3	3	5	2.76412e+06	940111	4.36067e+06	0	2.26549e+06	2.63292e+06	0		0				0				0				0			7.17242	8.62	2	2	10.6046	12.62	3	3		0			325	37.2258	8.04541
Q14847	LIM and SH3 domain protein 1 OS=Homo sapiens OX=9606 GN=LASP1 PE=1 SV=2 - [LASP1_HUMAN]	10.34	1	2	2	4	1.13613e+07	0	1.38798e+07	0	0	2560165	0	8.04776	10.34	2	2		0			7.77908	10.34	2	2		0				0				0				0			261	29.6982	7.04932
Q9UHB6	LIM domain and actin-binding protein 1 OS=Homo sapiens OX=9606 GN=LIMA1 PE=1 SV=1 - [LIMA1_HUMAN]	11.86	1	6	6	13	6.047e+06	0	4.32525e+06	2.14035e+06	0	0	0	19.1351	10.14	5	6		0			7.40117	5.53	3	3	5.04718	5.67	3	4		0				0				0			759	85.1734	6.84424
Q8WWI1	LIM domain only protein 7 OS=Homo sapiens OX=9606 GN=LMO7 PE=1 SV=3 - [LMO7_HUMAN]	2.61	1	4	4	5	0	0	2.95867e+06	0	0	0	0		0				0			6.40179	2.61	4	5		0				0				0				0			1683	192.576	8.08936
Q13449	Limbic system-associated membrane protein OS=Homo sapiens OX=9606 GN=LSAMP PE=1 SV=2 - [LSAMP_HUMAN]	26.33	1	7	7	18	0	4.50828e+06	0	1.69091e+06	2.04426e+07	4.92709e+06	2.08412e+06					12.1881	16.27	3	3		0				0			42.2192	26.33	7	12		0			10.0165	16.27	3	3	338	37.3702	6.97607
Q9BU23	Lipase maturation factor 2 OS=Homo sapiens OX=9606 GN=LMF2 PE=1 SV=2 - [LMF2_HUMAN]	4.53	1	2	2	2	0	0	2.01878e+06	0	0	0	0		0				0			8.67963	4.53	2	2						0								0			707	79.6475	10.0962
P11182	Lipoamide acyltransferase component of branched-chain alpha-keto acid dehydrogenase complex, mitochondrial OS=Homo sapiens OX=9606 GN=DBT PE=1 SV=3 - [ODB2_HUMAN]	4.36	1	2	2	2	1.12362e+06	0	0	0	721088	0	0	6.90571	4.36	2	2		0				0				0				0				0				0			482	53.4529	8.51416
Q93052	Lipoma-preferred partner OS=Homo sapiens OX=9606 GN=LPP PE=1 SV=1 - [LPP_HUMAN]	14.05	1	4	4	9	4.08446e+06	0	7.11047e+06	0	0	2.80027e+06	0	13.6499	10.13	3	3		0			8.87555	7.03	2	2		0				0			15.478	14.05	4	4		0			612	65.7038	7.37158
P00338	L-lactate dehydrogenase A chain OS=Homo sapiens OX=9606 GN=LDHA PE=1 SV=2 - [LDHA_HUMAN]	58.13	1	15	16	109	8.26143e+07	5.21351e+07	1.34096e+08	6.77052e+07	6.13984e+07	3.38048e+07	1.68758e+07	57.9873	34.34	10	16	35.4806	32.23	8	11	84.2383	44.58	12	23	63.4122	53.61	14	18	47.1658	45.48	12	16	56.0402	33.43	10	16	29.2814	19.58	5	9	332	36.6654	8.26514
P07195	L-lactate dehydrogenase B chain OS=Homo sapiens OX=9606 GN=LDHB PE=1 SV=2 - [LDHB_HUMAN]	44.31	1	14	15	140	8.82463e+07	7.92632e+07	8.59675e+07	6.77651e+07	1.14153e+08	2.23073e+07	2.95004e+07	84.4599	44.31	14	24	113.782	44.31	14	30	36.6015	32.04	9	11	64.6768	44.31	14	19	104.149	44.31	15	29	32.0536	21.86	6	9	63.5937	37.72	11	18	334	36.6151	6.04932
P36776	Lon protease homolog, mitochondrial OS=Homo sapiens OX=9606 GN=LONP1 PE=1 SV=2 - [LONM_HUMAN]	2.92	1	2	2	2	1.32657e+06	906099	6.27944e+06	0	0	0	0		0				0			7.87716	2.92	2	2		0				0				0				0			959	106.422	6.39209
P24666	Low molecular weight phosphotyrosine protein phosphatase OS=Homo sapiens OX=9606 GN=ACP1 PE=1 SV=3 - [PPAC_HUMAN]	35.44	1	4	4	4	2.11904e+06	2.79776e+06	0	3.48554e+06	5.35167e+06	0	0		0			6.71866	20.89	2	2						0			7.41695	14.56	2	2		0				0			158	18.0308	6.7417
Q14696	LRP chaperone MESD OS=Homo sapiens OX=9606 GN=MESD PE=1 SV=2 - [MESD_HUMAN]	21.79	1	3	3	4	2.01144e+06	1.70557e+06	0	0	0	1.67312e+06	0	6.90998	14.53	2	2		0				0				0				0			7.53849	13.25	2	2		0			234	26.0603	7.78174
O95232	Luc7-like protein 3 OS=Homo sapiens OX=9606 GN=LUC7L3 PE=1 SV=2 - [LC7L3_HUMAN]	5.09	1	2	2	2	507922	0	0	0	0	0	0	9.77749	5.09	2	2		0				0				0				0				0				0			432	51.4351	9.78857
P51884	Lumican OS=Homo sapiens OX=9606 GN=LUM PE=1 SV=2 - [LUM_HUMAN]	37.87	1	10	10	123	1.73703e+07	2.35221e+06	7.40531e+07	7.23932e+06	9.32297e+06	1.01749e+08	2.12454e+07	60.6977	29.29	7	17	7.02291	9.47	2	2	67.3006	26.92	7	19	38.8209	29.29	7	12	40.3596	22.49	5	11	140.556	37.87	10	40	73.4887	30.77	8	22	338	38.4048	6.60986
P05455	Lupus La protein OS=Homo sapiens OX=9606 GN=SSB PE=1 SV=2 - [LA_HUMAN]	14.46	1	4	4	8	7.23151e+06	6.21122e+06	1.22391e+07	4.54095e+06	2.18504e+06	2.06496e+06	0	14.4809	14.46	4	4		0			9.83021	6.62	2	2	8.17568	6.62	2	2		0				0				0			408	46.8082	7.12256
P33241	Lymphocyte-specific protein 1 OS=Homo sapiens OX=9606 GN=LSP1 PE=1 SV=1 - [LSP1_HUMAN]	22.71	1	5	5	11	0	1.8284e+06	1.15049e+07	2.46341e+06	0	6.59338e+06	0		0				0			19.4469	17.4	4	4	11.0285	11.8	2	2		0			23.3628	17.7	4	5		0			339	37.169	4.7417
P10253	Lysosomal alpha-glucosidase OS=Homo sapiens OX=9606 GN=GAA PE=1 SV=4 - [LYAG_HUMAN]	10.4	1	5	5	13	4.81581e+06	4.43788e+06	8.04739e+06	4.38259e+06	0	2.23338e+06	0	24.2942	10.4	5	6		0			11.2077	5.04	3	3		0				0			21.5945	5.67	3	4		0			952	105.257	5.99854
Q14108	Lysosome membrane protein 2 OS=Homo sapiens OX=9606 GN=SCARB2 PE=1 SV=2 - [SCRB2_HUMAN]	19.46	1	6	6	22	5.28659e+06	4.98836e+06	2.27213e+07	4.73407e+06	6.1367e+06	4.93148e+06	0	6.71762	10.04	2	2	9.5821	14.85	4	4	13.0437	12.97	4	4	10.6411	14.85	4	4	6.59007	8.58	3	3	15.4069	14.85	4	5		0			478	54.2555	5.13525
P11279	Lysosome-associated membrane glycoprotein 1 OS=Homo sapiens OX=9606 GN=LAMP1 PE=1 SV=3 - [LAMP1_HUMAN]	9.83	1	4	4	37	6.27078e+06	6.90688e+06	5.95759e+07	8.16482e+06	3.57232e+06	6.29892e+06	2.40599e+06	17.0322	7.67	3	6	15.1137	7.67	3	4	26.1519	9.83	4	8	15.0249	6.47	2	4	14.581	7.67	3	4	19.8473	7.67	3	6	16.7524	7.67	3	5	417	44.8538	8.74854
P13473	Lysosome-associated membrane glycoprotein 2 OS=Homo sapiens OX=9606 GN=LAMP2 PE=1 SV=2 - [LAMP2_HUMAN]	4.39	1	2	2	2	0	0	7.67393e+06	0	0	0	0		0				0			4.41112	4.39	2	2		0				0				0				0			410	44.9323	5.63037
P61626	Lysozyme C OS=Homo sapiens OX=9606 GN=LYZ PE=1 SV=1 - [LYSC_HUMAN]	39.86	1	4	4	17	1.59884e+07	7.98746e+06	2.86935e+07	3.53311e+07	8.95113e+06	1.5276e+07	1.25922e+07		0			15.0045	31.76	3	3	17.1638	27.03	2	3	11.3477	27.03	2	2	14.6418	35.14	3	3	10.6771	27.03	2	2	15.4353	31.76	3	4	148	16.5263	9.15869
P07333	Macrophage colony-stimulating factor 1 receptor OS=Homo sapiens OX=9606 GN=CSF1R PE=1 SV=2 - [CSF1R_HUMAN]	2.98	1	2	2	2	0	0	0	0	0	0	2.63158e+06		0				0				0				0				0							5.32361	2.98	2	2	972	107.915	6.3667
P22897	Macrophage mannose receptor 1 OS=Homo sapiens OX=9606 GN=MRC1 PE=1 SV=1 - [MRC1_HUMAN]	2.88	1	3	3	3	0	0	4.54868e+06	0	0	2.55809e+06	0		0				0				0				0				0			11.2381	2.88	3	3		0			1456	165.905	6.53662
P39900	Macrophage metalloelastase OS=Homo sapiens OX=9606 GN=MMP12 PE=1 SV=1 - [MMP12_HUMAN]	11.28	1	4	4	11	0	0	1.2939e+07	1.59589e+07	0	0	4.03983e+06						0			6.53472	6.17	2	2	11.836	11.28	4	4		0				0			13.6384	8.72	3	5	470	53.9671	8.66064
P14174	Macrophage migration inhibitory factor OS=Homo sapiens OX=9606 GN=MIF PE=1 SV=4 - [MIF_HUMAN]	26.09	1	2	2	20	1.31569e+08	6.37142e+07	0	4.64942e+07	6.45456e+07	3.95428e+07	1.23307e+07	20.9754	26.09	2	7	14.7195	26.09	2	4		0			10.0436	26.09	2	3	9.50515	26.09	2	3		0			8.93784	26.09	2	3	115	12.4682	7.88428
P40121	Macrophage-capping protein OS=Homo sapiens OX=9606 GN=CAPG PE=1 SV=2 - [CAPG_HUMAN]	35.34	1	8	8	72	2.88302e+07	1.92165e+07	6.69558e+07	2.16583e+07	9.95945e+06	1.89586e+07	3.34633e+06	44.9466	35.34	8	12	50.444	35.34	8	13	37.356	25	6	10	43.0729	29.02	7	11	29.2521	27.87	7	8	41.097	25	6	11	25.4913	24.43	6	7	348	38.4745	6.18896
Q14764	Major vault protein OS=Homo sapiens OX=9606 GN=MVP PE=1 SV=4 - [MVP_HUMAN]	40.2	1	23	23	55	7.80144e+06	5.07966e+06	4.73646e+07	6.88081e+06	0	3.06817e+06	0	21.6677	10.08	6	6	15.9879	8.73	5	5	64.3671	34.27	19	23	41.234	20.94	12	13		0			21.1805	12.65	7	8		0			893	99.2659	5.47803
P40925	Malate dehydrogenase, cytoplasmic OS=Homo sapiens OX=9606 GN=MDH1 PE=1 SV=4 - [MDHC_HUMAN]	33.53	1	9	9	58	4.43834e+07	2.19188e+07	4.8779e+07	3.29793e+07	6.90684e+07	1.26253e+07	2.70164e+06	51.6695	30.84	7	12	24.1055	18.86	4	5	19.7009	23.95	5	5	34.1718	26.95	7	9	53.1355	33.53	9	16	29.3963	23.35	5	8	12.7561	13.77	3	3	334	36.403	7.35693
P40926	Malate dehydrogenase, mitochondrial OS=Homo sapiens OX=9606 GN=MDH2 PE=1 SV=3 - [MDHM_HUMAN]	59.47	1	16	16	127	3.9111e+07	2.60835e+07	6.66896e+07	1.71866e+07	6.62935e+07	1.87521e+07	1.52258e+06	75.3984	53.55	14	21	74.6303	55.62	15	22	71.4076	49.41	12	21	43.8635	39.05	10	12	115.978	59.17	15	33	58.9785	52.66	13	18		0			338	35.4807	8.67529
Q14165	Malectin OS=Homo sapiens OX=9606 GN=MLEC PE=1 SV=1 - [MLEC_HUMAN]	22.95	1	4	4	14	2.54529e+06	2.33326e+06	1.41379e+07	1.56071e+06	858234	2.62567e+06	0	22.5227	22.95	4	5	9.78943	10.62	2	2	21.1352	22.95	4	5	9.73896	10.62	2	2		0				0				0			292	32.2136	5.41455
Q9Y5P6	Mannose-1-phosphate guanyltransferase beta OS=Homo sapiens OX=9606 GN=GMPPB PE=1 SV=2 - [GMPPB_HUMAN]	8.89	1	2	2	2	2.55042e+06	0	0	0	0	1397155	0	7.9732	8.89	2	2		0				0				0								0							360	39.8086	6.60986
Q13724	Mannosyl-oligosaccharide glucosidase OS=Homo sapiens OX=9606 GN=MOGS PE=1 SV=5 - [MOGS_HUMAN]	12.78	1	6	6	7	4.31287e+06	0	7.47362e+06	0	0	3.20027e+06	0		0				0			13.4706	8	4	4		0				0			11.9241	6.21	3	3		0			837	91.8606	8.89502
P49006	MARCKS-related protein OS=Homo sapiens OX=9606 GN=MARCKSL1 PE=1 SV=2 - [MRP_HUMAN]	43.59	1	3	3	7	3.13022e+06	320737	0	235859	4.58222e+06	0	369445	8.73441	24.1	2	2		0				0				0			19.1048	43.59	3	5						0			195	19.5172	4.66553
Q8WU39	Marginal zone B- and B1-cell-specific protein OS=Homo sapiens OX=9606 GN=MZB1 PE=1 SV=1 - [MZB1_HUMAN]	34.39	1	4	4	7	0	0	0	0	0	1.95463e+07	0																		0			34.9873	34.39	4	7		0			189	20.6812	5.56689
P43243	Matrin-3 OS=Homo sapiens OX=9606 GN=MATR3 PE=1 SV=2 - [MATR3_HUMAN]	20.78	1	11	11	25	6.50343e+06	2.07315e+06	6.83933e+06	2.0074e+06	3.43392e+06	0	0	34.7031	18.3	10	10	18.88	10.74	5	6	19.5518	10.04	4	5	7.21735	3.66	2	2	8.16007	3.66	2	2		0				0			847	94.5648	6.25244
P08493	Matrix Gla protein OS=Homo sapiens OX=9606 GN=MGP PE=1 SV=2 - [MGP_HUMAN]	23.3	1	2	2	23	0	0	1.1971e+08	1.97474e+07	2.63148e+08	1.14263e+07	0									31.4638	23.3	2	8	20.9423	23.3	2	5	41.3277	23.3	2	10		0							103	12.3453	9.67139
O60882	Matrix metalloproteinase-20 OS=Homo sapiens OX=9606 GN=MMP20 PE=1 SV=3 - [MMP20_HUMAN]	8.07	1	2	2	2	0	0	0	2.75089e+06	0	0	0		0								0			10.5861	8.07	2	2		0				0							483	54.3523	8.86572
P14780	Matrix metalloproteinase-9 OS=Homo sapiens OX=9606 GN=MMP9 PE=1 SV=3 - [MMP9_HUMAN]	14	1	5	5	5	0	0	9.24461e+06	0	0	0	0		0							14.9334	14	5	5		0				0				0				0			707	78.4084	6.06201
P11310	Medium-chain specific acyl-CoA dehydrogenase, mitochondrial OS=Homo sapiens OX=9606 GN=ACADM PE=1 SV=1 - [ACADM_HUMAN]	19.24	1	4	4	4	3.82275e+06	2.45835e+06	0	0	0	2.30004e+06	0		0			6.55433	8.79	2	2	6.20225	10.45	2	2		0				0				0				0			421	46.5586	8.36768
Q15049	Membrane protein MLC1 OS=Homo sapiens OX=9606 GN=MLC1 PE=1 SV=5 - [MLC1_HUMAN]	14.32	1	4	4	5	0	0	0	0	1.01397e+07	0	6.79045e+06		0				0				0				0			13.2662	10.34	3	3					9.12729	9.02	2	2	377	41.1145	7.48877
O00264	Membrane-associated progesterone receptor component 1 OS=Homo sapiens OX=9606 GN=PGRMC1 PE=1 SV=3 - [PGRC1_HUMAN]	47.18	1	7	7	19	8.43901e+06	3.67545e+06	2.43532e+07	8.80474e+06	1.22259e+07	7.01291e+06	0	15.6442	19.49	3	3	13.579	30.77	3	3	30.3771	45.13	5	7		0			14.7981	29.23	4	4	8.08842	7.69	2	2					195	21.6578	4.70361
O15173	Membrane-associated progesterone receptor component 2 OS=Homo sapiens OX=9606 GN=PGRMC2 PE=1 SV=1 - [PGRC2_HUMAN]	26.01	1	4	4	7	3.19816e+06	2.13353e+06	3.25414e+07	2.07349e+06	4.50797e+06	5.56176e+06	0		0			10.9909	8.97	2	2	12.4105	25.56	3	3		0			8.39081	14.8	2	2		0				0			223	23.8037	4.88135
P55145	Mesencephalic astrocyte-derived neurotrophic factor OS=Homo sapiens OX=9606 GN=MANF PE=1 SV=3 - [MANF_HUMAN]	37.91	1	5	5	14	4.46404e+06	2.33093e+06	12422513	0	3.51977e+06	4.193e+06	0	5.66091	23.08	3	3	6.50934	13.74	2	2	9.37699	22.53	3	5		0				0			12.9474	28.57	4	4					182	20.6868	8.68994
Q687X5	Metalloreductase STEAP4 OS=Homo sapiens OX=9606 GN=STEAP4 PE=1 SV=1 - [STEA4_HUMAN]	9.59	1	3	3	3	0	0	0	0	0	2.60717e+06	0		0				0				0				0				0			9.24246	9.59	3	3		0			459	51.9475	9.29053
P51608	Methyl-CpG-binding protein 2 OS=Homo sapiens OX=9606 GN=MECP2 PE=1 SV=1 - [MECP2_HUMAN]	10.08	1	3	3	4	3.61372e+06	856968	2.16207e+06	614743	2179553	757611	0	7.71802	6.38	2	2		0				0				0			9.11218	6.58	2	2		0				0			486	52.4087	9.94971
Q02252	Methylmalonate-semialdehyde dehydrogenase [acylating], mitochondrial OS=Homo sapiens OX=9606 GN=ALDH6A1 PE=1 SV=2 - [MMSA_HUMAN]	36.07	1	11	11	20	6.37809e+06	1.3605e+07	0	4.85576e+06	1.30469e+07	0	0	13.0408	13.46	3	3	19.6876	20.19	5	6		0			12.0024	9.72	3	3	25.4777	27.85	8	8						0			535	57.8027	8.49951
Q9H8H3	Methyltransferase-like protein 7A OS=Homo sapiens OX=9606 GN=METTL7A PE=1 SV=1 - [MET7A_HUMAN]	26.64	1	4	4	21	1.02869e+07	1.37856e+07	2.39487e+07	9.35898e+06	1.67892e+07	1.06322e+07	1.9286e+06	10.9144	12.3	2	2	17.4739	26.64	4	4	19.2687	26.64	4	5	11.6031	20.49	3	3	16.2294	21.72	3	5	8.39628	11.07	2	2		0			244	28.3006	8.38232
Q9NX63	MICOS complex subunit MIC19 OS=Homo sapiens OX=9606 GN=CHCHD3 PE=1 SV=1 - [MIC19_HUMAN]	24.23	1	4	4	9	0	6.47895e+06	1.07776e+07	0	3.1696e+06	1.17066e+06	0		0			8.37055	11.45	2	2	12.0852	12.33	2	3		0			12.8269	24.23	4	4		0				0			227	26.1362	8.27979
Q16891	MICOS complex subunit MIC60 OS=Homo sapiens OX=9606 GN=IMMT PE=1 SV=1 - [MIC60_HUMAN]	22.3	1	12	12	25	4.93345e+06	3.27227e+06	2.00749e+07	3.21147e+06	8.04161e+06	3.50076e+06	0	6.97458	3.69	2	2	8.04365	3.96	2	2	23.8644	13.98	8	8	10.0696	5.94	3	3	20.4091	14.25	7	7	12.3009	5.94	3	3		0			758	83.6264	6.48096
Q13361	Microfibrillar-associated protein 5 OS=Homo sapiens OX=9606 GN=MFAP5 PE=1 SV=1 - [MFAP5_HUMAN]	11.56	1	2	2	2	0	0	2.60454e+06	434204	0	4.63631e+06	0									2.58879	11.56	2	2		0								0							173	19.5988	5.93506
P10620	Microsomal glutathione S-transferase 1 OS=Homo sapiens OX=9606 GN=MGST1 PE=1 SV=1 - [MGST1_HUMAN]	30.32	1	5	5	9	6.31278e+06	2.672e+06	0	4.20624e+06	5.7541e+06	0	0	9.94347	27.1	3	3	9.33279	19.35	3	3					10.3931	30.32	3	3		0											155	17.5872	9.39307
O14880	Microsomal glutathione S-transferase 3 OS=Homo sapiens OX=9606 GN=MGST3 PE=1 SV=1 - [MGST3_HUMAN]	33.55	1	4	4	16	1.45832e+07	9.6714e+06	2.11425e+07	9.48044e+06	3.01018e+07	2.77326e+06	2.79424e+06	14.2195	24.34	3	4	9.22487	24.34	2	2	7.79626	17.76	2	2	7.01239	23.03	2	2	12.1061	24.34	3	4		0			8.2629	24.34	2	2	152	16.5056	9.37842
Q9UPN3	Microtubule-actin cross-linking factor 1, isoforms 1/2/3/5 OS=Homo sapiens OX=9606 GN=MACF1 PE=1 SV=4 - [MACF1_HUMAN]	1.16	1	5	5	6	3.69965e+06	3.18497e+06	4.74895e+06	0	0	2.28098e+06	0		0			5.47829	0.46	2	2	9.04766	0.95	4	4		0				0				0				0			7388	837.787	5.38916
P78559	Microtubule-associated protein 1A OS=Homo sapiens OX=9606 GN=MAP1A PE=1 SV=6 - [MAP1A_HUMAN]	6.78	1	10	11	20	2.01429e+07	1.01592e+07	0	1.35318e+07	1.36436e+07	0	0		0			9.33671	2.28	3	4		0				0			31.1955	4.39	8	11		0				0			2803	305.298	4.91943
P46821	Microtubule-associated protein 1B OS=Homo sapiens OX=9606 GN=MAP1B PE=1 SV=2 - [MAP1B_HUMAN]	39.06	1	55	56	186	19694332	2.65823e+07	0	1.14637e+07	1.89977e+07	0	1.98099e+06	180.711	26.54	35	47	243.579	31.73	44	64		0			78.968	9.81	15	21	182.619	26.5	38	44		0			39.3181	6.89	9	10	2468	270.468	4.80518
P11137	Microtubule-associated protein 2 OS=Homo sapiens OX=9606 GN=MAP2 PE=1 SV=4 - [MTAP2_HUMAN]	26.33	1	31	31	34	0	0	0	0	9.56267e+06	0	0		0				0				0				0			115.042	26.33	31	34		0				0			1827	199.404	4.90674
P27816	Microtubule-associated protein 4 OS=Homo sapiens OX=9606 GN=MAP4 PE=1 SV=3 - [MAP4_HUMAN]	17.53	1	11	11	32	7.88972e+06	1.23266e+07	1.6404e+07	5.36611e+06	5.40622e+06	2.28352e+06	3.77943e+06	24.858	9.9	7	8	18.0004	11.2	6	7		0			9.71811	2.6	2	3	13.7575	5.56	4	4	6.52259	3.99	3	3	20.9588	9.11	7	7	1152	120.93	5.42725
Q96JE9	Microtubule-associated protein 6 OS=Homo sapiens OX=9606 GN=MAP6 PE=1 SV=2 - [MAP6_HUMAN]	2.95	1	2	2	2	0	0	0	0	1.20766e+06	0	0		0				0				0				0			5.57326	2.95	2	2		0				0			813	86.4518	9.15869
Q15691	Microtubule-associated protein RP/EB family member 1 OS=Homo sapiens OX=9606 GN=MAPRE1 PE=1 SV=3 - [MARE1_HUMAN]	32.84	1	5	6	12	9.17523e+06	1.09946e+07	1.54557e+07	5.41091e+06	4.8415e+06	8.77664e+06	0	10.3959	21.64	3	3		0			9.13786	17.54	3	3	6.71898	13.06	2	2	8.85474	20.52	4	4		0				0			268	29.9802	5.13525
Q15555	Microtubule-associated protein RP/EB family member 2 OS=Homo sapiens OX=9606 GN=MAPRE2 PE=1 SV=1 - [MARE2_HUMAN]	37	1	6	6	11	2.9843e+06	3.46659e+06	2.78424e+06	1.44682e+06	1.13576e+07	0	0	11.3173	15.6	3	3		0				0			6.61531	8.87	2	2	17.9844	37	6	6		0				0			327	37.0082	5.56689
Q9UPY8	Microtubule-associated protein RP/EB family member 3 OS=Homo sapiens OX=9606 GN=MAPRE3 PE=1 SV=1 - [MARE3_HUMAN]	12.1	1	2	3	3	0	0	0	0	4.19422e+06	0	0		0				0				0							13.033	12.1	3	3		0							281	31.962	5.5415
P10636	Microtubule-associated protein tau OS=Homo sapiens OX=9606 GN=MAPT PE=1 SV=5 - [TAU_HUMAN]	17.28	1	10	10	13	0	0	0	0	2.1612e+07	0	0		0				0				0				0			38.5818	17.28	10	13		0				0			758	78.8798	6.7124
P21741	Midkine OS=Homo sapiens OX=9606 GN=MDK PE=1 SV=1 - [MK_HUMAN]	31.47	1	3	3	3	0	0	0	0	5577576	0	0		0				0											12.0886	31.47	3	3		0							143	15.575	9.78857
P20774	Mimecan OS=Homo sapiens OX=9606 GN=OGN PE=1 SV=1 - [MIME_HUMAN]	14.43	1	4	4	13	0	0	2.46942e+07	933890	2.01244e+07	1.89411e+07	0		0							17.7975	14.43	4	5		0			14.862	12.75	3	4	14.0592	14.43	4	4					298	33.9009	5.63037
Q8TCT9	Minor histocompatibility antigen H13 OS=Homo sapiens OX=9606 GN=HM13 PE=1 SV=1 - [HM13_HUMAN]	9.55	1	2	2	2	5.76907e+06	0	1.54266e+07	0	0	0	0		0				0			7.75237	9.55	2	2		0				0				0				0			377	41.4616	6.43018
Q02978	Mitochondrial 2-oxoglutarate/malate carrier protein OS=Homo sapiens OX=9606 GN=SLC25A11 PE=1 SV=3 - [M2OM_HUMAN]	18.79	1	5	5	13	0	0	1.28917e+07	3.846e+06	8.0139e+06	0	0		0				0			19.2039	18.79	5	6	9.73245	9.55	2	2	18.1289	15.29	4	5		0				0			314	34.0399	9.90576
Q9Y6C9	Mitochondrial carrier homolog 2 OS=Homo sapiens OX=9606 GN=MTCH2 PE=1 SV=1 - [MTCH2_HUMAN]	11.22	1	2	2	12	5.9349e+06	4.76771e+06	1.60061e+07	4.83888e+06	8.74934e+06	2.54468e+06	0	6.10577	11.22	2	2	7.11594	11.22	2	2	13.55	11.22	2	3	6.47202	11.22	2	2	12.8621	11.22	2	3		0							303	33.3089	7.97217
Q9H936	Mitochondrial glutamate carrier 1 OS=Homo sapiens OX=9606 GN=SLC25A22 PE=1 SV=1 - [GHC1_HUMAN]	22.29	1	4	4	5	0	0	0	0	5.48365e+06	0	0		0				0								0			18.2321	22.29	4	5		0				0			323	34.4483	9.29053
Q9Y5L4	Mitochondrial import inner membrane translocase subunit Tim13 OS=Homo sapiens OX=9606 GN=TIMM13 PE=1 SV=1 - [TIM13_HUMAN]	53.68	1	5	5	7	3.24531e+06	0	4.84836e+06	0	1.90472e+06	1.00229e+06	0	9.80247	26.32	2	3					7.25596	27.37	2	2		0			5.38194	31.58	2	2		0				0			95	10.493	8.17725
Q9Y5J7	Mitochondrial import inner membrane translocase subunit Tim9 OS=Homo sapiens OX=9606 GN=TIMM9 PE=1 SV=1 - [TIM9_HUMAN]	34.83	1	2	2	2	2.64561e+06	259768	0	0	2.08487e+06	0	0	6.34944	34.83	2	2		0				0				0				0				0				0			89	10.3711	7.21045
Q9NS69	Mitochondrial import receptor subunit TOM22 homolog OS=Homo sapiens OX=9606 GN=TOMM22 PE=1 SV=3 - [TOM22_HUMAN]	25.35	1	2	2	2	2.63144e+06	0	5.24827e+06	1.5959e+06	2.75552e+06	0	0		0							6.80112	25.35	2	2		0				0				0				0			142	15.5118	4.33545
O96008	Mitochondrial import receptor subunit TOM40 homolog OS=Homo sapiens OX=9606 GN=TOMM40 PE=1 SV=1 - [TOM40_HUMAN]	12.19	1	2	2	2	0	0	1.34891e+07	0	0	0	0		0				0			8.86814	12.19	2	2		0				0								0			361	37.8691	7.25439
O94826	Mitochondrial import receptor subunit TOM70 OS=Homo sapiens OX=9606 GN=TOMM70 PE=1 SV=1 - [TOM70_HUMAN]	9.87	1	4	4	7	0	0	5.98194e+06	3.20606e+06	4.54424e+06	0	0		0				0			18.2541	9.87	4	5		0			8.40861	4.93	2	2		0				0			608	67.412	7.12256
P28482	Mitogen-activated protein kinase 1 OS=Homo sapiens OX=9606 GN=MAPK1 PE=1 SV=3 - [MK01_HUMAN]	45	1	10	14	50	1.14431e+07	1.18614e+07	541053	7.76754e+06	2.33965e+07	2.55325e+06	2.33807e+06	33.4226	29.72	7	8	58.5467	39.72	11	15		0			34.1047	29.72	7	8	51.0934	34.72	9	14		0			18.8858	20.83	4	5	360	41.3632	6.97607
P27361	Mitogen-activated protein kinase 3 OS=Homo sapiens OX=9606 GN=MAPK3 PE=1 SV=4 - [MK03_HUMAN]	30.34	1	4	8	26	6.05805e+06	9.05421e+06	541053	5.46511e+06	1.28153e+07	0	0	14.5275	13.19	3	4	32.3907	27.7	7	9		0			11.5419	17.68	4	4	35.6994	15.83	4	9		0				0			379	43.1081	6.7417
O43684	Mitotic checkpoint protein BUB3 OS=Homo sapiens OX=9606 GN=BUB3 PE=1 SV=1 - [BUB3_HUMAN]	7.93	1	2	2	2	1.61559e+06	0	1.68798e+06	461916	0	0	0	7.29484	7.93	2	2		0				0				0				0				0				0			328	37.1312	6.84424
P26038	Moesin OS=Homo sapiens OX=9606 GN=MSN PE=1 SV=3 - [MOES_HUMAN]	50.95	1	22	28	156	4.32932e+07	3.81764e+07	6.97698e+07	2.19053e+07	3.54807e+07	2.2505e+07	7.66168e+06	111.711	38.47	18	28	121.993	40.9	20	34	69.6376	34.84	16	20	74.4898	32.58	14	20	77.0449	32.58	14	21	80.5802	33.62	15	23	34.33	20.1	8	10	577	67.7778	6.40479
P08571	Monocyte differentiation antigen CD14 OS=Homo sapiens OX=9606 GN=CD14 PE=1 SV=2 - [CD14_HUMAN]	38.4	1	9	9	21	1.79008e+06	0	1.43536e+07	0	0	9061430	1.21587e+07		0								0				0				0			32.1319	26.67	5	8	43.6254	38.4	9	13	375	40.0507	6.22705
P22234	Multifunctional protein ADE2 OS=Homo sapiens OX=9606 GN=PAICS PE=1 SV=3 - [PUR6_HUMAN]	22.12	1	6	6	9	5.3495e+06	2.66614e+06	0	0	6.40271e+06	0	0	20.925	22.12	6	6	9.39294	10.59	3	3		0				0				0				0				0			425	47.0491	7.2251
O00499	Myc box-dependent-interacting protein 1 OS=Homo sapiens OX=9606 GN=BIN1 PE=1 SV=1 - [BIN1_HUMAN]	20.57	1	7	7	10	2.62655e+06	0	0	0	2.32689e+07	2.10653e+06	0	8.14789	6.07	2	2		0				0				0			29.9263	20.57	7	8		0				0			593	64.6594	5.05908
P02686	Myelin basic protein OS=Homo sapiens OX=9606 GN=MBP PE=1 SV=3 - [MBP_HUMAN]	24.01	1	7	7	47	0	0	0	0	4.51056e+08	0	0		0				0											144.491	24.01	7	47		0				0			304	33.0973	9.78857
P02689	Myelin P2 protein OS=Homo sapiens OX=9606 GN=PMP2 PE=1 SV=3 - [MYP2_HUMAN]	19.7	1	1	2	4	0	0	2.43383e+07	9.11365e+06	7.04029e+06	0	0		0				0				0				0			6.95461	19.7	2	2						0			132	14.8999	9.83252
P60201	Myelin proteolipid protein OS=Homo sapiens OX=9606 GN=PLP1 PE=1 SV=2 - [MYPR_HUMAN]	17.33	1	4	4	27	0	1.33498e+06	0	0	8.6893e+08	0	0		0				0				0				0			88.2993	17.33	4	27		0							277	30.0571	8.35303
P20916	Myelin-associated glycoprotein OS=Homo sapiens OX=9606 GN=MAG PE=1 SV=1 - [MAG_HUMAN]	3.35	1	2	2	2	0	0	0	0	1.18124e+07	0	0		0				0				0				0			5.76476	3.35	2	2									626	69.0247	5.03369
Q16653	Myelin-oligodendrocyte glycoprotein OS=Homo sapiens OX=9606 GN=MOG PE=1 SV=2 - [MOG_HUMAN]	20.65	1	6	6	10	0	0	0	0	5.08522e+07	0	0		0				0											37.5006	20.65	6	10									247	28.1749	8.55811
P24158	Myeloblastin OS=Homo sapiens OX=9606 GN=PRTN3 PE=1 SV=3 - [PRTN3_HUMAN]	14.06	1	2	2	4	0	0	1.47318e+07	0	0	4.45145e+06	0						0			8.68022	14.06	2	2		0							5.39025	14.06	2	2					256	27.7893	8.35303
Q969H8	Myeloid-derived growth factor OS=Homo sapiens OX=9606 GN=MYDGF PE=1 SV=1 - [MYDGF_HUMAN]	20.81	1	3	3	4	5.56293e+06	0	1.43442e+07	0	2.7608e+07	1.24393e+07	0	2.62857	13.87	2	2		0				0				0				0			3.41537	15.61	2	2		0			173	18.7833	6.68311
P05164	Myeloperoxidase OS=Homo sapiens OX=9606 GN=MPO PE=1 SV=1 - [PERM_HUMAN]	34.36	1	19	19	44	0	1.70943e+06	1.71029e+07	6.91345e+06	58356170	1.00062e+07	1.9868e+06		0			7.27268	4.97	2	2	51.7016	25.23	13	15	43.2775	16.11	9	11		0			45.2158	17.45	10	12	15.3363	6.58	4	4	745	83.8148	8.96826
Q9NZM1	Myoferlin OS=Homo sapiens OX=9606 GN=MYOF PE=1 SV=1 - [MYOF_HUMAN]	25.52	1	37	37	62	2.31952e+06	1.15603e+06	3.65664e+07	3.0099e+06	6.72783e+06	4.56424e+06	0	16.8308	4.56	5	5	3.56766	1.46	2	2	115.252	21.54	30	31	13.9074	4.12	5	5		0			63.9051	12.57	19	19		0			2061	234.561	6.17627
P60660	Myosin light polypeptide 6 OS=Homo sapiens OX=9606 GN=MYL6 PE=1 SV=2 - [MYL6_HUMAN]	52.98	3	8	8	103	6.9672e+07	2.51648e+07	2.89389e+08	4.07559e+07	2.74414e+07	39994184	3.14811e+06	79.48	52.98	8	21	35.7408	52.98	6	10	93.4608	52.98	8	24	48.1623	52.98	8	13	51.4864	52.98	8	14	65.4628	45.7	6	17	15.2633	39.74	4	4	151	16.9191	4.65283
P19105	Myosin regulatory light chain 12A OS=Homo sapiens OX=9606 GN=MYL12A PE=1 SV=2 - [ML12A_HUMAN]	62.57	2	5	10	61	4.52896e+07	1.55507e+07	2.15921e+08	2.52074e+07	2.49446e+07	2.17259e+07	1.83999e+06	44.4319	50.88	7	11	31.1438	40.35	6	7	77.4099	62.57	9	18	33.0178	45.61	7	8	29.0641	50.88	6	7	44.6108	44.44	6	10		0			171	19.7815	4.80518
P24844	Myosin regulatory light polypeptide 9 OS=Homo sapiens OX=9606 GN=MYL9 PE=1 SV=4 - [MYL9_HUMAN]	62.21	1	5	10	42	3.46233e+07	1.16464e+07	1.27254e+08	1.86364e+07	2.21588e+07	1.23765e+07	0		0				0				0			33.1567	56.4	7	8		0			47.059	55.81	7	11		0			172	19.8144	4.91943
P35580	Myosin-10 OS=Homo sapiens OX=9606 GN=MYH10 PE=1 SV=3 - [MYH10_HUMAN]	22.98	1	21	32	107	6.10478e+07	5.20057e+06	1.0084e+08	9.143e+06	3.43534e+07	1.41424e+07	0	90.2976	13.87	19	24	29.9685	6.22	8	8	84.3082	9.67	15	23		0			100.34	18.17	24	25	78.2249	11.44	16	21		0			1976	228.858	5.5415
P35749	Myosin-11 OS=Homo sapiens OX=9606 GN=MYH11 PE=1 SV=3 - [MYH11_HUMAN]	17.8	1	14	25	88	2.0229e+07	5.16015e+06	1.12222e+08	6.55104e+06	8.89681e+06	9.51872e+06	0		0				0			104.059	10.24	16	25		0			99.6134	15.21	19	22		0				0			1972	227.199	5.50342
Q7Z406	Myosin-14 OS=Homo sapiens OX=9606 GN=MYH14 PE=1 SV=2 - [MYH14_HUMAN]	25.96	1	28	37	94	2.13002e+07	4.9249e+06	1.15915e+08	8.34795e+06	8.46875e+06	8.73437e+06	0	65.7003	10.43	15	17		0			164.299	23.01	33	42	67.4722	11.88	16	18		0				0				0			1995	227.732	5.60498
P35579	Myosin-9 OS=Homo sapiens OX=9606 GN=MYH9 PE=1 SV=4 - [MYH9_HUMAN]	54.85	1	88	103	527	7.65454e+07	1.05606e+07	2.23532e+08	1.55491e+07	3.68775e+07	2.49249e+07	1.67785e+06	426.408	44.59	74	107	170.178	31.84	41	45	774.293	53.98	99	191	129.085	22.55	30	34	254.341	32.3	44	58	365.784	40.77	63	89	14.5063	1.68	2	3	1960	226.392	5.60498
[truncated: 692 more rows]

## Sheet: S4 input gene list
		Mapped IDs		hide column	hide column	hide column
[truncated: 1,312 more rows]

[truncated: 4 more sheets: S5_PANTHERpathways_, S6_Pantherpathw component list, S7_PANTHERpathw_Over-represent, S8_Reactomepathw over-represent]
